# Supplementary material for: An Untargeted Metabolomics Analysis in Feces and Brain of Orthoflaviviruses-infected Mice
Source: Research Square preprint supplement (doi:10.21203/rs.3.rs-6668187/v1), 2025-06-02
Supplement: Supplementary file 1 [file 9389bc766c979765bccad93a.xlsx]

## Sheet: DENV
Pattern:	Times found:	Percentage:
C-Cys	57	1.68
H-His	65	1.92
Y-Tyr	73	2.16
W-Trp	90	2.66
Q-Gln	100	2.95
F-Phe	102	3.01
M-Met	127	3.75
D-Asp	131	3.87
N-Asn	137	4.05
P-Pro	146	4.31
S-Ser	191	5.64
R-Arg	194	5.73
K-Lys	215	6.35
I-Ile	216	6.38
V-Val	220	6.5
A-Ala	226	6.67
E-Glu	240	7.09
T-Thr	266	7.86
G-Gly	278	8.21
L-Leu	312	9.21
Aliphatic G,A,V,L,I	1252	36.98
Aromatic F,W,Y	265	7.83
Sulphur C,M	184	5.43
Basic K,R,H	474	14
Acidic D,E,N,Q	608	17.96
Aliphatic hydroxyl S,T	457	13.5
tRNA synthetase class I E,Q,R,C,M,V,I,L,Y,W	1629	48.11
tRNA synthetase class II G,A,P,S,T,H,D,N,K,F	1757	51.89

## Sheet: JEV
Pattern:	Times found:	Percentage:
C-Cys	56	1.63
H-His	72	2.1
Y-Tyr	87	2.53
Q-Gln	89	2.59
W-Trp	94	2.74
F-Phe	109	3.18
M-Met	112	3.26
N-Asn	124	3.61
P-Pro	142	4.14
D-Asp	163	4.75
I-Ile	163	4.75
K-Lys	189	5.51
S-Ser	193	5.62
E-Glu	204	5.94
R-Arg	210	6.12
T-Thr	245	7.14
V-Val	285	8.3
A-Ala	289	8.42
L-Leu	302	8.8
G-Gly	304	8.86
Aliphatic G,A,V,L,I	1343	39.13
Aromatic F,W,Y	290	8.45
Sulphur C,M	168	4.9
Basic K,R,H	471	13.72
Acidic D,E,N,Q	580	16.9
Aliphatic hydroxyl S,T	438	12.76
tRNA synthetase class I E,Q,R,C,M,V,I,L,Y,W	1602	46.68
tRNA synthetase class II G,A,P,S,T,H,D,N,K,F	1830	53.32

## Sheet: ZIKV
Pattern:	Times found:	Percentage:
C-Cys	63	1.84
H-His	76	2.22
Q-Gln	77	2.25
Y-Tyr	88	2.57
W-Trp	93	2.72
F-Phe	96	2.8
N-Asn	102	2.98
M-Met	125	3.65
P-Pro	141	4.12
D-Asp	156	4.56
I-Ile	175	5.11
K-Lys	187	5.46
S-Ser	212	6.19
E-Glu	217	6.34
R-Arg	220	6.43
T-Thr	227	6.63
V-Val	265	7.74
A-Ala	284	8.3
G-Gly	306	8.94
L-Leu	313	9.14
Aliphatic G,A,V,L,I	1343	39.23
Aromatic F,W,Y	277	8.09
Sulphur C,M	188	5.49
Basic K,R,H	483	14.11
Acidic D,E,N,Q	552	16.13
Aliphatic hydroxyl S,T	439	12.83
tRNA synthetase class I E,Q,R,C,M,V,I,L,Y,W	1636	47.79
tRNA synthetase class II G,A,P,S,T,H,D,N,K,F	1787	52.21
