# Supplementary material for: An Untargeted Metabolomics Analysis in Feces and Brain of Orthoflaviviruses-infected Mice
Source: Research Square preprint supplement (doi:10.21203/rs.3.rs-6668187/v1), 2025-06-02
Supplement: Supplementary file 2 [file a65244bb3f06fecabcaa82af.xlsx]

## Sheet: DENV_Feces
Pathway	Total	Hits	Metabolites
Steroid hormone biosynthesis	79	4	w Hydroxy testosterone; 11b,21-Dihydroxy-3,20-oxo-5b-pregnan-18-al; 16-Glucuronide-estriol; Estradiol-17beta 3-glucuronide
Ascorbate and aldarate metabolism	10	1	15-Hydroxynorandrostene-3,17-dione glucuronide
Pentose and glucuronate interconversions	19	1	15-Hydroxynorandrostene-3,17-dione glucuronide
Glutathione metabolism	28	1	Trypanothione
Sphingolipid metabolism	32	1	Sphingosine 1-phosphate
Cysteine and methionine metabolism	33	1	L-Cystine
Tyrosine metabolism	42	1	5,6-Dihydroxyindole

## Sheet: DENV_Brain
Pathway	Total	Hits	Metabolites
Glycerophospholipid metabolism	36	2	PC(18:0/15:0); LysoPC(18:1(9Z))/LysoPC(20:4(5Z,8Z,11Z,14Z))
Linoleic acid metabolism	5	1	PC(18:0/15:0)
alpha-Linolenic acid metabolism	13	1	PC(18:0/15:0)
Lipoic acid metabolism	28	1	Lipoyl-AMP
Cysteine and methionine metabolism	33	1	5'-Methylthioadenosine
Fatty acid elongation	39	1	Lauroyl-CoA
Fatty acid degradation	39	1	Lauroyl-CoA
Arachidonic acid metabolism	43	1	PC(18:0/15:0)
Purine metabolism	71	1	GMP

## Sheet: JEV_Feces
Pathway	Total	Hits	Metabolites
Glycerophospholipid metabolism	36	3	PE(20:0/18:4(6Z,9Z,12Z,15Z)); LysoPC(16:0); LysoPA(0:0/18:0)
Thiamine metabolism	7	1	Thiamine
Purine metabolism	71	2	Deoxyinosine; Hypoxanthine
Glycosylphosphatidylinositol (GPI)-anchor biosynthesis	15	1	PE(20:0/18:4(6Z,9Z,12Z,15Z))
Glycerolipid metabolism	16	1	LysoPA(0:0/18:0)
Histidine metabolism	16	1	N-Methylhistamine
Drug metabolism - cytochrome P450	27	1	3-Hydroxylidocaine
Sphingolipid metabolism	32	1	Sphingosine 1-phosphate
Arachidonic acid metabolism	43	1	Prostaglandin H2
Primary bile acid biosynthesis	46	1	Coprocholic acid

## Sheet: JEV_Brain
Pathway	Total	Hits	Metabolites
Amino sugar and nucleotide sugar metabolism	42	3	UDP-N-acetyl-alpha-D-glucosamine; UDP-glucose; GDP-mannose
Vitamin B6 metabolism	9	1	4-Pyridoxic acid
Ascorbate and aldarate metabolism	10	1	UDP-glucose
Starch and sucrose metabolism	15	1	UDP-glucose
Fructose and mannose metabolism	18	1	GDP-mannose
Pentose and glucuronate interconversions	19	1	UDP-glucose
Pantothenate and CoA biosynthesis	20	1	phosphopantothenic acid
beta-Alanine metabolism	21	1	Acrylyl-CoA
Propanoate metabolism	22	1	Acrylyl-CoA
Galactose metabolism	27	1	UDP-glucose
Biosynthesis of unsaturated fatty acids	36	1	Stearic acid
N-Glycan biosynthesis	41	1	GDP-mannose
Purine metabolism	71	1	5-Aminoimidazole ribonucleotide

## Sheet: ZIKV_Feces
Pathway	Total	Hits	Metabolites
Vitamin B6 metabolism	9	1	4-Pyridoxic acid
One carbon pool by folate	9	1	5-Formiminotetrahydrofolic acid
Glycerolipid metabolism	16	1	LysoPA(0:0/18:0)
Drug metabolism - cytochrome P450	27	1	5-Phenyl-1,3-oxazinane-2,4-dione
Cysteine and methionine metabolism	33	1	L-Cystine
Glycerophospholipid metabolism	36	1	LysoPA(0:0/18:0)
Primary bile acid biosynthesis	46	1	3 beta-Hydroxy-5-cholestenoate
Purine metabolism	71	1	Inosine
