# Supplementary material for: An Untargeted Metabolomics Analysis in Feces and Brain of Orthoflaviviruses-infected Mice
Source: Research Square preprint supplement (doi:10.21203/rs.3.rs-6668187/v1), 2025-06-02
Supplement: Supplementary file 3 [file b8564c5ba657b342b924b7d7.xlsx]

## Sheet: DENV_Feces
															Normalised abundance										Raw abundance
															Ctrl					DENV					Ctrl					DENV					Tags
	Compound	Neutral mass (Da)	m/z	Charge	Retention time (min)	Chromatographic peak width (min)	Identifications	q Value	Max Fold Change	Highest Mean	Lowest Mean	Isotope Distribution	Maximum Abundance	Minimum CV%	Ctrl-1_neg	Ctrl-2_neg	Ctrl-3_neg	Ctrl-4_neg	Ctrl-5_neg	DENV-1_neg	DENV-2_neg	DENV-3_neg	DENV-4_neg	DENV-5_neg	Ctrl-1_neg	Ctrl-2_neg	Ctrl-3_neg	Ctrl-4_neg	Ctrl-5_neg	DENV-1_neg	DENV-2_neg	DENV-3_neg	DENV-4_neg	DENV-5_neg	DENV vs Ctrl VIP>1	Minimum CV <= 30	DENV vs Ctrl Anova p-value <= 0.05	DENV vs Ctrl	Accepted Compound ID	Accepted Description	Adducts	Formula	Score	Fragmentation Score	Mass Error (ppm)	Isotope Similarity	Compound Link	Anova (p)	VIP
neg	4.41_759.4339m/z		759.434	1	4.41115	0.0571167	4	0.751757	14.5677	DENV	Ctrl	100 - 46.9 - 16.8 - 2.63	19231.5	100.64	235.734	1396.37	519.911	3833.29	615.427	5961.15	14109.5	9334.99	13400.7	53351	254.866	1182.97	559.57	3846.41	533.019	6093.58	18363.8	8909.21	11907.4	49527.9	x	x	x	x	CSID10128280	(1'R,2R,4S,4'S,5S,6R,8'R,10'E,12'S,13'S,14'E,16'E,20'R,21'R,24'S)-6-[(2S)-2-Butanyl]-4,24'-dihydroxy-21'-methoxy-5,11',13',22'-tetramethyl-2'-oxo-3,4,5,6-tetrahydrospiro[pyran-2,6'-[3,7,19]trioxatetracyclo[15.6.1.1~4,8~.0~20,24~]pentacosa[10,14,16,22]tetraen]-12'-yl 2,6-dideoxy-3-O-methyl-alpha-L-arabino-hexopyranoside	M-H	C42H64O12	43.9	24.3	1.83519	97.2657	http://nonlinear.com/redirect/outbound?p=chemspider&param=10128280	0.00150473	3.16763
	4.41_334.2105n	334.211	379.21	1	4.41115	0.250067	36	0.751757	3.64861	DENV	Ctrl	100 - 24.9	109927	45.76	13316.6	36959.6	19919.5	51686.8	28760.4	69854.7	95186.8	88207.7	98708.6	197679	14397.4	31311.1	21439	51863.6	24909.2	71406.6	123887	84184.5	87709.2	183514	x	x	x	x	HMDB0041055	Phytocassane B	M-H, M+FA-H	C20H30O4	42.8	31.4	-11.5908	95.1578	http://nonlinear.com/redirect/outbound?p=hmdb&param=HMDB0041055	0.0018973	7.63591
	7.71_349.2357m/z		349.236	1	7.7131	0.1073	50	0.777895	3.32523	DENV	Ctrl	100 - 19.8 - 0.41	7292.58	50.65	1308.43	2324.14	1442.17	4504.37	1386.41	4138.55	12633.7	5741.91	4376.25	9572.49	1414.62	1968.94	1552.18	4519.78	1200.76	4230.49	16442.9	5480.02	3888.59	8886.54	x	x	x	x	CSID223205	MFCD18429450	M+FA-H	C20H32O2	51.5	71.1	-8.89599	96.1455	http://nonlinear.com/redirect/outbound?p=chemspider&param=223205	0.00511854	1.86245
	5.66_429.1938m/z		429.194	1	5.65885	0.171317	21	0.777895	3.15278	DENV	Ctrl	100 - 22.6	19776	25.26	5426.02	6479.36	5639.54	8917.85	4899.97	11129.6	54052.5	9031.33	8421.92	16244.4	5866.41	5489.12	6069.72	8948.36	4243.84	11376.9	70350	8619.39	7483.44	15080.4	x	x	x	x	HMDB0006224	17-beta-Estradiol-3-glucuronide	M-H2O-H	C24H32O8	42.2	23.4	4.27987	92.5837	http://nonlinear.com/redirect/outbound?p=hmdb&param=HMDB0006224	0.0371646	2.48407
	4.58_382.2333n	382.233	381.226	1	4.58175	0.249133	2	0.777895	3.14222	DENV	Ctrl	100 - 25.5 - 12.2 - 2.72	133051	34.74	20367.2	51576.8	34611.2	56330.8	48829.1	83831.1	119743	81995.3	73281.9	306405	22020.2	43694.3	37251.3	56523.5	42290.7	85693.6	155847	78255.4	65115.9	284448	x	x	x	x	HMDB0240273	Pyrvinium	M-H, 2M-H	C26H28N3+	35.9	2.92	12.9376	90.0628	http://nonlinear.com/redirect/outbound?p=hmdb&param=HMDB0240273	0.0118775	7.09734
	3.62_382.2321n	382.232	381.225	1	3.61845	0.107083	3	0.751757	2.98943	DENV	Ctrl	100 - 23.3	22867.6	31.59	5417.42	8300.33	5766.62	11432.3	7330.85	11525.8	21511.9	22897.8	19215.7	39186.7	5857.11	7031.79	6206.5	11471.4	6349.22	11781.9	27998.1	21853.4	17074.5	36378.6	x	x	x	x	HMDB0240273	Pyrvinium	M-H, 2M-H	C26H28N3+	36.2	0.0843	9.99574	91.9021	http://nonlinear.com/redirect/outbound?p=hmdb&param=HMDB0240273	0.00213597	3.30738
	6.57_208.1433n	208.143	415.212	1	6.57173	0.106583	15	0.777895	2.87181	DENV	Ctrl	100 - 16.9	14086.8	38.91	4459.3	5003.82	3757.75	8094.85	3210.35	6932.86	33533.1	6208.51	8808.72	14950.9	4821.23	4239.08	4044.39	8122.55	2780.47	7086.88	43643.8	5925.33	7827.14	13879.6	x	x	x	x	HMDB0038047	Carvyl propionate	M+FA-H, 2M-H	C13H20O2	37.8	7.63	-14.6482	96.6641	http://nonlinear.com/redirect/outbound?p=hmdb&param=HMDB0038047	0.0331046	2.15426
	5.17_431.2079m/z		431.208	1	5.1666	0.24935	26	0.777895	2.63052	DENV	Ctrl	100 - 23.2 - 13.9	64163.9	18.67	27995.5	23435.6	23722	29178.3	17629.1	47677.8	150674	39082.6	38213.1	45171.6	30267.7	19853.9	25531.5	29278.2	15268.5	48737	196105	37300	33954.9	41934.7	x	x	x	x	HMDB0038787	Melleolide B	M-H	C24H32O7	40.1	10.7	0.774995	90.7262	http://nonlinear.com/redirect/outbound?p=hmdb&param=HMDB0038787	0.016683	4.52699
	6.22_363.2148m/z		363.215	1	6.21532	0.2993	76	0.777895	2.57259	DENV	Ctrl	100 - 24 - 21.7 - 3.75	35088.4	30.17	9723.48	15904.4	9246.02	24314.6	9008.37	28177.5	38879.6	34774.8	23020.3	50590.1	10512.7	13473.7	9951.3	24397.8	7802.11	28803.5	50602.4	33188.7	20455.1	46964.9	x	x	x	x	HMDB0035311	Galanal A	M+FA-H	C20H30O3	47.4	63	-8.98431	83.8307	http://nonlinear.com/redirect/outbound?p=hmdb&param=HMDB0035311	0.00309624	4.05199
	4.09_377.1925m/z		377.193	1	4.08968	0.12135	51	0.720348	2.44281	DENV	Ctrl	100 - 17.4	9724.56	20.61	3125.38	4523.17	3145.15	4947.11	4163.62	8285.76	7027.21	8625.52	10885.6	13798.7	3379.04	3831.89	3385.06	4964.04	3606.09	8469.84	9146.01	8232.1	9672.57	12809.9	x	x	x	x	HMDB0036604	N-Methylcalystegine B2	2M-H	C8H15NO4	38.2	0.156	-1.04619	92.197	http://nonlinear.com/redirect/outbound?p=hmdb&param=HMDB0036604	0.000382396	2.1565
	4.41_469.2077m/z		469.208	1	4.41115	0.0499667	8	0.777895	2.33592	DENV	Ctrl	100 - 47	2782	22.17	1283.9	1260.34	732.973	1416.46	1261.17	1654.72	3243.06	2113.58	2486.11	4412.54	1388.11	1067.72	788.884	1421.31	1092.29	1691.48	4220.88	2017.18	2209.08	4096.34	x	x	x	x	HMDB0039013	8beta-Angeloyloxy-15-hydroxy-1alpha,10R-dimethoxy-3-oxo-11(13)-germacren-12,6alpha-olide	M+FA-H	C22H32O8	40.2	19.9	-0.558746	81.84	http://nonlinear.com/redirect/outbound?p=hmdb&param=HMDB0039013	0.00425743	1.06422
	5.41_429.1933m/z		429.193	1	5.40952	0.157033	21	0.777895	2.27172	DENV	Ctrl	100 - 33.9	20999.3	17.41	8842.75	10153.6	7888.2	11561.2	7773.35	13660.3	46546.3	14115.4	15092.3	15582.4	9560.45	8601.8	8489.91	11600.7	6732.47	13963.8	60580.6	13471.5	13410.5	14465.8	x	x	x	x	HMDB0037041	Melleolide C	M-H2O-H	C24H32O8	44.4	34.8	3.18946	90.6871	http://nonlinear.com/redirect/outbound?p=hmdb&param=HMDB0037041	0.021287	2.46204
	7.67_315.2515m/z		315.252	1	7.67027	0.1644	49	0.777895	2.21295	DENV	Ctrl	100 - 19.6 - 3.56 - 0.0346	14912.4	45.67	8408.19	5596.71	2501.48	6255.71	10931.4	21208	7991.21	9322.92	22889.3	13150.6	9090.61	4741.37	2692.3	6277.11	9467.68	21679.2	10400.7	8897.69	20338.7	12208.2	x	x	x	x	HMDB0072878	MG(i-15:0/0:0/0:0)	M-H	C18H36O4	39.6	8.03	-8.08979	98.7439	http://nonlinear.com/redirect/outbound?p=hmdb&param=HMDB0072878	0.037302	2.25141
	4.75_443.1749m/z		443.175	1	4.75328	0.142983	39	0.777895	2.17841	DENV	Ctrl	100 - 25.1	16699.7	11.75	7670.9	7247.17	7309.85	9201.1	6900.97	12609.7	38008.7	9804.75	9507.14	13568.2	8293.48	6139.58	7867.44	9232.58	5976.9	12889.8	49468.9	9357.54	8447.73	12595.9	x	x	x	x	CSID25104194	Mapracorat	M-H2O-H	C25H26F4N2O2	40.7	10.2	-0.597849	94.1819	http://nonlinear.com/redirect/outbound?p=chemspider&param=25104194	0.0402147	2.09083
	9.65_561.3772m/z		561.377	1	9.64743	0.1278	5	0.777895	2.1712	DENV	Ctrl	100 - 23.8	4652.12	36.77	1077.08	4159.07	1618.18	1759.86	2099.07	3158.79	6832.8	5095.65	2692.82	5480.56	1164.5	3523.44	1741.62	1765.89	1818	3228.97	8892.98	4863.23	2392.75	5087.83	x	x	x	x	HMDB0034645	22-Acetylpriverogenin B	M+FA-H	C32H52O5	45.5	46.8	-4.84372	86.1577	http://nonlinear.com/redirect/outbound?p=hmdb&param=HMDB0034645	0.0195639	1.28284
	2.36_447.1998m/z		447.2	1	2.36362	0.100133	45	0.777895	2.11439	DENV	Ctrl	100 - 13.3	10981.3	6.47	5535.54	5067.36	4691.34	5449.13	5224.76	7198.93	24477.5	8725.66	6724.88	7779.77	5984.82	4292.92	5049.19	5467.78	4525.14	7358.86	31857.8	8327.67	5975.51	7222.28	x	x	x	x	HMDB0030680	Diplosporin	2M-H	C12H16O4	39.2	4.45	-5.96639	98.4046	http://nonlinear.com/redirect/outbound?p=hmdb&param=HMDB0030680	0.0341278	1.68541
	4.53_445.1884m/z		445.188	1	4.52535	0.492033	29	0.777895	2.08434	DENV	Ctrl	100 - 32.5 - 7.39	73186.8	11.29	31157	34780.9	33582.5	41753.8	34289.1	64179.1	136721	45190.1	40813.8	79029.7	33685.8	29465.4	36144.1	41896.7	29697.7	65605	177945	43129	36265.8	73366.6	x	x	x	x	HMDB0006766	Estriol-16-Glucuronide	M-H2O-H	C24H32O9	43	25	3.42305	93.8056	http://nonlinear.com/redirect/outbound?p=hmdb&param=HMDB0006766	0.0203661	4.70688
	5.99_365.2301m/z		365.23	1	5.9874	0.17775	68	0.777895	2.06588	DENV	Ctrl	100 - 23.8 - 19.2	24004.8	29.52	8280.01	13470.7	8888.82	16569.7	10889.1	18115.6	18705.2	24492	13663.4	45047.8	8952.03	11411.9	9566.85	16626.4	9431	18518.1	24345	23374.9	12140.8	41819.7	x	x	x	x	HMDB0038694	Crispane	M+FA-H	C20H32O3	38.6	16.8	-9.98985	87.2797	http://nonlinear.com/redirect/outbound?p=hmdb&param=HMDB0038694	0.0233083	2.67156
	6.39_363.2098m/z		363.21	1	6.39378	0.192933	4	0.777895	2.06191	DENV	Ctrl	100 - 17.8	5467.33	37.48	2124.12	3052.78	1659.6	4185.78	2235.66	3943.76	4243.44	6828.6	3852.65	8468.2	2296.52	2586.22	1786.19	4200.1	1936.3	4031.38	5522.89	6517.14	3423.34	7861.38	x	x	x	x	HMDB0240273	Pyrvinium	M-H2O-H	C26H28N3+	39.9	13.8	-1.74062	87.8096	http://nonlinear.com/redirect/outbound?p=hmdb&param=HMDB0240273	0.0130012	1.3637
	2.74_243.1677m/z		243.168	1	2.74143	0.114217	17	0.777895	2.05646	DENV	Ctrl	100 - 9.02	2940.43	31.17	2750.46	808.553	1116.13	1126	1348.09	2350.76	2834.58	2751.91	2247.71	4517.18	2973.69	684.982	1201.27	1129.85	1167.57	2402.99	3689.25	2626.39	1997.24	4193.48	x	x	x	x	HMDB0028932	Leucyl-Isoleucine	M-H	C12H24N2O3	37	6.66	-15.1963	94.173	http://nonlinear.com/redirect/outbound?p=hmdb&param=HMDB0028932	0.0113808	1.00799
	4.43_445.1886m/z		445.189	1	4.43255	0.121367	29	0.777895	2.01888	DENV	Ctrl	100 - 27.1 - 16.6	44253.6	23.06	19321.8	20234.6	21865.9	30539.1	17638	46164.8	71086.1	26873.5	21048.7	56095.1	20890	17142.1	23533.8	30643.6	15276.2	47190.4	92519.5	25647.8	18703.1	52075.5	x	x	x	x	HMDB0010353	15-Hydroxynorandrostene-3,17-dione glucuronide	M-H2O-H	C24H32O9	48.6	56.1	3.94441	91.3197	http://nonlinear.com/redirect/outbound?p=hmdb&param=HMDB0010353	0.035151	3.68321
	6.76_403.2468m/z		403.247	1	6.76468	0.135633	17	0.777895	2.01365	DENV	Ctrl	100 - 17.1	15862	30.65	7631.63	8304.95	5359.76	11692.2	6397.76	14266.3	21304.7	11950.7	25298.5	6489.83	8251.03	7035.7	5768.6	11732.2	5541.07	14583.2	27728.4	11405.6	22479.4	6024.78	x	x	x	x	HMDB0060114	24,25,26,27-Tetranor-23-oxo-hydroxyvitamin D3	M+FA-H	C23H34O3	54.5	88.8	-6.0983	90.4204	http://nonlinear.com/redirect/outbound?p=hmdb&param=HMDB0060114	0.0492606	2.17928
	7.21_471.2413m/z		471.241	1	7.21392	0.264333	13	0.777895	1.95819	DENV	Ctrl	100 - 28 - 11.9 - 3.21	234947	25.28	114821	123625	159543	126950	74971.1	240006	427908	229171	169808	107843	124140	104731	171713	127385	64932.2	245338	556928	218718	150886	100115	x	x	x	x	HMDB0002522	Chenodeoxycholic acid sulfate	M-H	C24H40O7S	38.9	0	-1.94017	96.9035	http://nonlinear.com/redirect/outbound?p=hmdb&param=HMDB0002522	0.0483446	8.04037
	5.57_365.2226m/z		365.223	1	5.56605	0.08495	5	0.777895	1.87085	DENV	Ctrl	100 - 13.6	3964.24	12.47	1916.58	2318.75	1778.4	2398.76	2182.25	2504.19	3541.15	3462.61	2751.9	7561.36	2072.13	1964.38	1914.06	2406.97	1890.04	2559.83	4608.85	3304.68	2445.25	7019.53	x	x	x	x	HMDB0033523	(-)-Pyrifolidine	M-H2O-H	C23H32N2O3	38.6	8.49	-2.16925	87.1283	http://nonlinear.com/redirect/outbound?p=hmdb&param=HMDB0033523	0.0269763	1.00411
	2.87_259.1505m/z		259.15	1	2.87013	0.0930167	13	0.777895	1.852	DENV	Ctrl	100 - 11.3 - 0.222	6776.81	23.56	3472.23	2986.4	2741.32	4724.56	4371.4	5609.3	4688.59	6628.17	7665.68	9292.32	3754.04	2529.99	2950.42	4740.72	3786.06	5733.92	6102.27	6325.85	6811.47	8626.45	x	x	x	x	HMDB0035028	(x)-2-Heptanol glucoside	M-H2O-H	C13H26O6	38.8	15.4	-16.5822	95.3026	http://nonlinear.com/redirect/outbound?p=hmdb&param=HMDB0035028	0.00493329	1.51849
	5.59_413.1958m/z		413.196	1	5.59462	0.1285	24	0.777895	1.84244	DENV	Ctrl	100 - 19.7	11038.8	7.98	5759.64	6576.96	5402.8	6375.87	5841.68	10024.3	17207.4	11193.8	7002.42	9765.91	6227.1	5571.8	5814.92	6397.68	5059.45	10247	22395.7	10683.2	6222.12	9066.1	x	x	x	x	HMDB0038787	Melleolide B	M-H2O-H	C24H32O7	40	12.6	-2.78233	90.6386	http://nonlinear.com/redirect/outbound?p=hmdb&param=HMDB0038787	0.00505557	1.86329
	5.22_283.0890m/z		283.089	1	5.21678	0.627183	24	0.777895	1.81874	DENV	Ctrl	100 - 9.15	12164.3	39.19	9992.59	7547.4	5909.49	7174.08	2818.19	9777.42	21132.8	11123.2	8400.07	10388.2	10803.6	6393.93	6360.26	7198.62	2440.82	9994.64	27504.7	10615.8	7464.02	9643.77	x	x	x	x	HMDB0029451	gamma-Glutaminyl-4-hydroxybenzene	M+FA-H	C11H14N2O4	35.8	2.69	-19.2711	95.1854	http://nonlinear.com/redirect/outbound?p=hmdb&param=HMDB0029451	0.0481501	1.76989
	2.40_229.1521m/z		229.152	1	2.39932	0.08585	4	0.777895	1.79396	DENV	Ctrl	100 - 9.95	3343.02	24.23	2858.3	1360.86	1425.77	1718.33	1954.17	2797.27	3225.76	3319.12	2667.37	4705.57	3090.29	1152.88	1534.53	1724.21	1692.5	2859.42	4198.37	3167.73	2370.13	4368.38	x	x	x	x	HMDB0029130	Valyl-Isoleucine	M-H	C11H22N2O3	37.7	8.75	-16.1114	96.0272	http://nonlinear.com/redirect/outbound?p=hmdb&param=HMDB0029130	0.0068714	1.03149
	2.08_201.1208m/z		201.121	1	2.0779	0.142483	5	0.777895	1.74835	DENV	Ctrl	100 - 12	3491.71	24.41	2811.23	1601.56	1728.56	2076.62	1767.78	3212.07	3042.41	3508.29	2666.42	5029.36	3039.39	1356.79	1860.41	2083.73	1531.06	3283.43	3959.74	3348.27	2369.3	4668.97	x	x	x	x	HMDB0028690	Alanyl-Isoleucine	M-H	C9H18N2O3	37.4	7.19	-17.971	97.9209	http://nonlinear.com/redirect/outbound?p=hmdb&param=HMDB0028690	0.00529842	1.03397
	0.79_150.0501n	150.05	195.047	1	0.794333	0.1003	54	0.777895	1.66561	DENV	Ctrl	100 - 1.26	12246.4	27.96	12432.5	5266.34	7179.41	6402.63	5481.79	14929.7	12821.6	7527.05	10147.4	15806.4	13441.5	4461.48	7727.05	6424.54	4747.76	15261.4	16687.5	7183.73	9016.62	14673.8	x	x	x	x	HMDB0094694	beta-Arabinose	M-H2O-H, M+FA-H	C5H10O5	39.9	23.1	-18.1168	94.751	http://nonlinear.com/redirect/outbound?p=hmdb&param=HMDB0094694	0.033746	1.74
	8.08_313.2360m/z		313.236	1	8.08407	0.142067	21	0.777895	1.6551	DENV	Ctrl	100 - 20.6	90709.9	21.85	65247	40623.2	68333.2	53945.5	45882.8	72449.2	75443.2	81761.2	152186	71709.8	70542.6	34414.7	73545.6	54130.1	39738.9	74058.8	98190.3	78032	135228	66571.2	x	x	x	x	HMDB0004704	9,10-DHOME	M-H	C18H34O4	49.3	58.1	-7.66895	97.0751	http://nonlinear.com/redirect/outbound?p=hmdb&param=HMDB0004704	0.0253813	4.57292
	3.85_685.2584m/z		685.258	1	3.84747	0.0932	2	0.777895	1.6544	DENV	Ctrl	100 - 17.8	5808.74	16.29	5389.24	2791.99	2746.62	2875.69	3751.92	5878.31	7250.75	5456.51	4636.31	5821.81	5826.64	2365.29	2956.13	2885.53	3249.52	6008.91	9436.95	5207.63	4119.67	5404.63	x	x	x	x	CSID15236	OXOLAMINE PHOSPHATE	2M-H	C14H22N3O5P	37.4	0	9.13739	96.9423	http://nonlinear.com/redirect/outbound?p=chemspider&param=15236	0.0072382	1.30251
	12.46_483.3153m/z		483.315	1	12.4618	0.791933	10	0.777895	1.64276	DENV	Ctrl	100 - 18.2	17342.4	22.48	13153.2	11758.9	7663.39	14117.6	6091.04	15767.8	22596.8	20044	12919.1	15384.3	14220.7	9961.8	8247.95	14165.9	5275.43	16118.1	29410	19129.7	11479.5	14281.9	x	x	x	x	HMDB0034704	22-Deoxoisocucurbitacin D	M-H2O-H	C30H46O6	40.1	24.6	7.32684	83.902	http://nonlinear.com/redirect/outbound?p=hmdb&param=HMDB0034704	0.025213	2.14768
	3.80_687.2721m/z		687.272	1	3.79732	0.878367	1	0.777895	1.58396	DENV	Ctrl	100 - 53.9 - 32.6 - 20.2	100132	17.14	87450.6	58954.5	52095.2	50201.3	67379.8	99885.5	111215	98821.3	72911.8	117825	94548.3	49944.5	56069	50373.1	58357.4	102105	144748	94313.9	64787	109382	x	x	x	x	HMDB0029117	Tyrosyl-Tyrosine	2M-H	C18H20N2O5	38.5	40.7	7.11632	59.996	http://nonlinear.com/redirect/outbound?p=hmdb&param=HMDB0029117	0.00709498	5.25483
	4.59_415.1824m/z		415.182	1	4.5889	0.142067	9	0.777895	1.55618	DENV	Ctrl	100 - 21.3	22170.5	18.1	15268.1	18273.9	12370.1	13286.4	12035.4	25314.6	26490.8	19485.8	15747.7	23813.6	16507.3	15481.1	13313.7	13331.8	10423.8	25877	34478.1	18597	13992.9	22107.2	x	x	x	x	HMDB0002759	Androsterone sulfate	M+FA-H	C19H30O5S	40.1	16.4	7.50436	92.4479	http://nonlinear.com/redirect/outbound?p=hmdb&param=HMDB0002759	0.00770707	2.41156
	5.47_413.1935m/z		413.193	1	5.46662	0.0787167	24	0.777895	1.53518	DENV	Ctrl	100 - 19.5 - 31.2	16156.1	14.92	9492.23	11699.2	9045.58	12664	9718.56	16191.7	25639.8	12014.5	12240.1	14694.2	10262.6	9911.21	9735.57	12707.3	8417.21	16551.4	33370.6	11466.5	10876.2	13641.2	x	x	x	x	HMDB0038787	Melleolide B	M-H2O-H	C24H32O7	39.9	29.8	-8.05549	78.4773	http://nonlinear.com/redirect/outbound?p=hmdb&param=HMDB0038787	0.0314651	1.80582
	6.42_287.2197m/z		287.22	1	6.41518	0.142967	60	0.777895	1.52608	DENV	Ctrl	100 - 15.9 - 0.44	9165.18	19.46	3958.27	6405.58	8442.11	5606.03	5616.47	9156.03	6821.25	8675.54	11801.1	9371.99	4279.54	5426.61	9086.07	5625.21	4864.4	9359.44	8877.95	8279.84	10486	8700.41	x	x	x	x	HMDB0072870	MG(0:0/i-13:0/0:0)	M-H	C16H32O4	37	0	-10.7446	96.6198	http://nonlinear.com/redirect/outbound?p=hmdb&param=HMDB0072870	0.0197047	1.46941
	4.97_413.1642m/z		413.164	1	4.96743	0.107083	31	0.777895	1.51757	DENV	Ctrl	100 - 20.4	11503.4	8.69	8426.91	7929.31	6995.64	7703.07	6845.75	11018.1	18297	10233.5	8037.32	9930.89	9110.86	6717.47	7529.27	7729.43	5929.08	11262.9	23813.8	9766.69	7141.7	9219.26	x	x	x	x	CSID113947	Salvinorin A	M-H2O-H	C23H28O8	42.8	31.6	8.4436	91.958	http://nonlinear.com/redirect/outbound?p=chemspider&param=113947	0.0281442	1.51083
	2.39_1035.3829m/z		1035.38	1	2.39218	0.506717	3	0.777895	1.51003	DENV	Ctrl	100 - 73.3	14723.9	13.5	8841.63	10206.9	9108.52	8735.78	11861	20047	17766.2	9671.77	13210.9	12923.7	9559.24	8646.96	9803.31	8765.66	10272.8	20492.4	23122.9	9230.63	11738.7	11997.6	x	x	x	x	HMDB0040723	(-)-Gossypol	2M-H	C30H30O8	34.2	0	2.00197	73.3415	http://nonlinear.com/redirect/outbound?p=hmdb&param=HMDB0040723	0.0253538	1.78073
	4.68_415.1779m/z		415.178	1	4.6817	0.0785167	25	0.777895	1.50374	DENV	Ctrl	100 - 15	8111.22	12.15	5761.4	5784.51	4855.26	6031.44	4537.58	7862.88	12239.7	7785.82	5617.82	7049.93	6229	4900.46	5225.62	6052.08	3929.98	8037.57	15930.1	7430.7	4991.81	6544.75	x	x	x	x	HMDB0034899	1,1'-Ethylidenebistryptophan	M-H2O-H	C24H26N4O4	39.7	13.2	0.81057	86.4931	http://nonlinear.com/redirect/outbound?p=hmdb&param=HMDB0034899	0.0251309	1.28806
	3.84_327.0851m/z		327.085	1	3.84033	0.214567	83	0.777895	1.499	DENV	Ctrl	100 - 21.9	35856.2	11.92	25498.1	22920.2	22337.5	20816.7	28028.1	30938.5	31404.5	35824.9	51767.1	29345.9	27567.5	19417.3	24041.4	20887.9	24275	31625.9	40873.3	34190.9	45998.5	27243.1	x	x	x	x	CSID4512919	7-Hydroxy-3-(4-methoxyphenyl)-4-methylcoumarin	M+FA-H	C17H14O4	44.5	36	-8.08766	95.2868	http://nonlinear.com/redirect/outbound?p=chemspider&param=4512919	0.00998359	2.81685
	5.22_363.2152m/z		363.215	1	5.22392	0.0928	75	0.777895	1.49651	DENV	Ctrl	100 - 23	6037.04	19.94	5263.64	3900.94	3213.38	4493.55	3298.89	6025.75	6634.1	7221.31	4040.41	6263.6	5690.85	3304.76	3458.49	4508.92	2857.15	6159.62	8634.37	6891.94	3590.18	5814.76	x	x	x	x	HMDB0006754	11b,21-Dihydroxy-3,20-oxo-5b-pregnan-18-al	M-H	C21H32O5	41.3	17.4	-6.81127	96.5917	http://nonlinear.com/redirect/outbound?p=hmdb&param=HMDB0006754	0.0189153	1.17953
	4.45_431.2023m/z		431.202	1	4.45397	0.477767	4	0.777895	1.45979	DENV	Ctrl	100 - 34.2 - 4.79	69711.3	10.62	50907.9	50895.3	47260	50595.1	39113.7	58513.9	111598	53566.3	63144.8	61733.6	55039.7	43117	50865	50768.2	33876.2	59813.8	145246	51123	56108.4	57309.9	x	x	x	x	HMDB0014846	Sufentanil	M+FA-H	C22H30N2O2S	41.2	19.1	3.25567	90.628	http://nonlinear.com/redirect/outbound?p=hmdb&param=HMDB0014846	0.0384987	3.48592
	5.25_365.2283m/z		365.228	1	5.25247	0.135633	6	0.777895	1.44902	DENV	Ctrl	100 - 22.4 - 27.3 - 4.56	37294.8	16.26	26736.4	27455.9	20618	31239.6	22640	35663.8	38765.5	39829.8	24860.7	47354.2	28906.3	23259.8	22190.7	31346.5	19608.4	36456.1	50453.8	38013.2	22090.4	43960.8	x	x	x	x	HMDB0014453	Ibutilide	M-H2O-H	C20H36N2O3S	37.4	7.09	3.93804	84.5386	http://nonlinear.com/redirect/outbound?p=hmdb&param=HMDB0014453	0.0238448	2.78375
	4.85_415.1786m/z		415.179	1	4.85322	0.214367	24	0.777895	1.41852	DENV	Ctrl	100 - 25.9	39980.8	12.77	31568.3	26216.2	28522.9	31481.5	23136	37255	58131.8	33301.9	27791.3	43424.1	34130.4	22209.6	30698.6	31589.3	20038	38082.7	75659.4	31782.9	24694.4	40312.4	x	x	x	x	HMDB0038786	10-Hydroxymelleolide	M-H	C23H28O7	43.9	30.3	5.62991	95.7382	http://nonlinear.com/redirect/outbound?p=hmdb&param=HMDB0038786	0.0468254	2.61054
	8.41_499.3093m/z		499.309	1	8.41267	0.428083	49	0.777895	1.39631	DENV	Ctrl	100 - 27.4	50878.2	16.45	40390.7	37722.4	29997.9	45127.1	28950.3	47905.9	63881.3	46691.1	42143.2	53769.2	43668.9	31957.3	32286.2	45281.5	25073.7	48970.2	83142.4	44561.5	37447.1	49916.2	x	x	x	x	HMDB0035117	(3beta,6beta)-Furanoeremophilane-3,6-diol	2M-H	C15H22O3	45	41.2	5.61111	90.0518	http://nonlinear.com/redirect/outbound?p=hmdb&param=HMDB0035117	0.0161565	3.15464
	6.53_467.2164m/z		467.216	1	6.52962	0.106583	3	0.777895	1.38845	DENV	Ctrl	100 - 20.5	8798.76	6.75	6573.92	6696.75	6387.99	6422.72	5604.09	7349.7	12299.7	8509.43	7669.06	8165.94	7107.47	5673.28	6875.26	6444.69	4853.67	7512.99	16008.2	8121.3	6814.48	7580.78	x	x	x	x	HMDB0032960	1-Octen-3-yl primeveroside	M+FA-H	C19H34O10	37.5	0	7.07587	95.5842	http://nonlinear.com/redirect/outbound?p=hmdb&param=HMDB0032960	0.0123109	1.26886
	8.49_509.2610m/z		509.261	1	8.4912	0.170867	7	0.777895	1.38305	DENV	Ctrl	100 - 12.8	12294.9	6.71	8812.57	9865.98	8410.58	8948.94	8410.48	9913.06	14270.7	10292.8	11729.1	15269.1	9527.81	8358.16	9052.13	8979.56	7284.28	10133.3	18573.4	9823.3	10422.1	14174.9	x	x	x	x	CSID170768	nebramycin 5'	M-H	C19H38N6O10	39.9	19.3	6.54697	87.5041	http://nonlinear.com/redirect/outbound?p=chemspider&param=170768	0.00905954	1.54601
	7.24_529.2814m/z		529.281	1	7.24247	0.08565	15	0.777895	1.37608	DENV	Ctrl	100 - 28.8 - 10.4 - 2.01	85764.9	20.44	54603.9	70326.7	59666.7	43293	83736.2	77538.6	115454	69417.1	83410.5	83004.2	59035.6	59578.6	64218	43441.1	72523.6	79261.2	150265	66250.9	74115.8	77056.3	x	x	x	x	CSID390429	Cymarin	M-H2O-H	C30H44O9	52.2	68.3	1.24302	94.0633	http://nonlinear.com/redirect/outbound?p=chemspider&param=390429	0.0473264	3.72156
	3.46_461.1820m/z		461.182	1	3.4621	0.1142	12	0.777895	1.37314	DENV	Ctrl	100 - 35.4 - 38.8 - 22.6 - 26.6	25801	1.77	18810.3	19310.6	18480.8	18515.9	18831.3	25384.6	35133.8	20267.5	18639.7	29579.6	20337	16359.4	19890.5	18579.2	16309.7	25948.5	45727.1	19343	16562.7	27460	x	x	x	x	HMDB0035864	13-Hydroxy-5'-O-methylmelledonal	M-H	C24H30O9	39.5	38.7	0.663178	59.3824	http://nonlinear.com/redirect/outbound?p=hmdb&param=HMDB0035864	0.0388426	2.05377
	4.79_583.1864m/z		583.186	1	4.78897	0.107283	21	0.777895	1.36568	DENV	Ctrl	100 - 48.9	8418.16	18.81	6371.66	5120.35	7304.71	4808.71	7214.92	7544.67	10825.8	6212.21	8173.21	9334.87	6888.8	4337.81	7861.91	4825.17	6248.81	7712.29	14090	5928.86	7262.45	8665.95	x	x	x	x	HMDB0015067	Tipranavir	M-H2O-H	C31H33F3N2O5S	36.5	3.51	-3.27806	82.8641	http://nonlinear.com/redirect/outbound?p=hmdb&param=HMDB0015067	0.042282	1.17681
	8.54_424.2458m/z		424.246	1	8.54142	0.199667	9	0.777895	1.35982	DENV	Ctrl	100 - 22.4	16972.4	13.32	8976.08	13211.7	10130.6	15489.4	14598.7	16182.9	14588.3	15889.9	17700.8	20499.9	9704.59	11192.6	10903.3	15542.4	12643.9	16542.5	18986.9	15165.2	15728.4	19030.9	x	x	x	x	HMDB0000277	Sphingosine 1-phosphate	M+FA-H	C18H38NO5P	41.7	16.2	-3.13288	95.8295	http://nonlinear.com/redirect/outbound?p=hmdb&param=HMDB0000277	0.0282683	1.72928
	4.70_429.1888m/z		429.189	1	4.69597	0.114433	25	0.777895	1.34467	DENV	Ctrl	100 - 14.5	8929.76	3.42	6353.87	6876.69	6591.52	6515.92	6866.18	7794.42	11696.7	7668.3	8984.63	8504.74	6869.57	5825.72	7094.32	6538.22	5946.77	7967.59	15223.4	7318.54	7983.45	7895.3	x	x	x	x	HMDB0010349	Estradiol-17alpha 3-D-glucuronoside	M-H2O-H	C24H32O8	38.4	13.2	-6.85444	86.5006	http://nonlinear.com/redirect/outbound?p=hmdb&param=HMDB0010349	0.00641951	1.26746
	1.99_329.1636m/z		329.164	1	1.99272	0.192233	37	0.777895	1.32101	DENV	Ctrl	100 - 62.1 - 33.6	9459.63	13.74	8119.54	7875.53	6805.04	7352.72	5651.67	8526.71	8022.67	7931.41	10041	12776.4	8778.54	6671.91	7324.12	7377.88	4894.89	8716.14	10441.6	7569.64	8922.09	11860.8	x	x	x	x	CSID92141	4-Chloroprogesterone	M-H2O-H	C21H29ClO2	34	6.48	-11.9695	76.2171	http://nonlinear.com/redirect/outbound?p=chemspider&param=92141	0.0409269	1.16971
	3.71_703.2689m/z		703.269	1	3.71143	0.114617	4	0.777895	1.30487	DENV	Ctrl	100 - 52.4 - 60.6 - 38.1 - 31.8 - 24.1	18075	12.93	14943.2	14238.9	12226.6	11824.5	16026.7	17342.3	24073.1	16039.6	15414.8	17505.2	16156.1	12062.7	13159.3	11865	13880.7	17727.6	31331.4	15308	13697.1	16250.8	x	x	x	x	HMDB0032759	Moschamine	2M-H	C20H20N2O4	29.2	17.7	-11.9165	41.1644	http://nonlinear.com/redirect/outbound?p=hmdb&param=HMDB0032759	0.0291306	1.61552
	5.48_399.1849m/z		399.185	1	5.4809	0.177967	24	0.777895	1.29196	DENV	Ctrl	100 - 12.2	9994.03	16.86	9607.97	7945.8	6888.28	8438.54	5797.12	9980.25	12842.2	9616.14	8977.09	8554.5	10387.8	6731.44	7413.71	8467.41	5020.86	10202	16714.2	9177.54	7976.74	7941.5	x	x	x	x	HMDB0029838	Harmalol	2M-H	C12H12N2O	39.8	7.79	5.70902	97.5955	http://nonlinear.com/redirect/outbound?p=hmdb&param=HMDB0029838	0.0482688	1.15843
	5.69_1039.4461m/z		1039.45	1	5.69455	2.70377	7	0.777895	1.28275	DENV	Ctrl	100 - 89.7	59079.4	2.96	43898.8	45635.1	46948.5	46472.2	47329.8	54257.9	80232.1	54397.6	44957.7	61551.9	47461.8	38660.7	50529.7	46631.2	40992.1	55463.3	104423	51916.5	39947.9	57141.2	x	x	x	x	HMDB0030142	Physalolactone C	2M-H	C28H37ClO7	34.3	25.7	7.46563	54.3835	http://nonlinear.com/redirect/outbound?p=hmdb&param=HMDB0030142	0.0437054	2.75384
	3.40_1031.4030m/z		1031.4	1	3.39787	3.08175	1	0.777895	1.23609	DENV	Ctrl	100 - 92.6 - 95.9	100367	2.72	77674	82632.2	83241.2	80560.6	81881.3	91424.8	123559	89473.4	81425.8	115954	83978.2	70003.5	89590.8	80836.2	70917	93455.9	160814	85392.4	72352.3	107645	x	x	x	x	HMDB0010147	PIP3(16:0/16:0)	M-H2O-H	C41H82O22P4	30.9	3.95	-3.83429	54.9629	http://nonlinear.com/redirect/outbound?p=hmdb&param=HMDB0010147	0.039727	3.40225
	2.00_630.2024m/z		630.202	1	1.99985	0.6916	1	0.777895	1.23494	DENV	Ctrl	100 - 85.3	24671.1	7.59	20749.7	21614.6	18786.7	17995.6	20740.8	24601.5	27566.6	21277.9	20921.9	28987.4	22433.8	18311.3	20219.8	18057.2	17963.5	25148	35878.3	20307.4	18590.5	26910.2	x	x	x	x	CSID9425680	Elagolix	M-H	C32H30F5N3O5	36.2	12.6	-1.49196	70.246	http://nonlinear.com/redirect/outbound?p=chemspider&param=9425680	0.0250164	1.75003
	6.37_349.1991m/z		349.199	1	6.36522	0.1499	87	0.777895	1.23418	DENV	Ctrl	100 - 18.1	9553.82	6.15	6141.37	8157.68	9377.95	6738.66	8289.56	8619.91	9857.91	9465.37	10186.2	9639.72	6639.81	6910.94	10093.3	6761.71	7179.55	8811.42	12830.2	9033.64	9051.11	8948.96	x	x	x	x	CSID4445307	(4R,5S,6S,7S,9R,11E,13E,16R)-7-Ethyl-4,6-dihydroxy-5-methoxy-9,16-dimethyloxacyclohexadeca-11,13-diene-2,10-dione	M-H2O-H	C20H32O6	40.6	18.3	-8.10819	93.5276	http://nonlinear.com/redirect/outbound?p=chemspider&param=4445307	0.0266598	1.10581
	4.41_479.1635m/z		479.163	1	4.41115	0.214383	7	0.777895	1.23202	DENV	Ctrl	100 - 55.3	12095.3	5.22	9794.42	10009.2	8959.27	10024.9	10299.6	10907.7	14281.4	11190.7	10960.6	13136.2	10589.4	8479.49	9642.68	10059.2	8920.48	11150	18587.5	10680.3	9739.25	12194.9	x	x	x	x	CSID4445173	Flupentixol	M+FA-H	C23H25F3N2OS	35.6	4.58	3.01096	76.7387	http://nonlinear.com/redirect/outbound?p=chemspider&param=4445173	0.00949635	1.26967
	1.64_335.0660m/z		335.066	1	1.63562	0.306433	10	0.777895	1.22513	DENV	Ctrl	100 - 41.9	10762	12.42	8182.69	8945.68	7339.22	8389.3	11065.2	10962	9242.71	9553.38	11762.1	12289.9	8846.81	7578.51	7899.05	8418	9583.52	11205.5	12029.5	9117.64	10451.4	11409.2	x	x	x	x	CSID388581	[3-(3,4-methylenedioxyphenyl)-2-(mercaptomethyl)-1-oxoprolyl]glycine	M-H2O-H	C15H18N2O6S	39.5	33	-13.2017	78.5474	http://nonlinear.com/redirect/outbound?p=chemspider&param=388581	0.0474932	1.08689
	1.71_586.1752m/z		586.175	1	1.71433	0.556483	1	0.777895	1.22007	DENV	Ctrl	100 - 80 - 51.2	26747.9	7.14	22136.2	23870	20602.9	20111.6	22895	25695.1	29332.7	22936	23753.7	32022	23932.9	20221.9	22174.5	20180.4	19829.2	26265.9	38176.9	21889.9	21106.8	29727.3	x	x	x	x	CSID5036865	Domperidone Maleate	M+FA-H	C26H28ClN5O6	32.1	0	7.79184	68.9688	http://nonlinear.com/redirect/outbound?p=chemspider&param=5036865	0.0261595	1.76159
	2.56_729.2703m/z		729.27	1	2.56298	1.16292	2	0.777895	1.21932	DENV	Ctrl	100 - 84.9	45484.6	3.88	36792.1	38784.6	38442.4	35155.2	37341.6	40426	48838.1	39687.1	39986.3	58485.6	39778.2	32857.2	41374.8	35275.4	32341.4	41324.1	63563.4	37876.9	35530.5	54294.7	x	x	x	x	CSID167280	Gastrin tetrapeptide	M-H	C37H42N6O8S	33.7	0	-1.27678	70.0426	http://nonlinear.com/redirect/outbound?p=chemspider&param=167280	0.0442456	2.18326
	2.44_687.2808m/z		687.281	1	2.44233	0.862717	6	0.777895	1.21559	DENV	Ctrl	100 - 82.8	45932.7	3.56	36321	37058.9	39818	38318.1	37416.4	41521.4	48828.3	43890	37969.6	57454.2	39268.9	31395.2	42855.3	38449.2	32406.2	42443.8	63550.7	41888.1	33738.5	53337.1	x	x	x	x	HMDB0060896	N-Desmethylritonavir	M-H2O-H	C36H46N6O5S2	41.9	43.7	2.13582	68.5399	http://nonlinear.com/redirect/outbound?p=hmdb&param=HMDB0060896	0.0348948	2.23129
	2.97_700.2801m/z		700.28	1	2.97007	0.734033	1	0.777895	1.21202	DENV	Ctrl	77.9 - 100 - 21.5 - 28.4	49280.8	2.82	39958.5	41316.7	40366	39381.7	42278.3	47377.8	57884.4	46860.7	41984.8	52296.5	43201.6	35002.3	43445.1	39516.5	36617.1	48430.4	75337.3	44723.3	37306.3	48549.1	x	x	x	x	CSID8028321	CP 424391-18	M+FA-H	C32H41N5O10	28.8	0	-5.20013	50.1961	http://nonlinear.com/redirect/outbound?p=chemspider&param=8028321	0.0101047	2.46682
	4.08_431.1923m/z		431.192	1	4.08255	0.698967	9	0.777895	1.20988	DENV	Ctrl	100 - 33 - 1.4	72627.4	4.86	61627.5	62786.5	55462	61347	58920.4	69307.2	91437.8	62699	61333.8	78359.2	66629.3	53190.8	59692.6	61556.9	51030.7	70847	119008	59839.3	54499.2	72744.1	x	x	x	x	CSID8109103	Cediranib	M-H2O-H	C25H27FN4O3	45.8	43.2	7.54202	94.3048	http://nonlinear.com/redirect/outbound?p=chemspider&param=8109103	0.0486895	2.71032
	2.81_700.2788m/z		700.279	1	2.81282	1.09868	1	0.777895	1.20667	DENV	Ctrl	85.6 - 100 - 77.8	75788.7	5.37	59154.7	67939.8	63938.9	60729.7	62277.3	68970.9	83241.1	72658.3	63442.6	90630.4	63955.8	57556.5	68816.2	60937.5	53938.1	70503.2	108339	69344.3	56373	84136	x	x	x	x	CSID8028321	CP 424391-18	M+FA-H	C32H41N5O10	27.8	0	-7.19192	47.1149	http://nonlinear.com/redirect/outbound?p=chemspider&param=8028321	0.0299197	2.86536
	2.78_729.2802m/z		729.28	1	2.77712	1.87602	42	0.777895	1.16988	DENV	Ctrl	100 - 85.9	70875.8	4.4	56596	60028.5	63511.2	60311.3	62471.5	65649.5	81396.7	66043.3	61634.7	79654.7	61189.5	50854.3	68355.8	60517.6	54106.3	67108	105939	63031	54766.5	73946.8	x	x	x	x	HMDB0129798	6-(4-{5,7-dihydroxy-3-[(2Z)-4-hydroxy-3-(4-methylpent-3-en-1-yl)but-2-en-1-yl]-6-(3-methylbut-2-en-1-yl)-4-oxo-3,4-dihydro-2H-1-benzopyran-2-yl}-3-hydroxyphenoxy)-3,4,5-trihydroxyoxane-2-carboxylic acid	M+FA-H	C36H44O13	40.2	36.9	5.50267	70.408	http://nonlinear.com/redirect/outbound?p=hmdb&param=HMDB0129798	0.034582	2.53157
	2.09_388.1312m/z		388.131	1	2.09217	0.734433	8	0.777895	1.16848	DENV	Ctrl	80.7 - 100	31098.9	4.57	27830.2	27004.5	25101.6	25567.6	27570.8	30809.8	35949.6	27728.8	30614.1	30392.3	30089	22877.4	27016.3	25655.1	23879	31494.3	46788.9	26464.1	27202.7	28214.5	x	x	x	x	HMDB0014958	Tadalafil	M-H	C22H19N3O4	31.2	6.92	2.39077	51.8645	http://nonlinear.com/redirect/outbound?p=hmdb&param=HMDB0014958	0.01115	1.77543
	2.93_756.2911m/z		756.291	1	2.92725	2.3468	1	0.777895	1.15964	DENV	Ctrl	63.4 - 100 - 89.8	126532	3.37	103491	110122	113652	109832	108470	119272	142495	119033	110868	140990	111890	93291.7	122322	110207	93945.3	121922	185459	113604	98513.9	130887	x	x	x	x	CSID4445613	N-{[(2S,3R)-7-Carboxy-3-(2-carboxyethyl)-12-ethyl-2,8,13,18-tetramethyl-17-vinyl-2,3-dihydro-5-porphyrinyl]acetyl}-L-aspartic acid	M+FA-H	C38H41N5O9	27.3	0	3.45865	40.4862	http://nonlinear.com/redirect/outbound?p=chemspider&param=4445613	0.0255914	3.36027
	2.91_771.2978m/z		771.298	1	2.90583	0.86985	4	0.777895	1.15404	DENV	Ctrl	100 - 90.1 - 89.6 - 77.3	81340.4	2.21	67852.4	70373.8	71732.2	71042.1	71414.9	76170.8	89217.2	77579.2	71072	92662.9	73359.4	59618.5	77203.9	71285.2	61852.2	77863.1	116117	74040.8	63152.3	86022.8	x	x	x	x	HMDB0040155	Paradisin C	M+FA-H	C42H46O11	29.7	10.5	-6.11376	45.2493	http://nonlinear.com/redirect/outbound?p=hmdb&param=HMDB0040155	0.0266299	2.64539
	2.55_777.2968m/z		777.297	1	2.5487	1.48323	4	0.777895	1.15397	DENV	Ctrl	100 - 94.3	57348	3.29	46920.4	50499.8	50936.7	49553.7	50570.6	53355.7	65305.9	53947.2	50357.1	63774.2	50728.6	42781.9	54822.2	49723.3	43799	54541.1	84996.5	51486.6	44745.7	59204.3	x	x	x	x	HMDB0015286	Gemifloxacin	2M-H	C18H20FN5O4	35.9	24.1	5.38514	61.5446	http://nonlinear.com/redirect/outbound?p=hmdb&param=HMDB0015286	0.0336878	2.18768
	3.75_683.2603m/z		683.26	1	3.75448	1.54095	9	0.777895	1.15349	DENV	Ctrl	100 - 83.9	66922.7	3.02	55669.8	59220	60002.5	56874.9	58319.4	63779	76789.6	65501.9	58953.7	69589.2	60188.1	50169.4	64579.5	57069.5	50510.2	65195.9	99942.7	62514.2	52384.3	64602.5	x	x	x	x	HMDB0013682	Coniferin	2M-H	C16H22O8	31	0	6.80794	62.8849	http://nonlinear.com/redirect/outbound?p=hmdb&param=HMDB0013682	0.0169158	2.45602
	2.81_808.3150m/z		808.315	1	2.80568	2.3254	1	0.777895	1.15331	DENV	Ctrl	100 - 99.6	78951.3	2.65	65359.9	68949	70026	69397.1	68550.9	74545.4	92797.6	74734.1	67136.7	85543	70664.6	58411.5	75367.5	69634.5	59371.6	76201.5	120777	71325.3	59655.4	79413.1	x	x	x	x	CSID29368490	aclacinomycin Y	M-H	C42H51NO15	43.2	53.4	-4.47212	67.7073	http://nonlinear.com/redirect/outbound?p=chemspider&param=29368490	0.0472436	2.50086
	3.50_717.2680m/z		717.268	1	3.50493	1.96205	1	0.777895	1.15241	DENV	Ctrl	100 - 86.8	83622.3	3.35	68849.6	73976.5	73917.9	71365.6	74704.3	79082.9	96694.9	77856.9	74949.7	89526.9	74437.6	62670.6	79556.3	71609.7	64701.1	80839.9	125850	74305.8	66597.8	83111.6	x	x	x	x	HMDB0136453	N-[2-hydroxy-2-(4-hydroxy-3-methoxyphenyl)ethyl]-3-(4-hydroxy-3-methoxyphenyl)prop-2-enimidic acid	2M-H	C19H21NO6	32.2	0	2.06399	63.6759	http://nonlinear.com/redirect/outbound?p=hmdb&param=HMDB0136453	0.0254101	2.67068
	2.45_630.2523m/z		630.252	1	2.44948	0.4492	1	0.777895	1.14046	DENV	Ctrl	100 - 90.5	21941.2	2.52	19040.1	19125.1	20072.3	19144.9	18812.5	20360.1	23407.2	21618	19101.9	25219	20585.4	16202.2	21603.4	19210.4	16293.4	20812.5	30464.8	20632	16973.3	23411.8	x	x	x	x	CSID16736543	bluensomycin	M+FA-H	C21H39N5O14	38.9	40.1	8.18632	63.5064	http://nonlinear.com/redirect/outbound?p=chemspider&param=16736543	0.0362041	1.29555
	2.01_752.2821m/z		752.282	1	2.01435	2.50407	1	0.777895	1.13495	DENV	Ctrl	95.8 - 100 - 88.4 - 51	178045	4.47	147314	161141	163980	151800	160140	168121	207322	165779	164789	184215	159270	136513	176488	152319	138697	171856	269832	158218	146426	171015	x	x	x	x	HMDB0035904	Phyllanthusol B	M-H2O-H	C35H49NO18	41.8	72.4	6.43459	43.8163	http://nonlinear.com/redirect/outbound?p=hmdb&param=HMDB0035904	0.0340334	3.62183
	1.76_554.1734m/z		554.173	1	1.7643	0.955717	1	0.777895	1.13366	DENV	Ctrl	97.6 - 100	38521.5	7.02	32075.3	36360.9	32289.7	31297.9	37874.7	38430.7	41558.2	34177.7	38918.7	39522.2	34678.6	30803.9	34752.8	31405	32803.2	39284.5	54088.6	32618.8	34581.9	36690.1	x	x	x	x	HMDB0038329	Dide-O-methyl-4-O-alpha-D-glucopyranosylsimmondsin	M+FA-H	C20H31NO14	32.1	3.76	1.48273	58.3976	http://nonlinear.com/redirect/outbound?p=hmdb&param=HMDB0038329	0.0351944	1.699
	3.10_681.2670m/z		681.267	1	3.09785	0.5984	14	0.777895	1.12943	DENV	Ctrl	100 - 82.7	27470	4.04	23222.5	24911.7	24571.5	23400.7	25503.4	27554.3	30040.9	26783.8	23830.2	29141	25107.2	21104.5	26445.8	23480.8	22088.4	28166.5	39098.6	25562.2	21174.7	27052.8	x	x	x	x	HMDB0011668	6-(alpha-D-Glucosaminyl)-1D-myo-inositol	2M-H	C12H23NO10	34	23.7	14.5161	61.2969	http://nonlinear.com/redirect/outbound?p=hmdb&param=HMDB0011668	0.0268865	1.4388
	1.89_658.2593m/z		658.259	1	1.88565	2.68178	2	0.777895	1.12632	DENV	Ctrl	89.8 - 100 - 4.42 - 1.22	112883	5.35	92897.1	104107	101042	96935.4	106133	104027	128456	105257	107156	119519	100437	88196.6	108750	97267.1	91920.9	106338	167187	100456	95215.1	110954	x	x	x	x	CSID30791243	[N'-{5-[Acetyl(hydroxy-kappaO)amino]pentyl}-N-[5-({4-[(5-aminopentyl)(hydroxy-kappaO)amino]-4-oxobutanoyl}amino)pentyl]-N-(hydroxy-kappaO)succinamidato(3-)]iron	M+FA-H	C25H45FeN6O8	28.8	46.7	-6.08777	4.20728	http://nonlinear.com/redirect/outbound?p=chemspider&param=30791243	0.0408051	2.77971
	4.22_725.2683m/z		725.268	1	4.21818	2.4396	3	0.777895	1.12597	DENV	Ctrl	100 - 90.7	90729.9	3.88	75712.4	82343.4	82948.4	79146.6	82746.4	86850	103633	86254.4	79837.6	97074.8	81857.3	69758.8	89275.7	79417.4	71666.3	88779.5	134879	82320.2	70941	90118.5	x	x	x	x	CSID139688	Antazoline Phosphate	2M-H	C17H22N3O4P	30.6	0	8.20181	61.9072	http://nonlinear.com/redirect/outbound?p=chemspider&param=139688	0.0491176	2.45769
	2.60_438.1421m/z		438.142	1	2.59867	1.21932	7	0.777895	1.1221	DENV	Ctrl	100 - 98.7	54056.3	6.08	46403.4	50547.8	43702	47115.5	53103.6	52127.1	57013.9	50844.7	52149.7	58146.2	50169.6	42822.5	47035.5	47276.7	45992.8	53285.2	74204.4	48525.6	46338.5	53979.5	x	x	x	x	CSID112457	Lestaurtinib	M-H	C26H21N3O4	32.9	10.8	-8.70061	63.4263	http://nonlinear.com/redirect/outbound?p=chemspider&param=112457	0.0281823	1.95831
	1.95_545.1818m/z		545.182	1	1.94988	1.15507	4	0.777895	1.10847	DENV	Ctrl	100 - 92.2	51762.4	3.1	44880.8	48662.7	46726.7	45833.2	47381.8	49329.1	55875.4	47831.9	50661.2	55114.3	48523.4	41225.6	50291	45990.1	41037.2	50425	72722.5	45650.2	45015.9	51164.9	x	x	x	x	CSID5256697	kanamycin A 3'-phosphate	M-H2O-H	C18H37N4O14P	37.8	36.7	-8.46317	61.4935	http://nonlinear.com/redirect/outbound?p=chemspider&param=5256697	0.0166145	1.86368
	2.10_427.1279m/z		427.128	1	2.0993	0.820083	31	0.777895	1.1071	DENV	Ctrl	100 - 83.5 - 64.3	42502.5	4.31	37527.9	41012.4	36259.6	35874.3	41280.4	41313.4	44532.9	40651.5	41598.2	44416.6	40573.7	34744.5	39025.5	35997	35752.8	42231.3	57960.2	38797.3	36962.8	41233.8	x	x	x	x	HMDB0035007	Lucuminic acid	M-H2O-H	C19H26O12	30.3	9.03	7.38894	50.6759	http://nonlinear.com/redirect/outbound?p=hmdb&param=HMDB0035007	0.0202765	1.67225
	2.46_144.0416m/z		144.042	1	2.45662	0.192917	14	0.777895	1.18063	Ctrl	DENV	100 - 10 - 0.196	14945.2	6.82	17948.2	13718.5	15971.4	14258.6	12829.4	13998	12205.7	12629	11674.1	12786.5	19404.9	11621.9	17189.6	14307.4	11111.5	14309	15885.9	12053	10373.2	11870.2	x	x	x	x	CSID161466	O-ureido-D-serine	M-H2O-H	C4H9N3O4	45.7	34	0.83009	95.3979	http://nonlinear.com/redirect/outbound?p=chemspider&param=161466	0.0422219	1.17329
	6.84_359.1869m/z		359.187	1	6.8432	0.185583	44	0.777895	1.19878	Ctrl	DENV	100 - 22.4 - 7.78	102438	3.49	89001.2	105226	96192.3	106540	115230	82574.4	86662.4	88722.8	87284.5	82013.8	96224.7	89144.2	103530	106904	99800.5	84408.9	112792	84676	77558.1	76136.8	x	x	x	x	HMDB0061033	6-beta-hydrocortisol	M-H2O-H	C21H30O6	44.5	28.6	1.45773	95.9457	http://nonlinear.com/redirect/outbound?p=hmdb&param=HMDB0061033	0.00552091	3.56457
	4.19_187.0938m/z		187.094	1	4.18962	0.149917	54	0.777895	1.22607	Ctrl	DENV	100 - 10 - 0.916	24633.7	9.98	26790.8	20788.9	26444.9	23421.3	25722.4	19099.5	17945.6	23321.4	19870.7	20220.7	28965.2	17611.7	28462.1	23501.4	22278.1	19523.8	23356.4	22257.7	17656.5	18771.7	x	x	x	x	CSID1664	4-Aminopyridine	2M-H	C5H6N2	38.7	22.5	-27.1953	95.8613	http://nonlinear.com/redirect/outbound?p=chemspider&param=1664	0.0134331	1.79292
	7.31_351.1850m/z		351.185	1	7.30672	0.15725	16	0.777895	1.26221	Ctrl	DENV	100 - 18.8	7529.15	9.23	8115.81	7422.01	6942.19	8366.2	6799.53	5883.14	7403.14	4799.79	6211.29	5527.99	8774.5	6287.7	7471.74	8394.83	5889.05	6013.84	9635.29	4580.87	5519.14	5131.87	x	x	x	x	HMDB0014909	Clidinium	M-H	C22H26NO3+	37.8	0	2.7811	92.5266	http://nonlinear.com/redirect/outbound?p=hmdb&param=HMDB0014909	0.0193421	1.03603
	3.37_241.1047m/z		241.105	1	3.36932	0.207	20	0.751757	1.30228	Ctrl	DENV	100 - 15.5	45766.6	8.23	39946.3	46181.7	49398.3	44653.9	48652.7	31346.6	39714.8	35383.8	31886.9	37385.4	43188.4	39123.7	53166.3	44806.7	42137.9	32043	51689.4	33769.9	28333.7	34706.5	x	x	x	x	HMDB0014737	Thiopental	M-H	C11H18N2O2S	41.8	29.3	12.7775	93.1917	http://nonlinear.com/redirect/outbound?p=hmdb&param=HMDB0014737	0.00203708	2.93069
	6.21_302.2059n	302.206	301.199	1	6.20818	0.142983	6	0.777895	1.33467	Ctrl	DENV	100 - 17.9 - 0.832	18179.7	12.37	18974.2	14510.4	18567.9	18219.6	20626.7	12735.7	10517.8	10274.7	19565	15012.6	20514.2	12292.7	19984.2	18281.9	17864.7	13018.6	13689	9806.08	17384.8	13936.8	x	x	x	x	HMDB0037830	xi-7-Hydroxyhexadecanedioic acid	M-H2O-H, M-H	C16H30O5	41.8	23	-11.4289	98.315	http://nonlinear.com/redirect/outbound?p=hmdb&param=HMDB0037830	0.047643	1.65168
	2.21_519.1464m/z		519.146	1	2.21372	0.142967	10	0.777895	1.33959	Ctrl	DENV	100 - 26.6	15401.6	10.15	11906.9	14964	14822.6	17569	17745.3	11253.7	11126.7	11152.2	10448	13505.3	12873.3	12677.1	15953.3	17629.1	15369.1	11503.7	14481.6	10643.5	9283.78	12537.6	x	x	x	x	HMDB0034265	Lippioside I	M-H2O-H	C25H30O13	43.9	35.4	-8.13773	93.4543	http://nonlinear.com/redirect/outbound?p=hmdb&param=HMDB0034265	0.00958552	1.67622
	0.87_202.0253m/z		202.025	1	0.873033	0.121517	2	0.777895	1.34512	Ctrl	DENV	100 - 9.9 - 6.35 - 2.05	87842.8	15.04	87671	105180	70915.6	80260.4	95187.2	69234.3	54305.2	58747.3	80101.2	64136.5	94786.6	89105.2	76325	80535	82441.3	70772.5	70679	56067.7	71175.3	59540.6	x	x	x	x	CSID21954	AMPYZINE SULFATE	M-H2O-H	C6H11N3O4S	35.8	0	-17.6993	97.0184	http://nonlinear.com/redirect/outbound?p=chemspider&param=21954	0.0146294	3.96074
	3.63_120.0541n	120.054	165.052	1	3.62558	0.207417	17	0.777895	1.39879	Ctrl	DENV	100 - 9.9 - 0.601	49136.5	21.32	56835.6	42882.7	59502	52269	34193.1	33931.8	47787.4	26678	30117.1	37124.8	61448.5	36328.9	64040.7	52447.8	29614.5	34685.7	62196	25461.2	26761	34464.5	x	x	x	x	HMDB0062765	Styrene Oxide	M-H, M+FA-H	C8H8O	40.4	28.9	-28.1901	98.9386	http://nonlinear.com/redirect/outbound?p=hmdb&param=HMDB0062765	0.0462093	2.92293
	9.28_752.4015m/z		752.401	1	9.27675	0.08585	2	0.777895	1.43752	Ctrl	DENV	100 - 47.2 - 15.7 - 8.75	7528.12	11	7332.77	7034.88	8634.29	8078.25	6560.39	6563.91	5006.86	6302.38	2691.74	5619.5	7927.91	5959.74	9292.91	8105.89	5681.93	6709.74	6516.5	6014.92	2391.79	5216.82	x	x	x	x	HMDB0014454	Vindesine	M-H	C43H55N5O7	41.4	15.7	-1.86054	93.6658	http://nonlinear.com/redirect/outbound?p=hmdb&param=HMDB0014454	0.0440672	1.25069
	8.28_437.2897m/z		437.29	1	8.28418	0.42855	33	0.777895	1.43795	Ctrl	DENV	100 - 27.7 - 1.81	159056	12.01	186619	94629.6	181409	143325	189297	119679	96565	124800	115575	96447.8	201766	80167.3	195247	143816	163950	122338	125681	119108	102696	89536.5	x	x	x	x	HMDB0002488	7a,12b-dihydroxy-5b-Cholan-24-oic acid	M+FA-H	C24H40O4	51.5	64.2	-3.07088	96.93	http://nonlinear.com/redirect/outbound?p=hmdb&param=HMDB0002488	0.0458186	5.54633
	9.26_434.0535m/z		434.053	1	9.26247	0.08585	4	0.777895	1.50601	Ctrl	DENV	100 - 20.6 - 15.7 - 0.48	4032.63	9.74	3628.16	4620.11	4112.41	4084.27	3718.22	3170.11	2353.35	3405.16	1583.62	2876.2	3922.63	3914.02	4426.1	4098.25	3220.34	3240.54	3062.92	3249.85	1407.15	2670.1	x	x	x	x	HMDB0060858	o-O-sulfate rosiglitazone	M-H2O-H	C18H19N3O7S2	37.8	6.09	10.7616	94.7723	http://nonlinear.com/redirect/outbound?p=hmdb&param=HMDB0060858	0.0155985	1.00987
	7.43_294.1805n	294.18	293.173	1	7.42827	0.135833	8	0.777895	1.5533	Ctrl	DENV	100 - 17.3 - 1.56	10285.1	18.25	9468.4	11244.8	12837.1	10023.6	7851.88	7928.83	4798.56	10591.9	3835.08	5952.99	10236.9	9526.23	13816.3	10057.8	6800.48	8104.98	6245.39	10108.8	3407.72	5526.41	x	x	x	x	HMDB0035722	Tanacetol A	M-H2O-H, M-H	C17H26O4	49.2	58.1	-8.99232	97.7877	http://nonlinear.com/redirect/outbound?p=hmdb&param=HMDB0035722	0.0376868	1.51792
	2.34_519.1443m/z		519.144	1	2.33507	0.164183	4	0.751757	1.57636	Ctrl	DENV	100 - 30.5 - 12.1 - 2.58	52952.1	6.47	41782.2	48661.4	46591.5	60954.3	66771.1	33328.7	30615.5	32613.2	35441.7	35957.9	45173.3	41224.4	50145.5	61162.9	57830.2	34069.1	39846.4	31125.6	31492.4	33381.2	x	x	x	x	CSID8030195	Fluticasone furoate	M-H2O-H	C27H29F3O6S	39.9	4.76	-2.91201	98.0967	http://nonlinear.com/redirect/outbound?p=chemspider&param=8030195	0.0013533	3.88395
	8.68_340.2228n	340.223	321.205	1	8.67657	0.128733	1	0.777895	1.57696	Ctrl	DENV	100 - 21.8 - 3.31 - 0.0174	25525.9	11.26	23306.9	27875	26489.5	28225.2	21732.7	17689	13319	23735	13044.3	13146.6	25198.6	23614.9	28510.1	28321.7	18822.6	18082	17334.9	22652.4	11590.7	12204.5	x	x	x	x	CSID392004	terguride	M-H2O-H, M-H	C20H28N4O	37.4	0	-10.1981	98.1546	http://nonlinear.com/redirect/outbound?p=chemspider&param=392004	0.00580336	2.67085
	10.63_456.3232n	456.323	455.316	1	10.6337	0.213717	1	0.777895	1.58527	Ctrl	DENV	100 - 25.5	39784.9	17.3	22872.1	54120.1	43838.6	45430.1	32663.6	21713	23089.2	21108.1	29665.8	29907.2	24728.5	45848.9	47182.6	45585.6	28289.8	22195.4	30050.9	20145.3	26360	27764.1	x	x	x	x	CSID4581330	callystatin A	M-H, M+FA-H	C29H44O4	38.3	3.05	-1.59056	90.5813	http://nonlinear.com/redirect/outbound?p=chemspider&param=4581330	0.0348524	3.05606
	9.93_350.2441n	350.244	349.236	1	9.9266	0.143267	13	0.777895	1.61078	Ctrl	DENV	100 - 23.2 - 5.51 - 0.286	15252.8	12.39	13351.3	16269.8	14929.4	17955.4	13758.3	9529.55	6985.69	13438.1	10113.2	7279.55	14434.9	13783.3	16068.2	18016.9	11916	9741.26	9091.98	12825.2	8986.28	6757.91	x	x	x	x	HMDB0041997	Pregnanetriolone	M-H2O-H, M-H	C21H34O4	40.7	10.4	-4.57738	98.2729	http://nonlinear.com/redirect/outbound?p=hmdb&param=HMDB0041997	0.00515312	2.12029
	8.52_306.1809n	306.181	305.173	1	8.51975	0.170867	5	0.777895	1.61703	Ctrl	DENV	100 - 18.1 - 6.02	11603	14.19	13393.9	10517.2	13415.1	10359.1	10330	9247.13	6969	7277.86	4790.88	7592.8	14481	8909.81	14438.4	10394.6	8946.76	9452.57	9070.24	6945.91	4257.02	7048.71	x	x	x	x	HMDB0034780	Capsiate	M-H2O-H, M-H	C18H26O4	37.7	0.978	-7.08765	95.7363	http://nonlinear.com/redirect/outbound?p=hmdb&param=HMDB0034780	0.0039891	1.87618
	10.01_310.2121n	310.212	309.204	1	10.0054	0.171117	12	0.751757	1.67666	Ctrl	DENV	100 - 19.2 - 6.64 - 0.129	22925.7	12.33	26520.9	18694.7	23948.1	22693.1	22771.6	16898.6	12237.7	15331.9	9312.49	14586.2	28673.3	15837.6	25774.9	22770.8	19722.4	17274	15927.6	14632.6	8274.77	13541	x	x	x	x	HMDB0038484	Auxin b	M-H2O-H, M-H	C18H30O4	39.3	8.61	-7.41443	96.1685	http://nonlinear.com/redirect/outbound?p=hmdb&param=HMDB0038484	0.00212594	2.77032
	9.27_308.1963n	308.196	307.189	1	9.2696	0.2003	10	0.777895	1.82834	Ctrl	DENV	100 - 20.4 - 0.702	154450	9.71	175611	140378	164657	145453	146150	115462	83050.8	92887.1	40815.3	90161.4	189864	118924	177217	145951	126580	118027	108092	88650.4	36267.1	83700.5	x	x	x	x	HMDB0062357	(6E,8E,10R,12Z)-10-Hydroxy-3-oxooctadecatrienoic acid	M-H2O-H, M-H	C18H28O4	43.3	27.4	-7.83711	97.7521	http://nonlinear.com/redirect/outbound?p=hmdb&param=HMDB0062357	0.00702508	7.61408
	11.43_453.3006m/z		453.301	1	11.4269	0.150417	8	0.777895	1.83006	Ctrl	DENV	100 - 27 - 14.6	21096.6	20.94	9114.08	29870.7	24861.2	21484.3	20152.5	8478.45	12272.9	9798.44	14621.4	12467.6	9853.8	25305.5	26757.6	21557.9	17454	8666.82	15973.4	9351.52	12992.1	11574.2	x	x	x	x	HMDB0039148	Ganodosterone	M+FA-H	C28H40O2	49.9	60.4	-0.994139	90.3716	http://nonlinear.com/redirect/outbound?p=hmdb&param=HMDB0039148	0.0400555	2.49588
	4.18_544.1419m/z		544.142	1	4.17535	0.0785167	2	0.777895	1.86438	Ctrl	DENV	100 - 32.6 - 9.96	11040.2	32.76	12312.5	4602.83	12673.4	12372.9	13239.7	4054.12	4577.26	8382.76	8150.7	4443.49	13311.8	3899.38	13640.1	12415.2	11466.8	4144.19	5957.37	8000.41	7242.45	4125.08	x	x	x	x	CSID134000	Esorubicin Hydrochloride	M-H2O-H	C27H29ClNO10	33.6	0	6.96999	76.0711	http://nonlinear.com/redirect/outbound?p=chemspider&param=134000	0.0456888	1.83636
	9.27_407.1158m/z		407.116	1	9.2696	0.0858667	23	0.777895	1.91129	Ctrl	DENV	100 - 31.3 - 10.6 - 0.616	4208.08	11.9	4685.38	3765.69	4724.31	4216.57	3648.47	3223.49	1964.56	2525.05	924.734	2370.67	5065.66	3190.18	5084.68	4231	3159.92	3295.11	2556.9	2409.88	821.688	2200.79	x	x	x	x	HMDB0128937	2-{9-hydroxy-2-oxo-2H,8H,9H-furo[2,3-h]chromen-8-yl}propan-2-yl (2E)-3-(4-hydroxyphenyl)prop-2-enoate	M-H	C23H20O7	41.4	21.6	5.43993	91.6223	http://nonlinear.com/redirect/outbound?p=hmdb&param=HMDB0128937	0.0111542	1.27316
	9.28_462.0988m/z		462.099	1	9.28407	0.093	8	0.777895	1.96001	Ctrl	DENV	100 - 27.4 - 23.7 - 5.05	3006.53	8.51	3397.21	2855.69	3048.73	2715.35	3015.66	2333.65	1452.95	1504.85	718.092	1660.13	3672.94	2419.25	3281.29	2724.64	2611.85	2385.49	1891.04	1436.21	638.072	1541.17	x	x	x	x	HMDB0134834	3,8-dihydroxy-7-(4-hydroxy-3,5-dimethoxyphenyl)-12-(4-hydroxyphenyl)-6位鈦?11,13-trioxatetracyclo[7.4.1.0鈦?鹿鈦?0鹿鈦?鹿虏]tetradeca-1,3,5(14),6,8-pentaen-6-ylium	M-H	C25H19O9+	35.6	0.0861	6.87803	85.4822	http://nonlinear.com/redirect/outbound?p=hmdb&param=HMDB0134834	0.0055333	1.10941
	9.28_680.3077m/z		680.308	1	9.27675	0.6075	1	0.777895	1.9603	Ctrl	DENV	100 - 65 - 15.7 - 3.28	41682.5	17.6	51047.2	32952.7	47307	38703.5	38402.2	30634.3	25341.4	21522.5	8238.89	20579.8	55190.3	27916.5	50915.6	38836	33260	31314.9	32982.1	20540.9	7320.81	19105	x	x	x	x	HMDB0033242	Glycylserylprolylmethionylphenylalanylvalinamide	M+FA-H	C29H45N7O7S	42.3	31.1	-0.92992	81.4963	http://nonlinear.com/redirect/outbound?p=hmdb&param=HMDB0033242	0.0144327	4.00111
	9.27_245.1885m/z		245.188	1	9.2696	0.107267	13	0.777895	1.99038	Ctrl	DENV	100 - 15.8 - 0.308	5930.7	13.82	7066.59	4985.72	6406.89	5431.19	5763.13	4249.26	3043.58	3222.56	1229.01	3154.01	7640.13	4223.75	6895.6	5449.77	4991.43	4343.66	3961.27	3075.58	1092.06	2928	x	x	x	x	HMDB0040373	Ginsenoyne J	M-H	C17H26O	38.8	9.15	-10.5954	96.2244	http://nonlinear.com/redirect/outbound?p=hmdb&param=HMDB0040373	0.00887406	1.55591
	3.55_493.0791m/z		493.079	1	3.5542	0.0706833	9	0.777895	2.20786	Ctrl	DENV	100 - 23.6 - 13.7	6014.55	31.66	7107.99	2973.2	8282.92	3758.2	7950.43	3502.99	1968.32	2697	3674.01	1778.43	7684.88	2518.81	8914.74	3771.06	6885.83	3580.81	2561.8	2573.99	3264.6	1650.99	x	x	x	x	HMDB0127812	3,4,5-trihydroxy-6-{[3-hydroxy-2-(3-methoxyphenyl)-5-sulfino-3,4-dihydro-2H-1-benzopyran-7-yl]oxy}oxane-2-carboxylate	M-H2O-H	C22H24O12S	38.1	0.332	-3.81478	94.4987	http://nonlinear.com/redirect/outbound?p=hmdb&param=HMDB0127812	0.0191474	1.48482
	2.29_269.1460m/z		269.146	1	2.2851	0.185583	4	0.777895	2.36972	Ctrl	DENV	100 - 16.6	5898.18	97.23	16084.8	3732.49	2201.89	3948.52	3523.25	157.789	464.313	11585.6	136.23	100.989	17390.2	3162.06	2369.85	3962.03	3051.47	161.294	604.31	11057.2	121.049	93.7522	x	x	x	x	CSID38408	Isamoxole	M+FA-H	C12H20N2O2	37.2	9.61	-21.003	96.7066	http://nonlinear.com/redirect/outbound?p=chemspider&param=38408	0.0337727	1.03672
	8.16_863.6088m/z		863.609	1	8.15545	0.0785333	1	0.777895	2.43578	Ctrl	DENV	100 - 57.1 - 19.5 - 1.65	6990.47	44.1	6099.11	2090.51	10498.3	6637.91	9626.46	2376.75	1678.34	5021.33	2578.98	2694.15	6594.13	1771.01	11299.2	6660.62	8337.44	2429.56	2184.39	4792.3	2291.59	2501.09	x	x	x	x	HMDB0006288	All trans decaprenyl diphosphate	M-H	C50H90O7P2	39.2	0	-0.116699	96.0624	http://nonlinear.com/redirect/outbound?p=hmdb&param=HMDB0006288	0.0407987	1.62652
	9.26_704.2821m/z		704.282	1	9.26247	0.0573	6	0.777895	2.59462	Ctrl	DENV	100 - 45.3 - 44.5 - 16.9	2546.4	13.61	2675.33	2643.01	2884.62	2565.63	1963.42	1581.38	871.028	1307.22	73.6993	1073.74	2892.47	2239.07	3104.66	2574.41	1700.51	1616.51	1133.65	1247.6	65.4868	996.802	x	x	x	x	HMDB0060520	Trypanothione	M-H2O-H	C27H49N9O10S2	34.3	3.32	-6.1943	75.2314	http://nonlinear.com/redirect/outbound?p=hmdb&param=HMDB0060520	0.0488763	1.14386
	1.53_633.2678m/z		633.268	1	1.52925	0.0635333	4	0.777895	7.27832	Ctrl	DENV	100 - 23.3	1841.07	75.73	1258.11	4072.52	747.217	820.284	2307.24	104.251	586.201	97.0769	77.7258	399.511	1360.22	3450.11	804.215	823.091	1998.29	106.567	762.948	92.6491	69.0646	370.882	x	x	x	x	HMDB0029084	Tryptophyl-Hydroxyproline	2M-H	C16H19N3O4	39.2	1.6	-0.0572905	94.2666	http://nonlinear.com/redirect/outbound?p=hmdb&param=HMDB0029084	0.0037193	1.00137
	0.95_695.2972m/z		695.297	1	0.95155	0.06425	2	0.777895	10.3726	Ctrl	DENV	100 - 26.9 - 3.65	12829.3	57.43	2576.32	15542.5	2894.71	1310.74	41822	2038.63	1935.14	898.711	434.204	877.524	2785.42	13167.2	3115.51	1315.23	36221.9	2083.92	2518.62	857.72	385.82	814.642	x	x	x	x	CSID390543	alstonine	2M-H	C21H20N2O3	36.5	0.0354	13.8756	97.0833	http://nonlinear.com/redirect/outbound?p=chemspider&param=390543	0.0427377	2.27514
	2.13_221.0089m/z		221.009	1	2.12787	0.128683	7	0.777895	42.6609	Ctrl	DENV	100 - 9.8 - 6.95	5139.33	67.23	869.763	22915.5	562.008	844.277	505.073	106.965	247.313	21.2341	116.301	110.533	940.355	19413.3	604.878	847.166	437.442	109.341	321.881	20.2655	103.342	102.613	x	x	x	x	HMDB0000192	L-Cystine	M-H2O-H	C6H12N2O4S2	36.5	0	12.2475	95.7475	http://nonlinear.com/redirect/outbound?p=hmdb&param=HMDB0000192	0.0112827	1.32994
pos	3.30_614.8153m/z		614.815	1	3.3037	0.257133	1	0.805528	4.70936	DENV	Ctrl	100 - 79.2 - 94.9 - 99.8 - 93.2 - 27.9 - 16.4 - 4.83 - 3.23	4152.67	28.06	804.708	482.385	999.542	1086.34	1035.98	1095.36	2322.73	1339.07	3108.56	12897.6	1202.04	429.274	1012.81	1081.32	991.473	1095.36	3580.78	1211.58	2471.37	13033.8	x	x	x	x	CSID25724	2347	M+H	C12H13I3N2O3	23.7	0	3.29365	22.2561	http://nonlinear.com/redirect/outbound?p=chemspider&param=25724	0.0372341	1.87745
	1.96_498.7682m/z		498.768	1	1.95577	0.156533	1	0.805528	4.28385	DENV	Ctrl	100 - 24.9	2015.89	60.69	878.672	339.416	405.727	123.927	605.156	837.899	1047.61	1178.66	1503.99	5511.29	1312.52	302.045	411.111	123.355	579.156	837.899	1615.03	1066.44	1195.71	5569.49	x	x	x	x	CSID153464	UNII:490D9F069T	M+Na	C3H2La2O10	19.3	0	3.21329	0.0781069	http://nonlinear.com/redirect/outbound?p=chemspider&param=153464	0.0192954	1.373
	2.85_672.8402m/z		672.84	1	2.84718	0.150117	3	0.805528	3.94483	DENV	Ctrl	100 - 26.6 - 12.2	1010.93	57.68	260.619	110.156	228.439	114.388	567.736	752.552	412.522	1824.36	663.302	1401.93	389.302	98.0275	231.471	113.86	543.343	752.552	635.954	1650.66	527.339	1416.74	x	x	x	x	HMDB0004122	Selenocystine	2M+H	C6H12N2O4Se2	17.6	0	11.0076	0.112068	http://nonlinear.com/redirect/outbound?p=hmdb&param=HMDB0004122	0.0077316	1.10806
	2.66_557.7880m/z		557.788	1	2.6616	0.3205	1	0.805528	3.68221	DENV	Ctrl	100 - 95.3 - 21.4	3392.72	31.64	1016.85	452.182	1133.24	1164.75	839.885	1638.24	2459.56	1490.02	2329.85	9045.93	1518.93	402.396	1148.28	1159.37	803.8	1638.24	3791.72	1348.16	1852.28	9141.47	x	x	x	x	CSID6366	Tetrabromobisphenol A	M+NH4	C15H12Br4O2	20.5	0	-5.47564	8.55162	http://nonlinear.com/redirect/outbound?p=chemspider&param=6366	0.0170412	1.7324
	1.32_140.0340m/z		140.034	1	1.32002	0.150133	24	0.805528	2.87142	DENV	Ctrl	100 - 1.69	1310.09	43.09	404.674	1240.34	268.63	232.514	135.095	1709.92	1104.89	1042.43	2053.22	639.959	604.485	1103.77	272.195	231.44	129.29	1709.92	1703.33	943.181	1632.35	646.718	x	x	x	x	HMDB0013188	3-Hydroxypicolinic acid	M+H	C6H5NO3	39.9	7.24	-1.49602	94.2863	http://nonlinear.com/redirect/outbound?p=hmdb&param=HMDB0013188	0.0163666	1.16625
	1.33_260.1960m/z		260.196	1	1.32715	0.128733	9	0.805528	2.43345	DENV	Ctrl	100 - 7.18	2752.85	39.86	1847.49	880.29	948.837	538.669	1440.98	2056.07	2828.62	1352.64	3363.1	4163.8	2759.7	783.369	961.43	536.181	1379.06	2056.07	4360.67	1223.86	2673.73	4207.78	x	x	x	x	HMDB0028912	Isoleucyl-Lysine	M+H	C12H25N3O3	38.6	4.48	-3.1663	92.2359	http://nonlinear.com/redirect/outbound?p=hmdb&param=HMDB0028912	0.0142568	1.65756
	5.59_311.1970m/z		311.197	1	5.58593	0.249133	38	0.805528	2.36231	DENV	Ctrl	100 - 16.2	18984.7	38.01	4598.91	11589.1	5319.48	10365.5	8309.48	19276.1	9910.25	29242.5	25500.8	10993.8	6869.67	10313.1	5390.07	10317.7	7952.46	19276.1	15277.9	26458.3	20273.7	11109.9	x	x	x	x	HMDB0006035	4-Dihydroboldenone	M+Na	C19H28O2	45.4	37.4	-3.95782	93.9862	http://nonlinear.com/redirect/outbound?p=hmdb&param=HMDB0006035	0.0190493	4.19395
	4.40_172.0763n	172.076	345.204	1	4.40235	0.107083	6	0.805528	2.30628	DENV	Ctrl	100 - 11.5	9818.59	19.95	3647.27	4955.22	3269.49	5275.56	4139.1	6659.14	10520.9	8737.71	8301.12	14874.1	5448.14	4409.64	3312.88	5251.2	3961.26	6659.14	16219.3	7905.79	6599.56	15031.1	x	x	x	x	HMDB0032352	3-Isopropenylpentanedioic acid	M+H, 2M+H	C8H12O4	37.1	4.98	15.9896	96.7281	http://nonlinear.com/redirect/outbound?p=hmdb&param=HMDB0032352	0.0010203	3.2279
	2.49_494.7563m/z		494.756	1	2.49098	1.40487	1	0.805528	2.23005	DENV	Ctrl	56.2 - 100 - 76 - 49.9 - 32.7	17534.4	30.56	6660.64	5626.31	10025.9	10861.8	6139.09	9742.92	15890.2	9814.92	12489.6	39734.1	9949.39	5006.84	10159	10811.6	5875.32	9742.92	24496.8	8880.44	9929.5	40153.8	x	x	x	x	HMDB0034898	3,3-Dichloro-4-(dichloromethylene)-2,5-pyrrolidinedione	2M+H	C5HCl4NO2	27.5	0	-6.5845	44.8536	http://nonlinear.com/redirect/outbound?p=hmdb&param=HMDB0034898	0.0482442	3.39181
	4.58_253.1927m/z		253.193	1	4.5801	0.127783	6	0.805528	2.17974	DENV	Ctrl	100 - 40.3 - 6.24	2364.92	25.31	757.765	1377.9	831.289	1266.75	1191.07	1624.81	2221.27	1676.72	1407.39	4894.41	1131.92	1226.19	842.322	1260.9	1139.9	1624.81	3424.37	1517.08	1118.9	4946.1	x	x	x	x	CSID54139	Phenol, 3-(2-(1,1-dimethylethyl)-3-methyl-5-oxazolidinyl)-	M+NH4	C14H21NO2	38	17.9	7.19646	80.0552	http://nonlinear.com/redirect/outbound?p=chemspider&param=54139	0.0256808	1.30035
	1.95_925.3585m/z		925.359	1	1.94863	0.107067	3	0.805528	2.17837	DENV	Ctrl	100 - 28.2	2044.93	40.05	887.789	898.929	752.867	582.837	1571.29	3694.58	1984.66	816.008	2166.57	1562.81	1326.14	799.956	762.858	580.145	1503.78	3694.58	3059.6	738.315	1722.47	1579.31	x	x	x	x	CSID391848	plicamine	2M+H	C26H26N2O6	43.3	30.2	-7.49554	94.5768	http://nonlinear.com/redirect/outbound?p=chemspider&param=391848	0.0400761	1.2586
	7.67_281.2465m/z		281.247	1	7.6687	0.107067	40	0.805528	2.10782	DENV	Ctrl	100 - 16.3 - 0.507	2633.56	39.59	1467.52	1197.71	468.374	1236.63	1876.88	3641.41	1583.29	1736.14	3804.31	2402.65	2192.13	1065.84	474.591	1230.92	1796.24	3641.41	2440.84	1570.84	3024.5	2428.03	x	x	x	x	HMDB0037001	Santene hydrate	2M+H	C9H16O	38.5	2.38	-3.49111	94.4544	http://nonlinear.com/redirect/outbound?p=hmdb&param=HMDB0037001	0.031669	1.48728
	1.32_240.0875m/z		240.087	1	1.32002	0.157383	24	0.805528	2.00599	DENV	Ctrl	100 - 14.4	7637	33.56	3006.21	8035.66	2912.14	2613.09	2468.33	9118.98	6433.19	6902.24	11181.2	4549.34	4490.55	7150.92	2950.79	2601.02	2362.28	9118.98	9917.57	6245.08	8889.31	4597.38	x	x	x	x	CSID571143	2-Hydroxy-7-hydroxymethyl-2H-chromene-2-carboxylic acid	M+NH4	C11H10O5	40.9	12.3	3.76891	96.4934	http://nonlinear.com/redirect/outbound?p=chemspider&param=571143	0.0211864	2.41816
	3.80_689.2894m/z		689.289	1	3.80288	0.200433	1	0.805528	1.95418	DENV	Ctrl	100 - 38.8 - 20.1	37878.7	31.01	40880.9	13962.9	11477.6	11137.1	19458.4	36072.4	35676.6	37516.8	23722.3	56405.3	61066.2	12425.6	11630	11085.7	18622.4	36072.4	54999.9	33944.8	18859.7	57001	x	x	x	x	HMDB0029117	Tyrosyl-Tyrosine	2M+H	C18H20N2O5	33.9	3.72	11.1194	77.6669	http://nonlinear.com/redirect/outbound?p=hmdb&param=HMDB0029117	0.0248777	5.2907
	7.67_299.2487m/z		299.249	1	7.6687	0.107067	13	0.805528	1.92476	DENV	Ctrl	100 - 6.48	1108.86	8.11	597.662	613.591	403.777	710.56	554.939	1210.1	1063.47	978.516	1133.62	1158.62	892.763	546.034	409.136	707.278	531.097	1210.1	1639.47	885.351	901.25	1170.86	x	x	x	x	HMDB0015517	Methamphetamine	2M+H	C10H15N	38.6	0	1.66199	95.1233	http://nonlinear.com/redirect/outbound?p=hmdb&param=HMDB0015517	0.000162986	1.08422
	2.25_231.1691m/z		231.169	1	2.24813	0.128483	15	0.805528	1.89734	DENV	Ctrl	100 - 13.1	15656.8	19.47	10260.7	6017.53	9022.61	7454.43	8504.49	14757.4	10590.1	17795.8	11824.2	23316.4	15327.1	5354.99	9142.35	7420	8139.1	14757.4	16326	16101.5	9400.5	23562.6	x	x	x	x	HMDB0029130	Valyl-Isoleucine	M+H	C11H22N2O3	41.2	13.5	-5.47732	98.6015	http://nonlinear.com/redirect/outbound?p=hmdb&param=HMDB0029130	0.00643734	3.56881
	6.21_347.2198m/z		347.22	1	6.2138	0.1715	42	0.805528	1.79114	DENV	Ctrl	100 - 50.5	7467.88	15.4	4152.05	4822.88	3392.4	4790.78	3688.57	6244.61	8852.82	7868.39	4708.88	9664.69	6202.16	4291.87	3437.42	4768.66	3530.09	6244.61	13647.7	7119.24	3743.66	9766.76	x	x	x	x	HMDB0031007	1-Acetoxy-2-hydroxy-16-heptadecyn-4-one	M+Na	C19H32O4	37.1	8.8	1.72114	78.7566	http://nonlinear.com/redirect/outbound?p=hmdb&param=HMDB0031007	0.00524022	2.44698
	4.58_329.2081m/z		329.208	1	4.5801	0.291967	29	0.805528	1.78012	DENV	Ctrl	100 - 34	19530.9	15.19	8930.74	12869.7	9642.8	11213.4	12201.6	15183.3	19732.7	16467.9	12303.5	33967.1	13340.4	11452.8	9770.77	11161.6	11677.3	15183.3	30420.5	14900	9781.58	34325.8	x	x	x	x	CSID10128496	dihydromonacolin L	M+Na	C19H30O3	45.8	43	-2.06014	88.3686	http://nonlinear.com/redirect/outbound?p=chemspider&param=10128496	0.022664	3.50492
	2.87_245.1853m/z		245.185	1	2.8686	0.157267	94	0.805528	1.75794	DENV	Ctrl	100 - 13.2	9262.93	27.74	7796.6	4154.66	4724.26	4484.92	5185.51	6703.57	9003.63	8577.58	7023.34	15006.5	11646.2	3697.22	4786.96	4464.2	4962.72	6703.57	13880.2	7760.91	5583.7	15165	x	x	x	x	HMDB0028910	Isoleucyl-Isoleucine	M+H	C12H24N2O3	39.6	3.59	-2.74621	97.813	http://nonlinear.com/redirect/outbound?p=hmdb&param=HMDB0028910	0.016657	2.46568
	0.78_180.0549n	180.055	203.052	1	0.777883	0.135633	10	0.805528	1.74172	DENV	Ctrl	100 - 1.43	6088.1	22.01	2602.12	2668.52	5537.06	3059.75	3609.81	5401.35	7583.81	6161.5	4218.75	7075.07	3886.94	2374.71	5610.55	3045.61	3454.72	5401.35	11691.4	5574.86	3353.99	7149.79	x	x	x	x	HMDB0003269	Nicotinuric acid	M+H, M+Na	C8H8N2O3	39	12.3	7.92795	91.6909	http://nonlinear.com/redirect/outbound?p=hmdb&param=HMDB0003269	0.0105076	2.12971
	2.57_245.1850m/z		245.185	1	2.5688	0.0920833	94	0.805528	1.71358	DENV	Ctrl	100 - 26.7 - 0.721	11715.2	18.32	9801.62	5410.86	6333.67	5253.95	7383.39	11489.9	10704.9	13770.9	8775.47	13834.9	14641.3	4815.11	6417.73	5229.69	7066.16	11489.9	16502.9	12459.8	6976.68	13981	x	x	x	x	CSID871	6-[(6-Aminohexanoyl)amino]hexanoic acid	M+H	C12H24N2O3	38.6	8.03	-3.86927	89.4245	http://nonlinear.com/redirect/outbound?p=chemspider&param=871	0.00474422	3.0258
	5.95_382.1551m/z		382.155	1	5.9502	0.08565	12	0.805528	1.67804	DENV	Ctrl	100 - 22 - 1.17	3749.61	18.66	2165.45	1838.1	1657.05	2326.58	3185.42	3860.18	3021.16	3040.93	4285.02	4540.76	3234.65	1635.72	1679.04	2315.84	3048.56	3860.18	4657.49	2751.41	3406.68	4588.71	x	x	x	x	HMDB0029861	Enrofloxacin	M+Na	C19H22FN3O3	41.3	12.7	3.78267	98.323	http://nonlinear.com/redirect/outbound?p=hmdb&param=HMDB0029861	0.00557022	1.67457
	2.40_231.1698m/z		231.17	1	2.39803	0.1001	16	0.805528	1.65391	DENV	Ctrl	100 - 15.3	14260.5	12.86	9476.34	7859.09	7556.64	8110.21	10109.1	13235.5	11841.3	14888	13177.5	18160	14155.4	6993.79	7656.92	8072.75	9674.8	13235.5	18254.8	13470.5	10476.4	18351.8	x	x	x	x	HMDB0094807	2-nonenoylglycine	M+NH4	C11H19NO3	42	16.7	-2.52989	96.4617	http://nonlinear.com/redirect/outbound?p=hmdb&param=HMDB0094807	0.000637043	3.35731
	1.77_217.1536m/z		217.154	1	1.77018	0.114217	33	0.805528	1.63756	DENV	Ctrl	100 - 23.4	11811.3	13.14	6213.02	6180.97	8193.23	7654.82	7821.61	12031.6	6429.37	15011	10576.9	15007.6	9280.75	5500.44	8301.97	7619.46	7485.55	12031.6	9911.69	13581.8	8408.86	15166.1	x	x	x	x	HMDB0031820	Neotussilagine	M+NH4	C10H17NO3	39.3	12.8	-5.23479	89.4976	http://nonlinear.com/redirect/outbound?p=hmdb&param=HMDB0031820	0.0259726	2.7422
	2.74_245.1852m/z		245.185	1	2.74012	0.1856	94	0.805528	1.62446	DENV	Ctrl	100 - 14.3	15965.6	28.77	14795.9	7379.28	8505	7884.34	10576.8	14212.8	11446.7	17761.1	13320.8	23086.6	22101.6	6566.81	8617.88	7847.92	10122.4	14212.8	17646.6	16070	10590.3	23330.4	x	x	x	x	HMDB0028933	Leucyl-Leucine	M+H	C12H24N2O3	40.1	6.03	-3.2998	98.4041	http://nonlinear.com/redirect/outbound?p=hmdb&param=HMDB0028933	0.0240807	3.07589
	1.50_288.1992m/z		288.199	1	1.4995	0.15725	18	0.805528	1.56416	DENV	Ctrl	100 - 8.92	4753.18	21.6	3887.34	2953.14	3017.98	2029.07	3306.52	3819.45	5169.22	3532.98	5327.36	5916.89	5806.75	2628	3058.03	2019.7	3164.46	3819.45	7969.01	3196.61	4235.37	5979.37	x	x	x	x	HMDB0028923	Leucyl-Arginine	M+H	C12H25N5O3	35.8	0	-13.116	93.0582	http://nonlinear.com/redirect/outbound?p=hmdb&param=HMDB0028923	0.0155784	1.72081
	2.11_231.1691m/z		231.169	1	2.10517	0.156533	15	0.805528	1.55927	DENV	Ctrl	100 - 19.5	15364.3	11.51	11715.5	8894.75	9786.15	8985.69	9885.43	14773	10759.8	17553.6	14664.4	19070.7	17500.1	7915.42	9916.03	8944.19	9460.71	14773	16587.6	15882.3	11658.5	19272.1	x	x	x	x	HMDB0094807	2-nonenoylglycine	M+NH4	C11H19NO3	40.4	15.7	-5.8162	93.0979	http://nonlinear.com/redirect/outbound?p=hmdb&param=HMDB0094807	0.00445824	3.18585
	8.08_368.1647m/z		368.165	1	8.08222	0.113517	9	0.805528	1.49735	DENV	Ctrl	79.2 - 100 - 21.2	5521.92	15.7	4228.79	3176.4	4371.16	3512.9	3149.75	4610.46	4293.6	5648.3	8622.28	4434.97	6316.8	2826.68	4429.17	3496.67	3014.43	4610.46	6619.12	5110.52	6854.9	4481.81	x	x	x	x	HMDB0041414	Chloromarmin	M+NH4	C19H23ClO4	31	12.6	6.7303	49.9613	http://nonlinear.com/redirect/outbound?p=hmdb&param=HMDB0041414	0.0335842	1.6097
	3.83_311.0914m/z		311.091	1	3.8316	0.100283	53	0.805528	1.46768	DENV	Ctrl	100 - 18.4	5636.33	13.66	3786.63	3869.05	3770.3	3150.21	4625.24	5071.29	4507.17	6103.43	8288.04	4211.72	5656.32	3443.06	3820.34	3135.66	4426.52	5071.29	6948.37	5522.32	6589.17	4256.2	x	x	x	x	CSID391929	5-Deoxodihydrokalafungin	M+Na	C16H16O5	38.6	4.92	8.23085	97.1428	http://nonlinear.com/redirect/outbound?p=chemspider&param=391929	0.0294502	1.62977
	2.08_132.1016m/z		132.102	1	2.07662	0.0849667	47	0.805528	1.46494	DENV	Ctrl	100 - 1.9	2544.3	14.61	1801.09	1491.45	2071.35	1846.32	1473.76	2380.78	1902.4	2665.53	2573.84	3198.94	2690.39	1327.24	2098.84	1837.79	1410.44	2380.78	2932.78	2411.74	2046.26	3232.73	x	x	x	x	HMDB0000557	L-Alloisoleucine	M+H	C6H13NO2	41.2	14.3	-2.60566	94.6054	http://nonlinear.com/redirect/outbound?p=hmdb&param=HMDB0000557	0.0078398	1.20167
	2.07_233.1480m/z		233.148	1	2.06948	0.170817	73	0.805528	1.38064	DENV	Ctrl	100 - 9.77	11112.2	17.66	10497.4	7092.83	7345.33	7225.42	8081.85	8404.23	11126.7	11422.9	9570.06	15037.2	15680.6	6311.9	7442.81	7192.04	7734.61	8404.23	17153.2	10335.3	7608.4	15196	x	x	x	x	HMDB0029064	Threoninyl-Isoleucine	M+H	C10H20N2O4	39.5	8.78	-6.91076	96.696	http://nonlinear.com/redirect/outbound?p=hmdb&param=HMDB0029064	0.0325881	2.1429
	4.41_269.1834m/z		269.183	1	4.40948	0.206317	17	0.805528	1.36988	DENV	Ctrl	100 - 49.9	3076.03	11.87	2157.53	2594.72	1872.41	2368.24	2234.42	2659.65	3177.38	3175.12	2490.29	3877.69	3222.82	2309.04	1897.26	2357.3	2138.42	2659.65	4898.33	2872.81	1979.83	3918.64	x	x	x	x	HMDB0030926	Avocadienofuran	M+Na	C17H26O	33.5	6.56	-17.0221	78.1741	http://nonlinear.com/redirect/outbound?p=hmdb&param=HMDB0030926	0.0115383	1.19337
	0.76_527.1565m/z		527.157	1	0.7636	0.228417	116	0.805528	1.36781	DENV	Ctrl	100 - 19	25370.1	8.64	11503.3	17499.2	27250	19345.5	17141.6	23725.1	25840.9	25529.1	23073	28682.4	17183.2	15572.5	27611.6	19256.2	16405.1	23725.1	39836.9	23098.5	18343.5	28985.3	x	x	x	x	HMDB0041948	Nephritogenoside	M+Na	C18H32O16	48.3	51.7	-3.46618	94.0114	http://nonlinear.com/redirect/outbound?p=hmdb&param=HMDB0041948	0.0411061	3.24746
	6.69_317.2189m/z		317.219	1	6.69175	0.2572	3	0.805528	1.36153	DENV	Ctrl	100 - 19.9	11931.7	18.99	9053.48	9650.99	5953.25	10549	8610.3	11786.7	15644.2	9453.54	11330.1	11443.8	13523.7	8588.4	6032.26	10500.3	8240.36	11786.7	24117.5	8553.46	9007.65	11564.6	x	x	x	x	HMDB0144301	1-(dimethylamino)-2-methyl-3,4-diphenylbutane-1,3-diol	M+NH4	C19H25NO2	37.9	4.91	-11.484	96.6737	http://nonlinear.com/redirect/outbound?p=hmdb&param=HMDB0144301	0.0393938	2.20777
	8.54_426.2613m/z		426.261	1	8.53952	0.12085	10	0.805528	1.26904	DENV	Ctrl	100 - 28.6 - 10.1	10630.8	12.53	7609.19	9202.46	6459.4	8804.06	9810.19	9303.14	11902.5	10100.6	9646.23	12201.6	11366.3	8189.25	6545.13	8763.4	9388.7	9303.14	18349.3	9138.96	7668.96	12330.5	x	x	x	x	HMDB0011470	LysoPE(0:0/14:0)	M+H	C19H40NO7P	42.3	21.9	-0.486711	90.075	http://nonlinear.com/redirect/outbound?p=hmdb&param=HMDB0011470	0.0313418	1.89856
	3.03_555.2621m/z		555.262	1	3.02585	0.199167	2	0.805528	1.25169	DENV	Ctrl	100 - 87 - 58.3	26029.3	10.32	19243.2	23350.9	18459.8	20205.8	22717.2	22879.7	25235.5	22916.7	26602.5	32512.2	28744.7	20779.9	18704.7	20112.5	21741.2	22879.7	38903.7	20734.8	21149.6	32855.6	x	x	x	x	HMDB0041328	3'-Deaminofusarochromanone	2M+H	C15H19NO4	27.7	4.91	-14.3829	48.5272	http://nonlinear.com/redirect/outbound?p=hmdb&param=HMDB0041328	0.024007	2.87367
	0.99_204.1287m/z		204.129	1	0.992017	0.170833	2	0.805528	1.24318	DENV	Ctrl	100 - 31.5	7748.38	13.59	5242.14	7286.95	5876.62	6930.8	5827.13	7937.93	6446.99	9369.17	7082.05	7905.78	7830.5	6484.64	5954.61	6898.79	5576.77	7937.93	9938.85	8477.13	5630.38	7989.28	x	x	x	x	CSID83222	ENADENINE	M+H	C10H13N5	33.9	5.01	21.2949	85.2599	http://nonlinear.com/redirect/outbound?p=chemspider&param=83222	0.0375042	1.51979
	0.87_217.1261m/z		217.126	1	0.870683	0.0999333	16	0.805528	1.16604	DENV	Ctrl	100 - 97.3 - 48.6	16352.1	7.14	12901.8	15546.7	13555.4	13736	14377.7	16505.3	18032.9	15775.2	17572.2	13874.6	19272.2	13835	13735.3	13672.6	13760	16505.3	27800	14273.2	13970.3	14021.2	x	x	x	x	HMDB0060477	gamma-Glutamyl-beta-aminopropiononitrile	M+NH4	C8H13N3O3	27.5	10.1	-17.4111	45.1749	http://nonlinear.com/redirect/outbound?p=hmdb&param=HMDB0060477	0.0269962	1.93709
	2.33_264.1536m/z		264.154	1	2.33378	0.135783	15	0.805528	1.13513	Ctrl	DENV	100 - 71.7	8547.76	5.08	8765.47	8709.72	8576.86	7797.63	8889.11	7282.08	7135.04	8507.81	7402.31	7323.73	13093.5	7750.76	8690.69	7761.62	8507.2	7282.08	10999.6	7697.78	5884.99	7401.08	x	x	x	x	HMDB0038588	Dioscoretine	M+Na	C13H23NO3	35.2	24.6	-14.1561	66.1915	http://nonlinear.com/redirect/outbound?p=hmdb&param=HMDB0038588	0.0117391	1.33583
	2.57_279.1439m/z		279.144	1	2.5688	0.256267	12	0.805528	1.16721	Ctrl	DENV	100 - 34.4 - 33.5	41540.1	8.56	42167.7	46241.7	37564	38480.6	43246.4	37687.7	32157.5	38691.1	31133.3	38276.5	62988.4	41150.4	38062.5	38302.9	41388.3	37687.7	49574.8	35007.3	24751.6	38680.8	x	x	x	x	HMDB0029083	Tryptophyl-Glycine	M+NH4	C13H15N3O3	38.5	28.4	-4.70162	69.7238	http://nonlinear.com/redirect/outbound?p=hmdb&param=HMDB0029083	0.0324469	3.0693
	3.77_336.2629m/z		336.263	1	3.77433	0.0786833	2	0.805528	1.18085	Ctrl	DENV	100 - 21.8	6023.07	7.65	6662.73	6293.48	5492.23	5912.76	5754.14	5125.06	6201.82	5038.31	4925.5	4212.39	9952.51	5600.56	5565.12	5885.45	5506.91	5125.06	9560.89	4558.61	3915.88	4256.88	x	x	x	x	CSID30791530	Istamycin X0	M+NH4	C14H30N4O4	40.1	14.7	7.48735	94.2979	http://nonlinear.com/redirect/outbound?p=chemspider&param=30791530	0.0406075	1.1836
	2.46_190.0499m/z		190.05	1	2.46243	0.213583	31	0.805528	1.18289	Ctrl	DENV	100 - 12 - 1.14	64073	7.87	71109.4	64202.1	67929.2	59352.7	57771.6	58943.9	50121.7	58637.1	51612	51516.6	106220	57133.3	68830.7	59078.6	55289.5	58943.9	77269	53054.3	41032.6	52060.7	x	x	x	x	CSID76740	2-Hydroxycinchoninic acid	M+H	C10H7NO3	46.1	31.2	0.244962	99.405	http://nonlinear.com/redirect/outbound?p=chemspider&param=76740	0.0128309	4.14239
	5.60_359.2562m/z		359.256	1	5.60022	0.08495	17	0.805528	1.19321	Ctrl	DENV	100 - 9.48	8465.23	10.76	8982.16	8869.52	6742.31	8956.19	8775.98	7952.81	6196.24	7812.94	6900.86	6609.66	13417.2	7892.97	6831.79	8914.82	8398.93	7952.81	9552.28	7069.07	5486.33	6679.46	x	x	x	x	CSID212753	2alpha-(Hydroxymethyl)-17-methyl-5alpha-androstane-3beta,17beta-diol	M+Na	C21H36O3	43	30.9	1.71819	86.3667	http://nonlinear.com/redirect/outbound?p=chemspider&param=212753	0.0441279	1.45283
	3.00_316.1220m/z		316.122	1	3.00443	0.0778167	38	0.805528	1.19601	Ctrl	DENV	100 - 41.7	8765.81	10.33	10060.1	9302.32	8321.66	7690.78	8454.18	7359.12	6889.36	7445.97	8486.02	6465.46	15027.4	8278.12	8432.1	7655.26	8090.95	7359.12	10620.8	6737.04	6746.56	6533.74	x	x	x	x	CSID8261320	simeconazole	M+Na	C14H20FN3OSi	37	14.9	-10.9635	82.1171	http://nonlinear.com/redirect/outbound?p=chemspider&param=8261320	0.0251936	1.51919
	2.80_196.0855n	196.086	214.089	1	2.80435	0.10015	5	0.805528	1.20325	Ctrl	DENV	100 - 0.457	3681.1	6.82	3909.83	3833.08	3661.44	3264.57	3736.59	3086.97	3205.68	3233.33	3072.5	2698.01	5840.35	3411.05	3710.04	3249.5	3576.05	3086.97	4941.96	2925.49	2442.7	2726.5	x	x	x	x	HMDB0032852	2-(Ethylamino)-4,5-dihydroxybenzamide	M+H, M+NH4	C9H12N2O3	40.8	18.4	3.68324	89.8109	http://nonlinear.com/redirect/outbound?p=hmdb&param=HMDB0032852	0.00350034	1.09707
	2.11_264.1029m/z		264.103	1	2.10517	0.093	28	0.805528	1.2052	Ctrl	DENV	100 - 32.5	10378.8	11.05	12104.1	10565.5	9210.41	9454.48	10559.2	9011.88	8198.68	10121.8	7504.44	8221.42	18080.6	9402.26	9332.65	9410.82	10105.5	9011.88	12639.3	9158.06	5966.19	8308.25	x	x	x	x	CSID207502	6-(1,2,3,4-Tetrahydro-6-hydroxy-2-naphthyl)-2(1H)-pyridone	M+Na	C15H15NO2	39.1	23.1	14.0909	86.9728	http://nonlinear.com/redirect/outbound?p=chemspider&param=207502	0.0286234	1.66936
	8.58_295.2252m/z		295.225	1	8.57542	0.142267	56	0.805528	1.21447	Ctrl	DENV	100 - 13.2	4463.11	12.49	5319.12	3764.75	4256.27	4837.17	4138.24	3717.97	3626.12	4401.99	3155.43	3473.29	7945.48	3350.24	4312.75	4814.83	3960.45	3717.97	5590.12	3982.88	2508.63	3509.97	x	x	x	x	HMDB0006294	16-Hydroxy hexadecanoic acid	M+Na	C16H32O3	41.3	15.8	2.93626	94.2415	http://nonlinear.com/redirect/outbound?p=hmdb&param=HMDB0006294	0.0456171	1.07642
	11.37_427.3565m/z		427.357	1	11.3731	0.186	14	0.805528	1.22436	Ctrl	DENV	100 - 28.3 - 38	27493.5	8.34	28385.1	28496.9	24311.4	30168.1	26106	23569.2	18549.1	24894.1	19795.8	25468.9	42400.4	25359.3	24634.1	30028.7	24984.3	23569.2	28595.8	22523.9	15738.1	25737.9	x	x	x	x	HMDB0031080	Momordenol	M+H	C29H46O2	44.7	46.5	-1.24017	78.3595	http://nonlinear.com/redirect/outbound?p=hmdb&param=HMDB0031080	0.0230873	2.90409
	3.00_234.1481m/z		234.148	1	3.00443	0.12065	18	0.805528	1.22507	Ctrl	DENV	100 - 22.5 - 7.48 - 4.32 - 1.77 - 0.348	11388	6.07	14342.8	11646.2	11070.7	8998.07	10882.3	9511.41	9287.36	9481.79	9845.21	8353.11	21424.7	10363.9	11217.7	8956.51	10414.8	9511.41	14317.6	8579.03	7827.15	8441.32	x	x	x	x	HMDB0040833	3-[4-Hydroxy-3-(3-methyl-2-butenyl)phenyl]-2-propenal	M+NH4	C14H16O2	40.4	20	-3.2714	85.7787	http://nonlinear.com/redirect/outbound?p=hmdb&param=HMDB0040833	0.0415151	1.76086
	6.34_408.2924n	408.292	817.582	1	6.34228	1.2771	37	0.805528	1.23137	Ctrl	DENV	100 - 57.5 - 11.9 - 2.36 - 0.423 - 0.0347	527608	5.35	590290	425351	464932	493994	663472	447056	421298	420884	397921	455207	881751	378519	471102	491713	634967	447056	649485	380812	316355	460015	x	x	x	x	CSID4446980	Bitocholate	M+Na, 2M+H	C24H40O5	41.7	44.5	11.7513	76.4227	http://nonlinear.com/redirect/outbound?p=chemspider&param=4446980	0.0487589	11.9396
	2.71_286.1473m/z		286.147	1	2.71157	0.0927833	31	0.805528	1.26027	Ctrl	DENV	100 - 38.2	11527.7	12.42	13993.3	11166	10401	10688	11390.1	8857.81	6577.35	11263.5	9676.7	9359.81	20902.7	9936.64	10539	10638.6	10900.7	8857.81	10139.8	10191.1	7693.18	9458.66	x	x	x	x	HMDB0014692	Pentostatin	M+NH4	C11H16N4O4	39.2	29	-13.6894	81.1998	http://nonlinear.com/redirect/outbound?p=hmdb&param=HMDB0014692	0.0471202	1.8947
	2.60_285.1473m/z		285.147	1	2.59735	0.0713833	19	0.805528	1.26744	Ctrl	DENV	77.7 - 100	5466.99	9.93	6363.49	5214.12	5150.87	5021.99	5584.49	4019.27	4092.48	5917.62	3940.48	3597.12	9505.52	4640.04	5219.23	4998.79	5344.55	4019.27	6309.08	5354.2	3132.77	3635.11	x	x	x	x	HMDB0038995	(S)-17-Hydroxy-9,11,13,15-octadecatetraynoic acid	M+H	C18H20O3	32	17	-4.40428	48.1094	http://nonlinear.com/redirect/outbound?p=hmdb&param=HMDB0038995	0.0318118	1.32244
	4.73_773.5122m/z		773.512	1	4.73	0.128667	52	0.805528	1.27327	Ctrl	DENV	100 - 46 - 12.3 - 0.245	19984.9	10.47	16403	19840.9	17255.8	24057.3	22367.4	17069.4	17629.5	13648.6	15368.6	14762.6	24502.2	17656.4	17484.8	23946.1	21406.4	17069.4	27178	12349.1	12218.4	14918.6	x	x	x	x	HMDB0115502	PA(22:6(4Z,7Z,10Z,13Z,16Z,19Z)/20:2(11Z,14Z))	M+H	C45H73O8P	46.9	40.5	0.863336	95.0657	http://nonlinear.com/redirect/outbound?p=hmdb&param=HMDB0115502	0.0268538	2.60834
	12.55_326.3052m/z		326.305	1	12.5508	0.17795	7	0.805528	1.27502	Ctrl	DENV	100 - 23.6 - 2.25	5531.14	11.68	6664.86	5180.82	5180.73	5465.12	5164.17	4158.25	4001.51	3799.06	5834.54	3897.01	9955.69	4610.41	5249.49	5439.88	4942.29	4158.25	6168.83	3437.35	4638.58	3938.17	x	x	x	x	HMDB0062432	8Z,11Z-eicosadienoic acid	M+NH4	C20H36O2	39.6	0.419	-0.480975	98.283	http://nonlinear.com/redirect/outbound?p=hmdb&param=HMDB0062432	0.0268134	1.35782
	5.14_272.1641m/z		272.164	1	5.13635	0.12155	23	0.805528	1.28549	Ctrl	DENV	100	3138.14	9.48	3729.83	3453.35	2884.63	2547.25	3075.65	2637.51	2717.36	2309.47	2161.2	2380.47	5571.46	3073.13	2922.91	2535.48	2943.5	2637.51	4189.15	2089.59	1718.2	2405.61	x	x	x	x	CSID390772	Lophocerine	M+Na	C15H23NO2	39.2	20.7	7.82738	84.16	http://nonlinear.com/redirect/outbound?p=chemspider&param=390772	0.0146133	1.08708
	6.80_275.1999m/z		275.2	1	6.79882	0.128483	24	0.805528	1.2938	Ctrl	DENV	100 - 14.4	3679.54	16.57	4686.47	3178.54	3272.84	3470.18	3789.66	2561.91	2813.41	2670.97	3663.89	2509.73	7000.46	2828.57	3316.27	3454.16	3626.83	2561.91	4337.23	2416.67	2912.87	2536.24	x	x	x	x	HMDB0000477	7Z,10Z-Hexadecadienoic acid	M+Na	C16H28O2	43.4	29.5	6.93635	95.5329	http://nonlinear.com/redirect/outbound?p=hmdb&param=HMDB0000477	0.0302293	1.12556
	4.83_327.2134m/z		327.213	1	4.83012	0.114217	15	0.805528	1.30164	Ctrl	DENV	100 - 20	3973.73	9.18	4523.06	3817.2	3533.19	3922.58	4072.61	3441.38	2296.56	3986.33	2729.94	2810.13	6756.36	3396.92	3580.08	3904.47	3897.64	3441.38	3540.44	3606.79	2170.36	2839.81	x	x	x	x	CSID7827804	MFCD03411993	M+H	C18H30O5	38.7	6.91	-9.84927	97.357	http://nonlinear.com/redirect/outbound?p=chemspider&param=7827804	0.0280826	1.21999
	10.11_364.2815m/z		364.281	1	10.1091	0.2422	15	0.805528	1.31291	Ctrl	DENV	100 - 77 - 57.1 - 54.4	3453.9	14.44	4218.29	3656.16	3274.75	3176.2	2944.1	3019.15	2729.74	2822.13	1792.65	2789.98	6301.11	3253.61	3318.21	3161.53	2817.61	3019.15	4208.24	2553.43	1425.2	2819.44	x	x	x	x	CSID10128389	3alpha,21-Dihydroxy-D-homo-5beta-pregn-17a(20)-en-11-one	M+NH4	C22H34O3	30.7	18.9	-9.01803	44.4023	http://nonlinear.com/redirect/outbound?p=chemspider&param=10128389	0.0373778	1.14628
	10.62_439.3211m/z		439.321	1	10.6232	0.213633	41	0.805528	1.339	Ctrl	DENV	100 - 8.56	6399.13	10.54	5108.29	8126.13	6411.85	6429.11	5920.29	4010.11	5018.4	4930.94	4599.45	5336.33	7630.56	7231.43	6496.95	6399.42	5665.93	4010.11	7736.5	4461.47	3656.66	5392.69	x	x	x	x	CSID13085538	2,22,25-trideoxyecdysone	M+Na	C27H44O3	40.8	31.7	6.92273	80.2301	http://nonlinear.com/redirect/outbound?p=chemspider&param=13085538	0.0130344	1.65569
	7.85_419.2419m/z		419.242	1	7.8545	0.0856667	7	0.805528	1.35061	Ctrl	DENV	100 - 35.2 - 1.17	3876.97	12.17	4447.14	3788.84	4232.85	3258.05	3657.98	3197.13	3775.36	2381.88	2488.53	2509.8	6642.95	3371.68	4289.03	3243	3500.82	3197.13	5820.2	2155.1	1978.43	2536.3	x	x	x	x	CSID391758	Naphthyl dipeptide	M+H	C25H30N4O2	41	18.5	-5.38181	92.8556	http://nonlinear.com/redirect/outbound?p=chemspider&param=391758	0.0178521	1.30118
	0.88_168.1114m/z		168.111	1	0.877817	0.0785167	9	0.805528	1.35283	Ctrl	DENV	100 - 20.4	4587.26	10.95	3989.32	4506.31	4592.1	5381.45	4467.12	3747.53	2903.12	3295.21	4030.61	2977.82	5959.08	4010.16	4653.05	5356.6	4275.2	3747.53	4475.52	2981.47	3204.42	3009.27	x	x	x	x	CSID84165	2-Dimethylamino-5,6-dimethyl-4-hydroxypyrimidine	M+H	C8H13N3O	39.7	18.9	-10.1319	90.8125	http://nonlinear.com/redirect/outbound?p=chemspider&param=84165	0.00499834	1.49707
	6.20_249.1843m/z		249.184	1	6.19933	0.1144	42	0.805528	1.3557	Ctrl	DENV	100 - 17.6 - 4.78	5931.2	14.86	6476.48	4974.85	5612.67	5421.81	7170.2	4128.03	3433.37	3732.24	5799.2	4782.15	9674.29	4427.11	5687.16	5396.77	6862.14	4128.03	5292.97	3376.89	4610.48	4832.66	x	x	x	x	HMDB0062243	7Z-tetradecenoic acid	M+Na	C14H26O2	38.1	3.75	8.03955	95.5863	http://nonlinear.com/redirect/outbound?p=hmdb&param=HMDB0062243	0.0248046	1.58214
	9.26_273.1841m/z		273.184	1	9.26018	0.19315	44	0.805528	1.38639	Ctrl	DENV	100 - 13.8	4626.29	10.61	5354.92	4508.38	4652.79	3979.26	4636.11	3796.18	3596.96	3642.47	2169.4	3479.63	7998.96	4012	4714.54	3960.88	4436.92	3796.18	5545.16	3295.67	1724.72	3516.38	x	x	x	x	HMDB0039782	2-(1-Pentenyl)furan	2M+H	C9H12O	40	7.3	-2.96647	96.0655	http://nonlinear.com/redirect/outbound?p=hmdb&param=HMDB0039782	0.0171489	1.52871
	3.37_265.1052m/z		265.105	1	3.36793	0.08565	20	0.805528	1.39973	Ctrl	DENV	100 - 8.12	4366.97	12.12	3283.2	4425.17	5331.84	4413.52	4381.11	2914.06	2643.28	3600.2	3381.58	3060.24	4904.3	3937.95	5402.61	4393.13	4192.87	2914.06	4074.94	3257.42	2688.42	3092.56	x	x	x	x	CSID8459	1,5-Diphenylcarbazide	M+Na	C13H14N4O	38.2	2.7	-3.26443	92.3481	http://nonlinear.com/redirect/outbound?p=chemspider&param=8459	0.00829495	1.49541
	3.65_300.2266m/z		300.227	1	3.64562	0.06425	1	0.805528	1.40007	Ctrl	DENV	100 - 26.6	2475.15	19.88	3082.43	2198.13	2044.79	2117.61	2932.81	1773.68	2257.01	1807.89	1265.69	1735.12	4604.4	1956.11	2071.93	2107.83	2806.8	1773.68	3479.46	1635.76	1006.25	1753.45	x	x	x	x	CSID391247	6-[8-Hydroxy-1-(hydroxymethyl)octahydro-2H-quinolizin-3-yl]-2-piperidinone	M+NH4	C15H26N2O3	37.8	4.49	-5.58212	91.0982	http://nonlinear.com/redirect/outbound?p=chemspider&param=391247	0.0286152	1.05807
	9.50_369.2423m/z		369.242	1	9.50308	0.14945	18	0.805528	1.40915	Ctrl	DENV	100	4048.43	10.71	5589.8	3396.3	3824.04	3298.4	4133.63	2924.81	2767.45	3330.28	2478.68	2863.59	8349.81	3022.36	3874.79	3283.16	3956.03	2924.81	4266.38	3013.2	1970.6	2893.83	x	x	x	x	CSID10790457	2457	M+H	C24H32O3	37.2	9.85	-0.410803	76.4256	http://nonlinear.com/redirect/outbound?p=chemspider&param=10790457	0.0145437	1.37513
	2.88_235.1476m/z		235.148	1	2.88308	0.121567	12	0.805528	1.41471	Ctrl	DENV	100 - 63	4046.32	15.17	4821.53	3939.75	3284.22	3699.49	4486.58	3031.99	2626.89	4325.1	2394.2	1922.71	7202.21	3505.98	3327.81	3682.41	4293.82	3031.99	4049.68	3913.31	1903.44	1943.01	x	x	x	x	HMDB0015505	Glutethimide	M+NH4	C13H15NO2	33.8	15.6	15.9763	69.6874	http://nonlinear.com/redirect/outbound?p=hmdb&param=HMDB0015505	0.0379865	1.33964
	4.74_364.2946m/z		364.295	1	4.74428	0.121533	1	0.805528	1.41472	Ctrl	DENV	100 - 26.9	10748.1	8.5	10090.5	11569.7	9475.87	11330.6	11273.9	6978.56	8913.15	7708	9469.97	4917.03	15072.8	10295.8	9601.63	11278.3	10789.6	6978.56	13740.8	6974.12	7528.83	4968.96	x	x	x	x	CSID30791523	Istamycin C0	M+NH4	C16H34N4O4	36.6	0	7.91396	91.9718	http://nonlinear.com/redirect/outbound?p=chemspider&param=30791523	0.0164667	2.39089
	4.33_268.1296m/z		268.13	1	4.33097	0.1287	23	0.805528	1.4204	Ctrl	DENV	100 - 47.2	2346.03	9.87	2474.95	2661.22	2332.09	2077.97	2183.89	2172.77	1521.8	1906.86	1584.06	1072.86	3696.97	2368.22	2363.04	2068.38	2090.06	2172.77	2346.04	1725.31	1259.36	1084.2	x	x	x	x	HMDB0028734	Asparaginyl-Isoleucine	M+Na	C10H19N3O4	38.4	29.1	11.4407	75.4518	http://nonlinear.com/redirect/outbound?p=hmdb&param=HMDB0028734	0.0187985	1.10573
	6.30_639.4433m/z		639.443	1	6.29945	0.06425	9	0.805528	1.45457	Ctrl	DENV	100	3881.93	20.42	4941.97	3096.46	5086.99	3238.92	3045.32	2392.29	2735.31	3086.92	1889.91	3239.54	7382.11	2755.54	5154.51	3223.96	2914.48	2392.29	4216.82	2793.02	1502.52	3273.75	x	x	x	x	HMDB0060578	b-Dihydrotetrabenazine	2M+H	C19H29NO3	35.1	6.47	10.306	80.3726	http://nonlinear.com/redirect/outbound?p=hmdb&param=HMDB0060578	0.042496	1.3383
	10.76_366.2999m/z		366.3	1	10.7593	0.157667	10	0.805528	1.47951	Ctrl	DENV	100 - 60.1 - 49.7	3909.63	12.83	4720.56	4010.18	3634.88	3764.13	3418.41	3017.13	2934.78	2641.09	2097.35	2522.2	7051.37	3568.65	3683.12	3746.75	3271.54	3017.13	4524.34	2389.63	1667.44	2548.84	x	x	x	x	HMDB0029683	2-Hydroxy-6-pentadecylbenzoic acid	M+NH4	C22H36O3	34.7	14	-0.974141	60.7842	http://nonlinear.com/redirect/outbound?p=hmdb&param=HMDB0029683	0.00168837	1.58447
	9.26_291.1953m/z		291.195	1	9.26018	0.1289	9	0.805528	1.48789	Ctrl	DENV	100 - 19.5	6995.7	11.56	8007.1	7404.61	7218.94	6288.12	6059.72	5486.16	4715.45	5649.34	2544.52	5113.29	11960.7	6589.35	7314.74	6259.07	5799.37	5486.16	7269.47	5111.46	2022.95	5167.29	x	x	x	x	CSID30790922	3-[(2E)-3,7-Dimethyl-2,6-octadien-1-yl]-5-methoxy-2-methyl-1,4-benzenediol	M+H	C18H26O3	40.9	7.9	-0.762453	97.4339	http://nonlinear.com/redirect/outbound?p=chemspider&param=30790922	0.0250722	2.03105
	3.37_179.1064m/z		179.106	1	3.36793	0.0927833	106	0.805528	1.5159	Ctrl	DENV	100	2001.03	15.78	1335.67	2194.77	2244.23	1991.27	2239.21	1270.24	1050.22	1616.44	1402.92	1260.34	1995.17	1953.12	2274.01	1982.08	2143.01	1270.24	1619.05	1462.54	1115.35	1273.65	x	x	x	x	HMDB0040800	2-Ethoxy-5-(1-propenyl)phenol	M+H	C11H14O2	38.7	7	-1.44959	88.3257	http://nonlinear.com/redirect/outbound?p=hmdb&param=HMDB0040800	0.0100411	1.10938
	9.92_333.2414m/z		333.241	1	9.92425	0.0713833	29	0.805528	1.53161	Ctrl	DENV	100 - 22.3	1679.65	10.91	1829.37	1883.15	1453.7	1691.59	1540.46	995.773	1042.75	1371.76	1135.65	937.365	2732.63	1675.82	1472.99	1683.78	1474.28	995.773	1607.53	1241.15	902.866	947.265	x	x	x	x	HMDB0031060	(R)-2-Hydroxysterculic acid	M+Na	C19H34O3	39.1	4.36	4.4936	96.6042	http://nonlinear.com/redirect/outbound?p=hmdb&param=HMDB0031060	0.000803028	1.09299
	3.25_257.1377m/z		257.138	1	3.24643	0.107233	25	0.805528	1.54286	Ctrl	DENV	100 - 44.6	2270.07	14.59	2799.44	2372.36	2103.23	1958.96	2116.37	1519.82	1351.93	2479.18	1127.56	878.216	4181.68	2111.16	2131.14	1949.91	2025.44	1519.82	2084.17	2243.14	896.434	887.49	x	x	x	x	HMDB0013031	O2'-4a-cyclic-tetrahydrobiopterin	M+NH4	C9H13N5O3	39.2	28.9	8.58926	76.6414	http://nonlinear.com/redirect/outbound?p=hmdb&param=HMDB0013031	0.0290295	1.11826
	9.26_309.2056m/z		309.206	1	9.26018	0.121767	28	0.805528	1.544	Ctrl	DENV	100	3296.88	9.64	3673.12	3567.31	3264.15	2980.01	2999.79	2539.47	2133.55	2458.76	1271.35	2273.3	5486.76	3174.54	3307.47	2966.25	2870.91	2539.47	3289.14	2224.66	1010.75	2297.31	x	x	x	x	HMDB0040285	Anapear	2M+H	C9H14O2	37.8	0.603	-1.43148	90.2309	http://nonlinear.com/redirect/outbound?p=hmdb&param=HMDB0040285	0.00879111	1.50581
	8.67_323.2213m/z		323.221	1	8.66752	0.114417	12	0.805528	1.55932	Ctrl	DENV	100 - 22	5787.97	8.57	6024.43	6505.49	5529.4	5670.02	5210.52	3691.83	3752.58	5339.44	2735.75	3039.71	8999.04	5789.22	5602.79	5643.83	4986.65	3691.83	5785.08	4831.07	2174.98	3071.81	x	x	x	x	HMDB0033615	(S)-[8]-Gingerol	M+H	C19H30O4	40.3	5.9	-1.09961	96.6931	http://nonlinear.com/redirect/outbound?p=hmdb&param=HMDB0033615	0.00462351	1.99873
	8.67_305.2108m/z		305.211	1	8.66752	0.100133	38	0.805528	1.57045	Ctrl	DENV	100 - 20	3570.31	9.26	3786.7	4020.29	3338.32	3494.3	3211.95	2273.87	2395.77	3261.56	1584.46	1851.47	5656.41	3577.65	3382.62	3478.16	3073.95	2273.87	3693.39	2951.03	1259.68	1871.02	x	x	x	x	HMDB0060089	w Hydroxy testosterone	M+H	C19H28O3	40.5	6.83	-0.896682	96.8435	http://nonlinear.com/redirect/outbound?p=hmdb&param=HMDB0060089	0.00604023	1.57247
	2.23_236.1519n	236.152	254.147	1	2.23385	0.235767	6	0.805528	1.58402	Ctrl	DENV	100 - 35.8 - 17.7	56186.9	28.83	84453.3	43543.7	48475.1	52024.6	52437.6	28112.2	28786.8	66795.4	28383.7	25277.5	126153	38749.4	49118.5	51784.3	50184.7	28112.2	44378.5	60435.8	22565.7	25544.5	x	x	x	x	HMDB0139525	N-(4-aminobutyl)-3-(4-hydroxyphenyl)propanimidic acid	M+H, M+NH4	C13H20N2O2	37.3	13.5	-2.55957	75.8695	http://nonlinear.com/redirect/outbound?p=hmdb&param=HMDB0139525	0.0437841	5.22517
	3.37_138.1071n	138.107	277.186	1	3.36793	0.08565	16	0.805528	1.58651	Ctrl	DENV	100 - 30.8	2154.02	12.83	2614.24	1902.2	2006.72	2065.88	2181.07	1348.92	1223.47	2041.81	1270.35	904.003	3905.05	1692.77	2033.35	2056.34	2087.36	1348.92	1886.13	1847.41	1009.95	913.55	x	x	x	x	HMDB0036092	exo-2-Methyl-3-methylenebicyclo[2.2.1]heptan-2-ol	M+Na, 2M+H	C9H14O	34.9	9.78	18.9421	83.6301	http://nonlinear.com/redirect/outbound?p=hmdb&param=HMDB0036092	0.00849919	1.20511
	10.71_362.3061m/z		362.306	1	10.7091	0.1075	5	0.805528	1.61055	Ctrl	DENV	100 - 23.4 - 20.5 - 6.07	1533.54	7.03	1629.48	1670.75	1441.59	1468.63	1457.23	1282.43	769.312	1123.77	455.824	1129.59	2434.05	1486.8	1460.72	1461.85	1394.62	1282.43	1185.99	1016.77	362.39	1141.52	x	x	x	x	CSID4451487	8561	M+NH4	C23H36O2	38.6	11.9	2.13892	83.7696	http://nonlinear.com/redirect/outbound?p=chemspider&param=4451487	0.0228672	1.03715
	11.29_382.3303m/z		382.33	1	11.2872	0.128717	6	0.805528	1.62761	Ctrl	DENV	100 - 50.5	5748.47	12.45	6001.94	6350.55	4794.3	6391.94	5203.63	4834.39	2667.99	3525.77	2840.34	3790.74	8965.44	5651.35	4857.93	6362.41	4980.06	4834.39	4113.04	3190.08	2258.13	3830.78	x	x	x	x	HMDB0032093	4-Hydroxy-3-(16-methylheptadecyl)-2H-pyran-2-one	M+NH4	C23H40O3	38	12.7	-3.37004	81.1396	http://nonlinear.com/redirect/outbound?p=hmdb&param=HMDB0032093	0.00314884	2.0861
	3.75_232.1448n	232.145	250.179	1	3.75292	0.0930167	49	0.805528	1.6759	Ctrl	DENV	100 - 28.9 - 7.17 - 0.253	3262.76	19.95	4376.16	3014.57	2897.8	2752.43	3272.86	2051.8	1697.09	3490.14	1686.28	809.058	6536.93	2682.66	2936.26	2739.71	3132.25	2051.8	2616.28	3157.84	1340.63	817.602	x	x	x	x	HMDB0040981	(7b,10a)-3-Hydroxy-1,3,5-cadinatrien-9-one	M+NH4, M+Na	C15H20O2	41.4	27.8	-6.78269	86.8106	http://nonlinear.com/redirect/outbound?p=hmdb&param=HMDB0040981	0.0403967	1.42637
	5.34_278.2121m/z		278.212	1	5.34377	0.128667	14	0.805528	1.74048	Ctrl	DENV	100 - 10.8	1626.23	26.62	2396.45	1526.53	1269.36	1292.59	1646.22	972.993	1087.72	1244.47	671.891	694.705	3579.71	1358.46	1286.2	1286.62	1575.49	972.993	1676.86	1125.98	534.168	702.042	x	x	x	x	CSID9283219	(8E,10E,12S)-8,10-Heptadecadiene-4,6-diyne-1,12-diol	M+NH4	C17H24O2	40.5	13.8	2.25298	91.6014	http://nonlinear.com/redirect/outbound?p=chemspider&param=9283219	0.0107267	1.08022
	8.77_234.0038m/z		234.004	1	8.7748	0.114217	1	0.805528	1.747	Ctrl	DENV	100 - 12.9 - 8.28	3071.82	22	4189.77	3066.47	2395.43	2741.91	2965.52	1760.28	1935.44	1179.22	2366.25	1550.54	6258.51	2728.84	2427.22	2729.25	2838.1	1760.28	2983.73	1066.94	1881.22	1566.91	x	x	x	x	CSID10889	diloxanide	M+H	C9H9Cl2NO2	28.5	1.27	-19.5219	60.42	http://nonlinear.com/redirect/outbound?p=chemspider&param=10889	0.00510449	1.5548
	2.01_223.1426m/z		223.143	1	2.00573	0.12085	26	0.805528	1.74845	Ctrl	DENV	100 - 32.8	12652.4	31.93	19345.4	8419.48	12435.4	11532.9	11529.1	5205.55	5604.98	15993.9	5322.97	4054.54	28897.4	7492.48	12600.4	11479.6	11033.7	5205.55	8640.78	14471.1	4231.87	4097.36	x	x	x	x	HMDB0041901	Hexamethylene bisacetamide	M+Na	C10H20N2O2	39.3	18.3	4.45848	83.56	http://nonlinear.com/redirect/outbound?p=hmdb&param=HMDB0041901	0.0430487	2.65333
	6.90_181.1218m/z		181.122	1	6.89875	0.10015	50	0.805528	1.75306	Ctrl	DENV	100 - 5.45 - 5.35	1934.29	16.79	1888.8	2878	1726.85	1783.84	1393.98	1092.73	1360.01	954.1	906.184	1203.9	2821.41	2561.13	1749.77	1775.6	1334.09	1092.73	2096.63	863.26	720.436	1216.61	x	x	x	x	HMDB0030039	Jasmolone	M+H	C11H16O2	42.6	25.5	-2.71239	90.6651	http://nonlinear.com/redirect/outbound?p=hmdb&param=HMDB0030039	0.0046765	1.20094
	9.43_233.1530m/z		233.153	1	9.4317	0.0999333	113	0.805528	1.81879	Ctrl	DENV	100 - 10.3	1640.66	15.57	1931.48	1824.7	1658.83	1292.61	1495.69	1058.87	1191.99	673.108	488.687	1097.64	2885.16	1623.8	1680.85	1286.64	1431.42	1058.87	1837.61	609.021	388.516	1109.24	x	x	x	x	HMDB0036766	Furanogermenone	M+H	C15H20O2	48.3	51.3	-2.65601	93.1873	http://nonlinear.com/redirect/outbound?p=hmdb&param=HMDB0036766	0.00865199	1.19318
	10.12_301.2509m/z		301.251	1	10.1163	0.0778167	6	0.805528	1.89928	Ctrl	DENV	100 - 10.9 - 17.8	1555	40.82	913.528	2268.27	891.472	1444.21	2257.5	602.769	758.155	644.987	1407.76	679.976	1364.59	2018.53	903.303	1437.54	2160.5	602.769	1168.79	583.578	1119.2	687.158	x	x	x	x	HMDB0033609	2-Pentadecylfuran	M+Na	C19H34O	37	6.56	2.73581	81.5014	http://nonlinear.com/redirect/outbound?p=hmdb&param=HMDB0033609	0.0441142	1.02141
	4.02_284.1668m/z		284.167	1	4.01737	0.0785167	23	0.805528	1.90391	Ctrl	DENV	100 - 22.6 - 7.92	3332.26	32.42	5165.29	2470.65	2760.88	2849.2	3415.29	1239.86	1451.24	3849.31	1155.95	1054.75	7715.69	2198.62	2797.52	2836.04	3268.55	1239.86	2237.27	3482.82	919.003	1065.89	x	x	x	x	HMDB0028953	Lysyl-Histidine	M+H	C12H21N5O3	41.5	35.4	-17.2088	89.4036	http://nonlinear.com/redirect/outbound?p=hmdb&param=HMDB0028953	0.0250454	1.50661
	3.85_250.1749m/z		250.175	1	3.85302	0.07155	8	0.805528	1.91644	Ctrl	DENV	100 - 31	2511.71	36.65	4047.73	1589.74	2303.36	2144.38	2473.32	1003.83	996.913	3091.08	931.183	530.048	6046.33	1414.7	2333.93	2134.47	2367.06	1003.83	1536.87	2796.77	740.31	535.646	x	x	x	x	HMDB0029065	Threoninyl-Leucine	M+NH4	C10H20N2O4	39.2	17.5	-5.21401	84.3966	http://nonlinear.com/redirect/outbound?p=hmdb&param=HMDB0029065	0.0411774	1.26303
	9.43_249.1489m/z		249.149	1	9.4317	0.0785167	64	0.805528	1.95037	Ctrl	DENV	100 - 17.5	2370.5	21	2527.68	2372.44	3114.64	1968.88	1868.84	1419.89	1734.67	1225.18	324.036	1373.26	3775.75	2111.23	3155.97	1959.78	1788.55	1419.89	2674.21	1108.53	257.615	1387.76	x	x	x	x	HMDB0035131	Heliannuol C	M+H	C15H20O3	43.3	20.8	1.53752	97.5291	http://nonlinear.com/redirect/outbound?p=hmdb&param=HMDB0035131	0.0371801	1.45089
	2.95_248.1619m/z		248.162	1	2.95447	0.0999333	26	0.805528	1.9544	Ctrl	DENV	100 - 27.3	5473.18	38.14	8828.48	3215.43	4673.05	4883.93	5764.98	2140.64	1988.79	6842.83	2078.58	951.316	13187.6	2861.4	4735.07	4861.38	5517.3	2140.64	3065.97	6191.32	1652.51	961.362	x	x	x	x	HMDB0029128	Valyl-Hydroxyproline	M+NH4	C10H18N2O4	41.4	27.5	6.3675	86.805	http://nonlinear.com/redirect/outbound?p=hmdb&param=HMDB0029128	0.0472959	1.87031
	8.37_689.3492m/z		689.349	1	8.3682	0.221533	6	0.805528	1.95452	Ctrl	DENV	100 - 7.23	6418.72	31.3	4002.24	8209.72	7896.04	4484.37	7501.24	2224.85	3676.68	2476.62	6105.42	1936.64	5978.38	7305.82	8000.84	4463.65	7178.95	2224.85	5668.07	2240.82	4853.94	1957.1	x	x	x	x	HMDB0033703	Coroloside	M+Na	C35H54O12	39.2	27.7	-2.34304	71.0459	http://nonlinear.com/redirect/outbound?p=hmdb&param=HMDB0033703	0.023747	2.23673
	3.67_277.1837m/z		277.184	1	3.67417	0.150117	26	0.805528	1.98177	Ctrl	DENV	100 - 19.4	3336.99	40.72	5711.53	2359.85	2635.65	2819.78	3158.14	1628.67	1445.81	3669.24	1063.74	611.774	8531.64	2100.03	2670.62	2806.76	3022.45	1628.67	2228.89	3319.89	845.693	618.235	x	x	x	x	HMDB0041201	Panaquinquecol 7	M+H	C17H24O3	40.8	21.2	14.0241	97.436	http://nonlinear.com/redirect/outbound?p=hmdb&param=HMDB0041201	0.0409833	1.50552
	7.87_403.2929n	403.293	421.306	1	7.86877	0.135833	1	0.805528	2.02589	Ctrl	DENV	100 - 25.3	29214.3	40.27	36466.5	12355.7	21287.2	37556.8	38405.7	10891.8	30102.8	9843.09	11544.8	9719.8	54472.1	10995.3	21569.7	37383.3	36755.6	10891.8	46407.2	8905.93	9178.4	9822.45	x	x	x	x	CSID28419934	Spergualin	M+H, M+NH4	C17H37N7O4	38.9	5.97	5.31803	94.4304	http://nonlinear.com/redirect/outbound?p=chemspider&param=28419934	0.0458195	4.63459
	8.15_340.2683m/z		340.268	1	8.1536	0.170817	7	0.805528	2.09627	Ctrl	DENV	100 - 3.1	2176.1	28.64	3412.55	979.297	2439.4	1536.45	2512.81	986.652	742.472	1422.79	1258.87	779.626	5097.53	871.475	2471.77	1529.35	2404.85	986.652	1144.61	1287.33	1000.83	787.86	x	x	x	x	CSID22875241	Templetine	M+Na	C20H35N3	33.7	0	-12.5661	81.9095	http://nonlinear.com/redirect/outbound?p=chemspider&param=22875241	0.0268999	1.3364
	2.97_256.1334m/z		256.133	1	2.96875	0.192017	23	0.805528	2.23635	Ctrl	DENV	100 - 31.4 - 3.41	14727.7	31.45	21847.8	8958.2	13618.4	14083.9	15130.2	4769.23	4615.44	16564.5	5224.4	1754.51	32635.4	7971.89	13799.1	14018.9	14480.2	4769.23	7115.29	14987.4	4153.5	1773.04	x	x	x	x	HMDB0034684	Thalictroidine	M+Na	C14H19NO2	39.6	23	11.0804	86.9914	http://nonlinear.com/redirect/outbound?p=hmdb&param=HMDB0034684	0.0280709	3.53249
	6.19_619.2667m/z		619.267	1	6.18505	0.17865	6	0.805528	2.34186	Ctrl	DENV	100 - 23.7	17892.2	27.62	8577.44	19275	26860.7	10352.6	24395.1	6964.62	10056.7	5918.62	9698.37	5562.59	12812.6	17152.8	27217.2	10304.8	23347	6964.62	15503.6	5355.11	7710.41	5621.33	x	x	x	x	HMDB0029103	Tyrosyl-Glutamine	2M+H	C14H19N3O5	36.9	1.86	-8.94083	92.3709	http://nonlinear.com/redirect/outbound?p=hmdb&param=HMDB0029103	0.0170188	4.0666
	0.84_149.0496n	149.05	167.092	1	0.842117	0.121333	17	0.805528	2.51206	Ctrl	DENV	100 - 9.3 - 2.53	20515.8	49.51	5906.32	29598.4	30548	19997.7	16528.7	6084.34	5143.43	9557.4	15657.9	4391.5	8822.61	26339.5	30953.4	19905.3	15818.6	6084.34	7929.25	8647.44	12448.4	4437.88	x	x	x	x	HMDB0004058	5,6-Dihydroxyindole	M+H, M+NH4	C8H7NO2	40.8	19	12.8201	98.3297	http://nonlinear.com/redirect/outbound?p=hmdb&param=HMDB0004058	0.0461935	4.35327
	8.38_561.2174m/z		561.217	1	8.38248	0.0785167	12	0.805528	2.51278	Ctrl	DENV	100 - 35.9 - 5.04	1425.63	18.8	1099.85	1288.11	1522.35	1815.89	1401.93	146.114	1241.63	84.8803	1185.51	178.615	1642.9	1146.29	1542.55	1807.5	1341.7	146.114	1914.14	76.7988	942.502	180.501	x	x	x	x	HMDB0000706	Aspartylphenylalanine	2M+H	C13H16N2O5	36.2	1.42	-3.05863	83.0662	http://nonlinear.com/redirect/outbound?p=hmdb&param=HMDB0000706	0.030427	1.20242
	8.38_713.3422m/z		713.342	1	8.38248	0.09995	3	0.805528	2.55097	Ctrl	DENV	100 - 24.7	4859.54	41.29	2011.18	6406.93	6287.88	3464.51	6127.18	942.375	1751.38	909.29	5215.22	706.614	3004.22	5701.52	6371.33	3448.51	5863.92	942.375	2699.98	822.716	4146.21	714.077	x	x	x	x	HMDB0034195	Convalloside	M+H	C35H52O15	37.5	12.2	5.99769	82.0412	http://nonlinear.com/redirect/outbound?p=hmdb&param=HMDB0034195	0.0274284	2.10974
	4.28_279.2060m/z		279.206	1	4.28078	0.157267	20	0.805528	2.71418	Ctrl	DENV	100 - 54.4	6691.16	52.22	12642.3	3391.55	5469.29	6087.33	5865.35	1194.32	1976.44	7353.84	1100.35	701.345	18884.5	3018.14	5541.88	6059.21	5613.35	1194.32	3046.94	6653.68	874.803	708.751	x	x	x	x	CSID20049402	Acrifoline	M+NH4	C16H23NO2	36.2	9.07	-2.8405	75.402	http://nonlinear.com/redirect/outbound?p=chemspider&param=20049402	0.022314	2.43027
	7.90_687.3263m/z		687.326	1	7.90447	0.107083	2	0.805528	2.72837	Ctrl	DENV	100 - 29.2	7619.26	48.66	3178.85	8965.69	11255	4178.77	10518	1514.09	2568.14	1529.17	7322.31	1029.3	4748.43	7978.55	11404.3	4159.47	10066.1	1514.09	3959.12	1383.58	5821.39	1040.17	x	x	x	x	CSID34111	EL9885000	2M+H	C17H26ClNO4	31.2	0	13.1312	69.7166	http://nonlinear.com/redirect/outbound?p=chemspider&param=34111	0.0273959	2.69331
	3.24_276.2156m/z		276.216	1	3.23928	0.0785167	7	0.805528	2.96631	Ctrl	DENV	100 - 6.46	1757.88	79.39	4154.38	1419.05	484.411	1412.37	1319.21	1.1096	3.89177	2958.08	0	0	6205.64	1262.81	490.84	1405.84	1262.53	1.1096	5.99965	2676.44	0	0	x	x	x	x	HMDB0059946	2-Hydroxypropyl 2-isopropyl-5-methylcyclohexyl carbonate	M+NH4	C14H26O4	38.7	9.06	-5.08252	90.4294	http://nonlinear.com/redirect/outbound?p=hmdb&param=HMDB0059946	0.00997485	1.08344
	0.85_139.0970m/z		139.097	1	0.849267	0.0785167	5	0.805528	3.04293	Ctrl	DENV	100	1520.89	52.38	332.352	2231.69	2243.25	1584.71	1212.43	333.814	328.085	551.04	1135.73	150.374	496.454	1985.97	2273.02	1577.39	1160.34	333.814	505.784	498.575	902.933	151.962	x	x	x	x	CSID60128	4,5-Pyrimidinediamine,N5,2-dimethyl-	M+H	C6H10N4	39.9	13.8	-5.6866	92.2907	http://nonlinear.com/redirect/outbound?p=chemspider&param=60128	0.0456474	1.26698
	1.06_563.2220m/z		563.222	1	1.05567	0.4353	12	0.805528	9.02932	Ctrl	DENV	100 - 31.6 - 14.8 - 4.73	169853	40.78	11340.3	180015	423888	165914	68108.1	15186.5	24878.2	29045.1	12019.4	12927.3	16939.7	160195	429514	165147	65181.9	15186.5	38352.9	26279.7	9555.68	13063.8	x	x	x	x	HMDB0041884	Doxorubicinol	M+NH4	C27H31NO11	39	6.83	-2.84001	91.3348	http://nonlinear.com/redirect/outbound?p=hmdb&param=HMDB0041884	0.0269897	14.5588
[truncated: 1 more columns]

## Sheet: DENV_Brain
															Normalised abundance										Raw abundance
															Ctrl					DENV					Ctrl					DENV					Tags
	Compound	Neutral mass (Da)	m/z	Charge	Retention time (min)	Chromatographic peak width (min)	Identifications	q Value	Max Fold Change	Highest Mean	Lowest Mean	Isotope Distribution	Maximum Abundance	Minimum CV%	Ctrl-1_neg	Ctrl-2_neg	Ctrl-3_neg	Ctrl-4_neg	Ctrl-5_neg	DENV-1_neg	DENV-2_neg	DENV-3_neg	DENV-4_neg	DENV-5_neg	Ctrl-1_neg	Ctrl-2_neg	Ctrl-3_neg	Ctrl-4_neg	Ctrl-5_neg	DENV-1_neg	DENV-2_neg	DENV-3_neg	DENV-4_neg	DENV-5_neg	DENV vs Ctrl VIP>1	Minimum CV <= 30	DENV vs Ctrl Anova p-value <= 0.05	DENV vs Ctrl	Accepted Compound ID	Accepted Description	Adducts	Formula	Score	Fragmentation Score	Mass Error (ppm)	Isotope Similarity	Compound Link	Anova (p)	VIP
neg	0.69_277.0732n	277.073	276.066	1	0.687183	0.0499667	1	1	1.19084	DENV	Ctrl	100 - 26.2 - 31.5 - 5.39 - 6.8 - 4.62 - 8.65 - 3.62	1187.26	8.3	1140.35	833.872	1056.35	902.554	1051.85	1289.12	1173.1	1149.46	1275.46	1049.17	1106.2	1028.69	1596.95	1028.96	679.811	1365.91	1329.41	874.335	1462.35	1387.72	x	x	x	x	CSID50494	PELRINONE HYDROCHLORIDE	M-H, 2M-H	C12H11ClN5O	35.9	0	0.628792	80.4824	http://nonlinear.com/redirect/outbound?p=chemspider&param=50494	0.0317023	1.04673
	1.07_493.0460n	493.046	538.069	1	1.07233	0.256983	1	1	1.2225	Ctrl	DENV	100 - 52.5 - 63.2	2388.51	8.8	2281.22	2226.58	2071.84	2746.24	2616.66	1734	1825.07	2028.28	2019.23	2162.33	2212.91	2746.77	3132.13	3130.85	1691.15	1837.3	2068.25	1542.81	2315.11	2860.07	x	x	x	x	CSID4445561	flucloxacillin sodium monohydrate	M-H, M+FA-H	C19H18ClFN3NaO6S	33.1	0	-5.33329	71.5863	http://nonlinear.com/redirect/outbound?p=chemspider&param=4445561	0.0166057	1.62138
	1.21_535.0236m/z		535.024	1	1.20857	0.157867	4	1	1.23904	Ctrl	DENV	100 - 27.1 - 27.2 - 14.8 - 0.633 - 0.6	3075.68	5.33	3186.88	3012.1	2897.9	3701.14	2580.36	2340.71	2457.04	2580.35	2379.99	2653.47	3091.46	3715.82	4380.94	4219.49	1667.69	2480.15	2784.43	1962.74	2728.73	3509.69	x	x	x	x	HMDB0015343	Ceftriaxone	M-H2O-H	C18H18N8O7S3	37.2	8.8	-8.28269	86.6009	http://nonlinear.com/redirect/outbound?p=hmdb&param=HMDB0015343	0.0114036	1.91086
	9.72_557.3214m/z		557.321	1	9.71843	0.27145	5	1	1.25311	Ctrl	DENV	100 - 25 - 4.66 - 0.459 - 0.00757	14377.9	5.27	13275.1	13923.5	14761.2	14828	15101.9	11879.3	8075.71	13854.5	11775.1	11784.2	12877.6	17176.5	22315.4	16904.7	9760.37	12587	9151.75	10538.4	13500.6	15586.7	x	x	x	x	HMDB0013889	E-10-Hydroxynortriptyline	2M-H	C19H21NO	37.4	0	7.19107	95.0549	http://nonlinear.com/redirect/outbound?p=hmdb&param=HMDB0013889	0.0323779	4.1806
	0.81_293.0649m/z		293.065	1	0.808533	0.0430333	29	1	1.34274	Ctrl	DENV	100 - 14.6	1135.72	10.24	1249.73	942.351	1131.62	1166.56	1188.35	762.353	1035.19	995.195	901.516	534.846	1212.31	1162.51	1710.74	1329.93	768.033	807.769	1173.13	756.993	1033.61	707.43	x	x	x	x	HMDB0126429	6-(4-ethenyl-3-hydroxyphenoxy)-3,4,5-trihydroxyoxane-2-carboxylic acid	M-H2O-H	C14H16O8	39.6	8.02	-5.73467	96.568	http://nonlinear.com/redirect/outbound?p=hmdb&param=HMDB0126429	0.0400562	1.30426
	5.09_369.2270m/z		369.227	1	5.08622	0.12065	12	1	1.37677	Ctrl	DENV	100 - 20.8 - 0.633	1180.97	12.07	1113.3	1078.45	1080.75	1217.05	1415.27	942	605.698	760.188	1227.87	753.142	1079.96	1330.4	1633.85	1387.5	914.695	998.118	686.404	578.235	1407.79	996.166	x	x	x	x	HMDB0031007	1-Acetoxy-2-hydroxy-16-heptadecyn-4-one	M+FA-H	C19H32O4	38.6	0	-4.04286	97.7179	http://nonlinear.com/redirect/outbound?p=hmdb&param=HMDB0031007	0.0297367	1.35412
	2.17_297.0874n	297.087	342.086	1	2.174	0.0930333	3	1	1.3991	Ctrl	DENV	100 - 12.3 - 2.32	881.015	21.65	1151.16	839.018	603.559	978.383	832.959	592.964	505.95	587.968	597.559	864.075	1116.69	1035.04	912.439	1115.41	538.344	628.289	573.364	447.237	685.119	1142.9	x	x	x	x	HMDB0001173	5'-Methylthioadenosine	M-H, M+FA-H	C11H15N5O3S	38.8	7.99	-7.13194	94.1939	http://nonlinear.com/redirect/outbound?p=hmdb&param=HMDB0001173	0.0447602	1.15379
pos	2.39_457.0441m/z		457.044	1	2.39483	0.0928167	1	0.893446	19.8734	DENV	Ctrl	100	603.966	178.24	0.493241	127.048	6.71841	6.40993	11.2832	19.5096	86.6489	197.057	171.996	2544.62	0.520546	252.522	12.3164	8.50401	10.5504	16.2391	151.197	171.598	196.898	4368.99	x	x	x	x	CSID64972	Lofemizole hydrochloride	2M+H	C10H9Cl2N2	26.9	0	-16.3263	51.1585	http://nonlinear.com/redirect/outbound?p=chemspider&param=64972	0.0300705	1.32264
	1.29_365.1120m/z		365.112	1	1.28807	0.19505	9	0.893446	2.48641	DENV	Ctrl	100 - 13.5 - 5.23	574.315	11.42	193.687	134.286	164.715	131.845	530.373	604.041	489.806	650.749	602.861	524.116	204.409	266.908	301.961	174.918	495.927	502.78	854.683	566.674	690.145	899.883	x	x	x	x	CSID391826	Oxysanguinarine	M+NH4	C20H13NO5	39.9	12.2	-3.31944	91.3657	http://nonlinear.com/redirect/outbound?p=chemspider&param=391826	0.0036715	1.50449
	9.79_271.2620m/z		271.262	1	9.7936	0.506633	11	0.893446	1.95589	DENV	Ctrl	100 - 74.6 - 31.4	1084.42	31.55	292.367	369.754	625.411	669.03	815.632	1424.75	1076.5	1327.23	1049.74	543.874	308.552	734.923	1146.52	887.598	762.658	1185.91	1878.42	1155.76	1201.73	933.807	x	x	x	x	HMDB0002259	Heptadecanoic acid	M+H	C17H34O2	30.7	0	-4.43814	58.6455	http://nonlinear.com/redirect/outbound?p=hmdb&param=HMDB0002259	0.0280021	1.73803
	9.10_271.2659m/z		271.266	1	9.10113	0.47085	11	0.893446	1.86301	DENV	Ctrl	100 - 48.2 - 16.7	1072.75	34.23	352.786	428.786	424.148	781.128	892.232	1480.18	991.609	1315.83	1057.82	518.33	372.316	852.256	777.56	1036.32	834.284	1232.04	1730.3	1145.83	1210.97	889.949	x	x	x	x	HMDB0002259	Heptadecanoic acid	M+H	C17H34O2	32.5	0	10.0625	73.2535	http://nonlinear.com/redirect/outbound?p=hmdb&param=HMDB0002259	0.0404957	1.61974
	0.78_253.0621n	253.062	507.12	1	0.784333	0.11525	2	0.893446	1.78353	DENV	Ctrl	100 - 12.5 - 14.4	651.787	30.51	482.313	271.438	297.647	283.966	491.874	790.717	718.522	864.182	473.501	412.014	509.013	539.511	545.656	376.736	459.928	658.162	1253.78	752.532	542.056	707.41	x	x	x	x	HMDB0039506	N-Salicyloylaspartic acid	M+H, 2M+H	C11H11NO6	35.1	0	13.6136	89.993	http://nonlinear.com/redirect/outbound?p=hmdb&param=HMDB0039506	0.0199511	1.265
	12.48_311.2543m/z		311.254	1	12.4839	0.18735	2	0.893446	1.60943	DENV	Ctrl	100 - 3.8	960.7	20.5	462.952	589.352	516.571	781.328	634.396	1174.84	516.776	959.724	961.646	1190.52	488.581	1171.4	946.992	1036.58	593.193	977.889	901.744	835.731	1100.88	2044.06	x	x	x	x	HMDB0031060	(R)-2-Hydroxysterculic acid	M+H	C19H34O3	34.5	1.59	-12.1625	83.6801	http://nonlinear.com/redirect/outbound?p=hmdb&param=HMDB0031060	0.0338219	1.41527
	0.68_209.0802n	209.08	227.114	1	0.683333	0.0938667	7	0.893446	1.32749	DENV	Ctrl	100 - 11.9 - 0.394	4224.8	14.72	3319.69	2752.03	2663.04	3397.42	3780.56	4724.79	3949.41	5110.9	3853.97	3484.93	3503.46	5469.93	4881.96	4507.33	3535.02	3932.73	6891.49	4450.59	4411.96	5983.46	x	x	x	x	HMDB0060384	4-Acetamido-2-amino-6-nitrotoluene	M+H, M+NH4, M+Na	C9H11N3O3	41.8	11.3	0.635607	98.5603	http://nonlinear.com/redirect/outbound?p=hmdb&param=HMDB0060384	0.0192418	2.42236
	0.68_198.0874m/z		198.087	1	0.683333	0.0722333	22	0.893446	1.32627	DENV	Ctrl	100 - 13.9 - 0.911	2219.44	17.5	1703.75	1474.98	1295.97	1871.33	2021.17	2617.1	1958.63	2711.66	1999.41	1810.39	1798.07	2931.67	2375.81	2482.68	1889.89	2178.37	3417.69	2361.32	2288.9	3108.36	x	x	x	x	HMDB0032055	N-Acetylhistidine	M+H	C8H11N3O3	41.7	12.5	0.241785	96.4561	http://nonlinear.com/redirect/outbound?p=hmdb&param=HMDB0032055	0.0397625	1.67575
	10.44_265.1770m/z		265.177	1	10.4428	1.21318	15	0.893446	1.25465	DENV	Ctrl	100 - 23.4 - 20.6	4904.05	8.1	3628.81	4183.78	3728.17	3305.28	4697.43	5139.61	4814.44	5261.19	4256.53	5048.46	3829.7	8315.68	6834.59	4385.1	4392.34	4278.02	8400.93	4581.46	4872.81	8667.97	x	x	x	x	HMDB0010730	3-Oxotetradecanoic acid	M+Na	C14H26O3	46.1	51.2	-1.55841	81.378	http://nonlinear.com/redirect/outbound?p=hmdb&param=HMDB0010730	0.0119245	2.45047
	11.58_287.2004m/z		287.2	1	11.5774	0.235083	28	0.893446	1.23687	DENV	Ctrl	100 - 12.1 - 9.9	1491.44	12.93	1182.08	1106.9	1081.65	1125.71	1532.75	1633.31	1358.77	1758.7	1379.33	1327.08	1247.52	2200.08	1982.91	1493.47	1433.2	1359.51	2370.98	1531.48	1579.04	2278.53	x	x	x	x	CSID219236	1-Methylestradiol	M+H	C19H26O2	43.3	29.8	-0.592881	87.4464	http://nonlinear.com/redirect/outbound?p=chemspider&param=219236	0.0357563	1.20783
	11.36_251.1558m/z		251.156	1	11.3559	0.756317	3	0.893446	1.23474	DENV	Ctrl	100 - 20.5 - 2.09	1420.34	11.06	1022.4	1214.75	1095.29	1010.13	1409.01	1491.24	1317.59	1629.7	1223.24	1439.93	1079	2414.43	2007.92	1340.14	1317.49	1241.25	2299.12	1419.14	1400.35	2472.29	x	x	x	x	CSID26309	Hopantenic acid	M+NH4	C10H19NO5	40.7	29.7	-18.7191	92.2567	http://nonlinear.com/redirect/outbound?p=chemspider&param=26309	0.027451	1.2092
	2.25_401.2502m/z		401.25	1	2.25207	0.149917	3	0.893446	1.1255	Ctrl	DENV	100 - 22.5 - 3.05	6919.62	6.91	7514.2	6259.47	6552.51	7529.97	6741.97	5492.14	5957.39	6432.32	6338.46	6519.82	7930.18	12441.3	12012.2	9989.97	6304.09	4571.45	10395.3	5601.29	7256.16	11194.2	x	x	x	x	HMDB0035076	2-(2-Methylpropoxy)naphthalene	2M+H	C14H16O	37.6	2.72	6.7402	92.9149	http://nonlinear.com/redirect/outbound?p=hmdb&param=HMDB0035076	0.0428951	1.99223
	2.34_617.3082m/z		617.308	1	2.33773	0.214167	3	0.893446	1.14773	Ctrl	DENV	53.7 - 100	2747.55	8.15	2657.15	2431.79	2737.48	2901.84	3009.49	2373.27	2206.11	2473.98	2722.32	2193.78	2804.25	4833.43	5018.43	3849.86	2814.03	1975.42	3849.53	2154.35	3116.47	3766.63	x	x	x	x	CSID4470526	GTS-21	2M+H	C19H20N2O2	30.3	21.6	-6.51053	37.1188	http://nonlinear.com/redirect/outbound?p=chemspider&param=4470526	0.034589	1.36768
	5.85_1071.2008m/z		1071.2	1	5.85485	0.107067	2	0.893446	1.23102	Ctrl	DENV	100	2902.25	3.79	2993.03	3007.28	2883.55	2894.48	2732.93	2163.69	2877.95	2160.52	2482.68	2103.19	3158.72	5977.27	5286.2	3840.08	2555.43	1800.97	5021.87	1881.39	2842.13	3611.08	x	x	x	x	HMDB0059635	Lipoyl-AMP	2M+H	C18H26N5O8PS2	33.9	0	1.32438	71.3023	http://nonlinear.com/redirect/outbound?p=hmdb&param=HMDB0059635	0.00834809	1.8361
	2.41_677.2036m/z		677.204	1	2.40912	0.11425	18	0.893446	1.38379	Ctrl	DENV	100 - 12.5	727.068	17.43	896.078	578.427	637.308	722.42	801.106	349.823	761.876	545.87	514.029	455.487	945.684	1149.68	1168.33	958.43	749.076	291.179	1329.43	475.345	588.451	782.05	x	x	x	x	HMDB0133622	3,4,5-trihydroxy-6-[(2Z)-3-oxo-2-(phenylmethylidene)propoxy]oxane-2-carboxylic acid	2M+H	C16H18O8	37.9	3.44	-5.88968	92.7486	http://nonlinear.com/redirect/outbound?p=hmdb&param=HMDB0133622	0.0490092	1.0019
	0.73_742.6773m/z		742.677	1	0.734067	0.0216333	1	0.893446	1.38635	Ctrl	DENV	100 - 51.7 - 66	988.94	9.55	1063.69	844.514	1072.82	1014.34	949.331	494.712	755.119	655.472	737.676	923.727	1122.58	1678.56	1966.72	1345.72	887.674	411.779	1317.64	570.787	844.479	1586	x	x	x	x	CSID14774	IOXYNIL	2M+H	C7H3I2NO	27.3	0	12.5123	49.8403	http://nonlinear.com/redirect/outbound?p=chemspider&param=14774	0.0152584	1.29425
	10.14_522.3552m/z		522.355	1	10.1358	0.242267	7	0.893446	1.40122	Ctrl	DENV	100 - 30.6 - 9.94 - 0.525	21754.4	15.83	20300.3	17312.7	24571.9	28794	17793.1	15383.6	11416.5	17550.4	17224.1	16051.7	21424.1	34410.8	45045.9	38200.7	16637.5	12804.8	19921.2	15282.9	19717.9	27560	x	x	x	x	HMDB0002815	LysoPC(18:1(9Z))	M+H	C26H52NO7P	47	39.8	-0.366039	95.8421	http://nonlinear.com/redirect/outbound?p=hmdb&param=HMDB0002815	0.0293972	5.75261
	9.34_544.3396m/z		544.34	1	9.34383	0.17155	5	0.893446	1.41766	Ctrl	DENV	100 - 33 - 7.65 - 1.1	8606.49	22.09	7679.11	8900.36	8634.44	11630.5	6188.03	4490.68	5504.3	7187.52	5445.75	7726.34	8104.22	17690.4	15828.9	15430.1	5786.13	3737.87	9604.69	6258.92	6234.2	13265.8	x	x	x	x	HMDB0010395	LysoPC(20:4(5Z,8Z,11Z,14Z))	M+H	C28H50NO7P	49.7	51	-0.230554	97.7248	http://nonlinear.com/redirect/outbound?p=hmdb&param=HMDB0010395	0.0411146	3.58823
	1.74_564.0555m/z		564.055	1	1.74108	0.426367	1	0.893446	1.42639	Ctrl	DENV	100 - 16.4	1461.29	18.13	1777.43	1154.12	1696.52	1312.22	1366.13	837.926	1565.49	889.243	1092.24	737.41	1875.83	2293.94	3110.11	1740.92	1277.4	697.457	2731.69	774.355	1250.38	1266.1	x	x	x	x	CSID8069241	GW4064	M+Na	C28H22Cl3NO4	25.4	0	8.83037	36.7999	http://nonlinear.com/redirect/outbound?p=chemspider&param=8069241	0.039873	1.48083
	0.74_196.8777m/z		196.878	1	0.7412	0.05755	2	0.893446	1.44033	Ctrl	DENV	100	1800.85	8.43	1916.16	1828.37	1860.11	1864.39	1535.24	775.416	1682.24	1007.53	1227.86	1558.47	2022.24	3634.07	3410.01	2473.47	1435.53	645.427	2935.4	877.362	1405.64	2675.82	x	x	x	x	CSID22858	Di-potassium monohydrogen phosphate	M+Na	HK2O4P	37	0	-1.14277	86.1612	http://nonlinear.com/redirect/outbound?p=chemspider&param=22858	0.0264757	1.78712
	2.34_950.2867m/z		950.287	1	2.34487	0.121367	4	0.893446	1.48058	Ctrl	DENV	100	978.44	15.43	1136.96	982.581	817.8	1119.27	835.59	384.138	939.024	754.98	691.051	535.055	1199.9	1952.98	1499.21	1484.93	781.32	319.742	1638.54	657.439	791.104	918.664	x	x	x	x	HMDB0003571	Lauroyl-CoA	M+H	C33H58N7O17P3S	31.7	0.0443	-2.99794	61.8551	http://nonlinear.com/redirect/outbound?p=hmdb&param=HMDB0003571	0.0349816	1.32256
	9.33_569.3427m/z		569.343	1	9.32955	0.149917	5	0.893446	1.48467	Ctrl	DENV	100 - 24.6 - 1.97	2495.59	17.25	2640.48	1943.67	2175.75	3831.67	1886.4	1577.19	1317.31	1763.52	1636.17	2110.38	2786.65	3863.25	3988.64	5083.45	1763.88	1312.8	2298.62	1535.68	1873.06	3623.42	x	x	x	x	HMDB0041547	Hovenidulcigenin B	M+Na	C32H50O7	45.3	43.3	-3.8996	87.704	http://nonlinear.com/redirect/outbound?p=hmdb&param=HMDB0041547	0.0399246	1.97211
	1.71_537.0975m/z		537.097	1	1.705	0.6406	8	0.893446	1.60269	Ctrl	DENV	100 - 26.8 - 5.28 - 0.024	3416.82	21.33	4389.94	2683.35	3975.2	3087.83	2947.79	1005.57	3715.27	1816.31	2383.17	1739.35	4632.96	5333.43	7287.44	4096.6	2756.34	836.997	6482.94	1581.65	2728.21	2986.39	x	x	x	x	CSID64286	Cefminox	M+NH4	C16H21N7O7S3	40.4	22.3	-5.40989	85.8164	http://nonlinear.com/redirect/outbound?p=chemspider&param=64286	0.0480242	2.53709
	0.85_364.0666m/z		364.067	1	0.849267	0.0940833	10	0.893446	1.60314	Ctrl	DENV	100 - 36.1 - 5.53	542.773	19.76	717.938	642.14	324.579	379.566	649.64	276.286	337.216	296.946	333.116	449.283	757.682	1276.32	595.028	503.568	607.447	229.97	588.422	258.581	381.346	771.398	x	x	x	x	CSID6545	Guanosine monophosphate	M+H	C10H14N5O8P	41.5	30.3	3.69621	81.466	http://nonlinear.com/redirect/outbound?p=chemspider&param=6545	0.0422638	1.02433
	2.34_660.6260m/z		660.626	1	2.34487	0.09995	1	0.893446	1.67789	Ctrl	DENV	100	602.472	29.8	710.608	501.953	332.699	729.883	737.214	293.267	515.68	411.291	356.222	218.861	749.946	997.683	609.913	968.331	689.334	244.104	899.833	358.153	407.797	375.774	x	x	x	x	HMDB0011767	Cer(d18:0/23:0)	M+Na	C41H83NO3	32.4	0	-0.748804	63.0403	http://nonlinear.com/redirect/outbound?p=hmdb&param=HMDB0011767	0.0418949	1.1387
	2.34_770.5641m/z		770.564	1	2.33773	0.0856667	14	0.893446	1.69399	Ctrl	DENV	100	719.21	26.64	827.407	679.62	375.654	813.657	899.711	267.899	581.921	459.225	411.163	402.617	873.212	1350.81	688.659	1079.47	841.277	222.989	1015.42	399.894	470.693	691.274	x	x	x	x	HMDB0008033	PC(18:0/15:0)	M+Na	C41H82NO8P	31.5	0	-3.89455	62.2943	http://nonlinear.com/redirect/outbound?p=hmdb&param=HMDB0008033	0.0346383	1.28038
	9.99_496.6645m/z		496.665	1	9.98633	0.0859167	1	0.893446	1.93958	Ctrl	DENV	100	1738.56	14.19	2062.06	1477.65	1863.36	1782.24	1507.5	575.927	637.568	1083.85	1170.61	1013.85	2176.21	2936.99	3415.97	2364.48	1409.59	479.38	1112.52	943.819	1340.09	1740.74	x	x	x	x	HMDB0040187	1,1-Dibromo-1-chloro-2-propanone	2M+H	C3H3Br2ClO	19.3	0	18.9715	15.1843	http://nonlinear.com/redirect/outbound?p=hmdb&param=HMDB0040187	0.00239636	2.41899
	1.86_454.0812m/z		454.081	1	1.85672	0.246167	3	0.893446	1.96225	Ctrl	DENV	100 - 34.7 - 1.99	1653.92	29.14	1532.6	1915.11	1549.55	2282.12	990.237	429.486	1040.66	1216.51	663.638	864.07	1617.44	3806.48	2840.68	3027.68	925.923	357.487	1815.88	1059.34	759.721	1483.57	x	x	x	x	HMDB0128898	{11,15-dimethoxy-13-oxo-6,8,20-trioxapentacyclo[10.8.0.0²,⁹.0³,⁷.0¹⁴,¹⁹]icosa-1(12),2(9),10,14,16,18-hexaen-4-yl}oxidanesulfonic acid	M+NH4	C19H16O10S	36.5	0	2.28373	85.2115	http://nonlinear.com/redirect/outbound?p=hmdb&param=HMDB0128898	0.0162701	2.19047
	2.34_771.0656m/z		771.066	1	2.33773	0.0856667	5	0.893446	2.12291	Ctrl	DENV	100	469.255	22.98	526.698	451.73	293.868	575.452	498.528	63.0907	360.508	268.609	202.941	210.069	555.855	897.86	538.726	763.449	466.149	52.5143	629.066	233.905	232.324	360.678	x	x	x	x	HMDB0134690	2,3,4,7,8,9,15,21,22,23,28-undecahydroxy-14-(hydroxymethyl)-12,27,31,34-tetraoxo-13,25,32,35-tetraoxaoctacyclo[14.13.3.3¹⁷,²⁶.0⁵,³⁰.0⁶,¹¹.0¹⁸,²⁶.0¹⁹,²⁴.0²⁹,³³]pentatriaconta-1,3,5(30),6,8,10,19,21,23,28-decaene-20-carboxylic acid	M+H	C33H22O22	32.7	0	-2.55327	66.333	http://nonlinear.com/redirect/outbound?p=hmdb&param=HMDB0134690	0.026109	1.24601
	1.01_343.0233m/z		343.023	1	1.00803	0.0576333	7	0.893446	3.86891	Ctrl	DENV	100 - 11.4	510.193	16.15	328.018	282.013	502.856	1317.95	120.132	110.772	149.49	150.854	107.112	141.121	346.177	560.53	921.849	1748.51	112.33	92.2028	260.852	131.364	122.62	242.298	x	x	x	x	CSID2314551	Ranelic acid	M+H	C12H10N2O8S	41.3	17.2	0.827383	90.4068	http://nonlinear.com/redirect/outbound?p=chemspider&param=2314551	0.0293415	1.26714
[truncated: 1 more columns]

## Sheet: JEV_Feces
															Normalised abundance										Raw abundance
															Ctrl					JEV					Ctrl					JEV					Tags
	Compound	Neutral mass (Da)	m/z	Charge	Retention time (min)	Chromatographic peak width (min)	Identifications	q Value	Max Fold Change	Highest Mean	Lowest Mean	Isotope Distribution	Maximum Abundance	Minimum CV%	Ctrl-1_neg	Ctrl-2_neg	Ctrl-3_neg	Ctrl-4_neg	Ctrl-5_neg	JEV-1_neg	JEV-2_neg	JEV-3_neg	JEV-4_neg	JEV-5_neg	Ctrl-1_neg	Ctrl-2_neg	Ctrl-3_neg	Ctrl-4_neg	Ctrl-5_neg	JEV-1_neg	JEV-2_neg	JEV-3_neg	JEV-4_neg	JEV-5_neg	JEV vs Ctrl VIP>1	Minimum CV <= 30	JEV vs Ctrl Anova p-value <= 0.05	JEV vs Ctrl	Accepted Compound ID	Accepted Description	Adducts	Formula	Score	Fragmentation Score	Mass Error (ppm)	Isotope Similarity	Compound Link	Anova (p)	VIP
neg	7.44_987.7052m/z		987.705	1	7.43542	0.128483	1	0.758171	2003.6	JEV	Ctrl	100 - 62.2 - 19.8 - 3.45 - 0.231	15624.7	68.16	3.44456	7.9735	16.1004	2.85686	8.61621	26.7357	38611.8	29.731	39437	18.4019	3.72413	6.7549	17.3286	2.86663	7.46246	29.6028	39218.6	33.5961	22243.9	21.0394	x	x	x	x	HMDB0030423	28-Homobrassinolide	2M-H	C29H50O6	38.7	28.3	-9.10673	75.0804	http://nonlinear.com/redirect/outbound?p=hmdb&param=HMDB0030423	0.0481194	2.4944
	3.73_333.0051m/z		333.005	1	3.72572	0.229017	14	0.758171	144.106	JEV	Ctrl	100 - 16.9 - 12.4 - 1.18	33455.3	109.58	170.954	119.446	671.842	182.361	16.1876	1586.66	148.212	916.26	158940	5685.13	184.829	101.191	723.089	182.984	14.02	1756.81	150.541	1035.38	89648.1	6499.97	x	x	x	x	HMDB0125406	(5,7-dihydroxy-4-oxo-2-phenyl-3,4-dihydro-2H-1-benzopyran-3-yl)oxidanesulfonic acid	M-H2O-H	C15H12O8S	41.7	20.3	-6.67295	95.7723	http://nonlinear.com/redirect/outbound?p=hmdb&param=HMDB0125406	0.0465804	3.045
	0.92_163.0574m/z		163.057	1	0.915867	0.114217	83	0.758171	2.6338	JEV	Ctrl	100 - 5.84 - 0.251	8649.21	22.17	2736.29	4505.2	2793.91	3003.74	3380.49	6224.91	6550.62	7184.4	5594.82	17691.3	2958.38	3816.67	3007.03	3014.02	2927.83	6892.47	6653.57	8118.39	3155.68	20226.9	x	x	x	x	HMDB0059803	9-Hydroxyfluorene	M-H2O-H	C13H10O	37.3	6.49	11.1413	91.9682	http://nonlinear.com/redirect/outbound?p=hmdb&param=HMDB0059803	0.00465839	1.64906
	4.58_382.2333n	382.233	381.226	1	4.58175	0.249133	2	0.758171	2.49707	JEV	Ctrl	100 - 25.5 - 12.2 - 2.72	105734	27.53	20367.2	51576.8	34611.2	56330.8	48829.1	86964.1	83432.6	155723	100748	101801	22020.2	43694.3	37251.3	56523.5	42290.7	96290.1	84743.8	175967	56825.4	116392	x	x	x	x	HMDB0240273	Pyrvinium	M-H, 2M-H	C26H28N3+	35.9	2.92	12.9376	90.0628	http://nonlinear.com/redirect/outbound?p=hmdb&param=HMDB0240273	0.00235351	6.50416
	3.62_382.2321n	382.232	381.225	1	3.61845	0.107083	3	0.758171	2.27633	JEV	Ctrl	100 - 23.3	17412.8	31.59	5417.42	8300.33	5766.62	11432.3	7330.85	9565.74	15846.1	19800.8	26560.3	15291.1	5857.11	7031.79	6206.5	11471.4	6349.22	10591.6	16095.1	22374.9	14981	17482.8	x	x	x	x	HMDB0240273	Pyrvinium	M-H, 2M-H	C26H28N3+	36.2	0.0843	9.99574	91.9021	http://nonlinear.com/redirect/outbound?p=hmdb&param=HMDB0240273	0.00568666	2.42046
	5.99_365.2301m/z		365.23	1	5.9874	0.17775	68	0.758171	2.21825	JEV	Ctrl	100 - 23.8 - 19.2	25775.3	22.78	8280.01	13470.7	8888.82	16569.7	10889.1	17718.5	28451.1	27287.8	22414.4	33004.8	8952.03	11411.9	9566.85	16626.4	9431	19618.6	28898.2	30835.2	12642.5	37735.3	x	x	x	x	HMDB0038694	Crispane	M+FA-H	C20H32O3	38.6	16.8	-9.98985	87.2797	http://nonlinear.com/redirect/outbound?p=hmdb&param=HMDB0038694	0.00133729	3.10356
	7.71_349.2357m/z		349.236	1	7.7131	0.1073	50	0.758171	2.09897	JEV	Ctrl	100 - 19.8 - 0.41	4603.26	29.73	1308.43	2324.14	1442.17	4504.37	1386.41	2508.62	5177.55	6264.43	4473.08	4592.59	1414.62	1968.94	1552.18	4519.78	1200.76	2777.65	5258.92	7078.82	2522.98	5250.84	x	x	x	x	CSID223205	MFCD18429450	M+FA-H	C20H32O2	51.5	71.1	-8.89599	96.1455	http://nonlinear.com/redirect/outbound?p=chemspider&param=223205	0.0187828	1.16162
	3.34_255.1177m/z		255.118	1	3.34075	0.100133	21	0.758171	2.06591	JEV	Ctrl	100 - 8.97	3485.58	24.26	1809.91	1588.02	1807.13	2172.42	1058.45	2661.32	2173.31	3505.66	4456.85	4630.76	1956.8	1345.32	1944.98	2179.85	916.723	2946.71	2207.47	3961.4	2513.83	5294.48	x	x	x	x	HMDB0035193	1-(9H-Pyrido[3,4-b]indol-1-yl)-1,4-butanediol	M-H	C15H16N2O2	41.2	30	14.6963	91.4509	http://nonlinear.com/redirect/outbound?p=hmdb&param=HMDB0035193	0.00562355	1.05442
	0.82_90.0280n	90.028	179.052	1	0.8229	0.150283	19	0.758171	2.0037	JEV	Ctrl	100 - 8.26 - 0.782	23369.9	19.63	11056.3	15210.6	12528	9637	9884.9	14907.4	14365.9	28315.1	25855.3	33405.8	11953.7	12886	13483.6	9669.97	8561.27	16506.1	14591.7	31996.1	14583.3	38193.8	x	x	x	x	HMDB0041929	Methoxyacetic acid	M+FA-H, 2M-H	C3H6O3	35.1	13.4	-41.2604	95.4544	http://nonlinear.com/redirect/outbound?p=hmdb&param=HMDB0041929	0.00943113	2.60378
	6.22_363.2148m/z		363.215	1	6.21532	0.2993	76	0.758171	1.9761	JEV	Ctrl	100 - 24 - 21.7 - 3.75	26952.8	24.44	9723.48	15904.4	9246.02	24314.6	9008.37	15804.1	30523.9	29399.7	26566.2	32469.9	10512.7	13473.7	9951.3	24397.8	7802.11	17499	31003.6	33221.7	14984.3	37123.8	x	x	x	x	HMDB0035311	Galanal A	M+FA-H	C20H30O3	47.4	63	-8.98431	83.8307	http://nonlinear.com/redirect/outbound?p=hmdb&param=HMDB0035311	0.0141145	2.81595
	6.18_565.2757m/z		565.276	1	6.17942	0.107283	6	0.758171	1.79142	JEV	Ctrl	100 - 27.8	17920.6	19.52	7656.91	12269.5	8982.69	9337.48	11771.3	10993.3	22416.5	12829.1	31176.2	12187.7	8278.36	10394.3	9667.88	9369.43	10195.1	12172.2	22768.8	14496.9	17584.5	13934.6	x	x	x	x	CSID30790900	(6Z)-4,9,11-Triacetoxy-3a-hydroxy-2,5,8,8,12-pentamethyl-2,3,3a,4,5,8,9,10,11,13a-decahydro-1H-cyclopenta[12]annulen-1-yl benzoate	M-H2O-H	C33H44O9	40.2	23.1	-8.50204	87.2302	http://nonlinear.com/redirect/outbound?p=chemspider&param=30790900	0.0487847	1.90314
	6.84_1031.5165m/z		1031.52	1	6.8432	0.235767	2	0.758171	1.75956	JEV	Ctrl	100 - 63.8 - 49.9	9544.57	22.55	4618.83	5628.2	7317.38	5441.8	4115.84	9844.47	6464.48	5941.08	16864.8	8608.07	4993.7	4768.04	7875.55	5460.42	3564.71	10900.2	6566.07	6713.43	9512.35	9841.84	x	x	x	x	HMDB0038029	Eriojaposide B	2M-H	C25H40O11	31.8	6.84	9.38082	62.3422	http://nonlinear.com/redirect/outbound?p=hmdb&param=HMDB0038029	0.0404474	1.38134
	5.57_365.2226m/z		365.223	1	5.56605	0.08495	5	0.758171	1.74533	JEV	Ctrl	100 - 13.6	3698.26	12.47	1916.58	2318.75	1778.4	2398.76	2182.25	2887.73	2878.64	4304.96	4902.03	3517.92	2072.13	1964.38	1914.06	2406.97	1890.04	3197.41	2923.88	4864.62	2764.92	4022.14	x	x	x	x	HMDB0033523	(-)-Pyrifolidine	M-H2O-H	C23H32N2O3	38.6	8.49	-2.16925	87.1283	http://nonlinear.com/redirect/outbound?p=hmdb&param=HMDB0033523	0.00205938	1.00428
	4.41_334.2105n	334.211	379.21	1	4.41115	0.250067	36	0.758171	1.72932	JEV	Ctrl	100 - 24.9	52101.9	25.45	13316.6	36959.6	19919.5	51686.8	28760.4	51227	38086.8	53177.2	44699.5	73319.2	14397.4	31311.1	21439	51863.6	24909.2	56720.6	38685.4	60090.3	25212.2	83827.9	x	x	x	x	HMDB0041055	Phytocassane B	M-H, M+FA-H	C20H30O4	42.8	31.4	-11.5908	95.1578	http://nonlinear.com/redirect/outbound?p=hmdb&param=HMDB0041055	0.0416837	3.38612
	4.82_984.5015m/z		984.502	1	4.82467	0.12135	14	0.758171	1.71544	JEV	Ctrl	92.9 - 100	4428.38	18.75	2092.04	2368.5	2607.43	3379.23	2460.26	5213.87	3711.84	2736.49	4128.87	6350.85	2261.83	2006.52	2806.33	3390.79	2130.82	5773	3770.18	3092.23	2328.84	7261.1	x	x	x	x	HMDB0116074	CDP-DG(a-13:0/i-18:0)	M+FA-H	C43H79N3O15P2	32.4	2.86	4.98028	64.8896	http://nonlinear.com/redirect/outbound?p=hmdb&param=HMDB0116074	0.014443	1.01694
	11.11_483.2736m/z		483.274	1	11.1054	0.228	5	0.758171	1.67634	JEV	Ctrl	100 - 20.9	29135	24.56	11289	23499.2	14696.4	21569.4	15846.7	27690	21470.3	27347.7	40964.2	28202.9	12205.3	19907.8	15817.5	21643.2	13724.8	30659.5	21807.7	30903	23105.3	32245.2	x	x	x	x	HMDB0007850	LysoPA(0:0/18:0)	M+FA-H	C21H43O7P	43.7	26.3	1.62116	94.3747	http://nonlinear.com/redirect/outbound?p=hmdb&param=HMDB0007850	0.0138559	2.6102
	6.20_373.2558m/z		373.256	1	6.20083	0.114417	9	0.758171	1.65812	JEV	Ctrl	100 - 16.9 - 3.34	5744.68	25.35	2566.58	3212.42	4708.46	3993.74	2841.67	7182.91	4364.75	3857.52	4293.62	9024.61	2774.89	2721.47	5067.62	4007.41	2461.16	7953.2	4433.34	4359.01	2421.76	10318.1	x	x	x	x	HMDB0031044	Avocadene 2-acetate	M+FA-H	C19H36O4	39.7	14.8	-11.5443	96.0134	http://nonlinear.com/redirect/outbound?p=hmdb&param=HMDB0031044	0.0458897	1.04099
	10.01_540.3309m/z		540.331	1	10.0054	0.2425	2	0.758171	1.64237	JEV	Ctrl	100 - 27 - 2.76	48826	28.58	16617.7	23591.4	34176.5	48023.5	26235.5	35037.7	36405.8	50812.5	69221.4	52652.4	17966.4	19985.9	36783.5	48187.8	22722.4	38795.2	36977.9	57418.2	39043.4	60199	x	x	x	x	HMDB0010382	LysoPC(16:0)	M+FA-H	C24H50NO7P	43.7	21.4	0.326526	97.6613	http://nonlinear.com/redirect/outbound?p=hmdb&param=HMDB0010382	0.0423189	3.10535
	6.42_287.2197m/z		287.22	1	6.41518	0.142967	60	0.758171	1.62397	JEV	Ctrl	100 - 15.9 - 0.44	9753.08	27.1	3958.27	6405.58	8442.11	5606.03	5616.47	10179.6	8312.09	8601.47	7494.7	14177.6	4279.54	5426.61	9086.07	5625.21	4864.4	11271.2	8442.71	9719.68	4227.29	16209.6	x	x	x	x	HMDB0072870	MG(0:0/i-13:0/0:0)	M-H	C16H32O4	37	0	-10.7446	96.6198	http://nonlinear.com/redirect/outbound?p=hmdb&param=HMDB0072870	0.0184578	1.43375
	10.01_557.3207m/z		557.321	1	10.0054	0.264167	5	0.758171	1.57444	JEV	Ctrl	100 - 15.4	16508	28.68	6394.81	8647.27	11787.4	16130.5	9465.14	12069.1	12550.5	17525.8	23803.5	16591.2	6913.83	7325.71	12686.5	16185.7	8197.72	13363.4	12747.7	19804.2	13426	18969.1	x	x	x	x	HMDB0013889	E-10-Hydroxynortriptyline	2M-H	C19H21NO	37.8	2.76	6.03515	93.3163	http://nonlinear.com/redirect/outbound?p=hmdb&param=HMDB0013889	0.0448072	1.72596
	9.77_271.2252m/z		271.225	1	9.76903	0.12875	18	0.758171	1.56631	JEV	Ctrl	100 - 16.8 - 1.34	7075.6	12.8	3548.76	4660.92	4493	5036.96	4847.17	7370.49	6179.07	5246.71	7391.06	9190.66	3836.79	3948.59	4835.72	5054.2	4198.11	8160.9	6276.18	5928.79	4168.83	10507.9	x	x	x	x	HMDB0112190	12-Hydroxyhexadecanoic acid	M-H	C16H32O3	53.2	78.4	-9.97866	98.3812	http://nonlinear.com/redirect/outbound?p=hmdb&param=HMDB0112190	0.00461739	1.26503
	2.48_1185.4684m/z		1185.47	1	2.47803	1.49792	1	0.758171	1.54268	JEV	Ctrl	92.3 - 100 - 5.62	25987	4.73	16179.4	16992.2	18024.6	16999.6	16031.5	25508.9	31155	20546.8	21966.4	30758.1	17492.5	14395.3	19399.5	17057.8	13884.8	28244.5	31644.6	23218	12389.8	35166.5	x	x	x	x	HMDB0060139	4-Hydroxy-17beta-estradiol-2-S-glutathione	2M-H	C28H39N3O9S	34.7	18	-4.82563	60.9574	http://nonlinear.com/redirect/outbound?p=hmdb&param=HMDB0060139	0.00134689	2.45058
	2.63_207.0492n	207.049	206.042	1	2.63437	0.199867	8	0.758171	1.53187	JEV	Ctrl	100 - 13.5 - 0.00531	265900	11.3	264163	154662	147345	167758	133968	280783	278889	292060	215696	262075	285603	131025	158584	168332	116029	310894	283272	330028	121660	299637	x	x	x	x	CSID389670	2-Formaminobenzoylacetate	M-H2O-H, M-H, 2M-H	C10H9NO4	39.6	19.9	-18.9351	96.9011	http://nonlinear.com/redirect/outbound?p=chemspider&param=389670	0.00841208	7.53215
	9.90_623.4023m/z		623.402	1	9.89803	0.729217	20	0.758171	1.50043	JEV	Ctrl	100 - 51.5	18176.9	12.76	11113.8	11847.5	14551.2	12496.7	10562.9	17878.3	10833.5	17908.9	26697.9	17565.7	12015.8	10036.9	15661.1	12539.5	9148.51	19795.6	11003.8	20237.1	15058.6	20083.4	x	x	x	x	HMDB0014343	Oseltamivir	2M-H	C16H28N2O4	43.9	42.9	-0.359508	76.8665	http://nonlinear.com/redirect/outbound?p=hmdb&param=HMDB0014343	0.0413835	1.74954
	6.21_553.2841m/z		553.284	1	6.20818	0.30645	5	0.758171	1.47989	JEV	Ctrl	100 - 38.7 - 11.6 - 2.13	158440	8.58	106384	118930	113220	100389	96385.9	99361.2	214783	128652	197871	151530	115019	100754	121856	100732	83479.5	110017	218159	145377	111606	173248	x	x	x	x	HMDB0035987	Ganoderic acid H	M-H2O-H	C32H44O9	42.9	26.3	5.96849	94.8179	http://nonlinear.com/redirect/outbound?p=hmdb&param=HMDB0035987	0.0406479	5.11834
	10.42_298.2484n	298.248	297.241	1	10.42	0.272017	14	0.758171	1.47119	JEV	Ctrl	100 - 20.4 - 0.345 - 0.0126	177452	16.38	104795	126688	95181.6	131370	145057	172422	193087	128654	196793	196303	113301	107326	102442	131819	125633	190912	196122	145379	110998	224439	x	x	x	x	CSID4472198	18-hydroxyoleic acid	M-H, M+FA-H	C18H34O3	43.3	28	-8.13944	97.7116	http://nonlinear.com/redirect/outbound?p=chemspider&param=4472198	0.00876166	5.96031
	11.89_467.2871m/z		467.287	1	11.8907	0.792667	1	0.758171	1.44718	JEV	Ctrl	100 - 24.1	17958.1	19.04	9188.58	12886	14015.5	15040.3	10914.8	17818.5	14184.5	14105.8	25058.1	18623.5	9934.34	10916.6	15084.6	15091.8	9453.29	19729.3	14407.5	15939.6	14133.7	21292.8	x	x	x	x	CSID388755	benzoylagmatine	2M-H	C12H18N4O	37.4	0	-3.74148	91.5136	http://nonlinear.com/redirect/outbound?p=chemspider&param=388755	0.0307883	1.70156
	2.63_163.0594n	163.059	162.052	1	2.63437	0.241983	7	0.758171	1.42387	JEV	Ctrl	100 - 11.1	124330	13.77	128116	82584.7	74095.4	80405.8	71388	139979	124124	136292	96324	124929	138515	69963.2	79747.3	80681	61828.8	154990	126075	154011	54330.3	142834	x	x	x	x	HMDB0004186	3-Methyldioxyindole	M-H, M+FA-H	C9H9NO2	42	34.6	-24.3568	98.469	http://nonlinear.com/redirect/outbound?p=hmdb&param=HMDB0004186	0.0178547	4.57977
	6.39_565.2819m/z		565.282	1	6.38663	0.12135	3	0.758171	1.41185	JEV	Ctrl	100 - 36	25502.2	9.64	18243.2	20647	16536.3	18523.3	16365.3	23736.8	25269.1	23537.4	31364.9	23602.9	19723.9	17491.5	17797.7	18586.6	14173.9	26282.4	25666.3	26597.3	17690.9	26985.9	x	x	x	x	CSID30790900	(6Z)-4,9,11-Triacetoxy-3a-hydroxy-2,5,8,8,12-pentamethyl-2,3,3a,4,5,8,9,10,11,13a-decahydro-1H-cyclopenta[12]annulen-1-yl benzoate	M-H2O-H	C33H44O9	41.3	16	2.07414	92.8079	http://nonlinear.com/redirect/outbound?p=chemspider&param=30790900	0.00114843	2.23226
	7.55_563.2703m/z		563.27	1	7.54962	0.15635	5	0.758171	1.40066	JEV	Ctrl	100 - 24.5	8524.71	22.79	4875.64	7524.62	4600.63	5953.02	7477.11	7045.91	8410.69	8423.16	11810.6	6933.21	5271.35	6374.63	4951.56	5973.39	6475.9	7801.52	8542.87	9518.19	6661.59	7926.93	x	x	x	x	HMDB0031935	Blumenol C O-[rhamnosyl-(1->6)-glucoside]	M+FA-H	C25H42O11	38.6	2.12	-1.1329	92.1807	http://nonlinear.com/redirect/outbound?p=hmdb&param=HMDB0031935	0.0428445	1.10128
	10.42_365.2292m/z		365.229	1	10.42	0.214633	68	0.758171	1.34545	JEV	Ctrl	100 - 26.6 - 8.1	7906.57	11.47	5262.05	6042.68	5107.28	6284.69	6685.83	7358.33	8334.15	6186.34	9118.25	8535.78	5689.13	5119.17	5496.86	6306.19	5790.57	8147.43	8465.12	6990.58	5143.03	9759.19	x	x	x	x	HMDB0014453	Ibutilide	M-H2O-H	C20H36N2O3S	37.9	0	6.06465	96.5078	http://nonlinear.com/redirect/outbound?p=hmdb&param=HMDB0014453	0.00921417	1.11481
	8.54_424.2458m/z		424.246	1	8.54142	0.199667	9	0.758171	1.339	JEV	Ctrl	100 - 22.4	16712.4	14.58	8976.08	13211.7	10130.6	15489.4	14598.7	16296.2	19817.7	13996.2	18537	14915	9704.59	11192.6	10903.3	15542.4	12643.9	18043.8	20129.2	15815.7	10455.5	17052.7	x	x	x	x	HMDB0000277	Sphingosine 1-phosphate	M+FA-H	C18H38NO5P	41.7	16.2	-3.13288	95.8295	http://nonlinear.com/redirect/outbound?p=hmdb&param=HMDB0000277	0.0395274	1.49981
	6.26_276.0975n	276.097	551.272	1	6.25815	0.8415	38	0.758171	1.32961	JEV	Ctrl	100 - 36.1	437386	7.5	246127	399753	321158	251811	425937	423675	477170	449369	389519	447197	266104	338658	345655	252672	368902	469110	484669	507788	219703	511293	x	x	x	x	HMDB0136553	7,8-dihydroxy-6-methoxy-3-(2-methylbut-3-en-2-yl)-2H-chromen-2-one	M-H, 2M-H	C15H16O5	35.9	4.96	-8.38092	84.0916	http://nonlinear.com/redirect/outbound?p=hmdb&param=HMDB0136553	0.0315735	7.74186
	5.81_833.4593m/z		833.459	1	5.80875	0.4706	7	0.758171	1.30032	JEV	Ctrl	100 - 49.9	17054.4	9.53	11874.7	12107.4	13832.8	14882.1	12880.6	16910.1	18560.4	19240.7	11733.4	18827.5	12838.4	10257	14888	14933	11155.8	18723.6	18852.1	21742.1	6618.05	21526	x	x	x	x	HMDB0116524	PGP(a-13:0/i-18:0)	M+FA-H	C37H74O13P2	37.5	2.12	0.746221	86.4694	http://nonlinear.com/redirect/outbound?p=hmdb&param=HMDB0116524	0.038638	1.46178
	4.41_677.2829m/z		677.283	1	4.41115	0.392133	14	0.758171	1.29739	JEV	Ctrl	100 - 77.1	13687.6	5.09	9815.64	10914.2	11095.9	10171.8	10752.7	12963	11998.8	11436.8	18868.7	13170.6	10612.3	9246.21	11942.3	10206.6	9312.88	14353.1	12187.4	12923.7	10642.6	15058.4	x	x	x	x	HMDB0039005	Hv-NCC-1	M-H	C35H42N4O10	35.1	1.6	0.119757	74.1307	http://nonlinear.com/redirect/outbound?p=hmdb&param=HMDB0039005	0.0277461	1.25804
	8.49_509.2610m/z		509.261	1	8.4912	0.170867	7	0.758171	1.27203	JEV	Ctrl	100 - 12.8	11308	6.71	8812.57	9865.98	8410.58	8948.94	8410.48	9159.89	11193.3	14030.9	12132.4	10023.5	9527.81	8358.16	9052.13	8979.56	7284.28	10142.2	11369.3	15854.9	6843.13	11460.2	x	x	x	x	CSID170768	nebramycin 5'	M-H	C19H38N6O10	39.9	19.3	6.54697	87.5041	http://nonlinear.com/redirect/outbound?p=chemspider&param=170768	0.0198215	1.15544
	5.69_1039.4461m/z		1039.45	1	5.69455	2.70377	7	0.758171	1.26638	JEV	Ctrl	100 - 89.7	58325.3	2.96	43898.8	45635.1	46948.5	46472.2	47329.8	54413.3	58646.6	56378.8	48831.8	73356.3	47461.8	38660.7	50529.7	46631.2	40992.1	60248.6	59568.2	63708.2	27542.9	83870.3	x	x	x	x	HMDB0030142	Physalolactone C	2M-H	C28H37ClO7	34.3	25.7	7.46563	54.3835	http://nonlinear.com/redirect/outbound?p=hmdb&param=HMDB0030142	0.0104213	2.65838
	9.33_883.5103m/z		883.51	1	9.33403	0.1715	1	0.758171	1.2592	JEV	Ctrl	100 - 47.5	9928.68	11.11	6508.13	7790.77	9394.88	8365.43	7365.27	11510.1	10640.6	8978.11	9097.34	9417.21	7036.34	6600.1	10111.5	8394.05	6379.03	12744.5	10807.8	10145.3	5131.23	10767	x	x	x	x	HMDB0062591	Prostaglandin G2 2-glyceryl Ester	2M-H	C23H38O8	41.5	31.1	4.77719	82.1318	http://nonlinear.com/redirect/outbound?p=hmdb&param=HMDB0062591	0.0176384	1.08449
	3.40_1031.4030m/z		1031.4	1	3.39787	3.08175	1	0.758171	1.25273	JEV	Ctrl	100 - 92.6 - 95.9	101719	2.72	77674	82632.2	83241.2	80560.6	81881.3	103649	85602.2	90185	104999	124160	83978.2	70003.5	89590.8	80836.2	70917	114765	86947.4	101909	59223.4	141956	x	x	x	x	HMDB0010147	PIP3(16:0/16:0)	M-H2O-H	C41H82O22P4	30.9	3.95	-3.83429	54.9629	http://nonlinear.com/redirect/outbound?p=hmdb&param=HMDB0010147	0.0113245	3.45038
	1.01_451.1147m/z		451.115	1	1.00867	0.49205	34	0.758171	1.22342	JEV	Ctrl	100 - 70.9	13143.8	8.05	10127.6	11929.1	9889.25	10417.8	11353.8	12021.3	16631.6	12279	13617.4	11169.8	10949.5	10106	10643.6	10453.5	9833.49	13310.5	16892.9	13875.3	7680.72	12770.7	x	x	x	x	CSID56577	N-Nitrosofolic acid	M-H2O-H	C19H18N8O7	38.7	29.6	5.68632	70.5707	http://nonlinear.com/redirect/outbound?p=chemspider&param=56577	0.0367443	1.10187
	4.74_1031.4589m/z		1031.46	1	4.7388	0.58505	2	0.758171	1.22242	JEV	Ctrl	90.9 - 82.2 - 100 - 4.61 - 5.07	16023.4	1.4	13028.2	13050.1	12892.5	13375.5	13193.2	15684.7	17861.4	16080.7	11854.6	18635.3	14085.6	11055.7	13875.9	13421.3	11426.6	17366.8	18142.1	18171.2	6686.44	21306.3	x	x	x	x	HMDB0060863	Perindoprilat glucuronide	2M-H	C23H36N2O11	32	20	2.26793	42.486	http://nonlinear.com/redirect/outbound?p=hmdb&param=HMDB0060863	0.0444165	1.23589
	2.27_1069.3978m/z		1069.4	1	2.27083	1.73278	4	0.758171	1.21606	JEV	Ctrl	100 - 96.5	32885.5	5.89	25547.1	29653.7	26959.4	26006.3	27046.7	34551.5	27529.9	28250.6	39338.3	34757.3	27620.6	25121.7	29015.8	26095.3	23425	38256.8	27962.5	31923.2	22188.2	39739	x	x	x	x	HMDB0135511	6-[4-(2-{[3-(3,4-dimethoxyphenyl)-1-hydroxypropylidene]amino}ethyl)-2-methoxyphenoxy]-3,4,5-trihydroxyoxane-2-carboxylic acid	2M-H	C26H33NO11	33.7	11.2	-5.30947	63.3388	http://nonlinear.com/redirect/outbound?p=hmdb&param=HMDB0135511	0.032086	1.75761
	2.55_777.2968m/z		777.297	1	2.5487	1.48323	4	0.758171	1.21337	JEV	Ctrl	100 - 94.3	60299.9	3.29	46920.4	50499.8	50936.7	49553.7	50570.6	60067.8	53982.2	52991.4	59877.1	74581.3	50728.6	42781.9	54822.2	49723.3	43799	66509.4	54830.5	59880.3	33772.9	85270.9	x	x	x	x	HMDB0015286	Gemifloxacin	2M-H	C18H20FN5O4	35.9	24.1	5.38514	61.5446	http://nonlinear.com/redirect/outbound?p=hmdb&param=HMDB0015286	0.0177505	2.41478
	1.71_586.1752m/z		586.175	1	1.71433	0.556483	1	0.758171	1.21196	JEV	Ctrl	100 - 80 - 51.2	26570.1	7.14	22136.2	23870	20602.9	20111.6	22895	23567.1	24664.3	23180.4	34032.7	27405.9	23932.9	20221.9	22174.5	20180.4	19829.2	26094.5	25051.9	26193.9	19195.7	31334	x	x	x	x	CSID5036865	Domperidone Maleate	M+FA-H	C26H28ClN5O6	32.1	0	7.79184	68.9688	http://nonlinear.com/redirect/outbound?p=chemspider&param=5036865	0.0455295	1.50432
	0.81_523.1383m/z		523.138	1	0.808617	0.214533	4	0.758171	1.20903	JEV	Ctrl	100 - 47.9	18498	9.6	11977.2	18564.8	14778.8	15891.1	15287.7	17991.8	19926.4	15814.2	18498.4	20259.3	12949.2	15727.5	15906.1	15945.4	13240.6	19921.3	20239.6	17870.1	10433.8	23163	x	x	x	x	HMDB0031762	Carbadox	2M-H	C11H10N4O4	34	5.13	9.95152	75.903	http://nonlinear.com/redirect/outbound?p=hmdb&param=HMDB0031762	0.0465434	1.2867
	5.47_565.2796m/z		565.28	1	5.46662	0.135833	4	0.758171	1.19458	JEV	Ctrl	100 - 37.9	17681.5	10.86	14427.5	15255.7	14621.7	12108.2	17594.4	16230.2	18910.4	20357.1	15757.2	17152.8	15598.4	12924.2	15737	12149.6	15238.4	17970.8	19207.6	23003.6	8887.61	19611.3	x	x	x	x	CSID30790900	(6Z)-4,9,11-Triacetoxy-3a-hydroxy-2,5,8,8,12-pentamethyl-2,3,3a,4,5,8,9,10,11,13a-decahydro-1H-cyclopenta[12]annulen-1-yl benzoate	M-H2O-H	C33H44O9	42.2	21	-1.80417	92.3608	http://nonlinear.com/redirect/outbound?p=chemspider&param=30790900	0.0465137	1.20967
	2.81_808.3150m/z		808.315	1	2.80568	2.3254	1	0.758171	1.1868	JEV	Ctrl	100 - 99.6	81244	2.65	65359.9	68949	70026	69397.1	68550.9	81013	70915.4	75025.9	79090.4	100175	70664.6	58411.5	75367.5	69634.5	59371.6	89700.8	72029.9	84779.4	44609.9	114533	x	x	x	x	CSID29368490	aclacinomycin Y	M-H	C42H51NO15	43.2	53.4	-4.47212	67.7073	http://nonlinear.com/redirect/outbound?p=chemspider&param=29368490	0.0255187	2.59788
	2.97_700.2801m/z		700.28	1	2.97007	0.734033	1	0.758171	1.17632	JEV	Ctrl	77.9 - 100 - 21.5 - 28.4	47829.6	2.82	39958.5	41316.7	40366	39381.7	42278.3	47357.8	41805.5	45883.8	45673.3	58427.6	43201.6	35002.3	43445.1	39516.5	36617.1	52436.4	42462.5	51848.8	25761.4	66801.9	x	x	x	x	CSID8028321	CP 424391-18	M+FA-H	C32H41N5O10	28.8	0	-5.20013	50.1961	http://nonlinear.com/redirect/outbound?p=chemspider&param=8028321	0.0254494	1.9476
	3.75_683.2603m/z		683.26	1	3.75448	1.54095	9	0.758171	1.1613	JEV	Ctrl	100 - 83.9	67375.5	3.02	55669.8	59220	60002.5	56874.9	58319.4	66658.6	60541.4	60612.4	65127.7	83937.2	60188.1	50169.4	64579.5	57069.5	50510.2	73807.1	61492.9	68492.2	36734.4	95967.7	x	x	x	x	HMDB0013682	Coniferin	2M-H	C16H22O8	31	0	6.80794	62.8849	http://nonlinear.com/redirect/outbound?p=hmdb&param=HMDB0013682	0.049225	2.11845
	4.22_725.2683m/z		725.268	1	4.21818	2.4396	3	0.758171	1.13974	JEV	Ctrl	100 - 90.7	91839.4	3.88	75712.4	82343.4	82948.4	79146.6	82746.4	94058.4	82745.6	84781.5	90009.2	107602	81857.3	69758.8	89275.7	79417.4	71666.3	104145	84046	95803.3	50768.5	123025	x	x	x	x	CSID139688	Antazoline Phosphate	2M-H	C17H22N3O4P	30.6	0	8.20181	61.9072	http://nonlinear.com/redirect/outbound?p=chemspider&param=139688	0.0339612	2.41795
	3.10_681.2670m/z		681.267	1	3.09785	0.5984	14	0.758171	1.12522	JEV	Ctrl	100 - 82.7	27367.5	4.04	23222.5	24911.7	24571.5	23400.7	25503.4	27636.9	25728.7	25812.4	25287.8	32371.7	25107.2	21104.5	26445.8	23480.8	22088.4	30600.6	26133	29168	14263.2	37011.4	x	x	x	x	HMDB0011668	6-(alpha-D-Glucosaminyl)-1D-myo-inositol	2M-H	C12H23NO10	34	23.7	14.5161	61.2969	http://nonlinear.com/redirect/outbound?p=hmdb&param=HMDB0011668	0.0483371	1.21977
	2.94_665.2566m/z		665.257	1	2.94152	0.7485	88	0.758171	1.1037	JEV	Ctrl	100 - 81.2	35023.4	4.84	30618.7	33125	31037.2	30254.8	33628.4	35285	32936.1	32938.9	35656.7	38300.4	33103.8	28062.5	33404.7	30358.3	29125.4	39068.9	33453.7	37221	20111.7	43789.9	x	x	x	x	HMDB0129700	3,4,5-trihydroxy-6-[3-hydroxy-4-(7-hydroxy-3-{[3-methyl-3-(4-methylpent-3-en-1-yl)oxiran-2-yl]methyl}-8-(3-methylbut-2-en-1-yl)-4-oxo-4H-chromen-2-yl)phenoxy]oxane-2-carboxylic acid	M-H	C36H42O12	34.4	6.21	-5.57445	72.2259	http://nonlinear.com/redirect/outbound?p=hmdb&param=HMDB0129700	0.0245555	1.34715
	4.23_625.2664m/z		625.266	1	4.23245	0.7207	1	0.758171	1.0971	JEV	Ctrl	100 - 87.3	22627.2	4.54	19488.4	21166.9	19802.7	20119	22545.7	21610.9	23802	21783.8	22310.8	23628.4	21070.1	17932	21313.3	20187.9	19526.7	23928.4	24176.1	24615.8	12584.1	27015	x	x	x	x	CSID30791519	3-{(2Z,3S,4S)-5-[(2Z,5R)-2-[(3-Ethyl-5-formyl-4-methyl-1H-pyrrol-2-yl)methylene]-5-(methoxycarbonyl)-3-methyl-4-oxo-1,2,4,5-tetrahydrocyclopenta[b]pyrrol-6-yl]-3-methyl-2-[(3-methyl-5-oxo-4-vinyl-2,5-dihydro-1H-pyrrol-2-yl)methylene]-3,4-dihydro-2H-pyrrol-4-yl}propanoic acid	M-H	C35H38N4O7	35.5	7.45	-0.576232	70.6024	http://nonlinear.com/redirect/outbound?p=chemspider&param=30791519	0.0233525	1.05652
	3.01_314.1051m/z		314.105	1	3.00577	0.413533	13	0.758171	1.11291	Ctrl	JEV	100 - 45.7 - 9.29	40134.7	6.66	44094.4	40574.4	40714.1	37715	37575.7	35483.5	32624.9	36099	35518.3	40588.6	47673.2	34373.4	43819.7	37844.1	32544.1	39288.8	33137.7	40792	20033.6	46406.1	x	x	x	x	CSID29635	Pirimiphos-ethyl	M-H2O-H	C13H24N3O3PS	35.9	15.4	-14.0239	78.7011	http://nonlinear.com/redirect/outbound?p=chemspider&param=29635	0.046353	1.43413
	1.02_350.1036m/z		350.104	1	1.02293	0.349433	12	0.758171	1.14446	Ctrl	JEV	44.4 - 100 - 41.2	27425.6	7.19	25962.4	30865	28240.5	23797.6	28262.7	23067.5	23722.8	25764.2	25573.7	21690.4	28069.5	26147.9	30394.7	23879	24478.2	25541.3	24095.7	29113.6	14424.5	24799.2	x	x	x	x	HMDB0029401	Ochratoxin B	M-H2O-H	C20H19NO6	29.8	20.5	0.577195	29.1625	http://nonlinear.com/redirect/outbound?p=hmdb&param=HMDB0029401	0.0407589	1.34136
	6.37_637.2889m/z		637.289	1	6.36522	0.27075	4	0.758171	1.16068	Ctrl	JEV	100 - 66.2 - 20.9	18216.8	4.81	17960.2	19346.3	17689.3	17208.7	18879.3	16188.4	17271.8	16951.4	14483.6	13579.5	19417.9	16389.6	19038.7	17267.6	16351.3	17924.4	17543.3	19155.1	8169.27	15525.8	x	x	x	x	HMDB0034433	Riboflavine 2',3',4',5'-tetrabutanoate	M-H2O-H	C33H44N4O10	35.2	0	1.44678	77.8317	http://nonlinear.com/redirect/outbound?p=hmdb&param=HMDB0034433	0.017823	1.21697
	2.04_239.0557m/z		239.056	1	2.0422	0.32095	48	0.758171	1.22347	Ctrl	JEV	100 - 26.2	11108.5	9.77	10923.9	12338.2	9545.08	10827.4	11907.9	9264.89	10229.5	9627.04	8715.93	7559.99	11810.5	10452.5	10273.2	10864.5	10313.4	10258.5	10390.3	10878.6	4916.11	8643.54	x	x	x	x	HMDB0132101	2-benzyl-2,3-dihydroxybutanedioic acid	M-H	C11H12O6	38.3	6.08	-1.73823	87.5005	http://nonlinear.com/redirect/outbound?p=hmdb&param=HMDB0132101	0.0176332	1.08903
	4.19_187.0938m/z		187.094	1	4.18962	0.149917	54	0.758171	1.2353	Ctrl	JEV	100 - 10 - 0.916	24633.7	10.22	26790.8	20788.9	26444.9	23421.3	25722.4	24323.9	16156.6	19842.4	16731.4	22653.1	28965.2	17611.7	28462.1	23501.4	22278.1	26932.4	16410.5	22421.9	9437.12	25899.9	x	x	x	x	CSID1664	4-Aminopyridine	2M-H	C5H6N2	38.7	22.5	-27.1953	95.8613	http://nonlinear.com/redirect/outbound?p=chemspider&param=1664	0.0467437	1.55438
	0.87_202.0253m/z		202.025	1	0.873033	0.121517	2	0.758171	1.27861	Ctrl	JEV	100 - 9.9 - 6.35 - 2.05	87842.8	8.73	87671	105180	70915.6	80260.4	95187.2	70864.6	65605.2	75543.7	71461.1	60035.1	94786.6	89105.2	76325	80535	82441.3	78464.2	66636.2	85364.5	40306.7	68639.8	x	x	x	x	CSID21954	AMPYZINE SULFATE	M-H2O-H	C6H11N3O4S	35.8	0	-17.6993	97.0184	http://nonlinear.com/redirect/outbound?p=chemspider&param=21954	0.0160205	3.31659
	3.62_385.1022m/z		385.102	1	3.61845	0.0713833	16	0.758171	1.28738	Ctrl	JEV	100 - 22.1	8610.32	6.7	8768.35	7792.27	8828.78	8335.28	9326.93	6619.07	7786.06	6737.48	7545.11	4753.56	9480.01	6601.38	9502.24	8363.8	8078.02	7328.9	7908.42	7613.37	4255.72	5434.87	x	x	x	x	HMDB0001030	3'-Ketolactose	M+FA-H	C12H20O11	45.9	50.1	10.0651	90.5062	http://nonlinear.com/redirect/outbound?p=hmdb&param=HMDB0001030	0.0210847	1.07403
	7.31_351.1850m/z		351.185	1	7.30672	0.15725	16	0.758171	1.28891	Ctrl	JEV	100 - 18.8	7529.15	8.63	8115.81	7422.01	6942.19	8366.2	6799.53	5707.67	6143.41	6138.25	5013	6205.07	8774.5	6287.7	7471.74	8394.83	5889.05	6319.76	6239.95	6936.24	2827.51	7094.43	x	x	x	x	HMDB0014909	Clidinium	M-H	C22H26NO3+	37.8	0	2.7811	92.5266	http://nonlinear.com/redirect/outbound?p=hmdb&param=HMDB0014909	0.00228386	1.06302
	0.79_212.0494n	212.049	423.112	1	0.794333	0.250217	3	0.758171	1.29029	Ctrl	JEV	100 - 28.7	20367.1	16.15	25301.1	20810.3	19972.1	15912.4	19839.5	13838	16000.3	19214.6	17049.6	12821.7	27354.6	17629.8	21495.5	15966.8	17182.9	15322	16251.8	21712.6	9616.57	14659.4	x	x	x	x	HMDB0032997	2-Hydroxyxanthone	M-H2O-H, 2M-H	C13H8O3	36.2	4.2	9.8663	87.645	http://nonlinear.com/redirect/outbound?p=hmdb&param=HMDB0032997	0.0392053	1.54294
	1.56_251.0745m/z		251.075	1	1.56425	0.192017	52	0.758171	1.29788	Ctrl	JEV	100 - 19.1 - 13.6 - 14.2	13857.8	12.53	15720.5	13481.1	15396.2	11475	13216.3	12659.9	7400.53	10588.4	13084.8	9652.72	16996.4	11420.8	16570.6	11514.3	11446.5	14017.5	7516.83	11965	7380.3	11036.2	x	x	x	x	CSID58569	Deoxyinosine	M-H	C10H12N4O4	42.4	50.7	-16.0593	77.8103	http://nonlinear.com/redirect/outbound?p=chemspider&param=58569	0.0482418	1.2883
	9.08_447.3105m/z		447.311	1	9.08377	0.35695	7	0.758171	1.30944	Ctrl	JEV	100 - 30.7	13640.4	14.65	14529.6	13080.6	10416.1	16106.9	14068.8	10752.8	8828.85	12667	9170.35	10665.7	15708.9	11081.5	11210.6	16162	12184.9	11906	8967.6	14313.7	5172.41	12194.4	x	x	x	x	HMDB0032783	Porrigenin A	M-H	C27H44O5	49.9	57.3	-2.346	94.9819	http://nonlinear.com/redirect/outbound?p=hmdb&param=HMDB0032783	0.0250652	1.3401
	1.04_245.0108m/z		245.011	1	1.03652	0.1135	26	0.758171	1.31028	Ctrl	JEV	100 - 7.45	8716.49	10.27	8882.92	9477.02	9134.23	7173.04	8915.24	6793.97	7515.05	7186.56	6984.9	4781.5	9603.88	8028.65	9830.99	7197.58	7721.45	7522.56	7633.15	8120.83	3939.74	5466.82	x	x	x	x	HMDB0130016	2-[4-(sulfooxy)phenyl]propanoic acid	M-H	C9H10O6S	37.4	3.8	-6.89346	91.1527	http://nonlinear.com/redirect/outbound?p=hmdb&param=HMDB0130016	0.0189927	1.1165
	3.63_341.1060m/z		341.106	1	3.63272	0.192233	107	0.758171	1.31956	Ctrl	JEV	100 - 25 - 24.8 - 7.64	12700	15	15005.9	11481.6	14531.2	11010.1	11471.2	9929.07	10357.6	11571.1	7966.66	8297.81	16223.8	9726.87	15639.6	11047.8	9935.17	10993.9	10520.4	13075.4	4493.49	9487.12	x	x	x	x	HMDB0040910	Heteroflavanone A	M-H2O-H	C19H20O7	40.7	33.2	8.14316	79.393	http://nonlinear.com/redirect/outbound?p=hmdb&param=HMDB0040910	0.0198816	1.31729
	9.27_308.1963n	308.196	307.189	1	9.2696	0.2003	10	0.758171	1.32479	Ctrl	JEV	100 - 20.4 - 0.702	154450	9.71	175611	140378	164657	145453	146150	128534	83971.9	122440	101745	146229	189864	118924	177217	145951	126580	142318	85291.5	138358	57387.8	167188	x	x	x	x	HMDB0062357	(6E,8E,10R,12Z)-10-Hydroxy-3-oxooctadecatrienoic acid	M-H2O-H, M-H	C18H28O4	43.3	27.4	-7.83711	97.7521	http://nonlinear.com/redirect/outbound?p=hmdb&param=HMDB0062357	0.0233956	4.67455
	7.02_463.3028m/z		463.303	1	7.02188	0.156567	18	0.758171	1.3524	Ctrl	JEV	100 - 28.7	7053.29	6.96	7202.18	7275.15	4916.17	8144.67	7728.28	5200.06	5409.95	5701.8	4759.48	5005.64	7786.73	6163.29	5291.18	8172.54	6693.43	5757.72	5494.97	6443.05	2684.52	5723.09	x	x	x	x	HMDB0039317	Hexadecyl ferulate	M+FA-H	C26H42O4	39.1	9.33	-8.93312	95.9224	http://nonlinear.com/redirect/outbound?p=hmdb&param=HMDB0039317	0.0156909	1.04343
	8.45_450.3307n	450.331	449.323	1	8.44837	0.206567	5	0.758171	1.3678	Ctrl	JEV	100 - 33 - 1.16	34119	16.9	39308.8	34279.6	25402.9	32308.5	39295.5	25341.6	31283.2	27677.1	16253.3	24167.2	42499.1	29040.7	27340.6	32419	34033.6	28059.2	31774.9	31275.2	9167.44	27631.1	x	x	x	x	HMDB0000601	Coprocholic acid	M-H, M+FA-H	C27H46O5	45.8	44.2	-8.57075	94.2807	http://nonlinear.com/redirect/outbound?p=hmdb&param=HMDB0000601	0.0453971	2.21397
	3.37_241.1047m/z		241.105	1	3.36932	0.207	20	0.758171	1.36916	Ctrl	JEV	100 - 15.5	45766.6	8.23	39946.3	46181.7	49398.3	44653.9	48652.7	33694.5	33841.6	36780.8	19405.3	43411.8	43188.4	39123.7	53166.3	44806.7	42137.9	37307.9	34373.4	41562.3	10945.3	49633.9	x	x	x	x	HMDB0014737	Thiopental	M-H	C11H18N2O2S	41.8	29.3	12.7775	93.1917	http://nonlinear.com/redirect/outbound?p=hmdb&param=HMDB0014737	0.0400769	2.64992
	0.78_589.1654m/z		589.165	1	0.780067	0.3994	4	0.758171	1.38113	Ctrl	JEV	100 - 43.5	33846.7	18.21	36302.6	32134.6	40429	36215	24152.3	19768.3	24603.2	24917.6	33490.2	19752.8	39249	27223.4	43512.9	36338.9	20918.2	21888.3	24989.9	28156.9	18889.7	22583.9	x	x	x	x	HMDB0038583	Piperolactam D	2M-H	C17H13NO4	34.8	0	6.28815	81.3878	http://nonlinear.com/redirect/outbound?p=hmdb&param=HMDB0038583	0.0372871	2.22081
	2.34_519.1443m/z		519.144	1	2.33507	0.164183	4	0.758171	1.39519	Ctrl	JEV	100 - 30.5 - 12.1 - 2.58	52952.1	19.78	41782.2	48661.4	46591.5	60954.3	66771.1	51225.8	38024.9	38423.4	31110	30982.9	45173.3	41224.4	50145.5	61162.9	57830.2	56719.2	38622.4	43418.5	17547.2	35423.6	x	x	x	x	CSID8030195	Fluticasone furoate	M-H2O-H	C27H29F3O6S	39.9	4.76	-2.91201	98.0967	http://nonlinear.com/redirect/outbound?p=chemspider&param=8030195	0.0294976	2.8175
	6.21_302.2059n	302.206	301.199	1	6.20818	0.142983	6	0.758171	1.41181	Ctrl	JEV	100 - 17.9 - 0.832	18179.7	12.37	18974.2	14510.4	18567.9	18219.6	20626.7	11928.2	8559.91	16585.7	16255.4	11055.3	20514.2	12292.7	19984.2	18281.9	17864.7	13207.3	8694.43	18741.9	9168.66	12639.8	x	x	x	x	HMDB0037830	xi-7-Hydroxyhexadecanedioic acid	M-H2O-H, M-H	C16H30O5	41.8	23	-11.4289	98.315	http://nonlinear.com/redirect/outbound?p=hmdb&param=HMDB0037830	0.0279731	1.73422
	8.35_450.3309n	450.331	449.324	1	8.34842	0.434983	5	0.758171	1.4784	Ctrl	JEV	100 - 27.7 - 1.63	69268.7	23.68	92324.5	57241.6	55364.8	60652.9	80759.6	42610.8	52190.2	66811.4	40423.8	32233.2	99817.8	48493.4	59588	60860.4	69945.5	47180.4	53010.4	75497	22800.5	36853.1	x	x	x	x	HMDB0000601	Coprocholic acid	M-H, M+FA-H	C27H46O5	42.5	26.5	-8.11197	95.1217	http://nonlinear.com/redirect/outbound?p=hmdb&param=HMDB0000601	0.0367439	3.38934
	4.70_397.1071m/z		397.107	1	4.7031	0.0713833	21	0.758171	1.50002	Ctrl	JEV	100 - 32.7 - 5.37	7239.31	18.8	8607.54	8388.56	5391.45	7443.3	6365.68	6368.22	3933.37	6224.98	4788.14	2815.94	9306.15	7106.53	5802.71	7468.77	5513.29	7051.15	3995.19	7034.24	2700.69	3219.54	x	x	x	x	HMDB0060617	Penicilloic acid	M+FA-H	C16H20N2O5S	40.9	17.3	-1.00924	88.2181	http://nonlinear.com/redirect/outbound?p=hmdb&param=HMDB0060617	0.038765	1.14616
	4.79_583.1864m/z		583.186	1	4.78897	0.107283	21	0.758171	1.52912	Ctrl	JEV	100 - 48.9	6164.07	18.81	6371.66	5120.35	7304.71	4808.71	7214.92	5132.47	3936.11	4827.05	3888.1	2371.9	6888.8	4337.81	7861.91	4825.17	6248.81	5682.87	3997.97	5454.58	2193.03	2711.86	x	x	x	x	HMDB0015067	Tipranavir	M-H2O-H	C31H33F3N2O5S	36.5	3.51	-3.27806	82.8641	http://nonlinear.com/redirect/outbound?p=hmdb&param=HMDB0015067	0.0247829	1.113
	6.47_229.1408m/z		229.141	1	6.46515	0.15725	44	0.758171	1.56853	Ctrl	JEV	100 - 12.6 - 1.42	15674.4	19.56	18751.6	17927	10887.7	15350.1	15455.4	15222.8	5295.4	9293.84	11348	8805.13	20273.6	15187.2	11718.2	15402.6	13385.9	16855.3	5378.62	10502.1	6400.67	10067.2	x	x	x	x	HMDB0030143	Talaromycin A	M-H	C12H22O4	43.7	36	-16.3252	99.0234	http://nonlinear.com/redirect/outbound?p=hmdb&param=HMDB0030143	0.0383264	1.76163
	0.81_256.0558m/z		256.056	1	0.808617	0.157417	6	0.758171	1.58058	Ctrl	JEV	100 - 12.3	25999.3	23.41	25243.3	20410.4	35304.8	28079.8	20958.4	18264.5	11308.9	20323.2	13024.4	19325.4	27292.1	17291.1	37997.8	28175.9	18152	20223.2	11486.6	22965.3	7346.25	22095.3	x	x	x	x	CSID82842	dimethenamid	M-H2O-H	C12H18ClNO2S	37	19.2	-3.94104	70.238	http://nonlinear.com/redirect/outbound?p=chemspider&param=82842	0.0170502	2.33847
	0.81_258.0540m/z		258.054	1	0.808617	0.178833	10	0.758171	1.63028	Ctrl	JEV	100 - 88.8 - 13.7	21867.4	19.45	16835.2	27286.4	30864.6	19293.7	15057	12917.3	9155.98	15939.9	14577.7	14475.3	18201.6	23116.2	33219	19359.7	13040.8	14302.5	9299.87	18012.1	8222.38	16550	x	x	x	x	HMDB0014327	Baclofen	M+FA-H	C10H12ClNO2	35	20.5	0.846314	55.376	http://nonlinear.com/redirect/outbound?p=hmdb&param=HMDB0014327	0.0244948	2.12836
	7.11_451.2686m/z		451.269	1	7.10683	0.299317	11	0.758171	1.64413	Ctrl	JEV	100 - 28.1	285442	20.51	425342	203744	204094	368926	225104	181400	216379	151906	193050	125327	459864	172606	219663	370188	194961	200853	219780	171654	108887	143290	x	x	x	x	HMDB0000391	7-Ketodeoxycholic acid	M+FA-H	C24H38O5	51.5	66.9	-3.77816	95.1397	http://nonlinear.com/redirect/outbound?p=hmdb&param=HMDB0000391	0.0358356	7.46531
	1.05_275.0222m/z		275.022	1	1.05078	0.1706	53	0.758171	1.68087	Ctrl	JEV	100 - 70.1	7216.08	15.76	7386.91	5894.92	8966.08	7192.99	6639.5	6662.58	3898.74	4970.56	2750.03	3183.42	7986.44	4993.99	9650.01	7217.6	5750.44	7377.07	3960.01	5616.74	1551.12	3639.69	x	x	x	x	HMDB0041724	Dihydroferulic acid 4-sulfate	M-H	C10H12O7S	33.1	6.1	-3.16066	63.0996	http://nonlinear.com/redirect/outbound?p=hmdb&param=HMDB0041724	0.0116381	1.3355
	8.20_333.2045m/z		333.204	1	8.19828	0.107067	105	0.758171	1.76966	Ctrl	JEV	100 - 19 - 8.99	8216.33	35.13	12894	6761.49	8037.54	5167.86	8220.72	4445.52	2732.51	7465.95	2481.21	6089.22	13940.5	5728.13	8650.64	5185.54	7119.93	4922.26	2775.45	8436.54	1399.49	6961.97	x	x	x	x	HMDB0001381	Prostaglandin H2	M-H2O-H	C20H32O5	41.1	20.7	-7.47711	93.0447	http://nonlinear.com/redirect/outbound?p=hmdb&param=HMDB0001381	0.0470934	1.32571
	4.68_349.1995m/z		349.2	1	4.6817	0.21435	88	0.758171	1.83392	Ctrl	JEV	100 - 21.8	27736.4	32.31	21895.5	38737.6	20275	21546.1	36227.7	33315.1	8434.58	16293.2	6143.56	11433.9	23672.6	32817.3	21821.5	21619.8	31376.7	36887.8	8567.14	18411.3	3465.19	13072.7	x	x	x	x	CSID4445307	(4R,5S,6S,7S,9R,11E,13E,16R)-7-Ethyl-4,6-dihydroxy-5-methoxy-9,16-dimethyloxacyclohexadeca-11,13-diene-2,10-dione	M-H2O-H	C20H32O6	41.7	19.6	-6.85856	96.477	http://nonlinear.com/redirect/outbound?p=chemspider&param=4445307	0.0498259	2.40931
	3.06_160.0365m/z		160.036	1	3.05503	0.1492	22	0.758171	1.88588	Ctrl	JEV	100 - 10.2	13359.7	23.17	15497.6	14576.7	7883.7	14585.2	14255.2	4140.18	5220.69	7888.31	4883.77	13287.3	16755.4	12349	8485.07	14635.1	12346.3	4584.17	5302.74	8913.81	2754.63	15191.7	x	x	x	x	CSID6602	FG7300000	M-H	C9H7NO2	44.2	44.7	-24.338	99.1914	http://nonlinear.com/redirect/outbound?p=chemspider&param=6602	0.0208438	1.8894
	0.98_135.0276m/z		135.028	1	0.9801	0.0921	35	0.758171	1.91504	Ctrl	JEV	100 - 7.23	6509.13	19.83	8757.47	6273.65	6156.55	5261.46	6096.52	3783.07	2478.15	3957.18	3893.38	2882.98	9468.25	5314.84	6626.17	5279.46	5280.17	4188.76	2517.09	4471.62	2196.01	3296.19	x	x	x	x	HMDB0032935	1-(2-Thienyl)-1-butanone	M-H2O-H	C8H10OS	39.5	5.39	1.01446	93.1086	http://nonlinear.com/redirect/outbound?p=hmdb&param=HMDB0032935	0.000864501	1.45641
	1.02_152.0296n	152.03	151.022	1	1.0158	0.127783	6	0.758171	2.07817	Ctrl	JEV	100 - 9.17 - 1.01	31211.6	27.39	45028.2	30125.1	32012	22433.5	26459	21528.7	7455.16	21196.9	14123.2	10790	48682.8	25521	34453.9	22510.3	22916	23837.4	7572.32	23952.5	7966.03	12336.5	x	x	x	x	HMDB0001182	6,8-Dihydroxypurine	M-H, M+FA-H	C5H4N4O2	41.2	31.9	-24.8809	97.6718	http://nonlinear.com/redirect/outbound?p=hmdb&param=HMDB0001182	0.010147	3.15175
	7.82_795.5359m/z		795.536	1	7.82063	0.07875	7	0.758171	2.16836	Ctrl	JEV	100 - 50.4 - 38.3 - 5.15 - 9.02 - 4.4	4858.87	39.78	8395.3	2779.85	2432.25	5211.49	5475.44	3400.78	2892.46	2089.34	1351.88	1469.56	9076.68	2355.01	2617.78	5229.32	4742.26	3765.47	2937.92	2360.96	762.511	1680.19	x	x	x	x	HMDB0010572	PG(16:0/18:0)	M+FA-H	C40H79O10P	36.9	13.1	-4.56035	76.6592	http://nonlinear.com/redirect/outbound?p=hmdb&param=HMDB0010572	0.0360492	1.1436
	7.11_827.5351m/z		827.535	1	7.10683	0.134917	1	0.758171	2.18298	Ctrl	JEV	100 - 53.2 - 37.8 - 14.2	18819.8	38.04	32774.9	11280.1	9959.33	24909.6	15175.1	11501.6	11724.4	9201.05	4069.58	6609.13	35435	9556.14	10719	24994.9	13143.1	12735	11908.7	10397.2	2295.39	7556.4	x	x	x	x	CSID82577	3581950	2M-H	C24H39NaO4	31	0	-8.23254	63.9732	http://nonlinear.com/redirect/outbound?p=chemspider&param=82577	0.0391013	2.23799
	4.18_544.1419m/z		544.142	1	4.17535	0.0785167	2	0.758171	2.20778	Ctrl	JEV	100 - 32.6 - 9.96	11040.2	32.76	12312.5	4602.83	12673.4	12372.9	13239.7	5129.5	9083.68	6278.67	1603.29	2907.85	13311.8	3899.38	13640.1	12415.2	11466.8	5679.59	9226.43	7094.9	904.314	3324.63	x	x	x	x	CSID134000	Esorubicin Hydrochloride	M-H2O-H	C27H29ClNO10	33.6	0	6.96999	76.0711	http://nonlinear.com/redirect/outbound?p=chemspider&param=134000	0.0408368	1.85587
	3.30_131.0677m/z		131.068	1	3.29793	0.200083	41	0.758171	2.35146	Ctrl	JEV	100 - 6.24 - 0.182	20633	62.85	43271.5	16831.5	18631.9	12290.8	12139.4	9081.75	2664.28	6350.88	20385.3	5390.58	46783.6	14259.1	20053.1	12332.9	10513.8	10055.7	2706.15	7176.51	11498	6163.2	x	x	x	x	HMDB0010718	(R)-3-Hydroxyhexanoic acid	M-H	C6H12O3	38.6	19.6	-27.9051	98.9556	http://nonlinear.com/redirect/outbound?p=hmdb&param=HMDB0010718	0.0460855	2.25421
	2.47_425.0070m/z		425.007	1	2.47088	0.171517	7	0.758171	2.39733	Ctrl	JEV	100 - 16.6 - 19.2 - 1.78 - 0.456	22180	39.68	19405.7	11671.1	35451.1	19401.4	24970.9	20840.8	9308.96	7669.35	3041.13	5399.55	20980.8	9887.42	38155.3	19467.8	21627.2	23075.8	9455.25	8666.38	1715.31	6173.46	x	x	x	x	HMDB0000682	Indoxyl sulfate	2M-H	C8H7NO4S	34.4	0.223	-11.527	84.254	http://nonlinear.com/redirect/outbound?p=hmdb&param=HMDB0000682	0.0242048	2.63541
	4.24_144.0419m/z		144.042	1	4.23958	0.0928	14	0.758171	2.52621	Ctrl	JEV	100 - 8.82	3409.88	47.67	6426.62	3531.68	3033.38	2115.65	1942.06	1864.63	644.909	1937.88	666.54	1635.03	6948.22	2991.94	3264.77	2122.89	1682.01	2064.59	655.044	2189.81	375.953	1869.37	x	x	x	x	HMDB0062406	4-Oxo-1-(3-pyridyl)-1-butanone	M-H2O-H	C9H9NO2	44.4	45.4	-22.0231	97.8927	http://nonlinear.com/redirect/outbound?p=hmdb&param=HMDB0062406	0.020981	1.03011
	1.14_151.0224m/z		151.022	1	1.14358	0.271467	17	0.758171	2.53674	Ctrl	JEV	100 - 9.05 - 2.73	13840	51.3	25976.6	13246.6	11826.3	7571.11	10579.3	8886.67	2257.46	7738.72	5252.31	3143.89	28084.9	11222.1	12728.4	7597.02	9162.71	9839.67	2292.94	8744.78	2962.5	3594.5	x	x	x	x	HMDB0032234	2,5-Dimethyl-3-furanthiol acetate	M-H2O-H	C8H10O2S	39.6	2.01	0.540432	96.8275	http://nonlinear.com/redirect/outbound?p=hmdb&param=HMDB0032234	0.0189162	2.09063
	3.70_193.0469m/z		193.047	1	3.69717	0.136033	82	0.758171	2.5944	Ctrl	JEV	100 - 11.8	31822.8	49.14	34122.1	21361.1	69461.5	20806.7	13362.8	18568.8	7412.5	17741.4	5056.31	12550.8	36891.5	18096.5	74760	20877.9	11573.5	20560.1	7529	20047.9	2851.94	14349.6	x	x	x	x	HMDB0034493	Valtrate	M-H2O-H	C10H12O5	39.7	18.5	-17.6709	97.8881	http://nonlinear.com/redirect/outbound?p=hmdb&param=HMDB0034493	0.0437775	2.94196
	0.92_146.0422m/z		146.042	1	0.915867	0.0999333	30	0.758171	2.61366	Ctrl	JEV	100 - 3.43	3861.5	49.1	6756.63	2467.5	4121.92	4084.59	1876.87	2306.52	804.234	743.59	2197.97	1334.84	7305.01	2090.39	4436.34	4098.57	1625.55	2553.87	816.873	840.259	1239.74	1526.16	x	x	x	x	HMDB0002931	N-Acetylserine	M-H	C5H9NO4	38.6	19.8	-25.11	96.6636	http://nonlinear.com/redirect/outbound?p=hmdb&param=HMDB0002931	0.0176871	1.13541
	3.55_493.0791m/z		493.079	1	3.5542	0.0706833	9	0.758171	2.7536	Ctrl	JEV	100 - 23.6 - 13.7	6014.55	40.66	7107.99	2973.2	8282.92	3758.2	7950.43	3048.38	2165.93	3103.06	1363.11	1240.76	7684.88	2518.81	8914.74	3771.06	6885.83	3375.29	2199.97	3506.47	768.844	1418.6	x	x	x	x	HMDB0127812	3,4,5-trihydroxy-6-{[3-hydroxy-2-(3-methoxyphenyl)-5-sulfino-3,4-dihydro-2H-1-benzopyran-7-yl]oxy}oxane-2-carboxylate	M-H2O-H	C22H24O12S	38.1	0.332	-3.81478	94.4987	http://nonlinear.com/redirect/outbound?p=hmdb&param=HMDB0127812	0.00806829	1.51791
	7.11_812.5430m/z		812.543	1	7.10683	0.1492	66	0.758171	3.06652	Ctrl	JEV	100 - 78.3 - 31	31474.8	48.56	70702.7	10707	16389.5	42620	16954.9	12050.6	18008	9054.08	5870.43	6336.96	76441	9070.67	17639.6	42765.9	14684.6	13342.9	18291	10231.1	3311.14	7245.22	x	x	x	x	HMDB0009228	PE(20:0/18:4(6Z,9Z,12Z,15Z))	M+FA-H	C43H78NO8P	43.7	45.3	-2.22019	75.8672	http://nonlinear.com/redirect/outbound?p=hmdb&param=HMDB0009228	0.0447505	3.03987
	6.54_299.1836m/z		299.184	1	6.54388	0.13535	19	0.758171	3.27872	Ctrl	JEV	100 - 12.8 - 0.949	5869.12	38.33	11884.2	3703.68	2915.59	6350.27	4491.87	1996.71	1118.79	1795.99	2820.81	1218.02	12848.7	3137.64	3137.99	6372	3890.39	2210.83	1136.38	2029.47	1591.04	1392.59	x	x	x	x	HMDB0035780	8-Hydroxy-4(6)-lactarene-5,14-diol	M+FA-H	C15H26O3	39.1	11.5	-11.125	95.8473	http://nonlinear.com/redirect/outbound?p=hmdb&param=HMDB0035780	0.00556522	1.46522
	2.29_269.1460m/z		269.146	1	2.2851	0.185583	4	0.758171	5.99009	Ctrl	JEV	100 - 16.6	5898.18	90.05	16084.8	3732.49	2201.89	3948.52	3523.25	693.651	278.144	230.855	1381.29	2339.34	17390.2	3162.06	2369.85	3962.03	3051.47	768.038	282.515	260.867	779.099	2674.64	x	x	x	x	CSID38408	Isamoxole	M+FA-H	C12H20N2O2	37.2	9.61	-21.003	96.7066	http://nonlinear.com/redirect/outbound?p=chemspider&param=38408	0.00956478	1.47521
	0.95_695.2972m/z		695.297	1	0.95155	0.06425	2	0.758171	11.515	Ctrl	JEV	100 - 26.9 - 3.65	12829.3	46.22	2576.32	15542.5	2894.71	1310.74	41822	796.316	993.358	853.803	2026.2	901.002	2785.42	13167.2	3115.51	1315.23	36221.9	881.713	1008.97	964.8	1142.85	1030.14	x	x	x	x	CSID390543	alstonine	2M-H	C21H20N2O3	36.5	0.0354	13.8756	97.0833	http://nonlinear.com/redirect/outbound?p=chemspider&param=390543	0.0328023	2.10221
pos	0.66_265.0154m/z		265.015	1	0.66355	0.107483	18	0.0507096	Infinity	JEV	Ctrl	100 - 73.7 - 7.14	2198.11	101.72	0	0	0	0	0	3669.06	134.184	1906.36	5199.6	81.326	0	0	0	0	0	4329.64	132.415	1985.19	4265.34	137.836	x	x	x	x	HMDB0002181	Phytoene	2M+H	C40H64	34.9	0	6.54798	81.8779	http://nonlinear.com/redirect/outbound?p=hmdb&param=HMDB0002181	2.66e-05	1.52971
	0.66_792.3209n	792.321	793.328	1	0.66355	0.0716167	1	0.656122	Infinity	JEV	Ctrl	100 - 24.4 - 0.793	1671.14	157.43	0	0	0	0	0	125.2	2145.24	0	6085.24	0	0	0	0	0	0	147.741	2116.96	0	4991.85	0	x	x	x	x	CSID4444372	2-Hexaprenylphenol	M+NH4	C36H54O	34.9	0.855	-9.83907	84.2582	http://nonlinear.com/redirect/outbound?p=chemspider&param=4444372	0.0486769	1.14064
	0.70_469.0128m/z		469.013	1	0.699367	0.0428333	5	0.656122	Infinity	JEV	Ctrl	100 - 60.8 - 18.4 - 2.88	12131.4	153.23	0	0	0	0	0	425.667	42443.3	0	17787.9	0	0	0	0	0	0	502.304	41883.7	0	14591.8	0	x	x	x	x	HMDB0114653	PE-NMe2(24:1(15Z)/22:2(13Z,16Z))	M+H	C53H100NO8P	39.2	0.468	-1.603	97.6647	http://nonlinear.com/redirect/outbound?p=hmdb&param=HMDB0114653	0.0485284	3.1064
	0.81_141.0661m/z		141.066	1	0.806433	0.0999333	29	0.656122	Infinity	JEV	Ctrl	100 - 50.3 - 18.8	3093.71	169.6	0	0	0	0	0	687.846	12302.8	0	2477.87	0	0	0	0	0	0	811.685	12140.6	0	2032.65	0	x	x	x	x	HMDB0009508	PE(22:0/24:0)	M+Na	C51H102NO8P	38.6	0.0239	0.310939	93.111	http://nonlinear.com/redirect/outbound?p=hmdb&param=HMDB0009508	0.0435822	1.50584
	0.81_196.0456n	196.046	197.053	1	0.813567	0.0928	2	0.656122	1629.27	JEV	Ctrl	100 - 56 - 19.2 - 4.77	9466.47	111.46	8.46521	2.86485	0	15.9197	1.80145	201.258	4.88525	6.12061	40366.1	6753.98	12.645	2.54943	0	15.8461	1.72405	237.493	4.82084	6.3737	33113.1	11447	x	x	x	x	HMDB0116817	CL(8:0/8:0/8:0/18:2(9Z,11Z))	M+H	C51H94O17P2	39.6	0	-0.617404	98.6904	http://nonlinear.com/redirect/outbound?p=hmdb&param=HMDB0116817	0.0487772	2.53883
	0.82_260.0534m/z		260.053	1	0.820717	0.1142	19	0.656122	76.0816	JEV	Ctrl	100 - 42.4 - 10.3	1515.44	170.12	78.2321	0	0	21.3607	0	45.8475	29.6572	21.692	1229.35	6250.63	116.86	0	0	21.262	0	54.1018	29.2662	22.589	1008.46	10593.9	x	x	x	x	CSID389912	3-Chloro-6-[2,2-dichloro-1-(4-chlorophenyl)vinyl]-1,2-benzenediol	2M+H	C14H8Cl4O2	23.1	0	-14.3505	30.3718	http://nonlinear.com/redirect/outbound?p=chemspider&param=389912	0.0300779	1.02053
	0.86_134.0224n	134.022	152.058	1	0.863533	0.0999167	11	0.656122	14.8946	JEV	Ctrl	100 - 45.2 - 41.2 - 32	2071.35	65.53	92.7076	81.3232	220.146	252.796	48.3658	660.031	171.555	162.228	6286.1	3076.84	138.483	72.3694	223.068	251.628	46.2878	778.863	169.293	168.936	5156.62	5214.79	x	x	x	x	CSID389895	gamma-Pentachlorocyclohexene	2M+H	C6H5Cl5	23.4	0	-13.0391	30.8185	http://nonlinear.com/redirect/outbound?p=chemspider&param=389895	0.0414586	1.29419
	0.97_136.0388n	136.039	137.046	1	0.9706	0.470983	14	0.656122	11.2955	JEV	Ctrl	100	1628.98	80.68	98.8884	35.7199	62.256	315.998	208.21	539.763	193.549	438.83	4326.78	2645.96	147.715	31.7871	63.0823	314.539	199.265	636.941	190.997	456.976	3549.35	4484.51	x	x	x	x	CSID7009	2,3-Dibromopropanol	2M+H	C3H6Br2O	19.7	0	-22.1516	20.0804	http://nonlinear.com/redirect/outbound?p=chemspider&param=7009	0.017415	1.18504
	1.05_193.0987m/z		193.099	1	1.04842	0.142283	32	0.656122	5.95971	JEV	Ctrl	100 - 64.5 - 10.9	4961.41	30.13	843.715	1001.55	721.426	475.208	1120.57	3851.6	944.337	13731.2	4525.35	1754.54	1260.31	891.275	731	473.013	1072.42	4545.04	931.886	14299	3712.24	2973.69	x	x	x	x	HMDB0015101	Telmisartan	2M+H	C33H30N4O2	38.9	12.3	0.0834337	82.1545	http://nonlinear.com/redirect/outbound?p=hmdb&param=HMDB0015101	0.0177625	1.96182
	1.56_137.0459m/z		137.046	1	1.56303	0.456283	14	0.656122	4.86439	JEV	Ctrl	100 - 95.3 - 21.4	4481.96	31.64	1016.85	452.182	1133.24	1164.75	839.885	3181.9	601.526	2132.07	8563.63	7930.66	1518.93	402.396	1148.28	1159.37	803.8	3754.76	593.595	2220.24	7024.93	13441.3	x	x	x	x	CSID6366	Tetrabromobisphenol A	M+NH4	C15H12Br4O2	20.5	0	-5.47564	8.55162	http://nonlinear.com/redirect/outbound?p=chemspider&param=6366	0.0408859	1.95456
	1.61_213.1285m/z		213.129	1	1.613	0.22085	21	0.656122	4.67026	JEV	Ctrl	100 - 50.5 - 72	1498.85	37.55	207.026	234.671	464.293	437.431	261.252	415.037	999.537	431.48	2573.71	3074.48	309.247	208.833	470.455	435.411	250.028	489.76	986.358	449.322	2111.26	5210.79	x	x	x	x	CSID2297511	Propineb	2M+H	C5H8N2S4Zn	31.5	0	-0.578414	58.0904	http://nonlinear.com/redirect/outbound?p=chemspider&param=2297511	0.0244231	1.10464
	1.66_164.0883m/z		164.088	1	1.65583	0.157183	36	0.656122	4.51984	JEV	Ctrl	100 - 50.1	1308.85	49.28	211.746	373.975	181.933	179.504	500.738	1625.11	278.559	1073.07	2358.56	1208.96	316.297	332.8	184.348	178.675	479.224	1917.7	274.886	1117.44	1934.77	2049.01	x	x	x	x	HMDB0040654	Mabioside E	M+H	C48H78O22S	37.4	9.66	-2.26764	79.9319	http://nonlinear.com/redirect/outbound?p=hmdb&param=HMDB0040654	0.010257	1.12848
	1.71_223.1420m/z		223.142	1	1.71308	0.349317	25	0.656122	4.45792	JEV	Ctrl	100 - 3.25	1591.07	72.14	41.8735	1003.34	85.3156	496.969	157.041	2637.51	526.829	1711.21	2769.14	310.657	62.549	892.87	86.4479	494.674	150.294	3112.37	519.883	1781.97	2271.58	526.517	x	x	x	x	HMDB0010727	3-Oxododecanoic acid	M+NH4	C12H22O3	37.4	7.26	-9.22046	89.8673	http://nonlinear.com/redirect/outbound?p=hmdb&param=HMDB0010727	0.0402722	1.15739
	2.01_206.1148m/z		206.115	1	2.01308	0.277883	17	0.656122	2.98584	JEV	Ctrl	100 - 90.3 - 83.4	33217.8	43.03	19370.6	8817.49	7482.83	8869.67	11084.8	25491.1	12143.1	13104.1	40970.1	74380.3	28935	7846.67	7582.14	8828.7	10608.6	30080.5	11983	13646	33608.6	126064	x	x	x	x	HMDB0030005	Austalide A	2M+H	C28H36O9	29	0	4.43032	50.0284	http://nonlinear.com/redirect/outbound?p=hmdb&param=HMDB0030005	0.0428421	4.60822
	2.01_223.1426m/z		223.143	1	2.00573	0.12085	26	0.656122	2.716	JEV	Ctrl	100 - 74.8 - 44.2 - 16.2	2433.78	49.59	1495.83	284.651	706.972	981.507	1011.5	2861.38	1197.63	1057.97	2086.65	4965.29	2234.41	253.31	716.354	976.973	968.041	3376.54	1181.84	1101.71	1711.72	8415.43	x	x	x	x	HMDB0039515	Graecunin E	M+Na	C51H82O22	37.7	13.1	1.52097	77.2982	http://nonlinear.com/redirect/outbound?p=hmdb&param=HMDB0039515	0.0418085	1.25729
	2.06_251.1434m/z		251.143	1	2.06233	0.220767	19	0.656122	2.64361	JEV	Ctrl	5.4 - 5.6 - 88.8 - 100 - 58.1	7658.2	36.46	4586.05	2905.68	2119.37	1897.37	2975.88	9391.35	3251.09	4171.42	6024.86	15452.3	6850.45	2585.76	2147.5	1888.61	2848.03	11082.2	3208.22	4343.91	4942.32	26189.3	x	x	x	x	CSID391743	(5R)-5'-O-(5-Amino-5-deoxy-2-O-sulfo-beta-D-ribofuranosyl)-5'-C-[5-carboxy-6-({3-[(4-carboxy-3-methylbutanoyl)oxy]-12-methyltridecanoyl}oxy)-1,4-dimethyl-3-oxo-1,4-diazepan-2-yl]uridine	M+NH4	C42H67N5O21S	21.4	1	3.50459	10.0131	http://nonlinear.com/redirect/outbound?p=chemspider&param=391743	0.0272571	2.22022
	2.11_264.1029m/z		264.103	1	2.10517	0.093	28	0.63455	2.46253	JEV	Ctrl	100 - 41.2 - 24.8 - 16.7	4081.81	23.92	2216.35	1882.01	1511.28	1193.84	1484.37	4835.78	2147.5	4407.58	4306.38	4711.8	3310.7	1674.79	1531.34	1188.32	1420.6	5706.41	2119.18	4589.83	3532.61	7985.8	x	x	x	x	CSID30791181	(1'R,3S,3'R,3aS,4S,4aR,7'R,7aR,8R,9'R,9aR,10'R)-4-Hydroxy-4a,8,9'-trimethyl-4'-methylene-4,4a,7a,8,9,9a-hexahydro-5'H,14'H-spiro[azuleno[6,5-b]furan-3,13'-[6]oxatetracyclo[9.2.2.0~1,10~.0~3,7~]pentadecane]-2,5,5',14'(3aH)-tetrone	2M+H	C29H34O7	38	17.5	-3.04565	76.2306	http://nonlinear.com/redirect/outbound?p=chemspider&param=30791181	0.0014209	1.89422
	2.14_283.1585m/z		283.158	1	2.14107	0.23575	26	0.656122	2.20203	JEV	Ctrl	100 - 35.8 - 3.01 - 2.52	4060.58	45.68	3138.27	1426.1	1480.53	2189.42	985.757	4156.41	5949.29	6004.63	2247.28	1945.28	4687.82	1269.08	1500.17	2179.31	943.404	4904.73	5870.84	6252.92	1843.49	3296.97	x	x	x	x	HMDB0036349	Amlaic acid	M+Na	C27H24O19	37.5	0	-3.62575	91.7442	http://nonlinear.com/redirect/outbound?p=hmdb&param=HMDB0036349	0.0392063	1.56549
	2.19_259.1722m/z		259.172	1	2.19103	0.0785167	32	0.656122	2.13762	JEV	Ctrl	100 - 67.8	10284	23.59	4249.68	5949.56	3347.58	5963.57	4544.44	18182	5064.62	11413.1	9491.12	7269.25	6347.99	5294.5	3392.01	5936.02	4349.19	21455.5	4997.84	11885	7785.76	12320.3	x	x	x	x	HMDB0034771	3,7-Dimethyl-5-octene-1,7-diol 1-glucoside	2M+H	C16H30O7	34.1	2.65	0.855981	68.9073	http://nonlinear.com/redirect/outbound?p=hmdb&param=HMDB0034771	0.0209007	2.47247
	2.23_236.1519n	236.152	254.147	1	2.23385	0.235767	6	0.656122	1.9089	JEV	Ctrl	79.8 - 100 - 11.5 - 3.52	16659.4	30.21	10980.1	11988	6217.29	6420.99	8029.81	19285.9	10812.7	9702.58	13539.8	29956.1	16401.6	10668.1	6299.8	6391.33	7684.81	22758.1	10670.1	10103.8	11107	50771.2	x	x	x	x	CSID30791854	1-Ethyl-6-fluoro-4-oxo-7-(1-piperazinyl)-1,4-dihydro-1,8-naphthyridine-3-carboxylic acid hydrate (3:2)	M+NH4, M+Na	C45H55F3N12O11	33	0	-1.79465	67.3258	http://nonlinear.com/redirect/outbound?p=chemspider&param=30791854	0.0423516	2.83498
	2.26_466.2070m/z		466.207	1	2.25527	0.135633	2	0.656122	1.83014	JEV	Ctrl	100 - 21.8 - 16 - 0.512 - 0.537	5700.19	33.4	4832.15	2686.26	2547.72	3307.68	2199.26	5763.61	7901.22	7668.8	4002.01	3165.3	7218.06	2390.49	2581.53	3292.4	2104.77	6801.29	7797.04	7985.9	3282.94	5364.72	x	x	x	x	HMDB0061726	Dideoxycytidine 5'-Triphosphate	M+NH4	C9H16N3O12P3	35.1	0.424	6.87817	82.7383	http://nonlinear.com/redirect/outbound?p=hmdb&param=HMDB0061726	0.0326169	1.71274
	2.28_271.1648m/z		271.165	1	2.28382	0.407217	15	0.656122	1.78854	JEV	Ctrl	100 - 40.3 - 6.24	1940.48	25.31	757.765	1377.9	831.289	1266.75	1191.07	1557.62	1987.03	2782.4	1514.64	1860.72	1131.92	1226.19	842.322	1260.9	1139.9	1838.06	1960.83	2897.45	1242.49	3153.64	x	x	x	x	CSID54139	Phenol, 3-(2-(1,1-dimethylethyl)-3-methyl-5-oxazolidinyl)-	M+NH4	C14H21NO2	38	17.9	7.19646	80.0552	http://nonlinear.com/redirect/outbound?p=chemspider&param=54139	0.00692536	1.06134
	2.31_1029.4811m/z		1029.48	1	2.30523	0.135617	2	0.656122	1.75663	JEV	Ctrl	100	3321.17	29.72	3493.96	1553.64	1391.6	1813.9	1200.13	3613.65	4099.85	4269.22	1945.88	2677.27	5219.14	1382.58	1410.07	1805.52	1148.57	4264.25	4045.8	4445.75	1596.25	4537.58	x	x	x	x	HMDB0031153	Diisobutylcarbinol	M+NH4	C9H20O	33.4	0	-24.6112	90.3707	http://nonlinear.com/redirect/outbound?p=hmdb&param=HMDB0031153	0.0354855	1.26183
	2.38_210.1124m/z		210.112	1	2.37662	0.0927833	43	0.656122	1.73768	JEV	Ctrl	100 - 25.9 - 4.61	69679.3	29.59	27119.5	33897.1	42990.5	58824.6	37663.8	50328.5	49723.1	66256.9	89707.1	92380.7	40510	30165	43561.1	58552.9	36045.6	59389.6	49067.5	68996.6	73588.6	156572	x	x	x	x	HMDB0031402	23-Acetoxysoladulcidine	M+Na	C29H47NO4	46.5	39.2	-0.412117	93.8027	http://nonlinear.com/redirect/outbound?p=hmdb&param=HMDB0031402	0.0180397	5.99478
	2.49_1090.0160m/z		1090.02	1	2.49098	0.163467	4	0.656122	1.71191	JEV	Ctrl	100 - 36.2	6152.8	8.35	3960.11	3840.19	3329.31	3287.05	3553.87	7485.17	3553.57	4432.17	7349.26	7943.82	5915.44	3417.38	3373.5	3271.87	3401.17	8832.8	3506.72	4615.44	6028.75	13463.6	x	x	x	x	HMDB0127539	2-amino-4-({1-[(carboxymethyl)-C-hydroxycarbonimidoyl]-2-{[(4S)-4,10,14,16-tetrahydroxy-5,9,11,13,13-pentamethyl-2-[1-(2-methyl-1,3-thiazol-4-yl)prop-1-en-2-yl]-12-oxo-1-azacyclohexadec-1(16)-en-5-yl]sulfanyl}ethyl}-C-hydroxycarbonimidoyl)butanoic acid	M+H	C37H59N5O11S2	40.4	29	4.80322	78.3422	http://nonlinear.com/redirect/outbound?p=hmdb&param=HMDB0127539	0.0188759	1.76997
	2.51_1039.4755m/z		1039.48	1	2.50527	0.0920833	1	0.656122	1.65437	JEV	Ctrl	100 - 92.1	9513.39	6.91	5895.55	5300.82	6352.49	5625.48	5577.95	12462.9	6537.33	6025.34	8885.77	13655.5	8806.53	4717.19	6436.8	5599.5	5338.3	14706.8	6451.14	6274.49	7289.18	23144.1	x	x	x	x	CSID25068249	Tubulysin B	M+Na	C42H63N5O10S	32.8	0.278	-4.32532	68.7807	http://nonlinear.com/redirect/outbound?p=chemspider&param=25068249	0.0273051	2.06286
	2.56_237.1572m/z		237.157	1	2.56167	0.2991	23	0.656122	1.55337	JEV	Ctrl	100 - 34	17043.1	15.19	8930.74	12869.7	9642.8	11213.4	12201.6	14783.1	15793.2	22738.8	14810.2	17090	13340.4	11452.8	9770.77	11161.6	11677.3	17444.7	15585	23679.1	12149.1	28965.1	x	x	x	x	CSID10128496	dihydromonacolin L	M+Na	C19H30O3	45.8	43	-2.06014	88.3686	http://nonlinear.com/redirect/outbound?p=chemspider&param=10128496	0.00332144	2.88607
	2.56_251.1734m/z		251.173	1	2.56167	0.163467	25	0.656122	1.5378	JEV	Ctrl	100 - 50.5	6411.61	15.4	4152.05	4822.88	3392.4	4790.78	3688.57	4662.28	7291.26	7129.08	5179.95	7795.48	6202.16	4291.87	3437.42	4768.66	3530.09	5501.67	7195.13	7423.87	4249.22	13212.2	x	x	x	x	HMDB0031007	1-Acetoxy-2-hydroxy-16-heptadecyn-4-one	M+Na	C19H32O4	37.1	8.8	1.72114	78.7566	http://nonlinear.com/redirect/outbound?p=hmdb&param=HMDB0031007	0.00965782	1.71475
	2.60_260.0771m/z		260.077	1	2.59735	0.0428333	23	0.656122	1.5136	JEV	Ctrl	100 - 6.39	3995.88	14.48	4097.47	2436.37	2097.28	2515.02	2053.81	4240.51	4275.57	4586.77	3099.47	3777.07	6120.63	2168.12	2125.12	2503.41	1965.57	5003.97	4219.19	4776.43	2542.56	6401.58	x	x	x	x	HMDB0004461	Benzamide	M+Na	C7H7NO	37	4.75	17.8376	98.0133	http://nonlinear.com/redirect/outbound?p=hmdb&param=HMDB0004461	0.0150679	1.30551
	2.60_285.1473m/z		285.147	1	2.59735	0.0713833	19	0.656122	1.46753	JEV	Ctrl	100 - 20.8 - 2.03	5873.21	19.3	4039.49	4355.41	2869.29	3780.8	4965.57	5530.24	6514.81	3798.29	6187.55	7335.15	6034.03	3875.88	2907.37	3763.33	4752.22	6525.9	6428.92	3955.35	5075.78	12432	x	x	x	x	HMDB0061784	3-Allyl-1-cyclohexene	2M+H	C9H14	39.5	8.64	-0.709187	89.8591	http://nonlinear.com/redirect/outbound?p=hmdb&param=HMDB0061784	0.0319013	1.50014
	2.62_1027.4423m/z		1027.44	1	2.61877	0.427733	1	0.656122	1.45198	JEV	Ctrl	100 - 20.9 - 2.03	16995.1	19.92	11778.1	12706.9	8251.87	11162.4	14624.8	16113.5	18718.3	11242	18119.8	20781.9	17593.6	11307.8	8361.39	11110.8	13996.5	19014.5	18471.5	11706.8	14864.1	35222.2	x	x	x	x	CSID59421	SL3675000	M+H	C18H30O	43.5	18.5	0.022997	98.9663	http://nonlinear.com/redirect/outbound?p=chemspider&param=59421	0.0318555	2.52855
	2.63_578.2771m/z		578.277	1	2.63303	0.128483	2	0.656122	1.41229	JEV	Ctrl	100 - 23.2 - 3.31	29347.5	20.05	20126.7	23080.9	14844.3	19818.7	26030	27941.9	33281.5	19352.7	32595.9	33565.4	30064.5	20539.6	15041.3	19727.1	24911.7	32972.5	32842.7	20153	26739.1	56888.3	x	x	x	x	HMDB0061864	Dihomolinoleic acid	M+H	C18H32O2	40	4.52	0.675905	96.4175	http://nonlinear.com/redirect/outbound?p=hmdb&param=HMDB0061864	0.0409448	3.17553
	2.63_996.4048n	996.405	1014.44	1	2.63303	0.663517	1	0.656122	1.40309	JEV	Ctrl	100 - 11.5	125896	16.59	132019	87352	74146.5	80587.6	74532.1	139163	135284	145060	94057.4	115917	197205	77734.4	75130.6	80215.4	71329.9	164218	133500	151058	77157.2	196461	x	x	x	x	CSID389608	4,8-Quinolinediol	M+H	C9H7NO2	49.5	50.9	1.02493	98.107	http://nonlinear.com/redirect/outbound?p=chemspider&param=389608	0.029879	6.46589
	2.64_144.0441m/z		144.044	1	2.64018	0.0999333	16	0.656122	1.37665	JEV	Ctrl	100 - 31.8	3258.9	15.12	2166.46	2660.32	1830.22	2359.75	2819.62	3171.8	3783.09	2467.7	3426.36	3445.52	3236.17	2367.41	1854.51	2348.85	2698.48	3742.85	3733.21	2569.74	2810.72	5839.65	x	x	x	x	HMDB0014739	Linezolid	M+NH4	C16H20FN3O4	40.1	13	0.825074	88.29	http://nonlinear.com/redirect/outbound?p=hmdb&param=HMDB0014739	0.016044	1.0737
	2.64_162.0551m/z		162.055	1	2.64018	0.241983	21	0.656122	1.35432	JEV	Ctrl	100 - 71.8	7074.07	9.85	4461.68	5573.52	5759.17	5533.84	4788.49	6629.67	6997.97	6210.83	7634.13	7897.76	6664.68	4959.87	5835.61	5508.28	4582.76	7823.27	6905.7	6467.65	6262.44	13385.5	x	x	x	x	CSID12874	Terbutryn	M+NH4	C10H19N5S	33.1	11.8	9.37413	63.9261	http://nonlinear.com/redirect/outbound?p=chemspider&param=12874	0.00181602	1.65454
	2.64_162.1817m/z		162.182	1	2.64018	0.0642333	6	0.656122	1.34394	JEV	Ctrl	100 - 87 - 58.3	27947.6	10.32	19243.2	23350.9	18459.8	20205.8	22717.2	23737.9	21559.8	23989	31680.7	38770.7	28744.7	20779.9	18704.7	20112.5	21741.2	28011.6	21275.6	24980.9	25988.3	65710.7	x	x	x	x	HMDB0041328	3'-Deaminofusarochromanone	2M+H	C15H19NO4	27.7	4.91	-14.3829	48.5272	http://nonlinear.com/redirect/outbound?p=hmdb&param=HMDB0041328	0.0482252	2.73555
	2.64_469.0316m/z		469.032	1	2.64018	0.08565	6	0.656122	1.32901	JEV	Ctrl	100 - 16.9 - 0.599	6617.54	16.99	4757.57	5541.51	3754.41	4738.58	6104.46	6234.48	7479.41	4809.4	7371.78	7192.62	7106.67	4931.38	3804.23	4716.69	5842.18	7356.93	7380.8	5008.27	6047.23	12190.4	x	x	x	x	HMDB0034297	Ricinoleic acid	M+H, M+Na	C18H34O3	41	10.7	-1.07221	95.7366	http://nonlinear.com/redirect/outbound?p=hmdb&param=HMDB0034297	0.0411454	1.37966
	2.64_668.3038m/z		668.304	1	2.64018	0.107067	4	0.656122	1.29315	JEV	Ctrl	100 - 23	6079.8	14.72	4331.27	5158.89	3765.14	4718.98	5533.43	5811.37	7011.27	4538.72	6659.48	6378.13	6469.88	4590.89	3815.11	4697.19	5295.68	6857.65	6918.83	4726.4	5462.91	10810	x	x	x	x	HMDB0036753	Yucalexin P15	M+Na	C20H26O4	40.3	18.6	12.8496	96.5223	http://nonlinear.com/redirect/outbound?p=hmdb&param=HMDB0036753	0.0372235	1.27099
	2.64_675.0780m/z		675.078	1	2.64018	0.0571	2	0.656122	1.28266	JEV	Ctrl	100 - 7.27 - 0.973	5440.17	11.98	3838.27	4719.76	3663.47	4191.59	4793.57	5160.78	6060.4	4243.47	5902.31	5833.91	5733.45	4200.11	3712.09	4172.23	4587.61	6089.93	5980.49	4418.94	4841.79	9887.61	x	x	x	x	HMDB0040461	1,5-Dibutyl methyl hydroxycitrate	M+H, M+NH4, M+Na	C15H26O8	41.2	23.2	-6.35123	90.0964	http://nonlinear.com/redirect/outbound?p=hmdb&param=HMDB0040461	0.0201423	1.22555
	2.65_989.4651m/z		989.465	1	2.64732	0.114217	2	0.656122	1.25902	JEV	Ctrl	100 - 28.6 - 10.1	10546.9	12.07	7609.19	9202.46	6459.4	8804.06	9810.19	10227.9	12169.5	8743.16	10367	11226.9	11366.3	8189.25	6545.13	8763.4	9388.7	12069.4	12009	9104.69	8504.31	19028	x	x	x	x	HMDB0011470	LysoPE(0:0/14:0)	M+H	C19H40NO7P	42.3	21.9	-0.486711	90.075	http://nonlinear.com/redirect/outbound?p=hmdb&param=HMDB0011470	0.035321	1.60019
	2.66_557.7880m/z		557.788	1	2.6616	0.3205	1	0.656122	1.25668	JEV	Ctrl	100 - 47.1	11453.6	14.7	8644.14	10774.9	7075.4	9634.06	9442.59	12144.8	10248.8	11547.2	13820.8	9506.58	12912.3	9588.55	7169.3	9589.56	9036.9	14331.3	10113.6	12024.7	11337.5	16112.2	x	x	x	x	CSID390565	Baliospermin	M+Na	C32H50O8	41.4	21.1	0.557643	86.7063	http://nonlinear.com/redirect/outbound?p=chemspider&param=390565	0.0438199	1.62239
	2.68_180.1014m/z		180.101	1	2.683	0.164183	71	0.656122	1.24373	JEV	Ctrl	100 - 61.2	5101.24	6.41	4376.22	4254.77	3880.67	3766.04	4230.15	5193.51	4673.5	4291.93	4716.35	6630.94	6537.02	3786.31	3932.17	3748.65	4048.41	6128.54	4611.88	4469.4	3868.92	11238.5	x	x	x	x	CSID59135	Caroverine	M+NH4	C22H27N3O2	33.5	2.49	10.1694	75.8995	http://nonlinear.com/redirect/outbound?p=chemspider&param=59135	0.0320339	1.05309
	2.71_286.1473m/z		286.147	1	2.71157	0.0927833	31	0.656122	1.22458	JEV	Ctrl	100 - 73.4 - 81.8	19765.9	7.81	17460.6	17515.8	15006	15030.4	15691.9	18550.4	17363.9	16687.6	22020.8	24206.7	26081.9	15587.3	15205.1	14961	15017.7	21890.2	17134.9	17377.7	18064.1	41026.7	x	x	x	x	CSID391613	Chloramphenicol palmitate	M+NH4	C27H42Cl2N2O6	33.1	0.314	2.33592	68.1528	http://nonlinear.com/redirect/outbound?p=chemspider&param=391613	0.0395836	2.00286
	2.71_1041.6033m/z		1041.6	1	2.71157	0.0999333	1	0.656122	1.18363	JEV	Ctrl	100 - 25.6	6398.64	9.44	5632.62	6221.22	5138.74	4605.83	5431.24	6073.03	5859.8	5989.21	6829.66	7241.48	8413.77	5536.25	5206.94	4584.56	5197.89	7166.42	5782.54	6236.86	5602.51	12273.2	x	x	x	x	HMDB0129666	6-{4-[3-(3,7-dimethylocta-2,6-dien-1-yl)-7-hydroxy-8-(3-methylbut-2-en-1-yl)-4-oxo-4H-chromen-2-yl]-3-hydroxyphenoxy}-3,4,5-trihydroxyoxane-2-carboxylic acid	M+NH4	C36H42O11	39	17.4	-4.18649	82.6376	http://nonlinear.com/redirect/outbound?p=hmdb&param=HMDB0129666	0.0303863	1.08094
	2.78_166.1099n	166.11	333.179	1	2.78293	0.1287	3	0.656122	1.18101	JEV	Ctrl	100 - 16.8	8543.49	8.84	6842.27	8187.11	6972.73	6128.7	8039.54	8652.66	8572.24	9305.03	8895.18	7292.33	10220.7	7285.69	7065.27	6100.39	7694.13	10210.5	8459.22	9689.8	7296.9	12359.4	x	x	x	x	HMDB0126383	2-(hydroxymethyl)-2-methyl-2H-chromen-5-ol	M+NH4	C11H12O3	41.1	11	-0.317629	94.9548	http://nonlinear.com/redirect/outbound?p=hmdb&param=HMDB0126383	0.0378295	1.23303
	2.80_1172.9356m/z		1172.94	1	2.80435	0.121567	1	0.656122	1.17837	JEV	Ctrl	100 - 90.8 - 69.7	115102	9.31	97393.8	105386	89562.6	87897.9	108153	115508	102042	102417	126691	128851	145483	93782.9	90751.2	87491.9	103507	136303	100696	106652	103927	218383	x	x	x	x	CSID154046	cilengitide	M+Na	C27H40N8O7	43.5	71.3	6.12485	53.3086	http://nonlinear.com/redirect/outbound?p=chemspider&param=154046	0.0370131	4.46484
	2.80_1173.4387m/z		1173.44	1	2.80435	0.135833	2	0.656122	1.11305	JEV	Ctrl	81.1 - 100	17247.2	7.23	14309.8	17368.7	14989.5	15402.2	15407.1	17759.6	15664.3	16334.2	17665.9	18812.1	21375.4	15456.4	15188.4	15331.1	14745.1	20957	15457.8	17009.6	14491.7	31883.8	x	x	x	x	CSID8000665	Sergliflozin etabonate	M+NH4	C23H28O9	34.3	20.4	-0.412861	51.8264	http://nonlinear.com/redirect/outbound?p=chemspider&param=8000665	0.0470161	1.38808
	2.82_308.2308m/z		308.231	1	2.81863	0.0787333	4	0.656122	1.12438	Ctrl	JEV	100 - 60.2	16950.6	5.97	17077	18477.4	15572.9	15685.6	17940.1	15376.4	16511.8	14339.2	14729.6	14420.7	25508.9	16443	15779.5	15613.1	17169.3	18144.7	16294.1	14932.1	12083	24440.9	x	x	x	x	CSID10128325	(R)-5-Deoxyindenestrol	M+H	C18H18O	38.2	19.2	1.48996	73.7212	http://nonlinear.com/redirect/outbound?p=chemspider&param=10128325	0.0278463	1.4902
	2.88_235.1476m/z		235.148	1	2.88308	0.121567	12	0.656122	1.18018	Ctrl	JEV	100 - 41.7	8765.81	4.44	10060.1	9302.32	8321.66	7690.78	8454.18	7526.91	7132.22	7456.22	7108.79	7913.44	15027.4	8278.12	8432.1	7655.26	8090.95	8882.05	7038.18	7764.53	5831.49	13412.1	x	x	x	x	CSID8261320	simeconazole	M+Na	C14H20FN3OSi	37	14.9	-10.9635	82.1171	http://nonlinear.com/redirect/outbound?p=chemspider&param=8261320	0.0126151	1.30482
	2.88_611.2948m/z		611.295	1	2.88308	0.948317	3	0.656122	1.21413	Ctrl	JEV	100 - 35.9 - 35.9 - 6.67 - 0.309	9694.64	11.57	8919.36	10855.9	11170.3	9354.18	8173.43	8995.08	8362.09	6521.61	8251.73	7793.83	13323.4	9660.63	11318.6	9310.97	7822.27	10614.5	8251.84	6791.28	6769.07	13209.4	x	x	x	x	CSID143690	CBS 113A	M+Na	C10H10ClN2OS	35.1	0	-7.83903	84.2189	http://nonlinear.com/redirect/outbound?p=chemspider&param=143690	0.0430638	1.38893
	2.89_814.3764m/z		814.376	1	2.89023	0.1501	2	0.656122	1.22442	Ctrl	JEV	100 - 13.8	4626.29	10.61	5354.92	4508.38	4652.79	3979.26	4636.11	3824.02	3473.4	4047.52	3183.37	4363.45	7998.96	4012	4714.54	3960.88	4436.92	4512.49	3427.6	4214.88	2611.38	7395.4	x	x	x	x	HMDB0039782	2-(1-Pentenyl)furan	2M+H	C9H12O	40	7.3	-2.96647	96.0655	http://nonlinear.com/redirect/outbound?p=hmdb&param=HMDB0039782	0.023319	1.01773
	2.95_248.1619m/z		248.162	1	2.95447	0.0999333	26	0.656122	1.24235	Ctrl	JEV	100 - 38.2	4862.28	9.67	5007.88	5485.31	4222.17	4463.98	5132.06	3589.45	4477.12	4022.03	3542.21	3938.09	7480.57	4881.37	4278.2	4443.36	4911.57	4235.7	4418.09	4188.34	2905.75	6674.48	x	x	x	x	HMDB0000740	Lactulose	M+NH4	C12H22O11	37.6	8.63	-0.866739	80.2356	http://nonlinear.com/redirect/outbound?p=hmdb&param=HMDB0000740	0.00960945	1.11982
	2.97_256.1334m/z		256.133	1	2.96875	0.192017	23	0.656122	1.24717	Ctrl	JEV	100 - 60.2 - 45.4	21227.6	10.28	28173.4	20363	17799.9	18880.2	20921.6	17685.4	17287.4	16068.5	14704.8	19357.2	42084.3	18121	18036.1	18793	20022.8	20869.5	17059.5	16732.9	12062.6	32807.6	x	x	x	x	HMDB0029742	3-Isopropyl-2-methoxy-5-methylpyrazine	M+H, 2M+H	C9H14N2O	29.9	0.653	-4.5912	54.1684	http://nonlinear.com/redirect/outbound?p=hmdb&param=HMDB0029742	0.0499879	2.09291
	3.00_316.1220m/z		316.122	1	3.00443	0.0778167	38	0.656122	1.27014	Ctrl	JEV	100 - 17.7 - 0.0356	17620.5	14.68	21787.6	17527.4	17463.1	14745.5	16578.8	13930.8	10555.3	14457.1	12789.7	17631.1	32545.3	15597.6	17694.9	14677.3	15866.5	16438.9	10416.1	15054.9	10491.7	29882	x	x	x	x	HMDB0030964	Linolenelaidic acid	M+H	C18H30O2	38.7	0	-2.42064	96.2013	http://nonlinear.com/redirect/outbound?p=hmdb&param=HMDB0030964	0.0477743	2.0236
	3.00_576.7793m/z		576.779	1	3.00443	0.171533	1	0.656122	1.27112	Ctrl	JEV	77.7 - 100	5466.99	9.93	6363.49	5214.12	5150.87	5021.99	5584.49	5031.28	4070.1	3751.4	3878.36	4773.41	9505.52	4640.04	5219.23	4998.79	5344.55	5937.12	4016.43	3906.52	3181.5	8090.22	x	x	x	x	HMDB0038995	(S)-17-Hydroxy-9,11,13,15-octadecatetraynoic acid	M+H	C18H20O3	32	17	-4.40428	48.1094	http://nonlinear.com/redirect/outbound?p=hmdb&param=HMDB0038995	0.00981125	1.24078
	3.03_555.2621m/z		555.262	1	3.02585	0.199167	2	0.656122	1.28008	Ctrl	JEV	100 - 32.5	10378.8	11.05	12104.1	10565.5	9210.41	9454.48	10559.2	8897.56	9013.03	8671.08	7117.79	6840.05	18080.6	9402.26	9332.65	9410.82	10105.5	10499.5	8894.19	9029.63	5838.87	11592.9	x	x	x	x	CSID207502	6-(1,2,3,4-Tetrahydro-6-hydroxy-2-naphthyl)-2(1H)-pyridone	M+Na	C15H15NO2	39.1	23.1	14.0909	86.9728	http://nonlinear.com/redirect/outbound?p=chemspider&param=207502	0.0116237	1.72679
	3.05_139.0659n	139.066	162.055	1	3.0537	0.17775	5	0.656122	1.2875	Ctrl	JEV	100 - 38.2	11527.7	12.42	13993.3	11166	10401	10688	11390.1	9942.49	8427.08	7754.49	7555.07	11088.7	20902.7	9936.64	10539	10638.6	10900.7	11732.5	8315.97	8075.13	6197.58	18793.7	x	x	x	x	HMDB0014692	Pentostatin	M+NH4	C11H16N4O4	39.2	29	-13.6894	81.1998	http://nonlinear.com/redirect/outbound?p=hmdb&param=HMDB0014692	0.0215124	1.76583
	3.05_144.0442m/z		144.044	1	3.0537	0.0920833	16	0.656122	1.30449	Ctrl	JEV	100 - 13.8	8550.86	9.85	9045.54	9345.06	8958.92	7279.73	8125.03	6493.15	4742.42	7374.86	6581.86	7582.44	13511.8	8316.15	9077.82	7246.11	7775.94	7662.18	4679.89	7679.81	5399.24	12851.1	x	x	x	x	HMDB0061708	13-HODE	M+H	C18H32O3	37.6	0	-3.88819	92.7272	http://nonlinear.com/redirect/outbound?p=hmdb&param=HMDB0061708	0.0201624	1.60898
	3.05_162.1817m/z		162.182	1	3.0537	0.0564	6	0.656122	1.30692	Ctrl	JEV	100 - 19.5	6995.7	11.56	8007.1	7404.61	7218.94	6288.12	6059.72	5598.87	3853.4	5634.05	4837.88	6839.83	11960.7	6589.35	7314.74	6259.07	5799.37	6606.89	3802.59	5867.01	3968.61	11592.5	x	x	x	x	CSID30790922	3-[(2E)-3,7-Dimethyl-2,6-octadien-1-yl]-5-methoxy-2-methyl-1,4-benzenediol	M+H	C18H26O3	40.9	7.9	-0.762453	97.4339	http://nonlinear.com/redirect/outbound?p=chemspider&param=30790922	0.0326724	1.40097
	3.06_504.7675m/z		504.767	1	3.06083	0.0992333	1	0.656122	1.3296	Ctrl	JEV	100 - 18.1	13403.6	11.06	16376.3	13492.1	9030.47	12719.6	15399.3	10696.2	10337.4	11468.6	8799.78	9102.26	24462.2	12006.6	9150.31	12660.9	14737.7	12621.9	10201.1	11942.9	7218.64	15427	x	x	x	x	HMDB0036803	6-O-Acetylaustroinulin	M+Na	C22H36O4	49.8	63.1	5.38827	91.9165	http://nonlinear.com/redirect/outbound?p=hmdb&param=HMDB0036803	0.0475289	1.93817
	3.07_232.1887m/z		232.189	1	3.06798	0.0706667	3	0.656122	1.35285	Ctrl	JEV	100	3296.88	9.64	3673.12	3567.31	3264.15	2980.01	2999.79	2587.47	1758.04	2489.31	2476.86	2873.26	5486.76	3174.54	3307.47	2966.25	2870.91	3053.31	1734.86	2592.24	2031.82	4869.74	x	x	x	x	HMDB0040285	Anapear	2M+H	C9H14O2	37.8	0.603	-1.43148	90.2309	http://nonlinear.com/redirect/outbound?p=hmdb&param=HMDB0040285	0.0102954	1.08841
	3.08_194.1171m/z		194.117	1	3.08225	0.113517	48	0.656122	1.36001	Ctrl	JEV	100 - 24.9	29777.6	13.45	32588.4	30155.5	19631.8	31600.5	34911.9	23911.9	22981.7	24805.6	20086.2	17690.1	48679.1	26835.4	19892.3	31454.6	33411.9	28217	22678.7	25831.3	16477.2	29982.1	x	x	x	x	HMDB0038152	Lucidone C	M+H	C24H36O5	43.1	21	-0.496686	94.9851	http://nonlinear.com/redirect/outbound?p=hmdb&param=HMDB0038152	0.0386715	3.06144
	3.10_250.1724m/z		250.172	1	3.09653	0.0992333	7	0.656122	1.36641	Ctrl	JEV	100 - 64.5 - 83.6	13112.7	10.91	15343.3	12574.5	11605.3	12458.4	13581.9	9811.19	10798.2	9878.77	7674.37	9819.93	22919.2	11190.1	11759.3	12400.9	12998.3	11577.6	10655.8	10287.3	6295.44	16643.3	x	x	x	x	HMDB0015239	Methyprylon	M+Na	C10H17NO2	32.5	19.3	-1.83549	45.3262	http://nonlinear.com/redirect/outbound?p=hmdb&param=HMDB0015239	0.00291572	2.25589
	3.10_266.1832m/z		266.183	1	3.09653	0.0713667	7	0.656122	1.37533	Ctrl	JEV	100 - 63	4046.32	14.99	4821.53	3939.75	3284.22	3699.49	4486.58	2835.46	3386.9	2809.26	2324.65	3354.08	7202.21	3505.98	3327.81	3682.41	4293.82	3345.96	3342.24	2925.42	1906.96	5684.66	x	x	x	x	HMDB0015505	Glutethimide	M+NH4	C13H15NO2	33.8	15.6	15.9763	69.6874	http://nonlinear.com/redirect/outbound?p=hmdb&param=HMDB0015505	0.011172	1.20345
	3.20_570.1973m/z		570.197	1	3.19647	0.0499667	3	0.656122	1.37761	Ctrl	JEV	100 - 70.4 - 22.8	32214.2	6.42	47044.2	29987.7	26227.9	28060.3	29751.1	24906.5	23098.5	21368.3	22716.2	24831.6	70272.6	26686	26576	27930.7	28472.9	29390.7	22793.9	22251.8	18634.6	42085.9	x	x	x	x	HMDB0034983	Cynaratriol	M+H	C15H22O5	34.1	25.2	15.9336	61.5278	http://nonlinear.com/redirect/outbound?p=hmdb&param=HMDB0034983	0.0237354	3.11154
	3.24_276.2156m/z		276.216	1	3.23928	0.0785167	7	0.656122	1.3959	Ctrl	JEV	100 - 99.5 - 41.4	2892.28	12.8	2730.16	3417.03	3056.27	2830.51	2427.44	2287.89	2405.91	1325.28	2519.88	1820.96	4078.2	3040.81	3096.83	2817.44	2323.15	2699.8	2374.18	1380.08	2067.11	3086.26	x	x	x	x	HMDB0038230	Bn-NCC-2	M+H, M+Na	C40H48N4O13	32.7	0	-1.15501	65.023	http://nonlinear.com/redirect/outbound?p=hmdb&param=HMDB0038230	0.0280532	1.01498
	3.25_257.1377m/z		257.138	1	3.24643	0.107233	25	0.656122	1.40125	Ctrl	JEV	100 - 6.48	6672.52	22.51	9401.09	6613.92	5129.96	5810.93	6406.7	4439.57	5229.06	4171.38	3601.79	6367.43	14043	5885.71	5198.04	5784.09	6131.43	5238.87	5160.11	4343.87	2954.62	10791.8	x	x	x	x	HMDB0060962	3-hydroxyropivacaine	M+NH4	C17H26N2O2	37.6	9.77	-8.42531	87.3626	http://nonlinear.com/redirect/outbound?p=hmdb&param=HMDB0060962	0.0445201	1.42436
	3.29_506.1513m/z		506.151	1	3.28925	0.03585	1	0.656122	1.40178	Ctrl	JEV	67 - 100	2864.62	14	2760.07	2665.15	3591.75	2721.8	2584.3	1973.1	2488.1	2137.05	1750.93	1868.57	4122.89	2371.71	3639.42	2709.23	2473.27	2328.33	2455.3	2225.42	1436.32	3166.95	x	x	x	x	HMDB0001324	N'-Hydroxymethylnorcotinine	M+H	C10H12N2O2	30.7	22.9	7.84514	39.1614	http://nonlinear.com/redirect/outbound?p=hmdb&param=HMDB0001324	0.0040784	1.06169
	3.30_432.7548m/z		432.755	1	3.3037	0.12865	1	0.656122	1.40993	Ctrl	JEV	100 - 23.8 - 27.6	38704.1	15.38	49767.4	31658.4	26472.7	45416.5	40205.3	27481.3	33586.4	27131.3	27398.8	21657.2	74340.4	28172.8	26824	45206.7	38477.9	32429	33143.6	28253.2	22475.8	36705.7	x	x	x	x	CSID205890	3-ethyl-5?-androstane-3?,17?-diol	M+Na	C21H36O2	49.5	69.7	4.78577	83.1875	http://nonlinear.com/redirect/outbound?p=chemspider&param=205890	0.0425431	3.55328
	3.37_138.1071n	138.107	277.186	1	3.36793	0.08565	16	0.656122	1.41566	Ctrl	JEV	100 - 8.85	15141.5	21.71	13803.6	16356.5	13393.2	11886	20268.2	9150.01	11195.8	15874.5	9559.37	7698.9	20619.2	14555.6	13570.9	11831.1	19397.4	10797.4	11048.1	16530.9	7841.75	13048.5	x	x	x	x	HMDB0004988	Pi-Methylimidazoleacetic acid	M+H	C6H8N2O2	43.2	20	1.57968	98.0693	http://nonlinear.com/redirect/outbound?p=hmdb&param=HMDB0004988	0.0461872	2.17086
	3.37_179.1064m/z		179.106	1	3.36793	0.0927833	106	0.656122	1.42604	Ctrl	JEV	100 - 95.8	13538.5	14.89	19252.5	13380.6	9937.46	11329	13792.9	10499.8	8375.58	8148.05	11417	9028.55	28758.6	11907.3	10069.3	11276.6	13200.3	12390.2	8265.15	8484.97	9365.56	15302.1	x	x	x	x	HMDB0135580	4-(3-phenylpropyl)phenol	M+H	C15H16O	32.5	9.51	5.42692	59.0156	http://nonlinear.com/redirect/outbound?p=hmdb&param=HMDB0135580	0.0308997	2.12113
	3.43_248.1635m/z		248.164	1	3.43218	0.192883	26	0.656122	1.43163	Ctrl	JEV	100 - 55.5	3895.7	16.42	4863.03	4048.8	3489.53	3179.36	3897.78	3082.29	3135.54	2736.64	1512.7	3138.67	7264.2	3603.02	3535.84	3164.67	3730.31	3637.23	3094.2	2849.8	1240.9	5319.57	x	x	x	x	CSID1098	Thiamine	M+NH4	C12H17N4OS+	39.2	26.3	-1.29495	71.2434	http://nonlinear.com/redirect/outbound?p=chemspider&param=1098	0.0415242	1.19493
	3.52_128.0496m/z		128.05	1	3.52498	0.106367	18	0.656122	1.45226	Ctrl	JEV	100 - 11.5	10050.5	22.54	9640.06	10262.6	13779.1	8592.83	7977.8	9002.68	8184.72	4789.19	5629.53	6996.79	14399.9	9132.63	13962	8553.14	7635.04	10623.5	8076.8	4987.22	4618.02	11858.5	x	x	x	x	HMDB0039790	Tetrahydro-2-methyl-3-thiophenethiol	M+H, M+NH4	C5H10S2	38.6	5.35	0.21974	88.0817	http://nonlinear.com/redirect/outbound?p=hmdb&param=HMDB0039790	0.0346681	1.88511
	3.52_146.0601m/z		146.06	1	3.52498	0.17775	25	0.656122	1.46794	Ctrl	JEV	100 - 43.6	2669.31	15.52	3584.95	2539.96	1755.96	2593.36	2872.34	1888.2	2046.82	1767.34	1356.99	2032.67	5355.05	2260.31	1779.26	2581.38	2748.93	2228.15	2019.83	1840.42	1113.17	3445.08	x	x	x	x	CSID202582	2?-methyl-19-nortestosterone	M+NH4	C19H28O2	39.6	17.1	-1.32239	82.6381	http://nonlinear.com/redirect/outbound?p=chemspider&param=202582	0.0283427	1.0051
	3.52_250.1777m/z		250.178	1	3.51783	0.199867	58	0.656122	1.46951	Ctrl	JEV	91.9 - 100	3948.26	14.62	5530.26	3315.04	3378.27	3205.99	4311.76	3380.58	2405.43	2563.39	2545.09	2539.46	8260.87	2950.05	3423.11	3191.18	4126.51	3989.22	2373.71	2669.38	2087.79	4304.01	x	x	x	x	HMDB0015095	Pindolol	M+NH4	C14H20N2O2	28.1	0	-12.437	53.5744	http://nonlinear.com/redirect/outbound?p=hmdb&param=HMDB0015095	0.0153118	1.22332
	3.62_231.1376m/z		231.138	1	3.61707	0.128483	51	0.656122	1.47682	Ctrl	JEV	100 - 88.3	18777.3	15.41	24759	17324.4	16278.3	16374.6	19150.3	13995.6	13759.4	11408.2	14485.1	9925.49	36984	15416.9	16494.3	16299	18327.5	16515.3	13578	11879.9	11882.4	16822.2	x	x	x	x	HMDB0041901	Hexamethylene bisacetamide	M+Na	C10H20N2O2	32.9	7.17	1.37016	59.0619	http://nonlinear.com/redirect/outbound?p=hmdb&param=HMDB0041901	0.00661475	2.83527
	3.62_249.1494m/z		249.149	1	3.61707	0.0928	64	0.656122	1.50502	Ctrl	JEV	100 - 16.7	5904.14	19.25	5788.32	6299.07	3795.18	6025.7	7612.42	4100.43	4804.95	4400.46	3330.93	2978.07	8646.36	5605.53	3845.54	5997.87	7285.36	4838.68	4741.6	4582.42	2732.43	5047.38	x	x	x	x	HMDB0035580	1-Phenyl-1,3-pentadecanedione	M+NH4	C21H32O2	38.9	4.01	-1.62909	92.3391	http://nonlinear.com/redirect/outbound?p=hmdb&param=HMDB0035580	0.0246853	1.55858
	3.62_331.1194m/z		331.119	1	3.6242	0.0785167	38	0.656122	1.57817	Ctrl	JEV	100 - 18.4	8860.26	24.28	13117.4	7930.07	6002.67	6696.62	10554.5	5052.32	6536.6	7487.2	4862.51	4132.63	19594.2	7056.95	6082.33	6665.69	10101.1	5961.94	6450.41	7796.8	3988.82	7004.2	x	x	x	x	HMDB0039865	5-(10-Nonadecenyl)-1,3-benzenediol	M+Na	C25H42O2	38.4	5.13	2.39824	89.6227	http://nonlinear.com/redirect/outbound?p=hmdb&param=HMDB0039865	0.04127	1.86882
	3.64_245.1851m/z		245.185	1	3.63848	0.0928	94	0.656122	1.57934	Ctrl	JEV	100 - 22.8	5548.34	19.13	4781.78	6825.11	6441.94	4343.95	5348.95	3882.79	5052.35	3012.32	2117.69	3500.21	7142.82	6073.66	6527.44	4323.88	5119.13	4581.85	4985.74	3136.88	1737.18	5932.33	x	x	x	x	HMDB0033662	(S)-5'-Deoxy-5'-(methylsulfinyl)adenosine	M+NH4	C11H15N5O4S	38.8	10.1	3.51711	88.2745	http://nonlinear.com/redirect/outbound?p=hmdb&param=HMDB0033662	0.0205415	1.60271
	3.67_277.1837m/z		277.184	1	3.67417	0.150117	26	0.656122	1.62246	Ctrl	JEV	100 - 13 - 1.99	126408	14.65	133326	141019	127545	94434	135717	89142.7	61226.7	113673	84157.3	41357	199157	125493	129238	93997.8	129886	105192	60419.4	118373	69036	70093.9	x	x	x	x	HMDB0000157	Hypoxanthine	M+H, M+Na	C5H4N4O	40.8	13.1	1.81269	93.3532	http://nonlinear.com/redirect/outbound?p=hmdb&param=HMDB0000157	0.0228261	7.97095
	3.67_283.1452m/z		283.145	1	3.67417	0.107283	16	0.656122	1.62823	Ctrl	JEV	100 - 14.9	10328.7	18.34	17491.2	9480.14	7926.6	8804.97	7940.65	6780	5321.42	5751.29	5680.3	8184.58	26127.6	8436.36	8031.8	8764.31	7599.49	8000.67	5251.26	5989.1	4659.67	13871.7	x	x	x	x	HMDB0036832	Sterebin D	M+H	C18H30O3	40	9.15	-2.54937	93.6676	http://nonlinear.com/redirect/outbound?p=hmdb&param=HMDB0036832	0.0271836	2.03373
	3.70_145.0281m/z		145.028	1	3.69558	0.114433	11	0.656122	1.62901	Ctrl	JEV	98.2 - 100	3898.83	20.7	6355.22	3360.18	2937.61	3200.92	3640.23	2324.54	2281.16	2359.69	1815.07	3186.4	9493.17	2990.22	2976.59	3186.14	3483.83	2743.05	2251.09	2457.26	1488.94	5400.48	x	x	x	x	HMDB0029065	Threoninyl-Leucine	M+NH4	C10H20N2O4	31.7	20	-15.9117	54.6467	http://nonlinear.com/redirect/outbound?p=hmdb&param=HMDB0029065	0.0223356	1.27884
	3.70_177.0545m/z		177.055	1	3.69558	0.185983	41	0.656122	1.63708	Ctrl	JEV	100 - 35.8 - 17.7	56186.9	18.24	84453.3	43543.7	48475.1	52024.6	52437.6	37640.8	27998.8	30604.7	31790.3	43572.5	126153	38749.4	49118.5	51784.3	50184.7	44417.6	27629.7	31870.2	26078.3	73848.9	x	x	x	x	HMDB0139525	N-(4-aminobutyl)-3-(4-hydroxyphenyl)propanimidic acid	M+H, M+NH4	C13H20N2O2	37.3	13.5	-2.55957	75.8695	http://nonlinear.com/redirect/outbound?p=hmdb&param=HMDB0139525	0.0087877	5.17296
	3.70_186.0548m/z		186.055	1	3.69558	0.0858667	14	0.656122	1.64124	Ctrl	JEV	100 - 13.3 - 0.523	17447.1	12.78	16994.4	18622.6	20007	14023.1	17588.5	14564.9	6833.56	14104.5	11963.7	5685.63	25385.6	16572.2	20272.6	13958.3	16832.8	17187.2	6743.46	14687.7	9814.06	9636.31	x	x	x	x	HMDB0000157	Hypoxanthine	M+H	C5H4N4O	50.8	60.2	0.546606	94.3598	http://nonlinear.com/redirect/outbound?p=hmdb&param=HMDB0000157	0.025079	2.98638
	3.70_195.0647m/z		195.065	1	3.69558	0.107283	44	0.656122	1.66201	Ctrl	JEV	100	2001.03	19.29	1335.67	2194.77	2244.23	1991.27	2239.21	1301.94	1661.17	1472.52	623.743	960.522	1995.17	1953.12	2274.01	1982.08	2143.01	1536.34	1639.27	1533.41	511.669	1627.94	x	x	x	x	HMDB0040800	2-Ethoxy-5-(1-propenyl)phenol	M+H	C11H14O2	38.7	7	-1.44959	88.3257	http://nonlinear.com/redirect/outbound?p=hmdb&param=HMDB0040800	0.0266987	1.01411
	3.75_232.1448n	232.145	250.179	1	3.75292	0.0930167	49	0.656122	1.66747	Ctrl	JEV	100 - 22.3 - 11.7 - 1.09	7808.08	30.02	10836.5	7534.42	4363.52	7593.62	8712.32	7371.7	2991	5733.82	4093.73	3222.74	16187.1	6704.87	4421.43	7558.54	8338	8698.9	2951.56	5970.91	3358.18	5462.06	x	x	x	x	HMDB0033872	3-Pentadecylphenol	M+Na	C21H36O	37.7	1.52	4.42701	92.1005	http://nonlinear.com/redirect/outbound?p=hmdb&param=HMDB0033872	0.0486164	1.85935
	3.85_250.1749m/z		250.175	1	3.85302	0.07155	8	0.656122	1.67656	Ctrl	JEV	100 - 26.1	15999.5	21.38	24066.4	13126.1	13058.9	13929.1	15816.9	9975.26	9108.34	9251.32	6848.3	12532.1	35949.4	11680.9	13232.2	13864.8	15137.3	11771.2	8988.25	9633.86	5617.8	21240	x	x	x	x	HMDB0033430	Tanakine	M+NH4	C13H17NO2	37.9	11.9	-11.5276	89.9016	http://nonlinear.com/redirect/outbound?p=hmdb&param=HMDB0033430	0.00967313	2.81853
	3.87_696.8529m/z		696.853	1	3.8673	0.0858333	1	0.656122	1.67992	Ctrl	JEV	100 - 85.2 - 30.9	2773.13	25.01	2638.8	2429.66	2492.76	3995.34	2309.09	1416.22	2987.02	1815.13	1198.63	836.758	3941.74	2162.15	2525.84	3976.89	2209.88	1671.19	2947.64	1890.18	983.258	1418.18	x	x	x	x	HMDB0029445	L-Agaridoxin	M+NH4	C11H14N2O5	31	21.3	19.4817	53.0836	http://nonlinear.com/redirect/outbound?p=hmdb&param=HMDB0029445	0.0360104	1.11204
	3.95_852.4152m/z		852.415	1	3.95313	0.206317	1	0.656122	1.71523	Ctrl	JEV	100 - 17.5	2370.5	21	2527.68	2372.44	3114.64	1968.88	1868.84	1837.23	1425.98	900.903	1766.5	979.537	3775.75	2111.23	3155.97	1959.78	1788.55	2168	1407.18	938.155	1449.09	1660.17	x	x	x	x	HMDB0035131	Heliannuol C	M+H	C15H20O3	43.3	20.8	1.53752	97.5291	http://nonlinear.com/redirect/outbound?p=hmdb&param=HMDB0035131	0.0116821	1.14462
	4.02_284.1668m/z		284.167	1	4.01737	0.0785167	23	0.656122	1.71697	Ctrl	JEV	100 - 28.9 - 7.17 - 0.253	3262.76	19.95	4376.16	3014.57	2897.8	2752.43	3272.86	2063.02	2561.34	1926.92	821.096	2129.13	6536.93	2682.66	2936.26	2739.71	3132.25	2434.45	2527.57	2006.59	673.562	3608.56	x	x	x	x	HMDB0040981	(7b,10a)-3-Hydroxy-1,3,5-cadinatrien-9-one	M+NH4, M+Na	C15H20O2	41.4	27.8	-6.78269	86.8106	http://nonlinear.com/redirect/outbound?p=hmdb&param=HMDB0040981	0.0249024	1.34102
	4.17_1033.4837m/z		1033.48	1	4.16657	1.4907	1	0.656122	1.72341	Ctrl	JEV	100 - 11	2208.31	21.01	1702.35	2439.56	2890.49	1965.28	2043.88	1194.73	1744.11	1712.48	1079.39	676.105	2542.9	2170.96	2928.85	1956.21	1956.07	1409.83	1721.12	1783.29	885.443	1145.9	x	x	x	x	HMDB0033044	1-(Methylthio)propyl propyl disulfide	M+H, M+Na	C7H16S3	33.2	0	21.6088	86.6943	http://nonlinear.com/redirect/outbound?p=hmdb&param=HMDB0033044	0.0179721	1.09786
	4.23_118.0649m/z		118.065	1	4.23082	0.13585	11	0.656122	1.72421	Ctrl	JEV	100 - 41.6	4477.04	26.6	3884.2	4187.52	4076.07	6577.04	3660.38	2798.39	4414.88	2356.43	2163.29	1249.89	5802.05	3726.47	4130.17	6546.67	3503.12	3302.22	4356.67	2453.87	1774.59	2118.37	x	x	x	x	HMDB0035022	Prulaurasin	2M+H	C14H17NO6	36.2	3.19	-2.02027	80.3353	http://nonlinear.com/redirect/outbound?p=hmdb&param=HMDB0035022	0.0303794	1.47421
	4.23_146.0598m/z		146.06	1	4.23082	0.150117	25	0.656122	1.73602	Ctrl	JEV	100 - 7.87 - 20.7 - 15.1	4275.09	20.28	5482.87	4282.09	4266.67	4312.36	3031.46	2408.26	3025.99	1614	3535.04	1729.63	8190.09	3810.63	4323.3	4292.44	2901.21	2841.84	2986.09	1680.73	2899.87	2931.47	x	x	x	x	HMDB0000898	1-Methylhistamine	2M+H	C6H11N3	34.4	0	-2.50817	75.1701	http://nonlinear.com/redirect/outbound?p=hmdb&param=HMDB0000898	0.0120231	1.55334
	4.28_279.2060m/z		279.206	1	4.28078	0.157267	20	0.656122	1.73643	Ctrl	JEV	100 - 22.6 - 7.92	3332.26	32.42	5165.29	2470.65	2760.88	2849.2	3415.29	2163.66	1446.52	1484.12	1534.88	2965.95	7715.69	2198.62	2797.52	2836.04	3268.55	2553.21	1427.45	1545.49	1259.1	5026.84	x	x	x	x	HMDB0028953	Lysyl-Histidine	M+H	C12H21N5O3	41.5	35.4	-17.2088	89.4036	http://nonlinear.com/redirect/outbound?p=hmdb&param=HMDB0028953	0.0192061	1.27441
	4.28_520.4464m/z		520.446	1	4.28078	0.10015	1	0.656122	1.73901	Ctrl	JEV	100 - 5.45 - 5.35	1934.29	28.9	1888.8	2878	1726.85	1783.84	1393.98	1468.8	1227.18	1118.45	565.544	1181.5	2821.41	2561.13	1749.77	1775.6	1334.09	1733.25	1211	1164.69	463.927	2002.47	x	x	x	x	HMDB0030039	Jasmolone	M+H	C11H16O2	42.6	25.5	-2.71239	90.6651	http://nonlinear.com/redirect/outbound?p=hmdb&param=HMDB0030039	0.0224636	1.00379
	4.44_351.0861m/z		351.086	1	4.43803	0.0785167	38	0.656122	1.74636	Ctrl	JEV	100 - 8.35	3784.63	19.63	4424.67	4041.2	4376.18	3412.02	2669.11	2457.54	2275.41	1557.35	2641.28	1904.2	6609.39	3596.25	4434.26	3396.26	2554.43	2900	2245.41	1621.74	2166.69	3227.34	x	x	x	x	CSID30792014	Soraphen O	M+H	C18H28O4	39.9	11.3	0.013014	88.1481	http://nonlinear.com/redirect/outbound?p=chemspider&param=30792014	0.00324288	1.52543
	4.45_360.1497m/z		360.15	1	4.44518	0.0571	66	0.656122	1.77006	Ctrl	JEV	100 - 30.8	2154.02	12.83	2614.24	1902.2	2006.72	2065.88	2181.07	1258.19	1573.75	1275.15	412.614	1564.91	3905.05	1692.77	2033.35	2056.34	2087.36	1484.71	1553	1327.88	338.476	2652.3	x	x	x	x	HMDB0036092	exo-2-Methyl-3-methylenebicyclo[2.2.1]heptan-2-ol	M+Na, 2M+H	C9H14O	34.9	9.78	18.9421	83.6301	http://nonlinear.com/redirect/outbound?p=hmdb&param=HMDB0036092	0.0321801	1.14285
	4.58_253.1927m/z		253.193	1	4.5801	0.127783	6	0.656122	1.77311	Ctrl	JEV	100 - 29	3883.53	16.1	3710.36	3104.91	4387.04	3571.95	4643.4	2782.9	2929.75	1225.69	1744.36	2268.5	5542.38	2763.06	4445.26	3555.46	4443.9	3283.94	2891.12	1276.37	1430.94	3844.77	x	x	x	x	HMDB0035132	Heliannuol B	M+H	C15H20O3	39	9.93	3.46107	88.9072	http://nonlinear.com/redirect/outbound?p=hmdb&param=HMDB0035132	0.00865185	1.54822
	4.58_329.2081m/z		329.208	1	4.5801	0.291967	29	0.656122	1.77819	Ctrl	JEV	100 - 44.6	2270.07	14.59	2799.44	2372.36	2103.23	1958.96	2116.37	1289.01	1900.5	1483.05	611.199	1099.34	4181.68	2111.16	2131.14	1949.91	2025.44	1521.08	1875.44	1544.38	501.379	1863.23	x	x	x	x	HMDB0013031	O2'-4a-cyclic-tetrahydrobiopterin	M+NH4	C9H13N5O3	39.2	28.9	8.58926	76.6414	http://nonlinear.com/redirect/outbound?p=hmdb&param=HMDB0013031	0.013352	1.17748
	4.86_369.0967m/z		369.097	1	4.85867	0.08565	28	0.656122	1.78208	Ctrl	JEV	100 - 27.5 - 5.03	57317	27.34	74938.8	47139.4	41908.8	73527.4	49070.5	28995.6	51074.3	35758.5	22267.7	22718.4	111940	41949.2	42465	73187.8	46962.2	34215.9	50400.9	37237.1	18266.7	38504.3	x	x	x	x	HMDB0035288	(6b,7b,13R)-6,7-Diacetoxy-8,14-labdadiene-13-ol	M+H	C24H38O5	39.8	1.18	-0.539907	98.4687	http://nonlinear.com/redirect/outbound?p=hmdb&param=HMDB0035288	0.0157781	5.56891
	5.51_1069.5206m/z		1069.52	1	5.50812	0.142067	2	0.656122	1.79167	Ctrl	JEV	88.7 - 100	4501.16	16.74	7161.36	3419.81	3830.01	3576.4	4518.23	2260.66	2245.95	2834.81	2135.76	3084.2	10697.3	3043.28	3880.84	3559.88	4324.11	2667.67	2216.34	2952.02	1752.01	5227.27	x	x	x	x	HMDB0028876	Hydroxyprolyl-Valine	M+NH4	C10H18N2O4	32.9	28.6	13.322	49.8959	http://nonlinear.com/redirect/outbound?p=hmdb&param=HMDB0028876	0.00675886	1.55476
	5.89_306.2424m/z		306.242	1	5.8931	0.114217	22	0.656122	1.82694	Ctrl	JEV	100 - 5.49	2772.01	24.72	2948.14	3138.46	3586.87	2345.19	1841.41	1706.47	1524.39	955.325	2263.98	1136.33	4403.81	2792.91	3634.47	2334.36	1762.3	2013.7	1504.29	994.828	1857.19	1925.91	x	x	x	x	HMDB0034557	8,8-Diethoxy-2,6-dimethyl-2-octanol	M+Na	C14H30O3	36.5	0	-6.20386	89.7745	http://nonlinear.com/redirect/outbound?p=hmdb&param=HMDB0034557	0.0119338	1.28368
	5.93_250.1117m/z		250.112	1	5.92878	0.114217	22	0.656122	1.84239	Ctrl	JEV	100 - 14.1	6102.3	15.56	9468.5	5513.32	3738.78	6521.35	5269.55	3160.21	3690.81	3156.84	3935.98	2616.96	14143.7	4906.29	3788.4	6491.23	5043.15	3729.18	3642.14	3287.38	3228.76	4435.35	x	x	x	x	HMDB0028967	Methionyl-Arginine	M+NH4	C11H23N5O3S	39.4	7.29	-3.16717	93.6105	http://nonlinear.com/redirect/outbound?p=hmdb&param=HMDB0028967	0.00888613	1.85322
	6.20_383.2479m/z		383.248	1	6.19933	0.0858333	6	0.656122	1.8447	Ctrl	JEV	100 - 55.6	1809.47	19.47	1730.24	1488.37	2336.89	1521.41	1970.44	1245.36	1516.41	561.387	461.837	1119.52	2584.56	1324.5	2367.9	1514.38	1885.78	1469.58	1496.42	584.601	378.855	1897.42	x	x	x	x	HMDB0125517	2-(2,6-dihydroxy-3,4-dimethoxycyclohexylidene)acetonitrile	M+NH4	C10H15NO4	39.5	44.1	17.3482	70.969	http://nonlinear.com/redirect/outbound?p=hmdb&param=HMDB0125517	0.0227309	1.03976
	6.21_347.2198m/z		347.22	1	6.2138	0.1715	42	0.656122	1.8454	Ctrl	JEV	100 - 19.5	2509.09	33.58	4066.06	2165.92	2548.32	1563.02	2202.12	1631.14	1524.41	1804.61	1189.98	648.087	6073.71	1927.45	2582.14	1555.8	2107.51	1924.82	1504.31	1879.23	976.166	1098.41	x	x	x	x	HMDB0002173	Solerol	M+NH4	C6H10O4	37	18.8	-23.574	88.5818	http://nonlinear.com/redirect/outbound?p=hmdb&param=HMDB0002173	0.0326098	1.14394
	6.52_279.2312m/z		279.231	1	6.5209	0.313783	22	0.656122	1.94159	Ctrl	JEV	100 - 15 - 0.88	74814	21.77	85071.7	85165	46457.1	76018.7	81357.2	26541.8	33885.3	45034	30369.1	56831	127077	75788.2	47073.7	75667.6	77861.8	31320.3	33438.5	46896.1	24912.4	96320.1	x	x	x	x	CSID3327	Gabaculine	M+Na, 2M+H	C7H9NO2	41.2	30.5	18.2546	93.8793	http://nonlinear.com/redirect/outbound?p=chemspider&param=3327	0.0053834	7.15999
	6.52_297.2413m/z		297.241	1	6.5209	0.228133	17	0.656122	1.9487	Ctrl	JEV	100 - 10.3	1640.66	15.57	1931.48	1824.7	1658.83	1292.61	1495.69	1051.01	1061.44	565.511	918.224	613.444	2885.16	1623.8	1680.85	1286.64	1431.42	1240.24	1047.44	588.895	753.238	1039.7	x	x	x	x	HMDB0036766	Furanogermenone	M+H	C15H20O2	48.3	51.3	-2.65601	93.1873	http://nonlinear.com/redirect/outbound?p=hmdb&param=HMDB0036766	0.00191548	1.10124
	6.54_323.1850m/z		323.185	1	6.53518	0.185067	18	0.656122	1.95097	Ctrl	JEV	100 - 11.2	27142.6	20.05	35432	31467.8	13817.9	29271.2	25724.3	12634.7	12993.7	16396.5	10420.1	17117	52926.9	28003.1	14001.3	29136	24619.1	14909.4	12822.3	17074.5	8547.79	29010.8	x	x	x	x	CSID62357	VC4070000	M+H	C9H7NO	53.7	70	0.0811979	98.4904	http://nonlinear.com/redirect/outbound?p=chemspider&param=62357	0.0096997	4.20087
	6.66_585.3401m/z		585.34	1	6.65607	0.278617	16	0.656122	1.96688	Ctrl	JEV	100 - 27.3	5473.18	34.63	8828.48	3215.43	4673.05	4883.93	5764.98	3090.71	1748.05	2477.42	2317.89	4279.25	13187.6	2861.4	4735.07	4861.38	5517.3	3647.16	1725	2579.86	1901.41	7252.7	x	x	x	x	HMDB0029128	Valyl-Hydroxyproline	M+NH4	C10H18N2O4	41.4	27.5	6.3675	86.805	http://nonlinear.com/redirect/outbound?p=hmdb&param=HMDB0029128	0.0169227	1.78039
	6.77_251.1972m/z		251.197	1	6.77027	0.121333	28	0.656122	1.98924	Ctrl	JEV	98.6 - 100	6782.25	17.98	12457.1	5108.36	4896.94	5555.47	5893.41	3491.59	3495.88	3612.85	2393.21	4053.84	18607.8	4545.92	4961.93	5529.81	5640.2	4120.21	3449.79	3762.24	1963.2	6870.66	x	x	x	x	HMDB0134130	(2Z)-2-[(2-hydroxyphenyl)methylidene]octanal	M+NH4	C15H20O2	34.6	27.4	-10.7631	57.044	http://nonlinear.com/redirect/outbound?p=hmdb&param=HMDB0134130	0.0112971	1.92573
	6.77_309.2060m/z		309.206	1	6.77027	0.107083	28	0.656122	2.0155	Ctrl	JEV	100 - 6.87	2803.35	22.75	3864.81	3232.6	1423.08	2839.45	2656.83	1243.93	1359.94	1614.47	963.662	1772.47	5773.09	2876.68	1441.96	2826.34	2542.68	1467.88	1342.01	1681.23	790.512	3004.08	x	x	x	x	HMDB0031337	Thiiranebutanenitrile	M+H	C6H9NS	38.5	21.8	-25.4236	94.6908	http://nonlinear.com/redirect/outbound?p=hmdb&param=HMDB0031337	0.00992985	1.36496
	6.77_343.2623m/z		343.262	1	6.77027	0.26435	27	0.656122	2.01626	Ctrl	JEV	100 - 19.4	3336.99	36.74	5711.53	2359.85	2635.65	2819.78	3158.14	1789.43	1681.46	1318.62	926.818	2558.88	8531.64	2100.03	2670.62	2806.76	3022.45	2111.6	1659.29	1373.14	760.288	4336.93	x	x	x	x	HMDB0041201	Panaquinquecol 7	M+H	C17H24O3	40.8	21.2	14.0241	97.436	http://nonlinear.com/redirect/outbound?p=hmdb&param=HMDB0041201	0.015394	1.39421
	6.78_269.2072m/z		269.207	1	6.7774	0.164183	1	0.656122	2.032	Ctrl	JEV	100 - 32.8	12652.4	16.84	19345.4	8419.48	12435.4	11532.9	11529.1	7047.91	4974.37	5699.64	5862.57	7548.49	28897.4	7492.48	12600.4	11479.6	11033.7	8316.82	4908.78	5935.32	4809.19	12793.6	x	x	x	x	HMDB0041901	Hexamethylene bisacetamide	M+Na	C10H20N2O2	39.3	18.3	4.45848	83.56	http://nonlinear.com/redirect/outbound?p=hmdb&param=HMDB0041901	0.00212547	2.93488
	6.90_181.1218m/z		181.122	1	6.89875	0.10015	50	0.656122	2.08845	Ctrl	JEV	100 - 31	2511.71	36.65	4047.73	1589.74	2303.36	2144.38	2473.32	1499.81	871.458	1012.1	797.025	1832.92	6046.33	1414.7	2333.93	2134.47	2367.06	1769.84	859.968	1053.95	653.816	3106.52	x	x	x	x	HMDB0029065	Threoninyl-Leucine	M+NH4	C10H20N2O4	39.2	17.5	-5.21401	84.3966	http://nonlinear.com/redirect/outbound?p=hmdb&param=HMDB0029065	0.00993662	1.27088
	7.00_334.2735m/z		334.274	1	6.9989	0.142067	31	0.656122	2.12739	Ctrl	JEV	100 - 31.4 - 3.41	14727.7	31.45	21847.8	8958.2	13618.4	14083.9	15130.2	8124.36	4629.57	6036.52	4709.36	11114.7	32635.4	7971.89	13799.1	14018.9	14480.2	9587.07	4568.53	6286.13	3863.18	18837.7	x	x	x	x	HMDB0034684	Thalictroidine	M+Na	C14H19NO2	39.6	23	11.0804	86.9914	http://nonlinear.com/redirect/outbound?p=hmdb&param=HMDB0034684	0.00784857	3.19467
	7.08_387.2525m/z		387.253	1	7.08385	0.156333	12	0.656122	2.15292	Ctrl	JEV	100 - 27.4	11967.6	26.26	25853.5	9531.85	7332.59	8794.3	8325.82	5952.64	5152.84	4602.88	4196.16	7889.32	38618.8	8482.37	7429.91	8753.68	7968.11	7024.35	5084.9	4793.21	3442.2	13371.2	x	x	x	x	HMDB0060655	3-Hydroxylidocaine	M+H	C14H22N2O2	39.7	17.4	-8.07479	89.9885	http://nonlinear.com/redirect/outbound?p=hmdb&param=HMDB0060655	0.0295608	2.44571
	7.08_405.2633m/z		405.263	1	7.08385	0.156333	16	0.656122	2.19582	Ctrl	JEV	100 - 31.9 - 2.56	6104.29	82.75	2822.31	6774.65	4121.04	14580.5	2222.99	210.445	12500.3	83.5563	223.881	881.642	4215.86	6028.75	4175.74	14513.1	2127.48	248.333	12335.5	87.0114	183.654	1494.25	x	x	x	x	HMDB0126235	2-{2,6-dihydroxy-4-[6-hydroxy-7-(3-methylbut-2-en-1-yl)-1-benzofuran-2-yl]phenyl}-6-(2,4-dihydroxy-5-methoxyphenyl)-4-methylcyclohex-3-ene-1-carboxylic acid	2M+H	C34H34O9	38.8	11.8	-7.79132	90.9394	http://nonlinear.com/redirect/outbound?p=hmdb&param=HMDB0126235	0.046846	1.38714
	7.11_295.2260m/z		295.226	1	7.1124	0.256267	56	0.656122	2.25428	Ctrl	JEV	100 - 16 - 0.132	2712.71	48.32	3314.84	2020.08	4938.57	1980.74	1309.32	1396.86	705.43	2133.52	946.132	834.854	4951.58	1797.66	5004.11	1971.59	1253.07	1648.35	696.129	2221.74	776.132	1414.95	x	x	x	x	HMDB0034186	Morusignin B	M+Na	C18H16O6	37.3	0	6.71516	94.1314	http://nonlinear.com/redirect/outbound?p=hmdb&param=HMDB0034186	0.0319065	1.26292
	7.16_272.1290m/z		272.129	1	7.15523	0.0999333	45	0.656122	2.28143	Ctrl	JEV	100 - 23.4 - 1.99	4334.4	34.99	8943.11	4065.45	3672.2	2270.52	2720.74	2294.49	1148.16	2524.98	2322.84	1208.83	13358.9	3617.84	3720.93	2260.03	2603.84	2707.59	1133.02	2629.39	1905.48	2048.79	x	x	x	x	HMDB0041325	Salfredin B11	M+NH4	C13H12O4	35.8	5.09	18.7663	92.5285	http://nonlinear.com/redirect/outbound?p=hmdb&param=HMDB0041325	0.0322227	1.55505
	7.16_407.2790m/z		407.279	1	7.15523	0.1499	15	0.656122	2.32161	Ctrl	JEV	100 - 9.22	3309.95	43.4	6935.18	2516.23	2388.89	1799.33	2910.12	2202.53	801.862	1851.78	828.202	1444.21	10359.5	2239.19	2420.59	1791.02	2785.09	2599.07	791.29	1928.35	679.391	2447.72	x	x	x	x	CSID9717890	(3S,3aS,3bR,4S,7R,7aR)-4-Isopropyl-3,7-dimethyloctahydro-1H-cyclopenta[1,3]cyclopropa[1,2]benzen-3-ol	M+Na	C15H26O	37.1	5.04	-11.1295	92.5193	http://nonlinear.com/redirect/outbound?p=chemspider&param=9717890	0.0309925	1.36312
	7.16_591.2173m/z		591.217	1	7.15523	0.128483	17	0.656122	2.33029	Ctrl	JEV	100 - 67.9 - 8.28	6785.46	90.51	2647.58	7263.86	4937.62	17120.3	1957.89	0	14138.3	0	64.8441	356.108	3954.84	6464.09	5003.15	17041.3	1873.77	0	13951.9	0	53.193	603.549	x	x	x	x	CSID13134960	Macitentan	2M+H	C19H20Br2N6O4S	23.6	0.73	1.4494	19.1009	http://nonlinear.com/redirect/outbound?p=chemspider&param=13134960	0.0414001	1.48748
	7.23_910.7245m/z		910.724	1	7.23375	0.2572	7	0.656122	2.40249	Ctrl	JEV	100 - 5.52	1928.94	24.85	2303.33	2172.1	1094.92	2020.73	2053.65	420.662	694.487	1088.97	515.445	1294.9	3440.62	1932.95	1109.45	2011.4	1965.41	496.398	685.33	1134	422.83	2194.67	x	x	x	x	HMDB0032431	5-Methyl-2-thiophenecarboxaldehyde	M+NH4	C6H6OS	38.4	24	-28.4375	93.6542	http://nonlinear.com/redirect/outbound?p=hmdb&param=HMDB0032431	0.00612658	1.26979
	7.46_910.7238m/z		910.724	1	7.45525	0.14275	7	0.656122	2.47819	Ctrl	JEV	100 - 21.3	4260.37	26.56	9517.35	2203.84	4098.63	3509.67	1972.34	2165.98	1793.16	2013.65	1635.04	987.898	14216.6	1961.19	4153.03	3493.45	1887.6	2555.95	1769.51	2096.91	1341.25	1674.34	x	x	x	x	HMDB0060822	Doxorubicin-semiquinone	M+Na	C27H33NO11	37.8	7.07	5.04032	87.6699	http://nonlinear.com/redirect/outbound?p=hmdb&param=HMDB0060822	0.0388239	1.54782
	7.52_327.2672m/z		327.267	1	7.5195	0.127783	2	0.656122	2.486	Ctrl	JEV	100 - 9.83	5798.37	36.9	9002.33	6690.68	5464.48	4090.35	3744.01	3083.78	1462.7	3559.25	1480.16	2076.14	13447.3	5954.02	5537	4071.46	3583.15	3638.98	1443.42	3706.43	1214.21	3518.75	x	x	x	x	HMDB0029737	1H-Indole-3-carboxaldehyde	M+H	C9H7NO	47.6	41.1	-1.66004	99.044	http://nonlinear.com/redirect/outbound?p=hmdb&param=HMDB0029737	0.00527334	2.13804
	8.35_397.3086m/z		397.309	1	8.34678	0.1932	10	0.656122	2.57511	Ctrl	JEV	100 - 5.67	3032.18	42.46	5085.18	3442.4	2716.17	2025.16	1891.98	1576.1	735.311	1792.15	663.141	1120.77	7596.03	3063.39	2752.22	2015.8	1810.69	1859.86	725.616	1866.25	543.989	1899.54	x	x	x	x	HMDB0000738	Indole	M+H	C8H7N	47.9	45.2	-1.75744	96.5317	http://nonlinear.com/redirect/outbound?p=hmdb&param=HMDB0000738	0.00749184	1.52649
	8.54_426.2613m/z		426.261	1	8.53952	0.12085	10	0.656122	2.59393	Ctrl	JEV	100 - 54.4	6691.16	52.22	12642.3	3391.55	5469.29	6087.33	5865.35	3065.56	962.734	1518.31	2077.9	5273.22	18884.5	3018.14	5541.88	6059.21	5613.35	3617.49	950.041	1581.09	1704.54	8937.32	x	x	x	x	CSID20049402	Acrifoline	M+NH4	C16H23NO2	36.2	9.07	-2.8405	75.402	http://nonlinear.com/redirect/outbound?p=chemspider&param=20049402	0.0212205	2.13968
	9.26_273.1841m/z		273.184	1	9.26018	0.19315	44	0.656122	2.74327	Ctrl	JEV	100 - 11.9	35356.3	47.86	37946.7	26526.6	73018	23618.7	15671.7	17989.2	9376.25	20256.9	5294.46	11525.1	56683.3	23606	73987	23509.6	14998.4	21228	9252.62	21094.5	4343.16	19533.4	x	x	x	x	HMDB0135530	6-(hydroxymethyl)-2H-chromen-2-one	M+H	C10H8O3	43.4	19.4	-0.45174	98.2243	http://nonlinear.com/redirect/outbound?p=hmdb&param=HMDB0135530	0.0248782	4.85799
	9.26_291.1953m/z		291.195	1	9.26018	0.1289	9	0.656122	2.81098	Ctrl	JEV	100 - 8.29	6443.74	51.06	7797.39	4534.34	13278.4	3989.94	2618.66	3263.8	1455.12	3507.82	766.675	2468.33	11647.4	4035.1	13454.6	3971.51	2506.15	3851.41	1435.93	3652.87	628.92	4183.45	x	x	x	x	HMDB0032918	3-(2-Furanyl)-2-propenal	M+Na	C7H6O2	37.6	6.43	17.3304	98.8647	http://nonlinear.com/redirect/outbound?p=hmdb&param=HMDB0032918	0.0358228	2.0713
	9.26_309.2056m/z		309.206	1	9.26018	0.121767	28	0.656122	2.88139	Ctrl	JEV	100 - 14 - 9.38	2448.88	55.8	4044.12	1422.9	3842.41	1425.87	1509.08	775.702	238.625	1922.45	484.464	828.237	6040.95	1266.24	3893.41	1419.29	1444.24	915.359	235.479	2001.94	397.416	1403.74	x	x	x	x	HMDB0038942	Methyl 2,3-dihydro-3,5-dihydroxy-2-oxo-3-indoleacetic acid	M+Na	C11H11NO5	39.6	7.99	2.13106	92.5735	http://nonlinear.com/redirect/outbound?p=hmdb&param=HMDB0038942	0.0247437	1.33414
	9.43_233.1530m/z		233.153	1	9.4317	0.0999333	113	0.656122	2.91638	Ctrl	JEV	100 - 13	1812.33	40.13	2691.8	988.76	3628.6	1173.86	578.634	670.5	420.274	1035.06	508.706	472.621	4020.9	879.896	3676.76	1168.44	553.773	791.217	414.733	1077.86	417.302	801.023	x	x	x	x	HMDB0034141	12alpha-Hydroxyerosone	M+H	C20H16O7	39.8	10.2	-0.514884	89.4812	http://nonlinear.com/redirect/outbound?p=hmdb&param=HMDB0034141	0.0408413	1.09636
	9.43_249.1489m/z		249.149	1	9.4317	0.0785167	64	0.656122	2.92561	Ctrl	JEV	72.4 - 100 - 13	2603.22	68.65	2188.74	2290.6	5710.52	1508.34	1317.9	2502.56	744.284	819.061	271.384	111.741	3269.44	2038.4	5786.31	1501.38	1261.27	2953.12	734.47	852.93	222.622	189.385	x	x	x	x	CSID140122	tipifarnib	M+NH4	C27H22Cl2N4O	27.4	0	0.811607	37.9585	http://nonlinear.com/redirect/outbound?p=chemspider&param=140122	0.0416535	1.28573
	9.80_669.4062m/z		669.406	1	9.8027	0.477767	4	0.656122	2.96367	Ctrl	JEV	100 - 6.78	3143.61	61.03	2468.33	2647.05	6638.28	2433.3	1531.08	1379.99	982.788	1996.32	460.876	483.605	3687.09	2355.6	6726.38	2422.07	1465.3	1628.44	969.83	2078.86	378.066	819.639	x	x	x	x	HMDB0030765	(-)-trans-3,4-Dihydro-4,8-dihydroxy-3-methyl-1H-2-benzopyran-1-one	M+H	C10H10O4	40.2	9.01	-2.40361	94.862	http://nonlinear.com/redirect/outbound?p=hmdb&param=HMDB0030765	0.0174738	1.49247
	10.00_496.3395m/z		496.34	1	9.99563	0.27055	5	0.656122	3.06476	Ctrl	JEV	100 - 58.7	1499.84	55	2717.4	1874.08	754.168	772.452	1381.1	1015.88	467.374	354.669	254.408	354.578	4059.13	1667.74	764.177	768.884	1321.77	1198.78	461.212	369.334	208.696	600.958	x	x	x	x	HMDB0037848	N-(1-Deoxy-1-fructosyl)glycine	M+Na	C8H15NO7	32.8	9.41	12.7855	68.1301	http://nonlinear.com/redirect/outbound?p=hmdb&param=HMDB0037848	0.0113339	1.08578
	10.42_245.2262m/z		245.226	1	10.4167	0.136033	3	0.656122	3.17348	Ctrl	JEV	100 - 4.72	1845.54	53.67	2415.86	1273.75	3767.68	1067.92	702.466	763.531	354.011	890.447	154.349	745.408	3608.72	1133.51	3817.69	1062.98	672.285	900.997	349.344	927.267	126.616	1263.36	x	x	x	x	HMDB0030406	L-2-Amino-5-(methylthio)pentanoic acid	M+Na	C6H13NO2S	38.9	9.74	-6.84547	92.3114	http://nonlinear.com/redirect/outbound?p=hmdb&param=HMDB0030406	0.0323827	1.15904
	10.42_263.2370m/z		263.237	1	10.4167	0.200283	7	0.656122	3.19767	Ctrl	JEV	100 - 28.6 - 10.6	248070	45.05	611556	183315	113638	163126	168715	67953.4	44992.7	52530.2	90681.5	131734	913517	163132	115147	162372	161467	80187.7	44399.5	54702.3	74387.9	223270	x	x	x	x	HMDB0037719	2-Phenylethyl octanoate	M+Na	C16H24O2	37.4	10.1	-8.09144	85.7916	http://nonlinear.com/redirect/outbound?p=hmdb&param=HMDB0037719	0.0166861	12.6859
	10.42_281.2477m/z		281.248	1	10.4167	0.15745	40	0.656122	3.97262	Ctrl	JEV	100 - 65.8 - 78.1 - 33.2 - 11.5	1110.37	53.11	1780.57	1213.62	1490.18	780.768	286.702	581.019	25.8971	21.7746	174.649	594.184	2659.74	1079.99	1509.96	777.162	274.384	685.626	25.5557	22.675	143.268	1007.05	x	x	x	x	HMDB0037722	C.I. Pigment Yellow 100	M+H	C16H12N4O9S2	31.6	12.9	2.03047	47.3856	http://nonlinear.com/redirect/outbound?p=hmdb&param=HMDB0037722	0.0361473	1.00978
	10.42_298.2505n	298.25	299.258	1	10.4167	0.143167	14	0.656122	4.84502	Ctrl	JEV	100 - 11.4	2686.32	28.11	6731.28	1839.37	1193.56	1719.27	1948.13	409.744	515.707	428.563	634.891	783.344	10054.9	1636.86	1209.4	1711.33	1864.43	483.514	508.908	446.284	520.814	1327.65	x	x	x	x	HMDB0039655	1,2,3,4,5,6-Hexahydro-5-(1-hydroxyethylidene)-7H-cyclopenta[b]pyridin-7-one	M+H	C10H13NO2	44.9	28.5	-2.65402	99.0868	http://nonlinear.com/redirect/outbound?p=hmdb&param=HMDB0039655	0.00229369	1.48167
	10.42_334.1606n	334.161	352.17	1	10.4167	0.21455	4	0.656122	6.13506	Ctrl	JEV	100	1852.25	32.79	2151.08	2199.08	770.102	2066.51	2074.48	21.9439	274.146	643.91	51.2677	518.295	3213.19	1956.96	780.322	2056.96	1985.35	25.8947	270.532	670.536	42.056	878.433	x	x	x	x	HMDB0031153	Diisobutylcarbinol	M+NH4	C9H20O	33.4	0	-24.8712	90.3707	http://nonlinear.com/redirect/outbound?p=hmdb&param=HMDB0031153	0.00895036	1.5369
	10.42_353.1766m/z		353.177	1	10.4167	0.143167	44	0.656122	6.39278	Ctrl	JEV	100 - 6.46	1757.88	79.39	4154.38	1419.05	484.411	1412.37	1319.21	381.785	2.38681	97.8596	333.705	559.162	6205.64	1262.81	490.84	1405.84	1262.53	450.521	2.35534	101.906	273.745	947.697	x	x	x	x	HMDB0059946	2-Hydroxypropyl 2-isopropyl-5-methylcyclohexyl carbonate	M+NH4	C14H26O4	38.7	9.06	-5.08252	90.4294	http://nonlinear.com/redirect/outbound?p=hmdb&param=HMDB0059946	0.0429534	1.2815
	10.42_355.1779m/z		355.178	1	10.4167	0.114617	14	0.656122	8.1555	Ctrl	JEV	100 - 15.3	1322.82	111.47	4069.56	686.415	572.585	686.261	599.268	135.624	61.7694	40.2965	94.1236	479.184	6078.94	610.839	580.184	683.092	573.521	160.041	60.955	41.9628	77.2115	812.146	x	x	x	x	HMDB0012469	(-)-Salsoline	M+H	C11H15NO2	43.2	22.1	-2.1482	96.6637	http://nonlinear.com/redirect/outbound?p=hmdb&param=HMDB0012469	0.00535875	1.0135
[truncated: 1 more columns]

## Sheet: JEV_Brain
															Normalised abundance										Raw abundance
															Ctrl					JEV					Ctrl					JEV					Tags
	Compound	Neutral mass (Da)	m/z	Charge	Retention time (min)	Chromatographic peak width (min)	Identifications	q Value	Max Fold Change	Highest Mean	Lowest Mean	Isotope Distribution	Maximum Abundance	Minimum CV%	Ctrl-1_neg	Ctrl-2_neg	Ctrl-3_neg	Ctrl-4_neg	Ctrl-5_neg	JEV-1_neg	JEV-2_neg	JEV-3_neg	JEV-4_neg	JEV-5_neg	Ctrl-1_neg	Ctrl-2_neg	Ctrl-3_neg	Ctrl-4_neg	Ctrl-5_neg	JEV-1_neg	JEV-2_neg	JEV-3_neg	JEV-4_neg	JEV-5_neg	JEV vs Ctrl VIP>1	Minimum CV <= 30	JEV vs Ctrl Anova p-value <= 0.05	JEV vs Ctrl	Accepted Compound ID	Accepted Description	Adducts	Formula	Score	Fragmentation Score	Mass Error (ppm)	Isotope Similarity	Compound Link	Anova (p)	VIP
neg	1.04_223.0328m/z		223.033	1	1.04378	0.17095	11	1	4.86953	JEV	Ctrl	100 - 9 - 0.481	2202.39	45.13	477.848	530.157	127.189	684.958	441.245	2540.14	1906.34	401.395	2980.36	3183.69	463.54	654.017	192.28	780.888	285.178	2881.46	2238.36	353.947	2934.23	3805.31	x	x	x	x	CSID601842	XF7700000	M+FA-H	C7H6N4S	35.8	2.27	18.297	94.9611	http://nonlinear.com/redirect/outbound?p=chemspider&param=601842	0.0141944	3.8216
	1.27_212.0156m/z		212.016	1	1.2659	0.100283	9	1	3.77837	JEV	Ctrl	100 - 21.1	389.871	63.55	96.3813	90.9116	39.9853	74.9552	213.692	269.687	226.582	117.818	877.569	457.697	93.4954	112.151	60.4483	85.4528	138.109	305.924	266.044	103.89	863.988	547.062	x	x	x	x	CSID13574	Omethoate	M-H	C5H12NO4PS	40.1	18.5	1.80136	84.1901	http://nonlinear.com/redirect/outbound?p=chemspider&param=13574	0.0201586	1.3577
	1.05_185.0182m/z		185.018	1	1.05093	0.1279	7	1	1.8056	JEV	Ctrl	100	300.941	28.46	174.749	208.19	140.93	235.583	73.9032	170.379	369.267	324.712	263.986	376.363	169.517	256.83	213.053	268.577	47.7638	193.273	433.579	286.328	259.9	449.848	x	x	x	x	HMDB0032026	Sinalexin	M-H2O-H	C10H8N2OS	36.7	0.469	1.31142	84.3916	http://nonlinear.com/redirect/outbound?p=hmdb&param=HMDB0032026	0.0378587	1.01266
	0.72_606.0773m/z		606.077	1	0.71575	0.0356833	12	1	1.65039	JEV	Ctrl	100 - 17 - 0.996	1227.01	26.81	872.755	928.342	698.497	802.748	414.984	1298.42	1754.72	1100.64	886.994	1094.25	846.623	1145.23	1055.96	915.174	268.205	1472.89	2060.33	970.533	873.267	1307.9	x	x	x	x	HMDB0000290	Uridine diphosphate-N-acetylglucosamine	M-H	C17H27N3O17P2	38.5	5.1	4.97233	92.9739	http://nonlinear.com/redirect/outbound?p=hmdb&param=HMDB0000290	0.0237992	1.91695
	0.79_185.0183m/z		185.018	1	0.794267	0.114433	7	1	1.51919	JEV	Ctrl	100 - 7.62 - 1.49	11432.5	16.56	7790.96	8489.4	6118.29	8882.48	6345.88	6230.81	13644.8	12425.5	10996.6	13864.8	7557.68	10472.8	9249.41	10126.5	4101.36	7068.02	16021.2	10956.7	10826.4	16571.9	x	x	x	x	HMDB0032026	Sinalexin	M-H2O-H	C10H8N2OS	37.9	0	1.99669	92.0835	http://nonlinear.com/redirect/outbound?p=hmdb&param=HMDB0032026	0.0465214	5.34363
	1.87_565.0490m/z		565.049	1	1.87467	0.27055	11	1	1.45356	JEV	Ctrl	100 - 16.8 - 2.29	1077.43	14.26	868.905	844.882	696.672	785.462	510.253	1015.79	1344.67	1052.31	953.018	1021.35	842.888	1042.27	1053.2	895.467	329.778	1152.28	1578.87	927.921	938.27	1220.77	x	x	x	x	HMDB0000286	Uridine diphosphate glucose	M-H	C15H24N2O17P2	39.6	4.38	2.24202	96.2722	http://nonlinear.com/redirect/outbound?p=hmdb&param=HMDB0000286	0.00963452	1.68607
	0.71_565.0492m/z		565.049	1	0.7086	0.0785167	11	1	1.44052	JEV	Ctrl	100 - 15.3 - 0.897	2056.57	16.68	1595.08	1680.41	1429.32	1475.43	958.032	2205.52	2550.41	2023.35	1657.58	1845.98	1547.32	2073	2160.79	1682.06	619.178	2501.86	2994.6	1784.17	1631.93	2206.4	x	x	x	x	HMDB0000286	Uridine diphosphate glucose	M-H	C15H24N2O17P2	39.5	6.89	2.64801	93.9095	http://nonlinear.com/redirect/outbound?p=hmdb&param=HMDB0000286	0.0168944	2.25234
	0.97_956.1555m/z		956.156	1	0.965967	0.0929833	7	1	1.37572	JEV	Ctrl	100 - 60.9 - 46.1 - 77.8 - 20.4	2387.14	11.6	2216.03	1937.11	1695.26	1797.71	1029.82	2073.62	2561.2	2665.76	2530.33	2104.77	2149.68	2389.68	2562.84	2049.48	665.573	2352.25	3007.26	2350.64	2491.17	2515.72	x	x	x	x	HMDB0062352	3-Hydroxypentanoyl-CoA	M+FA-H	C27H44N7O20P3S	31.9	9.73	-0.148175	49.8765	http://nonlinear.com/redirect/outbound?p=hmdb&param=HMDB0062352	0.0403081	2.22691
	0.97_288.0658m/z		288.066	1	0.973117	0.08565	12	1	1.34717	JEV	Ctrl	100 - 26.8 - 7.71	1168.24	12.73	942.642	922.907	818.187	956.71	695.444	985.766	967.724	1350.38	1436.1	1101.22	914.417	1138.53	1236.91	1090.7	449.467	1118.22	1136.26	1190.75	1413.87	1316.24	x	x	x	x	HMDB0033247	Aristolodione	M-H2O-H	C18H13NO4	38.9	6.67	-2.71977	91.1608	http://nonlinear.com/redirect/outbound?p=hmdb&param=HMDB0033247	0.0199742	1.51247
	0.99_503.0993m/z		503.099	1	0.987383	0.0713833	6	1	1.34678	JEV	Ctrl	100 - 20.6 - 32.1 - 0.835	1131.18	11.36	949.92	772.764	900.842	1024.89	551.154	1065.23	962.712	1268.05	1249.95	1109.96	921.477	953.304	1361.86	1168.42	356.212	1208.36	1130.38	1118.16	1230.61	1326.68	x	x	x	x	CSID4955382	Tianeptine Sodium	M+FA-H	C21H24ClN2NaO4S	35.7	0	-7.03315	86.4254	http://nonlinear.com/redirect/outbound?p=chemspider&param=4955382	0.0318148	1.49903
	0.95_879.1178m/z		879.118	1	0.9517	0.0785167	1	1	1.33042	JEV	Ctrl	100 - 50.5 - 26.3 - 14 - 1.66	1314.91	14.87	1140.58	1106.08	885.399	1074.3	735.363	1129.08	1647.03	1279.1	1241.9	1277.44	1106.43	1364.49	1338.52	1224.76	475.267	1280.79	1933.88	1127.9	1222.68	1526.86	x	x	x	x	CSID5293513	fosbretabulin disodium	2M-H	C18H19Na2O8P	32.2	0	2.91316	64.3841	http://nonlinear.com/redirect/outbound?p=chemspider&param=5293513	0.023611	1.57572
	0.85_855.0020m/z		855.002	1	0.851583	0.1146	1	1	1.19565	JEV	Ctrl	92.3 - 100 - 88.6	1419.31	5.05	1281.17	1327.66	1111.67	1109.43	1105.36	1412.78	1538.4	1383.7	1412.87	1348.78	1242.81	1637.84	1680.59	1264.81	714.397	1602.61	1806.33	1220.14	1391.01	1612.13	x	x	x	x	CSID413136	XM9410000	2M-H	C15H14N2Na2O6S2	26.3	0	-9.90944	42.308	http://nonlinear.com/redirect/outbound?p=chemspider&param=413136	0.00425193	1.43126
	4.62_1131.5482m/z		1131.55	1	4.6151	0.107333	2	1	1.19393	JEV	Ctrl	100 - 30.7	992.481	9.1	925.109	828.741	691.435	935.743	775.326	1033.01	1041.16	1032.35	831.339	1024.55	897.409	1022.36	1045.29	1066.8	501.095	1171.82	1222.49	910.315	818.473	1224.59	x	x	x	x	CSID406603	(4R,5S,6S,7R)-4,7-Dibenzyl-5,6-dihydroxy-1,3-bis[3-(hydroxymethyl)benzyl]-1,3-diazepan-2-one	2M-H	C35H38N2O5	38.3	4.63	-0.609044	87.6202	http://nonlinear.com/redirect/outbound?p=chemspider&param=406603	0.0356998	1.08937
	0.85_1012.9792m/z		1012.98	1	0.851583	0.0787167	6	1	1.17766	JEV	Ctrl	93.6 - 95.7 - 98.8 - 100 - 91.1 - 89.4 - 93.2 - 93.3 - 94.2 - 90 - 87.8 - 87.6 - 87.9	4491.11	9.36	4136.2	4229	3779.44	3586.28	3337.01	4615.34	5159.28	4234.45	4089.63	4356.86	4012.36	5217.01	5713.62	4088.54	2156.72	5235.48	6057.83	3733.9	4026.34	5207.54	x	x	x	x	CSID8544388	2-hydroxy-dATP	2M-H	C10H16N5O13P3	21.9	5.95	-4.92948	9.16179	http://nonlinear.com/redirect/outbound?p=chemspider&param=8544388	0.0256701	2.24734
	0.94_802.1089m/z		802.109	1	0.94455	0.134917	3	1	1.17464	JEV	Ctrl	100 - 99 - 68.1	1352.7	7.36	1183.58	1232.41	1112.18	1206.89	1022.9	1253.95	1656.01	1318.11	1228.26	1307.18	1148.14	1520.34	1681.36	1375.92	661.1	1422.44	1944.42	1162.3	1209.26	1562.41	x	x	x	x	HMDB0002307	Acrylyl-CoA	M-H2O-H	C24H38N7O17P3S	30.7	2.4	1.22568	52.7874	http://nonlinear.com/redirect/outbound?p=hmdb&param=HMDB0002307	0.0382043	1.17518
	0.94_655.1103m/z		655.11	1	0.94455	0.08565	39	1	1.16073	JEV	Ctrl	100 - 38.4 - 21.1 - 1.57	3166.46	7.11	3104.72	2829.29	2294.49	2868.4	2543.03	2985.92	3326.21	3479.89	3062.88	2977.39	3011.76	3490.3	3468.72	3270.12	1643.57	3387.13	3905.5	3068.54	3015.48	3558.73	x	x	x	x	HMDB0033622	Cabbage identification factor 2	2M-H	C15H12N4O3S	40.8	38.9	-12.8107	78.4729	http://nonlinear.com/redirect/outbound?p=hmdb&param=HMDB0033622	0.0374551	1.77885
	0.94_807.0199m/z		807.02	1	0.94455	0.2995	3	1	1.13758	JEV	Ctrl	100 - 72 - 72.5 - 60.8 - 37.9	5948.28	4.45	5802.52	5177.37	4806.57	5536.55	4821.45	5946.24	6232.84	6149.45	5561.75	5851.1	5628.78	6386.95	7266.4	6311.95	3116.11	6745.22	7318.36	5422.54	5475.67	6993.53	x	x	x	x	HMDB0015276	Sulfoxone	2M-H	C14H16N2O6S3	26.5	1.59	-8.51803	40.4741	http://nonlinear.com/redirect/outbound?p=hmdb&param=HMDB0015276	0.0149093	2.40289
	0.91_322.0205m/z		322.021	1	0.908867	0.0715667	6	1	1.1172	JEV	Ctrl	100 - 59.9 - 49.3 - 6.31 - 2.73	1301.12	3.77	1197.05	1194.55	1089.34	1170.69	1171.5	1294.64	1446.79	1164	1355.53	1244.62	1161.21	1473.64	1646.82	1334.64	757.142	1468.6	1698.77	1026.41	1334.56	1487.63	x	x	x	x	HMDB0037131	(卤)-Furilazole	M+FA-H	C11H13Cl2NO3	31.6	6.4	-17.8483	69.5176	http://nonlinear.com/redirect/outbound?p=hmdb&param=HMDB0037131	0.0285189	1.00202
	0.94_785.0361m/z		785.036	1	0.94455	0.32805	3	1	1.10868	JEV	Ctrl	100 - 62.1 - 57.2 - 24.5 - 21.6 - 13.3	7418.61	3.32	7472.39	6736.27	5967.22	6932.32	6348.72	7253.79	7776.49	7577.27	7239.69	7245.8	7248.65	8310.06	9021.02	7903.2	4103.19	8228.46	9130.86	6681.57	7127.65	8660.54	x	x	x	x	HMDB0038408	2-(Methylthio)ethyl glucosinolate	2M-H	C10H19NO9S3	30.1	4.15	-1.24629	48.0092	http://nonlinear.com/redirect/outbound?p=hmdb&param=HMDB0038408	0.0328074	2.30812
	0.94_753.0835m/z		753.084	1	0.94455	0.0856667	2	1	1.09107	JEV	Ctrl	100 - 73.5 - 44.9 - 38.3 - 15.1	2028.47	3.99	1996.19	1727.42	1827.58	1922.32	1822.3	2016.89	1975.45	2148.66	2060.77	1940.56	1936.42	2131	2762.87	2191.54	1177.76	2287.9	2319.5	1894.67	2028.88	2319.45	x	x	x	x	HMDB0038428	2-Hydroxypropyl glucosinolate	2M-H	C10H19NO10S2	31.5	12	0.976599	46.8333	http://nonlinear.com/redirect/outbound?p=hmdb&param=HMDB0038428	0.0203951	1.14342
	11.87_509.2890m/z		509.289	1	11.8655	0.513433	9	1	1.14049	Ctrl	JEV	100 - 23.9 - 4.13 - 0.0177	12602.1	5.62	11854.9	12043.3	12733.6	13654.1	12724.7	11870.3	12259.1	11204.3	9200.38	10714.8	11499.9	14857	19250.3	15566.4	8224.02	13465.3	14394.2	9879.84	9057.99	12806.9	x	x	x	x	HMDB0062305	1-(11Z-eicosenoyl)-glycero-3-phosphate	M+FA-H	C23H45O7P	52.3	65	1.15938	97.8774	http://nonlinear.com/redirect/outbound?p=hmdb&param=HMDB0062305	0.0425509	3.33349
	10.65_572.3010m/z		572.301	1	10.6456	0.2352	4	1	1.25375	Ctrl	JEV	100 - 29 - 7.96 - 0.204	4266.63	14.12	3936.5	3534.35	5139.45	4245.73	4477.11	3710.02	3259.9	4052.63	3323.24	2669.63	3818.63	4360.08	7769.64	4840.35	2893.56	4208.53	3827.66	3573.57	3271.8	3190.87	x	x	x	x	HMDB0011494	LysoPE(0:0/22:5(4Z,7Z,10Z,13Z,16Z))	M+FA-H	C27H46NO7P	39.4	3.46	2.97787	97.0023	http://nonlinear.com/redirect/outbound?p=hmdb&param=HMDB0011494	0.0418599	2.46488
	10.32_563.2726m/z		563.273	1	10.3249	0.185817	3	1	1.25892	Ctrl	JEV	100 - 25.2 - 4.2	2099.01	14.71	2207.01	1796.2	2037.87	1879.54	2574.45	1593.65	2039.68	1458.99	1791.81	1452.45	2140.92	2215.85	3080.77	2142.77	1663.87	1807.78	2394.91	1286.53	1764.08	1736.04	x	x	x	x	HMDB0031935	Blumenol C O-[rhamnosyl-(1->6)-glucoside]	M+FA-H	C25H42O11	39.6	5.82	3.16182	95.8377	http://nonlinear.com/redirect/outbound?p=hmdb&param=HMDB0031935	0.035019	1.74378
	10.32_479.3004n	479.3	478.293	1	10.3249	0.235767	4	1	1.33709	Ctrl	JEV	100 - 26.8 - 0.287	51021.1	9.97	60673	36317	51482.2	43562	63071.1	39587	39026.4	42248.1	37965.9	31964.5	58856.3	44801.7	77828.9	49663	40763	44906.2	45823.3	37254	37378.3	38205.6	x	x	x	x	HMDB0011475	LysoPE(0:0/18:1(11Z))	M-H, 2M-H	C23H46NO7P	39.9	5.81	-1.57256	95.6235	http://nonlinear.com/redirect/outbound?p=hmdb&param=HMDB0011475	0.0420494	9.49746
	0.82_369.0959m/z		369.096	1	0.815683	0.0716	56	1	1.39894	Ctrl	JEV	100 - 9.74	950.6	19.27	695.565	820.287	881.66	1129.89	1225.6	885.366	535.351	623.294	643.021	710.538	674.738	1011.93	1332.86	1288.13	792.106	1004.33	628.589	549.615	633.07	849.271	x	x	x	x	CSID23449	Norsolorinic acid	M-H	C20H18O7	38.4	11.4	-5.68625	86.858	http://nonlinear.com/redirect/outbound?p=chemspider&param=23449	0.0391925	1.37044
	14.07_132.8645m/z		132.865	1	14.0669	0.0647	1	1	1.43892	Ctrl	JEV	100	584.788	15.44	546.61	608.392	520.362	398.566	850.009	480.314	309.102	394.331	428.763	419.524	530.243	750.53	786.665	454.385	549.363	544.852	362.936	347.718	422.128	501.436	x	x	x	x	CSID5525	Zinc chloride	M-H	Cl2Zn	19	0	37.1228	26.1335	http://nonlinear.com/redirect/outbound?p=chemspider&param=5525	0.043085	1.09377
	1.06_298.0672m/z		298.067	1	1.05807	0.127783	15	1	1.49579	Ctrl	JEV	100 - 8.15	2374.15	22.39	2023	2056.46	2006.96	3234.43	2549.91	1756.41	1234.19	1433.57	1371.98	2139.98	1962.42	2536.91	3034.04	3687.41	1648.02	1992.41	1449.14	1264.11	1350.74	2557.81	x	x	x	x	HMDB0041141	Marshdine	M-H	C16H13NO5	39.6	25.5	-16.4923	89.5022	http://nonlinear.com/redirect/outbound?p=hmdb&param=HMDB0041141	0.0173826	2.4306
	1.88_322.9997m/z		323	1	1.8818	0.0999333	2	1	1.66979	Ctrl	JEV	100 - 7.3	338.93	17.87	356.333	247.46	332.434	416.026	342.398	284.727	109.331	179.211	193.427	248.196	345.663	305.274	502.562	474.291	221.293	322.985	128.372	158.026	190.433	296.656	x	x	x	x	CSID2314551	Ranelic acid	M-H2O-H	C12H10N2O8S	37.1	4.23	5.02372	87.0732	http://nonlinear.com/redirect/outbound?p=chemspider&param=2314551	0.0179719	1.05984
	9.73_319.2263m/z		319.226	1	9.73272	0.0999333	82	1	1.76753	Ctrl	JEV	100 - 12.9 - 8.97	343.908	25.73	285.634	486.791	306.658	270.215	370.243	223.024	244.468	158.097	222.024	125.238	277.081	600.519	463.594	308.059	239.289	252.991	287.045	139.409	218.588	149.69	x	x	x	x	CSID133163	16-Fluorohexadecanoic acid	M+FA-H	C16H31FO2	47	55.1	-9.82868	90.518	http://nonlinear.com/redirect/outbound?p=chemspider&param=133163	0.00840789	1.10529
	1.33_298.0673m/z		298.067	1	1.33025	0.128983	15	1	1.90264	Ctrl	JEV	100 - 7.41 - 0.159	1201.02	24.08	1015.01	716.922	809.245	1220.89	2243.05	608.18	377.374	700.776	711.513	758.362	984.621	884.415	1223.39	1391.88	1449.69	689.899	443.099	617.938	700.502	906.432	x	x	x	x	CSID37997	phosphopantothenic acid	M-H	C9H18NO8P	37.2	0	-8.15505	95.2343	http://nonlinear.com/redirect/outbound?p=chemspider&param=37997	0.03895	1.88966
	1.58_182.0423m/z		182.042	1	1.58158	0.107133	23	1	1.96754	Ctrl	JEV	100 - 7.11	448.791	37.05	734.757	223.549	425.137	309.503	551.01	314.327	137.92	248.6	298.716	140.925	712.756	275.777	642.707	352.85	356.119	356.563	161.94	219.213	294.094	168.44	x	x	x	x	HMDB0000017	4-Pyridoxic acid	M-H	C8H9NO4	44.2	43.4	-19.3125	96.95	http://nonlinear.com/redirect/outbound?p=hmdb&param=HMDB0000017	0.0454691	1.21931
pos	3.35_749.2515m/z		749.251	1	3.35103	0.193367	9	1	4.60227	JEV	Ctrl	100	313.313	60.75	116.963	71.4535	4.42016	97.6142	49.9394	216.806	513.094	108.12	519.822	208.725	123.438	142.021	8.10315	129.504	46.696	210.885	838.563	87.0461	813.485	370.604	x	x	x	x	HMDB0034942	Geniposidic acid	2M+H	C16H22O10	36	0.585	2.17568	81.9958	http://nonlinear.com/redirect/outbound?p=hmdb&param=HMDB0034942	0.0284592	1.40374
	1.61_386.1124m/z		386.112	1	1.61122	0.150533	18	1	3.79799	JEV	Ctrl	100 - 18.9	1010.92	63.03	507.772	100.206	102.398	177.743	442.745	1098.67	503.994	434.514	2024.17	993.267	535.882	199.169	187.718	235.81	413.99	1068.67	823.691	349.821	3167.68	1763.6	x	x	x	x	HMDB0136774	3,4,5-trihydroxy-6-[(5-hydroxy-4-methyl-2-oxo-2H-chromen-7-yl)oxy]oxane-2-carboxylic acid	M+NH4	C16H16O10	49	61.6	11.4127	95.9074	http://nonlinear.com/redirect/outbound?p=hmdb&param=HMDB0136774	0.0132667	2.37163
	3.33_962.7504m/z		962.75	1	3.32962	0.279233	1	1	2.26021	JEV	Ctrl	100	1252.19	23.56	674.134	652.722	477.669	601.073	364.482	1154.02	1180.61	1058.06	1814.07	1054.21	711.453	1297.35	875.675	797.439	340.81	1122.51	1929.49	851.834	2838.89	1871.8	x	x	x	x	HMDB0114659	PE-NMe2(24:1(15Z)/24:1(15Z))	M+Na	C55H106NO8P	29.6	0	-4.68307	53.4261	http://nonlinear.com/redirect/outbound?p=hmdb&param=HMDB0114659	0.000691748	2.59876
	1.62_293.0995m/z		293.1	1	1.61843	0.122617	22	1	2.05621	JEV	Ctrl	100	415.035	33.72	231.705	299.845	108.767	244.977	123.929	231.862	625.218	407.81	418.75	391.537	244.532	595.972	199.395	325.01	115.88	225.53	1021.81	328.323	655.315	695.195	x	x	x	x	CSID391371	3-beta-D-glucopyranuronosyloxy-5-methylisoxazole	M+NH4	C10H13NO8	39.5	16.6	5.80559	87.6367	http://nonlinear.com/redirect/outbound?p=chemspider&param=391371	0.0189309	1.32331
	3.33_842.7835m/z		842.783	1	3.32962	0.407717	2	1	1.91934	JEV	Ctrl	100	2372.14	19.1	1429.04	1553.38	1375.88	1117.44	703.805	2294.11	2392.95	2108.96	3121.23	1943.44	1508.15	3087.5	2522.31	1482.5	658.094	2231.46	3910.86	1697.9	4884.51	3450.68	x	x	x	x	HMDB0006230	Bisdiphosphoinositol tetrakisphosphate	M+Na	C6H20O30P8	37.3	0	0.245754	86.9646	http://nonlinear.com/redirect/outbound?p=hmdb&param=HMDB0006230	0.00330141	3.31226
	3.32_842.6574m/z		842.657	1	3.32248	0.456983	1	1	1.90898	JEV	Ctrl	100	2183.28	21.47	1317.16	1439.26	917.521	1189.43	855.071	2010.12	2258.17	1911.17	2960.43	1776.51	1390.08	2860.67	1682.02	1578.01	799.536	1955.23	3690.58	1538.66	4632.88	3154.28	x	x	x	x	CSID30790749	O-[{(2S)-2,3-Bis[(3,7,11,15-tetramethylhexadecyl)oxy]propoxy}(hydroxy)phosphoryl]-L-serine	M+Na	C46H94NO8P	30.8	0	-4.26004	58.9586	http://nonlinear.com/redirect/outbound?p=chemspider&param=30790749	0.00133498	3.15471
	0.75_296.0654m/z		296.065	1	0.74835	0.115233	15	1	1.8211	JEV	Ctrl	100 - 7.07 - 12	2211.71	27.64	1813.79	1177.11	1070.05	1255.03	756.467	1483.14	2643.33	2016.07	1902.2	3013.82	1914.2	2339.63	1961.65	1665.03	707.336	1442.64	4320.06	1623.11	2976.8	5351.2	x	x	x	x	HMDB0001235	5-Aminoimidazole ribonucleotide	M+H	C8H14N3O7P	38	5.75	3.93976	89.0695	http://nonlinear.com/redirect/outbound?p=hmdb&param=HMDB0001235	0.0120845	2.89578
	0.96_233.0585m/z		233.058	1	0.964833	0.11525	26	1	1.81157	JEV	Ctrl	100 - 21.5	401.345	35.7	336.96	284.003	158.336	208.403	120.024	365.967	264.244	600.351	493.276	282.885	355.614	564.484	290.267	276.487	112.228	355.973	431.862	483.335	771.943	502.279	x	x	x	x	HMDB0029952	D-altro-D-manno-Heptose	M+Na	C7H14O7	42.7	47.4	-22.2481	87.5349	http://nonlinear.com/redirect/outbound?p=hmdb&param=HMDB0029952	0.0371649	1.1495
	1.06_252.0612m/z		252.061	1	1.05768	0.1144	7	1	1.80172	JEV	Ctrl	100 - 3.61	539.046	33.32	291.804	450.134	196.678	399.422	157.886	789.995	593.345	531.13	487.389	293.369	307.958	894.687	360.555	529.91	147.632	768.422	969.72	427.606	762.73	520.893	x	x	x	x	CSID4441	osalmid	M+Na	C13H11NO3	38.4	12.4	-8.5796	89.0052	http://nonlinear.com/redirect/outbound?p=chemspider&param=4441	0.0436807	1.33766
	0.77_258.1101m/z		258.11	1	0.769967	0.0863833	33	1	1.78061	JEV	Ctrl	100 - 9.85 - 1.29	6173.92	28.48	5736.85	2552.66	2610.4	3635.11	2801.54	4446.02	6219.01	8865.32	4768.82	6570.41	6054.43	5073.68	4785.45	4822.67	2619.59	4324.61	10163.9	7137.36	7462.87	11666.1	x	x	x	x	HMDB0000982	5-Methylcytidine	M+H	C10H15N3O5	42.9	24.1	6.29923	97.3623	http://nonlinear.com/redirect/outbound?p=hmdb&param=HMDB0000982	0.0159449	4.63326
	2.48_758.7679m/z		758.768	1	2.48052	0.0714	1	1	1.75644	JEV	Ctrl	100 - 9.47	542.567	30.23	419.552	280.899	171.797	390.13	282.126	506.795	473.013	511.185	397.438	824.406	442.778	558.316	314.943	517.583	263.803	492.956	773.057	411.549	621.963	1463.78	x	x	x	x	CSID6429	1-Amino-2,4-dibromoanthraquinone	2M+H	C14H7Br2NO2	21.9	0	-10.5964	20.8188	http://nonlinear.com/redirect/outbound?p=chemspider&param=6429	0.0197584	1.36018
	1.54_641.1535m/z		641.153	1	1.53993	0.214817	4	1	1.73852	JEV	Ctrl	100 - 24.4 - 11.1	1020.18	35.72	984.729	537.204	438.284	385.629	588.183	871.641	766.481	1620.27	1101.77	740.719	1039.24	1067.75	803.475	511.612	549.982	847.838	1252.68	1304.46	1724.2	1315.19	x	x	x	x	HMDB0135631	{[(2E)-1-(4-methoxyphenyl)-3-phenylprop-2-en-1-yl]oxy}sulfonic acid	2M+H	C16H16O5S	39.5	10.4	3.94975	91.9018	http://nonlinear.com/redirect/outbound?p=hmdb&param=HMDB0135631	0.031512	1.74959
	2.49_885.5632m/z		885.563	1	2.48765	0.0856667	10	1	1.7054	JEV	Ctrl	100	323.956	14.07	236.529	265.533	200.755	109.386	137.594	251.461	328.779	315.746	355.515	368.28	249.623	527.774	368.029	145.121	128.658	244.594	537.332	254.203	556.357	653.902	x	x	x	x	HMDB0061603	PS(MonoMe(11,3)/MonoMe(11,5))	M+NH4	C46H78NO12P	31.7	4.23	3.70896	58.5054	http://nonlinear.com/redirect/outbound?p=hmdb&param=HMDB0061603	0.0123685	1.10458
	0.94_306.2501n	306.25	307.257	1	0.943233	0.0792333	1	1	1.64145	JEV	Ctrl	100 - 8.45	4500.44	28.07	4210.54	3234.08	2201.44	2219.21	1843.44	2771.26	5362.58	5918.09	4718.99	3731.31	4443.63	6428.07	4035.75	2944.21	1723.72	2695.58	8764.2	4764.58	7384.89	6625.14	x	x	x	x	CSID12639	Sodium stearate	M+H, 2M+H	C18H35NaO2	35.3	0	-10.9867	88.5755	http://nonlinear.com/redirect/outbound?p=chemspider&param=12639	0.0369177	3.63158
	1.63_249.0544m/z		249.054	1	1.63287	0.172133	18	1	1.61893	JEV	Ctrl	100 - 20.8 - 0.382	516.667	19.04	309.013	333.042	374.118	360.964	218.565	680.351	514.122	508.29	449.857	430.714	326.12	661.956	685.844	478.888	204.369	661.771	840.243	409.218	703.996	764.756	x	x	x	x	HMDB0033925	Oroselone	M+Na	C14H10O3	40.5	18.7	9.77673	94.384	http://nonlinear.com/redirect/outbound?p=hmdb&param=HMDB0033925	0.00464015	1.34461
	2.49_885.7286m/z		885.729	1	2.4948	0.106383	9	1	1.60067	JEV	Ctrl	100	450.926	7.75	338.244	296.752	311.327	231.902	230.331	394.947	450.136	450.309	472.249	486.988	356.969	589.824	570.734	307.663	215.372	384.161	735.67	362.538	739.037	864.675	x	x	x	x	HMDB0048412	TG(14:1(9Z)/o-18:0/22:6(4Z,7Z,10Z,13Z,16Z,19Z))	M+Na	C57H98O5	30	0.107	-2.33477	52.9119	http://nonlinear.com/redirect/outbound?p=hmdb&param=HMDB0048412	0.000537706	1.32734
	1.79_555.1023m/z		555.102	1	1.79163	0.122783	3	1	1.5145	JEV	Ctrl	20.9 - 100 - 26.6	387.75	23.02	323.69	275.003	300.17	210.752	170.512	370.013	422.414	260.774	506.757	378.792	341.609	546.596	550.28	279.604	159.438	359.908	690.363	209.946	793.039	672.567	x	x	x	x	HMDB0060008	N-(2-hydroxymethyl-3-chlorophenyl)anthranilic acid	2M+H	C14H12ClNO3	23.3	2.22	-11.1029	26.4503	http://nonlinear.com/redirect/outbound?p=hmdb&param=HMDB0060008	0.0316807	1.01704
	0.94_613.4057m/z		613.406	1	0.943233	0.0936333	8	1	1.49915	JEV	Ctrl	100 - 0.299	4111.85	21.91	4008.87	3180.77	2356.2	2395.67	1772.41	2885.22	5121.05	4794.35	4154	3604.65	4230.79	6322.1	4319.45	3178.32	1657.29	2806.43	8369.47	3859.87	6500.73	6400.25	x	x	x	x	CSID10128439	2alpha-Fluorotestosterone	2M+H	C19H27FO2	36	0	-0.912376	81.1188	http://nonlinear.com/redirect/outbound?p=chemspider&param=10128439	0.0405818	3.19674
	0.94_243.0468m/z		243.047	1	0.943233	0.0936333	10	1	1.45274	JEV	Ctrl	100 - 10.9	687.335	25.75	683.341	468.617	378.448	421.947	413.303	538.854	744.786	967.338	643.798	541.9	721.17	931.424	693.782	559.794	386.46	524.138	1217.22	778.791	1007.5	962.173	x	x	x	x	HMDB0035149	Chrycorin	M+Na	C12H12O2S	43.4	33.7	7.91945	91.9932	http://nonlinear.com/redirect/outbound?p=hmdb&param=HMDB0035149	0.038957	1.22819
	12.48_311.2543m/z		311.254	1	12.4839	0.18735	2	1	1.45243	JEV	Ctrl	100 - 3.8	866.983	19.92	462.952	589.352	516.571	781.328	634.396	710.206	803.615	977.059	731.548	1112.49	488.581	1171.4	946.992	1036.58	593.193	690.812	1313.37	786.618	1144.82	1975.28	x	x	x	x	HMDB0031060	(R)-2-Hydroxysterculic acid	M+H	C19H34O3	34.5	1.59	-12.1625	83.6801	http://nonlinear.com/redirect/outbound?p=hmdb&param=HMDB0031060	0.0169422	1.47899
	0.94_409.0839m/z		409.084	1	0.943233	0.11525	12	1	1.42529	JEV	Ctrl	100 - 26.5 - 13 - 2.9 - 1.03	3135.45	24.3	3147.16	2156.47	1844.15	1935.83	1915.76	2470.07	3550.45	4246.88	2929.33	2480.53	3321.39	4286.2	3380.75	2568.26	1791.33	2402.62	5802.6	3419.11	4584.2	4404.32	x	x	x	x	HMDB0032026	Sinalexin	2M+H	C10H8N2OS	36.7	14.4	12.7504	82.6384	http://nonlinear.com/redirect/outbound?p=hmdb&param=HMDB0032026	0.0399556	2.57284
	0.94_231.0431m/z		231.043	1	0.943233	0.108033	12	1	1.42207	JEV	Ctrl	100 - 12.4	798.913	22.97	833.102	551.153	461.202	505.562	457.963	646.183	880.656	1072.48	766.063	629.179	879.222	1095.47	845.489	670.726	428.219	628.537	1439.28	863.444	1198.84	1117.14	x	x	x	x	HMDB0029036	Serylcysteine	M+Na	C6H12N2O4S	44.7	43.1	10.0654	91.4574	http://nonlinear.com/redirect/outbound?p=hmdb&param=HMDB0029036	0.0424628	1.28839
	0.94_306.0758n	306.076	613.159	1	0.943233	0.2446	17	1	1.41906	JEV	Ctrl	100 - 26.5 - 10.3 - 1.98	249369	21.71	257855	176476	141787	158062	144462	206294	264244	334008	242248	200049	272130	350765	259928	209700	135080	200661	431862	268905	379102	355199	x	x	x	x	HMDB0141542	2-(3,4,5-trihydroxyphenyl)-3,4-dihydro-2H-1-benzopyran-3,5,7-triol	M+H, 2M+H	C15H14O7	38.7	14.2	5.97943	86.2281	http://nonlinear.com/redirect/outbound?p=hmdb&param=HMDB0141542	0.0372667	22.9508
	3.21_841.2844m/z		841.284	1	3.21497	0.372017	15	1	1.41752	JEV	Ctrl	100	1685.91	14.61	1647.52	1166.97	1335.05	904.143	893.025	1955.87	1621.2	1519.61	1928.5	1404.38	1738.72	2319.47	2447.46	1199.52	835.025	1902.46	2649.57	1223.42	3017.97	2493.56	x	x	x	x	HMDB0129924	3,4,5-trihydroxy-6-{3-[2-(3-hydroxy-5-methoxyphenyl)ethyl]phenoxy}oxane-2-carboxylic acid	2M+H	C21H24O9	33.7	0.0677	-8.31201	77.8846	http://nonlinear.com/redirect/outbound?p=hmdb&param=HMDB0129924	0.0251574	1.99029
	3.21_672.8267m/z		672.827	1	3.20782	0.393433	3	1	1.41674	JEV	Ctrl	100	1991.13	17.79	2190.42	1316.57	1429.65	1053.93	1036.57	2360.73	1680.5	1871.53	2376.77	1666.12	2311.68	2616.82	2620.88	1398.24	969.246	2296.26	2746.48	1506.75	3719.48	2958.29	x	x	x	x	HMDB0004122	Selenocystine	2M+H	C6H12N2O4Se2	18	0	-8.99245	0	http://nonlinear.com/redirect/outbound?p=hmdb&param=HMDB0004122	0.0438935	2.03224
	2.34_869.4233m/z		869.423	1	2.33773	0.0856667	10	1	1.4045	JEV	Ctrl	100 - 14.7	661.587	10.19	681.5	497.868	450.186	436.211	289.479	627.146	778.967	616.559	657.857	627.404	719.227	989.563	825.293	578.719	270.678	610.019	1273.09	496.384	1029.5	1113.99	x	x	x	x	HMDB0014326	Flunisolide	2M+H	C24H31FO6	40.6	22.2	-5.68538	87.0892	http://nonlinear.com/redirect/outbound?p=hmdb&param=HMDB0014326	0.0322495	1.22788
	1.73_508.1041m/z		508.104	1	1.72665	0.194833	18	1	1.38577	JEV	Ctrl	100 - 56.1	511.418	9.5	579.094	256.84	398.749	325.317	285.249	438.226	486.76	536.768	557.718	537.616	611.152	510.497	730.998	431.596	266.723	426.258	795.525	432.145	872.79	954.567	x	x	x	x	HMDB0126146	3,4,5-trihydroxy-6-({14-hydroxy-16,18-dioxo-6,8,19-trioxapentacyclo[10.7.0.0²,⁹.0³,⁷.0¹³,¹⁷]nonadeca-1,4,9,11,13(17)-pentaen-11-yl}oxy)oxane-2-carboxylic acid	M+NH4	C22H18O13	40.4	35.6	-9.16187	76.5632	http://nonlinear.com/redirect/outbound?p=hmdb&param=HMDB0126146	0.0407938	1.01347
	0.90_176.0374m/z		176.037	1	0.9	0.0722833	2	1	1.37741	JEV	Ctrl	62.4 - 100 - 3.41	607.69	18.97	551.646	433.774	426.096	473.557	320.844	582.757	477.447	787.303	491.033	699.909	582.185	862.171	781.131	628.265	300.006	566.843	780.304	633.847	768.432	1242.73	x	x	x	x	CSID7093	Benzenesulfonic acid	M+NH4	C6H6O3S	26.9	0	-1.08476	35.6104	http://nonlinear.com/redirect/outbound?p=chemspider&param=7093	0.0432062	1.10233
	2.48_759.1724m/z		759.172	1	2.48052	0.08565	5	1	1.36168	JEV	Ctrl	100	573.62	16.55	569.66	356.983	335.295	483.194	361.166	601.293	487.399	525.2	527.649	726.56	601.195	709.541	614.671	641.05	337.709	584.872	796.568	422.832	825.734	1290.05	x	x	x	x	HMDB0127342	6-[4-(5,7-dihydroxy-6-{4-hydroxy-6-methyl-5-oxo-3-[(3,4,5-trihydroxy-6-methyloxan-2-yl)oxy]oxan-2-yl}-4-oxo-4H-chromen-2-yl)phenoxy]-3,4,5-trihydroxyoxane-2-carboxylic acid	M+Na	C33H36O19	32.7	0	-2.54371	66.7041	http://nonlinear.com/redirect/outbound?p=hmdb&param=HMDB0127342	0.0329204	1.06725
	1.57_606.0836m/z		606.084	1	1.56797	0.1361	11	1	1.36143	JEV	Ctrl	100 - 26.1 - 19.8 - 0.26	726.906	16.1	584.764	423.996	540.049	392.357	728.475	759.998	868.04	731.237	731.962	543.29	617.136	842.736	990.034	520.538	681.162	739.244	1418.66	588.71	1145.47	964.641	x	x	x	x	HMDB0001163	Guanosine diphosphate mannose	M+H	C16H25N5O16P2	38.2	7.27	-1.38182	85.4412	http://nonlinear.com/redirect/outbound?p=hmdb&param=HMDB0001163	0.0446707	1.19593
	3.21_747.5855m/z		747.586	1	3.20782	0.3863	42	1	1.31745	JEV	Ctrl	100	2542.94	16.58	2642.3	1775.59	1898.1	1708.5	1626.47	2915.24	2221.46	2385.9	3064.43	2127.67	2788.57	3529.18	3479.64	2266.66	1520.84	2835.63	3630.59	1920.86	4795.63	3777.79	x	x	x	x	HMDB0115765	PA(a-25:0/i-14:0)	M+H	C42H83O8P	31	0	-5.77219	61.8468	http://nonlinear.com/redirect/outbound?p=hmdb&param=HMDB0115765	0.0379481	2.10766
	0.96_304.0805m/z		304.08	1	0.964833	0.108033	59	1	1.31729	JEV	Ctrl	100 - 3.88	557.459	3.66	474.571	392.284	289.599	455.888	503.59	556.206	578.043	577.565	532.518	542.962	500.843	779.705	530.9	604.824	470.883	541.017	944.711	464.99	833.354	964.06	x	x	x	x	CSID4444933	Fisetin	M+NH4	C15H10O6	44.1	37.7	-3.75377	87.0384	http://nonlinear.com/redirect/outbound?p=chemspider&param=4444933	0.0193353	1.08701
	1.62_218.1385m/z		218.139	1	1.61843	0.351567	12	1	1.30382	JEV	Ctrl	100 - 11.7 - 0.179	3034.72	16.54	2566.2	2273.88	1688.5	2657.94	2451.27	3879.79	3093.12	2632.87	2439.87	3127.96	2708.26	4519.56	3095.41	3526.27	2292.07	3773.84	5055.16	2119.69	3818.23	5553.86	x	x	x	x	HMDB0030990	alpha-Carboxy-delta-nonalactone	M+NH4	C10H16O4	41.5	9.79	-0.723827	98.3789	http://nonlinear.com/redirect/outbound?p=hmdb&param=HMDB0030990	0.0492079	2.266
	3.20_961.1819m/z		961.182	1	3.20068	0.400583	63	1	1.30248	JEV	Ctrl	100	3716.52	14.27	3648.32	2652.65	2964.83	2421.65	2579.68	4185.99	3363.61	3600.58	4335.49	3096.93	3850.29	5272.41	5435.2	3212.79	2412.13	4071.68	5497.24	2898.78	6784.74	5498.76	x	x	x	x	HMDB0030624	Quercetagitrin	2M+H	C21H20O13	34.8	4.07	-6.38523	77.1262	http://nonlinear.com/redirect/outbound?p=hmdb&param=HMDB0030624	0.0242477	2.60252
	3.21_841.1596m/z		841.16	1	3.20782	0.4784	3	1	1.29369	JEV	Ctrl	100	3250.58	12.22	3240.17	2407.05	2637.31	2090.99	2187.75	3467.35	3059.11	2922.1	3845.76	2958.59	3419.54	4784.26	4834.79	2774.1	2045.66	3372.66	4999.58	2352.55	6018.35	5253.14	x	x	x	x	CSID64531	5660	2M+H	C14H20N4O7S2	34.3	0	-2.82196	74.9827	http://nonlinear.com/redirect/outbound?p=chemspider&param=64531	0.0229274	2.41567
	3.21_960.8956m/z		960.896	1	3.20782	0.464133	85	1	1.29045	JEV	Ctrl	100	6756.72	15.25	6706.75	4803.48	5461.23	4761.95	4446.24	7581.87	6174.44	6485.1	8026.37	5515.82	7078.03	9547.4	10011.7	6317.64	4157.46	7374.82	10091	5221.07	12560.7	9793.64	x	x	x	x	HMDB0042577	TG(14:0/20:2n6/24:0)	M+NH4	C61H114O6	30.2	1.08	0.25552	50.4694	http://nonlinear.com/redirect/outbound?p=hmdb&param=HMDB0042577	0.0330148	3.38323
	0.94_421.0853m/z		421.085	1	0.943233	0.10825	17	1	1.28369	JEV	Ctrl	100 - 25 - 62.2	942.991	14.2	971.245	706.478	620.945	687.497	686.799	844.558	1069.48	1102.09	889.669	809.154	1025.01	1404.2	1138.33	912.097	642.193	821.495	1747.88	887.281	1392.27	1436.7	x	x	x	x	HMDB0127341	6-(3,4-dihydroxy-6-methyl-5-oxooxan-2-yl)-5,7-dihydroxy-2-phenyl-4H-chromen-4-one	M+Na	C21H18O8	38.5	36	-10.3674	67.8722	http://nonlinear.com/redirect/outbound?p=hmdb&param=HMDB0127341	0.0328797	1.24592
	0.94_325.0482n	325.048	651.114	1	0.943233	0.179517	1	1	1.24951	JEV	Ctrl	100 - 27.7 - 22.2 - 5.19 - 2.52 - 0.404	24114.6	9.48	24962.3	19932.1	16444.6	18087.3	17070.3	23685	25892.3	26037	24541.3	20417.6	26344.2	39617.1	30146.7	23996.4	15961.6	23038.2	42316.4	20962	38405.4	36252.6	x	x	x	x	CSID82857	flumetsulam	M+H, 2M+H	C12H9F2N5O2S	33.2	0.731	11.3127	77.6582	http://nonlinear.com/redirect/outbound?p=chemspider&param=82857	0.0289619	6.10437
	0.94_634.1301n	634.13	635.137	1	0.936033	0.201183	2	1	1.216	JEV	Ctrl	100 - 35.4 - 20.8 - 3.7	12102.3	10.94	12077.7	9543.84	9355.73	9527.85	9257.32	12925	12167.7	13435.7	12011.8	9971.22	12746.4	18969.4	17151.2	12640.5	8656.07	12572	19886	10816.9	18797.6	17704.5	x	x	x	x	CSID4444468	Actinorhodin	M+H, M+Na	C32H26O14	39	7.88	-3.37143	91.1739	http://nonlinear.com/redirect/outbound?p=chemspider&param=4444468	0.0258345	4.11321
	2.50_815.7530m/z		815.753	1	2.50193	0.0921	9	1	1.20683	Ctrl	JEV	100 - 6.04	813.054	5.64	919.42	883.465	798.436	778.997	684.955	669.018	698.619	609.474	692.024	699.431	970.317	1755.98	1463.71	1033.49	640.469	650.749	1141.77	490.679	1082.97	1241.88	x	x	x	x	HMDB0042570	TG(14:0/18:3(6Z,9Z,12Z)/o-18:0)	M+H	C53H98O5	30.5	0	5.30041	58.6026	http://nonlinear.com/redirect/outbound?p=hmdb&param=HMDB0042570	0.0129788	1.08531
	2.57_539.2818m/z		539.282	1	2.56548	0.1849	5	1	1.22914	Ctrl	JEV	100 - 40.4	766.672	11.62	748.676	791.649	691.474	907.642	693.918	725.312	585.912	524.945	545.964	736.595	790.122	1573.48	1267.63	1204.16	648.849	705.505	957.572	422.626	854.396	1307.87	x	x	x	x	CSID391741	3-O-(alpha-L-olivosyl)oleandolide	M+Na	C26H44O10	42	24.6	-1.69108	87.4011	http://nonlinear.com/redirect/outbound?p=chemspider&param=391741	0.0414733	1.0246
	9.97_257.1817n	257.182	515.309	1	9.97207	0.1002	5	1	1.23812	Ctrl	JEV	100 - 23.4	872.668	10.55	912.204	709.973	925.215	889.993	925.953	682.957	815.613	597.837	791.347	636.421	962.702	1411.14	1696.13	1180.75	865.814	664.307	1332.98	481.311	1238.4	1130	x	x	x	x	HMDB0060552	Dextrorphan	M+Na, 2M+H	C17H23NO	42.8	34	14.4554	94.898	http://nonlinear.com/redirect/outbound?p=hmdb&param=HMDB0060552	0.0256425	1.16366
	9.99_578.2571m/z		578.257	1	9.98633	0.1573	3	1	1.26623	Ctrl	JEV	100 - 73.2	780.217	11.91	755.992	707.215	854.324	684.832	898.724	654.985	535.955	582.751	826.804	480.375	797.843	1405.66	1566.17	908.562	840.354	637.099	875.925	469.165	1293.89	852.932	x	x	x	x	CSID390437	Labriformidin	M+NH4	C29H36O11	34.2	3.39	-4.50512	72.6723	http://nonlinear.com/redirect/outbound?p=chemspider&param=390437	0.0488673	1.07907
	2.59_787.4156m/z		787.416	1	2.59403	0.12135	2	1	1.29712	Ctrl	JEV	100 - 30.1	674.673	6.91	663.278	630.089	673.231	753.023	653.745	507.616	439.877	492.053	453.286	707.816	699.996	1252.37	1234.19	999.031	611.285	493.754	718.903	396.146	709.362	1256.77	x	x	x	x	CSID82626	Oxybutynin Chloride	2M+H	C22H31ClNO3	32.6	0	-7.40295	71.1807	http://nonlinear.com/redirect/outbound?p=chemspider&param=82626	0.0161403	1.12578
	2.26_208.0457m/z		208.046	1	2.2592	0.0999333	5	1	1.33046	Ctrl	JEV	100 - 7.13 - 7.64	1096.56	14.52	1068.84	933.911	857.328	1104.12	1518.61	1027.74	729.645	765.289	832.329	765.972	1128.01	1856.24	1571.68	1464.83	1419.98	999.678	1192.48	616.125	1302.54	1360.03	x	x	x	x	HMDB0033136	2-Amino-4-hydroxy-6-pteridinecarboxylic acid	M+H	C7H5N5O3	39.1	7.86	-4.1601	92.281	http://nonlinear.com/redirect/outbound?p=hmdb&param=HMDB0033136	0.0450337	1.37177
	2.32_393.2286n	393.229	787.455	1	2.32345	0.06425	4	1	1.59586	Ctrl	JEV	100 - 12.1	915.211	16.65	836.858	778.815	859.18	1169.74	931.464	525.372	296.212	653.928	356.169	1035.77	883.185	1547.97	1575.07	1551.88	870.967	511.025	484.107	526.469	557.381	1839.07	x	x	x	x	CSID10128127	oxidized Cypridina luciferin	M+H, 2M+H	C21H27N7O	37.4	2.97	2.24707	86.7433	http://nonlinear.com/redirect/outbound?p=chemspider&param=10128127	0.043598	1.56913
	9.46_1095.5674m/z		1095.57	1	9.45828	0.0859167	2	1	1.67164	Ctrl	JEV	100 - 61.7 - 22 - 3.75 - 0.261	2659.72	31.68	3488.5	1504.8	3285.12	2947.82	2072.35	2295.04	1231.75	1252.69	2076.3	1099.61	3681.62	2990.95	6022.37	3910.85	1937.75	2232.37	2013.08	1008.52	3249.27	1952.42	x	x	x	x	CSID30790862	elpamotide	M+Na	C47H76N16O13	40.8	8.7	0.405833	95.748	http://nonlinear.com/redirect/outbound?p=chemspider&param=30790862	0.0469693	2.79887
	2.99_717.1863m/z		717.186	1	2.99437	0.0571	27	1	2.26011	Ctrl	JEV	100	252.05	32.59	373.912	154.93	238.233	281.605	211.572	33.527	43.4187	187.963	60.0486	232.649	394.612	307.94	436.735	373.603	197.831	32.6114	70.9603	151.327	93.972	413.08	x	x	x	x	HMDB0133882	6-[4-(1-carboxyethyl)-3-hydroxyphenoxy]-3,4,5-trihydroxyoxane-2-carboxylic acid	2M+H	C15H18O10	36.3	0	-1.36835	82.9176	http://nonlinear.com/redirect/outbound?p=hmdb&param=HMDB0133882	0.0333499	1.03566
	9.99_1080.5603m/z		1080.56	1	9.98633	0.06425	6	1	2.47377	Ctrl	JEV	100 - 61.9 - 52.5 - 25.8 - 3.38 - 0.747	1363.02	29.82	1691.21	617.607	1609.93	1824.19	1072.17	753.59	498.198	313.05	552.331	637.783	1784.84	1227.56	2951.37	2420.14	1002.54	733.01	814.219	252.033	864.36	1132.42	x	x	x	x	HMDB0036612	1-Desulfoyessotoxin	M+NH4	C55H82O18S	36.5	5.05	4.01394	82.0434	http://nonlinear.com/redirect/outbound?p=hmdb&param=HMDB0036612	0.00822414	2.671
	1.01_343.0233m/z		343.023	1	1.00803	0.0576333	7	1	3.45325	Ctrl	JEV	100 - 11.4	510.193	27.92	328.018	282.013	502.856	1317.95	120.132	129.246	171.279	127.025	207.347	103.818	346.177	560.53	921.849	1748.51	112.33	125.717	279.926	102.266	324.483	184.335	x	x	x	x	CSID2314551	Ranelic acid	M+H	C12H10N2O8S	41.3	17.2	0.827383	90.4068	http://nonlinear.com/redirect/outbound?p=chemspider&param=2314551	0.0471616	1.46298
[truncated: 1 more columns]

## Sheet: ZIKV_Feces
															Normalised abundance										Raw abundance
															Ctrl					ZIKV					Ctrl					ZIKV					Tags
	Compound	Neutral mass (Da)	m/z	Charge	Retention time (min)	Chromatographic peak width (min)	Identifications	q Value	Max Fold Change	Highest Mean	Lowest Mean	Isotope Distribution	Maximum Abundance	Minimum CV%	Ctrl-1_neg	Ctrl-2_neg	Ctrl-3_neg	Ctrl-4_neg	Ctrl-5_neg	ZIKV-1_neg	ZIKV-2_neg	ZIKV-3_neg	ZIKV-4_neg	ZIKV-5_neg	Ctrl-1_neg	Ctrl-2_neg	Ctrl-3_neg	Ctrl-4_neg	Ctrl-5_neg	ZIKV-1_neg	ZIKV-2_neg	ZIKV-3_neg	ZIKV-4_neg	ZIKV-5_neg	ZIKV vs Ctrl VIP>1	Minimum CV <= 30	ZIKV vs Ctrl Anova p-value <= 0.05	ZIKV vs Ctrl	Accepted Compound ID	Accepted Description	Adducts	Formula	Score	Fragmentation Score	Mass Error (ppm)	Isotope Similarity	Compound Link	Anova (p)	VIP
neg	2.49_1087.9997m/z		1088	1	2.4923	0.142067	8	0.0948445	Infinity	ZIKV	Ctrl	100 - 71.7 - 5.8	4131.84	120.13	0	0	0	0	0	3143.41	3178.94	12.0373	12699.3	1625.48	0	0	0	0	0	3806.13	3713.53	12.602	14078.7	1591.9	x	x	x	x	HMDB0047164	TG(24:0/24:0/22:4(7Z,10Z,13Z,16Z))	M-H2O-H	C73H134O6	35.6	0	-0.416879	78.5798	http://nonlinear.com/redirect/outbound?p=hmdb&param=HMDB0047164	0.000188601	1.20142
	2.71_1039.5925m/z		1039.59	1	2.71288	0.0927833	6	0.444024	722.86	ZIKV	Ctrl	100 - 56.5 - 17.5 - 1.47	4110.92	128.23	0.903871	1.94446	8.1424	17.4224	0.021898	12405.3	16.4599	16.2157	20.2157	8096.42	0.977231	1.64729	8.76349	17.4821	0.0189658	15020.6	19.2279	16.9764	22.4115	7929.14	x	x	x	x	HMDB0116817	CL(8:0/8:0/8:0/18:2(9Z,11Z))	M-H	C51H94O17P2	38.5	0	3.02869	96.2376	http://nonlinear.com/redirect/outbound?p=hmdb&param=HMDB0116817	0.0317012	1.12804
	4.41_759.4339m/z		759.434	1	4.41115	0.0571167	4	0.323051	13.0044	ZIKV	Ctrl	100 - 46.9 - 16.8 - 2.63	17167.7	93.3	235.734	1396.37	519.911	3833.29	615.427	10838.1	43311.3	19936.6	1400.2	10352.1	254.866	1182.97	559.57	3846.41	533.019	13123.1	50594.8	20872	1552.29	10138.2	x	x	x	x	CSID10128280	(1'R,2R,4S,4'S,5S,6R,8'R,10'E,12'S,13'S,14'E,16'E,20'R,21'R,24'S)-6-[(2S)-2-Butanyl]-4,24'-dihydroxy-21'-methoxy-5,11',13',22'-tetramethyl-2'-oxo-3,4,5,6-tetrahydrospiro[pyran-2,6'-[3,7,19]trioxatetracyclo[15.6.1.1~4,8~.0~20,24~]pentacosa[10,14,16,22]tetraen]-12'-yl 2,6-dideoxy-3-O-methyl-alpha-L-arabino-hexopyranoside	M-H	C42H64O12	43.9	24.3	1.83519	97.2657	http://nonlinear.com/redirect/outbound?p=chemspider&param=10128280	0.00889855	2.4876
	5.17_431.2079m/z		431.208	1	5.1666	0.24935	26	0.444024	4.29799	ZIKV	Ctrl	100 - 23.2 - 13.9	104837	18.67	27995.5	23435.6	23722	29178.3	17629.1	36951.2	328914	38315.4	68243.2	51761.6	30267.7	19853.9	25531.5	29278.2	15268.5	44741.5	384226	40113	75655.7	50692.2	x	x	x	x	HMDB0038787	Melleolide B	M-H	C24H32O7	40.1	10.7	0.774995	90.7262	http://nonlinear.com/redirect/outbound?p=hmdb&param=HMDB0038787	0.0327437	4.7997
	6.57_208.1433n	208.143	415.212	1	6.57173	0.106583	15	0.45166	3.19725	ZIKV	Ctrl	100 - 16.9	15683.2	38.91	4459.3	5003.82	3757.75	8094.85	3210.35	6812.11	41407.2	9076.94	14404.1	6715.73	4821.23	4239.08	4044.39	8122.55	2780.47	8248.3	48370.4	9502.78	15968.6	6576.97	x	x	x	x	HMDB0038047	Carvyl propionate	M+FA-H, 2M-H	C13H20O2	37.8	7.63	-14.6482	96.6641	http://nonlinear.com/redirect/outbound?p=hmdb&param=HMDB0038047	0.0352515	1.84679
	4.41_334.2105n	334.211	379.21	1	4.41115	0.250067	36	0.333018	3.19408	ZIKV	Ctrl	100 - 24.9	96233	49.79	13316.6	36959.6	19919.5	51686.8	28760.4	76940.6	168118	117387	37093.9	81626.3	14397.4	31311.1	21439	51863.6	24909.2	93161.9	196389	122894	41123	79939.7	x	x	x	x	HMDB0041055	Phytocassane B	M-H, M+FA-H	C20H30O4	42.8	31.4	-11.5908	95.1578	http://nonlinear.com/redirect/outbound?p=hmdb&param=HMDB0041055	0.0103406	5.4706
	3.62_382.2321n	382.232	381.225	1	3.61845	0.107083	3	0.260682	3.07514	ZIKV	Ctrl	100 - 23.3	23523.3	31.59	5417.42	8300.33	5766.62	11432.3	7330.85	26309.9	25738.3	32210.2	9171.66	24186.5	5857.11	7031.79	6206.5	11471.4	6349.22	31856.7	30066.5	33721.4	10167.9	23686.7	x	x	x	x	HMDB0240273	Pyrvinium	M-H, 2M-H	C26H28N3+	36.2	0.0843	9.99574	91.9021	http://nonlinear.com/redirect/outbound?p=hmdb&param=HMDB0240273	0.00307687	2.86763
	7.71_349.2357m/z		349.236	1	7.7131	0.1073	50	0.319969	2.83084	ZIKV	Ctrl	100 - 19.8 - 0.41	6208.33	37.85	1308.43	2324.14	1442.17	4504.37	1386.41	6823.95	8985.04	4324.96	3295.34	7612.36	1414.62	1968.94	1552.18	4519.78	1200.76	8262.63	10496	4527.87	3653.28	7455.07	x	x	x	x	CSID223205	MFCD18429450	M+FA-H	C20H32O2	51.5	71.1	-8.89599	96.1455	http://nonlinear.com/redirect/outbound?p=chemspider&param=223205	0.00634591	1.39266
	4.58_382.2333n	382.233	381.226	1	4.58175	0.249133	2	0.271579	2.7005	ZIKV	Ctrl	100 - 25.5 - 12.2 - 2.72	114347	34.74	20367.2	51576.8	34611.2	56330.8	48829.1	102754	169819	96200.5	62352.1	140610	22020.2	43694.3	37251.3	56523.5	42290.7	124418	198377	100714	69124.7	137705	x	x	x	x	HMDB0240273	Pyrvinium	M-H, 2M-H	C26H28N3+	35.9	2.92	12.9376	90.0628	http://nonlinear.com/redirect/outbound?p=hmdb&param=HMDB0240273	0.00435243	6.01273
	5.50_1024.5086m/z		1024.51	1	5.50252	0.142267	10	0.459547	2.64167	ZIKV	Ctrl	100 - 60.8 - 32.4 - 37.2 - 28.6	13418.3	24.73	5951	3564.62	5433.26	6466.81	3981.63	7439.89	28387.6	4327.49	16169.1	10767.2	6433.99	3019.84	5847.71	6488.94	3448.48	9008.42	33161.4	4530.51	17925.3	10544.8	x	x	x	x	HMDB0006976	CDP-DG(16:0/22:6(4Z,7Z,10Z,13Z,16Z,19Z))	M-H	C50H81N3O15P2	33.6	0.0645	1.52786	69.8843	http://nonlinear.com/redirect/outbound?p=hmdb&param=HMDB0006976	0.0482989	1.73618
	9.65_561.3772m/z		561.377	1	9.64743	0.1278	5	0.320027	2.48209	ZIKV	Ctrl	100 - 23.8	5318.25	43.86	1077.08	4159.07	1618.18	1759.86	2099.07	4872.44	9421.8	4431.96	3709.13	4155.94	1164.5	3523.44	1741.62	1765.89	1818	5899.68	11006.2	4639.88	4112.02	4070.07	x	x	x	x	HMDB0034645	22-Acetylpriverogenin B	M+FA-H	C32H52O5	45.5	46.8	-4.84372	86.1577	http://nonlinear.com/redirect/outbound?p=hmdb&param=HMDB0034645	0.0085703	1.18197
	6.22_363.2148m/z		363.215	1	6.21532	0.2993	76	0.332271	2.47497	ZIKV	Ctrl	100 - 24 - 21.7 - 3.75	33757	38.77	9723.48	15904.4	9246.02	24314.6	9008.37	43107.4	49839.7	27540.5	16535.5	31761.9	10512.7	13473.7	9951.3	24397.8	7802.11	52195.7	58221	28832.5	18331.6	31105.7	x	x	x	x	HMDB0035311	Galanal A	M+FA-H	C20H30O3	47.4	63	-8.98431	83.8307	http://nonlinear.com/redirect/outbound?p=hmdb&param=HMDB0035311	0.0100405	3.06558
	6.76_403.2468m/z		403.247	1	6.76468	0.135633	17	0.45166	2.17915	ZIKV	Ctrl	100 - 17.1	17165.7	30.65	7631.63	8304.95	5359.76	11692.2	6397.76	19054.3	24745	6456.8	11152.2	24420.2	8251.03	7035.7	5768.6	11732.2	5541.07	23071.5	28906.3	6759.72	12363.5	23915.6	x	x	x	x	HMDB0060114	24,25,26,27-Tetranor-23-oxo-hydroxyvitamin D3	M+FA-H	C23H34O3	54.5	88.8	-6.0983	90.4204	http://nonlinear.com/redirect/outbound?p=hmdb&param=HMDB0060114	0.0431881	1.96549
	5.99_365.2301m/z		365.23	1	5.9874	0.17775	68	0.344224	2.06139	ZIKV	Ctrl	100 - 23.8 - 19.2	23952.7	29.52	8280.01	13470.7	8888.82	16569.7	10889.1	37873.5	24131.4	16724.9	14627.6	26406.1	8952.03	11411.9	9566.85	16626.4	9431	45858.3	28189.4	17509.5	16216.4	25860.5	x	x	x	x	HMDB0038694	Crispane	M+FA-H	C20H32O3	38.6	16.8	-9.98985	87.2797	http://nonlinear.com/redirect/outbound?p=hmdb&param=HMDB0038694	0.0111482	2.34956
	6.39_363.2098m/z		363.21	1	6.39378	0.192933	4	0.45166	2.01997	ZIKV	Ctrl	100 - 17.8	5356.13	37.48	2124.12	3052.78	1659.6	4185.78	2235.66	6568.35	7276.5	5990.22	2143.23	4802.34	2296.52	2586.22	1786.19	4200.1	1936.3	7953.14	8500.16	6271.25	2376.03	4703.12	x	x	x	x	HMDB0240273	Pyrvinium	M-H2O-H	C26H28N3+	39.9	13.8	-1.74062	87.8096	http://nonlinear.com/redirect/outbound?p=hmdb&param=HMDB0240273	0.0379117	1.08885
	6.81_449.2529m/z		449.253	1	6.80752	0.164167	15	0.415156	1.95907	ZIKV	Ctrl	100 - 17.9	13967.5	22.27	7057.86	6820.76	5375.21	9718.74	6675.82	14547.5	19573.2	6422.53	11135.7	18158.7	7630.69	5778.34	5785.23	9751.99	5781.9	17614.5	22864.8	6723.85	12345.3	17783.6	x	x	x	x	HMDB0014372	Lovastatin	M+FA-H	C24H36O5	40.7	18.7	-3.93975	89.6282	http://nonlinear.com/redirect/outbound?p=hmdb&param=HMDB0014372	0.0241111	1.73912
	12.46_483.3153m/z		483.315	1	12.4618	0.791933	10	0.418795	1.95205	ZIKV	Ctrl	100 - 18.2	20607.5	33.21	13153.2	11758.9	7663.39	14117.6	6091.04	16399.5	33118	13030.1	15128.6	25361.2	14220.7	9961.8	8247.95	14165.9	5275.43	19857	38687.3	13641.4	16771.9	24837.2	x	x	x	x	HMDB0034704	22-Deoxoisocucurbitacin D	M-H2O-H	C30H46O6	40.1	24.6	7.32684	83.902	http://nonlinear.com/redirect/outbound?p=hmdb&param=HMDB0034704	0.0252145	2.04764
	5.70_1125.5318m/z		1125.53	1	5.70168	0.121333	2	0.459547	1.83426	ZIKV	Ctrl	100 - 53.7 - 30.3 - 17	7450.78	32.5	3352.78	4829.36	3221.37	2893.71	6012.86	7322.11	13913.6	4874.11	4828.62	6315.4	3624.89	4091.29	3467.09	2903.61	5207.71	8865.82	16253.4	5102.78	5353.1	6184.92	x	x	x	x	HMDB0029769	Isoeruboside B	M+FA-H	C51H84O24	43.3	30.6	-1.49661	87.5725	http://nonlinear.com/redirect/outbound?p=hmdb&param=HMDB0029769	0.0455891	1.09599
	2.63_343.1925m/z		343.193	1	2.63437	0.0785167	39	0.320027	1.8245	ZIKV	Ctrl	100 - 33.7	5635.21	23.91	2711.57	2183.81	3818.16	4198.02	2531.63	6751.51	5263.25	3747.68	5295.74	7117.89	2931.64	1850.06	4109.41	4212.38	2192.64	8174.92	6148.34	3923.51	5870.96	6970.82	x	x	x	x	HMDB0030026	Isohumulone A	M-H2O-H	C21H30O5	38.6	7.02	2.93199	89.4706	http://nonlinear.com/redirect/outbound?p=hmdb&param=HMDB0030026	0.00697361	1.12497
	8.41_499.3093m/z		499.309	1	8.41267	0.428083	49	0.451473	1.80786	ZIKV	Ctrl	100 - 27.4	65874.1	18.93	40390.7	37722.4	29997.9	45127.1	28950.3	51080.9	127198	45178.3	53679.8	52233.2	43668.9	31957.3	32286.2	45281.5	25073.7	61850.2	148589	47297.9	59510.5	51153.9	x	x	x	x	HMDB0035117	(3beta,6beta)-Furanoeremophilane-3,6-diol	2M-H	C15H22O3	45	41.2	5.61111	90.0518	http://nonlinear.com/redirect/outbound?p=hmdb&param=HMDB0035117	0.0343684	3.21448
	4.09_377.1925m/z		377.193	1	4.08968	0.12135	51	0.383662	1.79627	ZIKV	Ctrl	100 - 17.4	7150.75	20.61	3125.38	4523.17	3145.15	4947.11	4163.62	4590.68	11205.9	8346.96	5746.09	5864.1	3379.04	3831.89	3385.06	4964.04	3606.09	5558.53	13090.4	8738.56	6370.22	5742.94	x	x	x	x	HMDB0036604	N-Methylcalystegine B2	2M-H	C8H15NO4	38.2	0.156	-1.04619	92.197	http://nonlinear.com/redirect/outbound?p=hmdb&param=HMDB0036604	0.016909	1.16218
	2.48_1185.4684m/z		1185.47	1	2.47803	1.49792	1	0.260682	1.77426	ZIKV	Ctrl	92.3 - 100 - 5.62	29888.2	4.73	16179.4	16992.2	18024.6	16999.6	16031.5	38612	23299.2	20544.4	28365.9	38619.5	17492.5	14395.3	19399.5	17057.8	13884.8	46752.4	27217.3	21508.2	31447	37821.6	x	x	x	x	HMDB0060139	4-Hydroxy-17beta-estradiol-2-S-glutathione	2M-H	C28H39N3O9S	34.7	18	-4.82563	60.9574	http://nonlinear.com/redirect/outbound?p=hmdb&param=HMDB0060139	0.0031951	2.52984
	5.88_959.4592m/z		959.459	1	5.88013	1.41922	5	0.45166	1.70999	ZIKV	Ctrl	100 - 73.7 - 16.7 - 7.26 - 6.54 - 6.42 - 6.4	70811.4	4.93	41962.8	41119.8	42970.1	38030.7	42968.3	52603.5	133470	45083.9	58853.2	64045.9	45368.6	34835.4	46247.8	38160.9	37214.6	63693.8	155915	47199	65245.8	62722.6	x	x	x	x	HMDB0036161	4-Propanoyl-HT2 toxin	2M-H	C25H36O9	31.2	0.672	-5.57716	61.8626	http://nonlinear.com/redirect/outbound?p=hmdb&param=HMDB0036161	0.0420519	3.18982
	4.74_1031.4589m/z		1031.46	1	4.7388	0.58505	2	0.266761	1.70282	ZIKV	Ctrl	90.9 - 82.2 - 100 - 4.61 - 5.07	22320.4	1.4	13028.2	13050.1	12892.5	13375.5	13193.2	22285	34348.3	16589.3	18992.8	19386.8	14085.6	11055.7	13875.9	13421.3	11426.6	26983.3	40124.5	17367.6	21055.7	18986.3	x	x	x	x	HMDB0060863	Perindoprilat glucuronide	2M-H	C23H36N2O11	32	20	2.26793	42.486	http://nonlinear.com/redirect/outbound?p=hmdb&param=HMDB0060863	0.00410248	2.05277
	3.11_371.2207m/z		371.221	1	3.11213	0.163467	31	0.175732	1.70243	ZIKV	Ctrl	100 - 25.5	7632.9	13.41	4564.17	3854.68	5099.52	5025.46	3873.84	9823.55	7646.22	6220.01	6351.64	8123.07	4934.61	3265.57	5488.51	5042.66	3355.11	11894.6	8932.05	6511.83	7041.55	7955.23	x	x	x	x	HMDB0013656	15-deoxy-delta12,14-Prostaglandin J2-2-glycerol ester	M-H2O-H	C23H34O5	40.4	11.6	-5.3501	96.4066	http://nonlinear.com/redirect/outbound?p=hmdb&param=HMDB0013656	0.000987753	1.29862
	7.07_539.3032m/z		539.303	1	7.07115	0.113517	10	0.408912	1.66465	ZIKV	Ctrl	100 - 26.2 - 16.6	26998.6	26.06	17565.8	18182	13357.9	22226.8	9761.18	24489.6	28760.4	19286.5	24394.6	38061.7	18991.4	15403.3	14376.8	22302.8	8454.12	29652.7	33596.9	20191.4	27044.3	37275.3	x	x	x	x	HMDB0034927	Cucurbitacin B	M-H2O-H	C32H46O8	42.7	30.2	3.2072	87.2777	http://nonlinear.com/redirect/outbound?p=hmdb&param=HMDB0034927	0.0205326	2.20162
	6.42_287.2197m/z		287.22	1	6.41518	0.142967	60	0.427802	1.63052	ZIKV	Ctrl	100 - 15.9 - 0.44	9792.42	27.1	3958.27	6405.58	8442.11	5606.03	5616.47	12887.7	6998.18	10550	11669.6	6856.59	4279.54	5426.61	9086.07	5625.21	4864.4	15604.7	8175.03	11045	12937.2	6714.92	x	x	x	x	HMDB0072870	MG(0:0/i-13:0/0:0)	M-H	C16H32O4	37	0	-10.7446	96.6198	http://nonlinear.com/redirect/outbound?p=hmdb&param=HMDB0072870	0.0270497	1.28322
	11.11_483.2736m/z		483.274	1	11.1054	0.228	5	0.45166	1.6172	ZIKV	Ctrl	100 - 20.9	28107.1	29	11289	23499.2	14696.4	21569.4	15846.7	25405.4	31764.4	17902.3	23808.6	41654.7	12205.3	19907.8	15817.5	21643.2	13724.8	30761.5	37106.1	18742.2	26394.7	40794.1	x	x	x	x	HMDB0007850	LysoPA(0:0/18:0)	M+FA-H	C21H43O7P	43.7	26.3	1.62116	94.3747	http://nonlinear.com/redirect/outbound?p=hmdb&param=HMDB0007850	0.0404833	2.07852
	9.66_499.3095m/z		499.309	1	9.66172	0.749917	49	0.320027	1.61588	ZIKV	Ctrl	100 - 26.8	58213	4.15	38049.6	36848.7	34975.7	35975	34278.8	78222.9	52993.2	72838.8	45935	41075.4	41137.8	31217.1	37643.6	36098.1	29688.7	94714.4	61904.7	76256.1	50924.4	40226.7	x	x	x	x	HMDB0035304	Ganoderic acid C2	M-H2O-H	C30H46O7	40.5	19.3	5.74537	89.7842	http://nonlinear.com/redirect/outbound?p=hmdb&param=HMDB0035304	0.00790723	3.20258
	6.58_539.3047m/z		539.305	1	6.57887	0.113517	7	0.459547	1.60371	ZIKV	Ctrl	100 - 37.6 - 25.4 - 1.56	75838.6	24.23	44338.2	62147.7	32818.7	72246.7	24896.1	56821.8	78819.5	59880.8	81511.4	102160	47936.8	52649.7	35322.1	72493.9	21562.4	68801.4	92074.2	62690.1	90365.1	100049	x	x	x	x	HMDB0015480	Ciclesonide	M-H	C32H44O7	45.5	47.1	6.12446	87.4769	http://nonlinear.com/redirect/outbound?p=hmdb&param=HMDB0015480	0.047829	3.41152
	5.88_1027.5559m/z		1027.56	1	5.88013	0.371367	6	0.459547	1.60016	ZIKV	Ctrl	69.4 - 100 - 78.4 - 1.15	57724.6	19.63	37689.2	37520.8	44595	24980.4	35586.4	46314.1	86141.9	36041.1	47654.6	72471.4	40748.1	31786.5	47996.7	25065.8	30821.2	56078.4	100628	37732	52830.8	70974	x	x	x	x	HMDB0015357	Mivacurium	M-H	C58H80N2O14+2	30.6	0	2.15796	55.5925	http://nonlinear.com/redirect/outbound?p=hmdb&param=HMDB0015357	0.0465582	2.90855
	3.40_1031.4030m/z		1031.4	1	3.39787	3.08175	1	0.299672	1.58831	ZIKV	Ctrl	100 - 92.6 - 95.9	128968	2.72	77674	82632.2	83241.2	80560.6	81881.3	135380	104400	95365.3	184577	125115	83978.2	70003.5	89590.8	80836.2	70917	163922	121956	99839.5	204626	122530	x	x	x	x	HMDB0010147	PIP3(16:0/16:0)	M-H2O-H	C41H82O22P4	30.9	3.95	-3.83429	54.9629	http://nonlinear.com/redirect/outbound?p=hmdb&param=HMDB0010147	0.00545301	4.71844
	7.21_539.3023m/z		539.302	1	7.20677	0.171317	10	0.45166	1.58651	ZIKV	Ctrl	100 - 30 - 17.6	63951.6	25	51315.2	46306	30006.2	52482.2	21438.2	50691	89653.3	64852.9	50339.5	64221.2	55480.1	39229.1	32295	52661.8	18567.6	61378.1	104730	67895.5	55807.3	62894.3	x	x	x	x	HMDB0015480	Ciclesonide	M-H	C32H44O7	48.9	57.1	1.57706	89.1262	http://nonlinear.com/redirect/outbound?p=hmdb&param=HMDB0015480	0.0421714	3.15391
	5.25_365.2283m/z		365.228	1	5.25247	0.135633	6	0.444024	1.58106	ZIKV	Ctrl	100 - 22.4 - 27.3 - 4.56	40693.2	16.26	26736.4	27455.9	20618	31239.6	22640	53796.2	49068.9	39326.6	22807.8	38466.3	28906.3	23259.8	22190.7	31346.5	19608.4	65138	57320.6	41171.6	25285.2	37671.6	x	x	x	x	HMDB0014453	Ibutilide	M-H2O-H	C20H36N2O3S	37.4	7.09	3.93804	84.5386	http://nonlinear.com/redirect/outbound?p=hmdb&param=HMDB0014453	0.0327962	2.54818
	7.85_549.2892m/z		549.289	1	7.84918	0.214617	23	0.414378	1.53487	ZIKV	Ctrl	100 - 29.9	22602.6	18.52	17932.5	16844.6	13174.9	14488.5	11189.6	17796.1	31834.4	16788.5	20739.9	25853.9	19388	14270.3	14179.9	14538.1	9691.23	21548	37187.8	17576.1	22992.7	25319.7	x	x	x	x	CSID10128271	(1'R,2S,4'S,5S,6R,8'R,10'E,12'S,13'S,14'E,16'E,20'S,24'S)-12',24'-Dihydroxy-6-isopropyl-5,11',13',22'-tetramethyl-5,6-dihydro-2'H,21'H-spiro[pyran-2,6'-[3,7,19]trioxatetracyclo[15.6.1.1~4,8~.0~20,24~]pentacosa[10,14,16,22]tetraene]-2',21'-dione	M-H2O-H	C33H44O8	48.9	62.6	6.11879	88.8691	http://nonlinear.com/redirect/outbound?p=chemspider&param=10128271	0.0222749	1.83726
	5.69_1039.4461m/z		1039.45	1	5.69455	2.70377	7	0.160143	1.52072	ZIKV	Ctrl	100 - 89.7	70039.8	2.96	43898.8	45635.1	46948.5	46472.2	47329.8	76480.2	82647.6	54024.4	64355.7	72691.1	47461.8	38660.7	50529.7	46631.2	40992.1	92604.3	96546	56559	71346	71189.1	x	x	x	x	HMDB0030142	Physalolactone C	2M-H	C28H37ClO7	34.3	25.7	7.46563	54.3835	http://nonlinear.com/redirect/outbound?p=hmdb&param=HMDB0030142	0.000636247	3.62149
	2.39_1035.3829m/z		1035.38	1	2.39218	0.506717	3	0.160143	1.51999	ZIKV	Ctrl	100 - 73.3	14821.1	11.89	8841.63	10206.9	9108.52	8735.78	11861	12806.4	16891.7	15491.9	13159.7	15755.7	9559.24	8646.96	9803.31	8765.66	10272.8	15506.4	19732.3	16218.7	14589.1	15430.2	x	x	x	x	HMDB0040723	(-)-Gossypol	2M-H	C30H30O8	34.2	0	2.00197	73.3415	http://nonlinear.com/redirect/outbound?p=hmdb&param=HMDB0040723	0.000713221	1.68062
	2.96_387.2205m/z		387.221	1	2.9558	0.0642333	18	0.382271	1.51485	ZIKV	Ctrl	100 - 20.5	7639.2	16.48	4850.55	5351.92	3828.1	5066.89	6116.89	9640.66	5785.78	8724.57	5778.41	8266.57	5244.23	4533.98	4120.11	5084.22	5297.82	11673.2	6758.75	9133.89	6406.06	8095.77	x	x	x	x	HMDB0062685	14-oxo-DoHE(1-)	M+FA-H	C22H30O3	37.8	3.8	8.20611	94.0871	http://nonlinear.com/redirect/outbound?p=hmdb&param=HMDB0062685	0.0155075	1.09344
	2.81_700.2788m/z		700.279	1	2.81282	1.09868	1	0.240938	1.48169	ZIKV	Ctrl	85.6 - 100 - 77.8	93061.9	5.37	59154.7	67939.8	63938.9	60729.7	62277.3	109935	89673.5	68421.7	99915.2	97363.8	63955.8	57556.5	68816.2	60937.5	53938.1	133113	104753	71631.7	110768	95352.1	x	x	x	x	CSID8028321	CP 424391-18	M+FA-H	C32H41N5O10	27.8	0	-7.19192	47.1149	http://nonlinear.com/redirect/outbound?p=chemspider&param=8028321	0.00189046	4.00031
	1.99_329.1636m/z		329.164	1	1.99272	0.192233	37	0.333018	1.46857	ZIKV	Ctrl	100 - 62.1 - 33.6	10516.3	13.74	8119.54	7875.53	6805.04	7352.72	5651.67	12036.5	13743	8837.11	8886.99	9077.8	8778.54	6671.91	7324.12	7377.88	4894.89	14574.1	16054	9251.71	9852.29	8890.24	x	x	x	x	CSID92141	4-Chloroprogesterone	M-H2O-H	C21H29ClO2	34	6.48	-11.9695	76.2171	http://nonlinear.com/redirect/outbound?p=chemspider&param=92141	0.0102557	1.25077
	6.31_789.6030m/z		789.603	1	6.30812	0.08565	1	0.408912	1.46841	ZIKV	Ctrl	100 - 48.8 - 11.1 - 0.179	10704.2	17.24	8053.33	6414.62	6410.85	9146.04	6423.38	9275.78	15841.1	9876.94	9569.23	8958.06	8706.95	5434.27	6899.86	9177.33	5563.26	11231.4	18505	10340.3	10608.6	8772.97	x	x	x	x	HMDB0013334	9,12-Hexadecadienoylcarnitine	2M-H	C23H41NO4	35.3	0	3.97416	81.133	http://nonlinear.com/redirect/outbound?p=hmdb&param=HMDB0013334	0.0204458	1.18791
	7.64_549.2844m/z		549.284	1	7.64172	0.128483	12	0.45166	1.45144	ZIKV	Ctrl	100 - 35.9	9451.26	19.7	5765.82	8638.9	5361.16	6122.18	6670.11	7603.96	10293	7269.58	8368.94	13720.8	6233.79	7318.61	5770.11	6143.13	5776.95	9207.08	12023.9	7610.64	9277.97	13437.3	x	x	x	x	HMDB0029342	Ceanothine E	M-H2O-H	C34H40N4O4	41.8	22.9	-4.7037	91.5631	http://nonlinear.com/redirect/outbound?p=hmdb&param=HMDB0029342	0.0367128	1.07491
	1.34_267.0698m/z		267.07	1	1.34367	0.228633	130	0.415156	1.45061	ZIKV	Ctrl	100 - 21.2 - 13.8 - 11.7 - 11.7 - 9.39	16998.4	12.05	8376.32	14089.3	11397.6	8484.19	16243.1	17366.1	17078.9	16427.1	14205.2	19914.8	9056.16	11936	12267	8513.22	14068.1	21027.4	19951	17197.8	15748.1	19503.4	x	x	x	x	HMDB0000195	Inosine	M-H	C10H12N4O5	44.9	70.6	-13.8812	68.2363	http://nonlinear.com/redirect/outbound?p=hmdb&param=HMDB0000195	0.0232265	1.55476
	5.85_1003.5054m/z		1003.51	1	5.85158	0.53485	6	0.3919	1.43914	ZIKV	Ctrl	100 - 68.4	16737.7	12.04	11580.3	11646.8	11896.4	9546.94	13481.4	13886.9	23206.1	12891.1	15846.4	17858.1	12520.2	9866.79	12803.8	9579.6	11676.2	16814.6	27108.6	13495.9	17567.6	17489.1	x	x	x	x	HMDB0034339	Ixocarpalactone B	2M-H	C28H38O8	38.4	18.4	-0.62366	74.5408	http://nonlinear.com/redirect/outbound?p=hmdb&param=HMDB0034339	0.0180703	1.48866
	4.41_479.1635m/z		479.163	1	4.41115	0.214383	7	0.178984	1.41308	ZIKV	Ctrl	100 - 55.3	13872.9	5.22	9794.42	10009.2	8959.27	10024.9	10299.6	13513.6	13789.8	12589.1	12078.5	17393.6	10589.4	8479.49	9642.68	10059.2	8920.48	16362.6	16108.8	13179.7	13390.4	17034.2	x	x	x	x	CSID4445173	Flupentixol	M+FA-H	C23H25F3N2OS	35.6	4.58	3.01096	76.7387	http://nonlinear.com/redirect/outbound?p=chemspider&param=4445173	0.00105005	1.46324
	2.44_687.2808m/z		687.281	1	2.44233	0.862717	6	0.320027	1.41297	ZIKV	Ctrl	100 - 82.8	53391.1	3.56	36321	37058.9	39818	38318.1	37416.4	69037.4	45067.8	41784.7	51066.9	59998.4	39268.9	31395.2	42855.3	38449.2	32406.2	83592.4	52646.6	43745.1	56613.8	58758.8	x	x	x	x	HMDB0060896	N-Desmethylritonavir	M-H2O-H	C36H46N6O5S2	41.9	43.7	2.13582	68.5399	http://nonlinear.com/redirect/outbound?p=hmdb&param=HMDB0060896	0.00774575	2.70754
	1.99_315.0867m/z		315.087	1	1.99272	0.142283	97	0.108939	1.41225	ZIKV	Ctrl	100 - 29.1	6849.18	2.39	4781.78	4894.76	4944.94	4947.38	4680.35	7935.64	5781.52	6613.23	6592.87	7322.63	5169.88	4146.69	5322.13	4964.31	4053.64	9608.69	6753.77	6923.49	7308.98	7171.33	x	x	x	x	CSID535439	Neobyakangelicol	M-H	C17H16O6	41.6	21	-2.33595	89.7797	http://nonlinear.com/redirect/outbound?p=chemspider&param=535439	0.00025461	1.06133
	2.75_458.2575m/z		458.257	1	2.74857	0.0713833	3	0.415156	1.40127	ZIKV	Ctrl	100 - 62.9	9490.32	18.18	5752.93	5782.76	6025.44	8651.2	7650.92	10113.1	8607.95	10715.2	6913.39	11101.9	6219.85	4898.98	6485.05	8680.8	6626.43	12245.2	10055.5	11218	7664.32	10872.5	x	x	x	x	CSID26384876	Militarinone A	M-H	C26H37NO6	34.6	3.31	5.81747	76.4336	http://nonlinear.com/redirect/outbound?p=chemspider&param=26384876	0.0234252	1.10268
	6.29_785.5701m/z		785.57	1	6.29385	0.214133	1	0.38156	1.40121	ZIKV	Ctrl	100 - 48.3 - 12.4 - 0.951	20945.4	17.28	16792.4	16662.9	11528.4	16955.4	12801.5	18559	22342.4	26751.5	17906.3	19167.9	18155.3	14116.3	12407.7	17013.4	11087.3	22471.7	26099.6	28006.6	19851.2	18771.9	x	x	x	x	CSID4447506	MFCD00057329	2M-H	C23H39NO4	35.6	0	2.01182	80.6161	http://nonlinear.com/redirect/outbound?p=chemspider&param=4447506	0.0151968	1.66398
	6.39_565.2819m/z		565.282	1	6.38663	0.12135	3	0.4019	1.39769	ZIKV	Ctrl	100 - 36	25246.4	9.64	18243.2	20647	16536.3	18523.3	16365.3	20544.4	30600.4	20681.3	21867.7	32538.4	19723.9	17491.5	17797.7	18586.6	14173.9	24875.8	35746.3	21651.6	24242.9	31866.1	x	x	x	x	CSID30790900	(6Z)-4,9,11-Triacetoxy-3a-hydroxy-2,5,8,8,12-pentamethyl-2,3,3a,4,5,8,9,10,11,13a-decahydro-1H-cyclopenta[12]annulen-1-yl benzoate	M-H2O-H	C33H44O9	41.3	16	2.07414	92.8079	http://nonlinear.com/redirect/outbound?p=chemspider&param=30790900	0.0195243	1.76443
	2.27_1069.3978m/z		1069.4	1	2.27083	1.73278	4	0.160143	1.37287	ZIKV	Ctrl	100 - 96.5	37126	5.89	25547.1	29653.7	26959.4	26006.3	27046.7	42481	32835.5	32410.4	38869.2	39033.8	27620.6	25121.7	29015.8	26095.3	23425	51437.2	38357.3	33931	43091.2	38227.3	x	x	x	x	HMDB0135511	6-[4-(2-{[3-(3,4-dimethoxyphenyl)-1-hydroxypropylidene]amino}ethyl)-2-methoxyphenoxy]-3,4,5-trihydroxyoxane-2-carboxylic acid	2M-H	C26H33NO11	33.7	11.2	-5.30947	63.3388	http://nonlinear.com/redirect/outbound?p=hmdb&param=HMDB0135511	0.000721829	2.35321
	3.16_357.2033m/z		357.203	1	3.1621	0.0928	46	0.113186	1.35419	ZIKV	Ctrl	100 - 48.7 - 21.4 - 10.2	7842.65	3.18	5989.82	5880.47	5849.86	5730.71	5506.15	8503.45	7625.81	6760.51	7538.82	8784.64	6475.97	4981.75	6296.08	5750.32	4768.86	10296.2	8908.2	7077.68	8357.68	8603.13	x	x	x	x	HMDB0014343	Oseltamivir	M+FA-H	C16H28N2O4	34.4	5.68	0.628821	67.2055	http://nonlinear.com/redirect/outbound?p=hmdb&param=HMDB0014343	0.000283431	1.07689
	2.12_260.1290n	260.129	259.124	1	2.12072	0.206733	3	0.383662	1.34387	ZIKV	Ctrl	100 - 51.3 - 19.4	14386.7	12.89	11738.6	11461	10933.7	11090.7	8302.75	15136.1	18241.5	12673.9	12147.4	13734.5	12691.4	9709.39	11767.7	11128.7	7190.98	18327.2	21309	13268.5	13466.8	13450.7	x	x	x	x	CSID20162	Diaveridine	M-H2O-H, M-H	C13H16N4O2	34.8	12.8	6.47919	68.709	http://nonlinear.com/redirect/outbound?p=chemspider&param=20162	0.0159792	1.29815
	2.55_777.2968m/z		777.297	1	2.5487	1.48323	4	0.260682	1.32668	ZIKV	Ctrl	100 - 94.3	65931.2	3.29	46920.4	50499.8	50936.7	49553.7	50570.6	79014.1	57700.6	56089.2	65362.5	71489.6	50728.6	42781.9	54822.2	49723.3	43799	95672.4	67403.8	58720.7	72462.1	70012.5	x	x	x	x	HMDB0015286	Gemifloxacin	2M-H	C18H20FN5O4	35.9	24.1	5.38514	61.5446	http://nonlinear.com/redirect/outbound?p=hmdb&param=HMDB0015286	0.00318409	2.86798
	2.09_388.1312m/z		388.131	1	2.09217	0.734433	8	0.260682	1.32649	ZIKV	Ctrl	80.7 - 100	35304.6	4.57	27830.2	27004.5	25101.6	25567.6	27570.8	39729.2	41070.1	32091.2	29250.6	34382	30089	22877.4	27016.3	25655.1	23879	48105.2	47976.6	33596.8	32427.8	33671.6	x	x	x	x	HMDB0014958	Tadalafil	M-H	C22H19N3O4	31.2	6.92	2.39077	51.8645	http://nonlinear.com/redirect/outbound?p=hmdb&param=HMDB0014958	0.00344144	2.10109
	2.45_630.2523m/z		630.252	1	2.44948	0.4492	1	0.320027	1.31905	ZIKV	Ctrl	100 - 90.5	25377.2	2.52	19040.1	19125.1	20072.3	19144.9	18812.5	29777.3	21619.3	20979.3	25042.5	29467.7	20585.4	16202.2	21603.4	19210.4	16293.4	36055.2	25254.9	21963.5	27762.6	28858.9	x	x	x	x	CSID16736543	bluensomycin	M+FA-H	C21H39N5O14	38.9	40.1	8.18632	63.5064	http://nonlinear.com/redirect/outbound?p=chemspider&param=16736543	0.00739708	1.71724
	2.56_729.2703m/z		729.27	1	2.56298	1.16292	2	0.268997	1.31634	ZIKV	Ctrl	100 - 84.9	49103.6	3.88	36792.1	38784.6	38442.4	35155.2	37341.6	56635.8	44156.5	39921	50385.4	54419.4	39778.2	32857.2	41374.8	35275.4	32341.4	68576.2	51582.1	41794	55858.2	53295	x	x	x	x	CSID167280	Gastrin tetrapeptide	M-H	C37H42N6O8S	33.7	0	-1.27678	70.0426	http://nonlinear.com/redirect/outbound?p=chemspider&param=167280	0.0042462	2.44037
	2.97_700.2801m/z		700.28	1	2.97007	0.734033	1	0.140272	1.3091	ZIKV	Ctrl	77.9 - 100 - 21.5 - 28.4	53228.5	2.82	39958.5	41316.7	40366	39381.7	42278.3	57805.3	54219.6	44669.8	54480	54967.7	43201.6	35002.3	43445.1	39516.5	36617.1	69992.2	63337.4	46765.5	60397.5	53832	x	x	x	x	CSID8028321	CP 424391-18	M+FA-H	C32H41N5O10	28.8	0	-5.20013	50.1961	http://nonlinear.com/redirect/outbound?p=chemspider&param=8028321	0.000421508	2.66424
	2.81_808.3150m/z		808.315	1	2.80568	2.3254	1	0.0948445	1.30438	ZIKV	Ctrl	100 - 99.6	89293.6	2.65	65359.9	68949	70026	69397.1	68550.9	96718.9	86572.5	78676.8	88102.3	96397.7	70664.6	58411.5	75367.5	69634.5	59371.6	117110	101131	82368	97672	94406	x	x	x	x	CSID29368490	aclacinomycin Y	M-H	C42H51NO15	43.2	53.4	-4.47212	67.7073	http://nonlinear.com/redirect/outbound?p=chemspider&param=29368490	0.000178154	3.46135
	2.93_756.2911m/z		756.291	1	2.92725	2.3468	1	0.260682	1.29495	ZIKV	Ctrl	63.4 - 100 - 89.8	141297	3.37	103491	110122	113652	109832	108470	166421	129697	119149	143157	148059	111890	93291.7	122322	110207	93945.3	201507	151508	124739	158706	145000	x	x	x	x	CSID4445613	N-{[(2S,3R)-7-Carboxy-3-(2-carboxyethyl)-12-ethyl-2,8,13,18-tetramethyl-17-vinyl-2,3-dihydro-5-porphyrinyl]acetyl}-L-aspartic acid	M+FA-H	C38H41N5O9	27.3	0	3.45865	40.4862	http://nonlinear.com/redirect/outbound?p=chemspider&param=4445613	0.0027321	4.06945
	2.91_771.2978m/z		771.298	1	2.90583	0.86985	4	0.178984	1.28977	ZIKV	Ctrl	100 - 90.1 - 89.6 - 77.3	90906.8	2.21	67852.4	70373.8	71732.2	71042.1	71414.9	104050	83228.4	79136.3	91660.8	96458.5	73359.4	59618.5	77203.9	71285.2	61852.2	125987	97224.5	82849.1	101617	94465.5	x	x	x	x	HMDB0040155	Paradisin C	M+FA-H	C42H46O11	29.7	10.5	-6.11376	45.2493	http://nonlinear.com/redirect/outbound?p=hmdb&param=HMDB0040155	0.00110555	3.31522
	1.85_1075.4004m/z		1075.4	1	1.84995	0.5781	3	0.320027	1.28867	ZIKV	Ctrl	100 - 79.9 - 7.07 - 5.26	13078.2	9.96	9393.18	12190.9	9920.79	8777.2	10461.2	13158	14360.2	11187.6	14185.4	12500.1	10155.6	10327.7	10677.5	8807.23	9060.42	15932	16775.1	11712.4	15726.2	12241.8	x	x	x	x	HMDB0036783	Diosbulbinoside F	2M-H	C26H34O12	40.1	32.2	-2.16331	70.9871	http://nonlinear.com/redirect/outbound?p=hmdb&param=HMDB0036783	0.00746872	1.2072
	3.03_357.2023m/z		357.202	1	3.03432	0.113517	46	0.0948445	1.28492	ZIKV	Ctrl	100 - 37.1 - 19	8102.2	1.75	6144.48	6269.25	6446.69	6340.57	6327.02	8383.12	7852.51	7122.18	8735.75	8417.46	6643.18	5311.12	6938.44	6362.27	5479.81	10150.5	9173.03	7456.32	9684.63	8243.54	x	x	x	x	HMDB0014343	Oseltamivir	M+FA-H	C16H28N2O4	36	5.86	-2.7057	77.4038	http://nonlinear.com/redirect/outbound?p=hmdb&param=HMDB0014343	0.000145636	1.01989
	5.90_989.5002m/z		989.5	1	5.90155	0.556483	2	0.399248	1.2829	ZIKV	Ctrl	100 - 68.7	13362.5	14.31	10152	10156.3	9703.12	9099.86	12967.9	13124.1	16653.4	11681.3	12478.9	12874.6	10976	8604.14	10443.3	9130.99	11231.4	15891.1	19454	12229.3	13834.4	12608.6	x	x	x	x	HMDB0036968	Araliasaponin II	M+FA-H	C47H76O19	38.2	16.1	4.15249	79.6211	http://nonlinear.com/redirect/outbound?p=hmdb&param=HMDB0036968	0.0191221	1.13831
	2.00_630.2024m/z		630.202	1	1.99985	0.6916	1	0.260682	1.27557	ZIKV	Ctrl	100 - 85.3	25482.8	7.59	20749.7	21614.6	18786.7	17995.6	20740.8	28486.3	26715.3	21564.6	24923.2	25724.6	22433.8	18311.3	20219.8	18057.2	17963.5	34492	31207.9	22576.3	27630.3	25193.1	x	x	x	x	CSID9425680	Elagolix	M-H	C32H30F5N3O5	36.2	12.6	-1.49196	70.246	http://nonlinear.com/redirect/outbound?p=chemspider&param=9425680	0.00307253	1.69919
	2.78_729.2802m/z		729.28	1	2.77712	1.87602	42	0.326098	1.26157	ZIKV	Ctrl	100 - 85.9	76430.3	4.4	56596	60028.5	63511.2	60311.3	62471.5	90716.5	69500.3	64883.8	71986.8	85064.3	61189.5	50854.3	68355.8	60517.6	54106.3	109842	81187.8	67927.9	79806	83306.7	x	x	x	x	HMDB0129798	6-(4-{5,7-dihydroxy-3-[(2Z)-4-hydroxy-3-(4-methylpent-3-en-1-yl)but-2-en-1-yl]-6-(3-methylbut-2-en-1-yl)-4-oxo-3,4-dihydro-2H-1-benzopyran-2-yl}-3-hydroxyphenoxy)-3,4,5-trihydroxyoxane-2-carboxylic acid	M+FA-H	C36H44O13	40.2	36.9	5.50267	70.408	http://nonlinear.com/redirect/outbound?p=hmdb&param=HMDB0129798	0.00941533	2.73606
	3.75_683.2603m/z		683.26	1	3.75448	1.54095	9	0.175195	1.26096	ZIKV	Ctrl	100 - 83.9	73157.5	3.02	55669.8	59220	60002.5	56874.9	58319.4	80559.4	70216.3	63269.6	76871.9	74870.4	60188.1	50169.4	64579.5	57069.5	50510.2	97543.6	82024.2	66238	85221.6	73323.5	x	x	x	x	HMDB0013682	Coniferin	2M-H	C16H22O8	31	0	6.80794	62.8849	http://nonlinear.com/redirect/outbound?p=hmdb&param=HMDB0013682	0.000818923	2.88726
	1.71_586.1752m/z		586.175	1	1.71433	0.556483	1	0.320027	1.25243	ZIKV	Ctrl	100 - 80 - 51.2	27457.2	7.14	22136.2	23870	20602.9	20111.6	22895	30632.5	27314.8	22488	27571.8	29278.8	23932.9	20221.9	22174.5	20180.4	19829.2	37090.7	31908.2	23543	30566.6	28673.9	x	x	x	x	CSID5036865	Domperidone Maleate	M+FA-H	C26H28ClN5O6	32.1	0	7.79184	68.9688	http://nonlinear.com/redirect/outbound?p=chemspider&param=5036865	0.00709798	1.66065
	3.50_717.2680m/z		717.268	1	3.50493	1.96205	1	0.260682	1.25077	ZIKV	Ctrl	100 - 86.8	90759.7	3.35	68849.6	73976.5	73917.9	71365.6	74704.3	102740	82860.9	77869.2	92796.9	97531.4	74437.6	62670.6	79556.3	71609.7	64701.1	124400	96795.1	81522.5	102876	95516.2	x	x	x	x	HMDB0136453	N-[2-hydroxy-2-(4-hydroxy-3-methoxyphenyl)ethyl]-3-(4-hydroxy-3-methoxyphenyl)prop-2-enimidic acid	2M-H	C19H21NO6	32.2	0	2.06399	63.6759	http://nonlinear.com/redirect/outbound?p=hmdb&param=HMDB0136453	0.00347125	3.05331
	2.36_342.1322m/z		342.132	1	2.35648	0.392083	15	0.324065	1.23497	ZIKV	Ctrl	83.1 - 100 - 75.5	26646.7	3.31	21285.4	22695.6	21677.6	21476.7	20749	23388.4	29222	24040.5	31474.4	25108.1	23013	19227	23331.2	21550.2	17970.7	28319.3	34136.1	25168.4	34893.1	24589.3	x	x	x	x	HMDB0030251	Oripavine	M+FA-H	C18H19NO3	36.9	55.4	-8.32809	38.3586	http://nonlinear.com/redirect/outbound?p=hmdb&param=HMDB0030251	0.00903467	1.54843
	3.10_681.2670m/z		681.267	1	3.09785	0.5984	14	0.108939	1.23401	ZIKV	Ctrl	100 - 82.7	30013.4	4.04	23222.5	24911.7	24571.5	23400.7	25503.4	31728.4	31675.4	27614.5	30551.7	28497.1	25107.2	21104.5	26445.8	23480.8	22088.4	38417.7	37002.1	28910	33870.2	27908.3	x	x	x	x	HMDB0011668	6-(alpha-D-Glucosaminyl)-1D-myo-inositol	2M-H	C12H23NO10	34	23.7	14.5161	61.2969	http://nonlinear.com/redirect/outbound?p=hmdb&param=HMDB0011668	0.000247293	1.80909
	4.72_613.2701m/z		613.27	1	4.72452	0.477767	3	0.330696	1.22553	ZIKV	Ctrl	100 - 79.2	19849.6	6.76	16191.8	16295.3	14943.1	15648.3	17905.2	18832.2	18223.2	18148	23896.1	20148.5	17505.9	13804.9	16082.9	15701.8	15507.6	22802.6	21287.7	18999.4	26491.7	19732.2	x	x	x	x	HMDB0038582	5-Amino-2,3-dihydro-6-(3-hydroxy-4-methoxy-1-oxobutyl)-2,2-dimethyl-4H-1-benzopyran-4-one	2M-H	C16H21NO5	30.7	0	-10.7151	64.8711	http://nonlinear.com/redirect/outbound?p=hmdb&param=HMDB0038582	0.00982602	1.30911
	3.14_562.2155m/z		562.215	1	3.14068	0.45635	2	0.430668	1.22417	ZIKV	Ctrl	84.5 - 100 - 7.56	27738	2.23	22558.8	23193.7	22469.9	21959.7	23110.9	26040.9	34085.7	22436.5	30010.9	26116.2	24389.7	19649	24183.9	22034.9	20016.2	31531.1	39817.7	23489.2	33270.6	25576.6	x	x	x	x	CSID4445503	3-({[2-(4,4'-Bipiperidin-1-yl)-4-isopropyl-1,3-thiazol-5-yl]carbonyl}amino)-N-(phenylsulfonyl)alanine	M-H	C26H37N5O5S2	33.9	14.7	-1.53023	56.542	http://nonlinear.com/redirect/outbound?p=chemspider&param=4445503	0.0277931	1.46825
	1.95_545.1818m/z		545.182	1	1.94988	1.15507	4	0.178984	1.22408	ZIKV	Ctrl	100 - 92.2	57161	3.1	44880.8	48662.7	46726.7	45833.2	47381.8	54817.5	57334.5	50499.7	62180	60973.4	48523.4	41225.6	50291	45990.1	41037.2	66374.5	66976.1	52869	68933.9	59713.6	x	x	x	x	CSID5256697	kanamycin A 3'-phosphate	M-H2O-H	C18H37N4O14P	37.8	36.7	-8.46317	61.4935	http://nonlinear.com/redirect/outbound?p=chemspider&param=5256697	0.00107701	2.38872
	0.84_663.2005m/z		663.201	1	0.844483	0.392267	2	0.459547	1.21657	ZIKV	Ctrl	100 - 61.9	21092.1	12.58	14643.4	21207.1	15668.6	17360.6	17807.1	19455.4	24818.5	20697.5	22483.2	18006.1	15831.9	17966	16863.8	17420	15422.6	23557.1	28992.1	21668.5	24925.3	17634.1	x	x	x	x	CSID388717	Tos-Arg-CH2Cl	2M-H	C13H21ClN4O2S	32.6	18.6	-10.4067	55.9156	http://nonlinear.com/redirect/outbound?p=chemspider&param=388717	0.0467925	1.22652
	1.89_658.2593m/z		658.259	1	1.88565	2.68178	2	0.260682	1.21375	ZIKV	Ctrl	89.8 - 100 - 4.42 - 1.22	121646	5.35	92897.1	104107	101042	96935.4	106133	134555	107967	115841	124332	125531	100437	88196.6	108750	97267.1	91920.9	162923	126124	121276	137837	122938	x	x	x	x	CSID30791243	[N'-{5-[Acetyl(hydroxy-kappaO)amino]pentyl}-N-[5-({4-[(5-aminopentyl)(hydroxy-kappaO)amino]-4-oxobutanoyl}amino)pentyl]-N-(hydroxy-kappaO)succinamidato(3-)]iron	M+FA-H	C25H45FeN6O8	28.8	46.7	-6.08777	4.20728	http://nonlinear.com/redirect/outbound?p=chemspider&param=30791243	0.00261137	3.35795
	4.75_727.3314m/z		727.331	1	4.74593	0.884367	4	0.260682	1.21152	ZIKV	Ctrl	100 - 70.4	21173	6.68	16261.9	18055.2	19168.6	17276.1	16620.3	23103.6	21691.6	19173.4	22163.9	19732.5	17581.8	15295.8	20630.7	17335.2	14394.8	27974.4	25339.3	20072.9	24571.4	19324.8	x	x	x	x	CSID2795	cyclofenil	2M-H	C23H24O4	33.8	3.4	5.177	71.7068	http://nonlinear.com/redirect/outbound?p=chemspider&param=2795	0.00322455	1.38887
	2.01_752.2821m/z		752.282	1	2.01435	2.50407	1	0.260682	1.20633	ZIKV	Ctrl	95.8 - 100 - 88.4 - 51	189243	4.47	147314	161141	163980	151800	160140	207498	179196	167479	196230	195811	159270	136513	176488	152319	138697	251245	209331	175337	217544	191766	x	x	x	x	HMDB0035904	Phyllanthusol B	M-H2O-H	C35H49NO18	41.8	72.4	6.43459	43.8163	http://nonlinear.com/redirect/outbound?p=hmdb&param=HMDB0035904	0.00255945	4.12815
	2.08_677.2465m/z		677.246	1	2.0779	1.4549	9	0.208659	1.20353	ZIKV	Ctrl	100 - 89.3	61342.1	4.52	48163.3	54551.9	50843.6	50251.2	51033.4	66482	58104.9	55280.3	63814.5	63028.9	52072.3	46214.7	54722	50423.2	44199.8	80498.2	67876.1	57873.8	70746	61726.6	x	x	x	x	HMDB0013200	5-Hydroxytryptophol glucuronide	2M-H	C16H21NO7	35.6	31.7	-14.5257	61.3624	http://nonlinear.com/redirect/outbound?p=hmdb&param=HMDB0013200	0.00153269	2.36626
	4.22_725.2683m/z		725.268	1	4.21818	2.4396	3	0.260682	1.20181	ZIKV	Ctrl	100 - 90.7	96841.3	3.88	75712.4	82343.4	82948.4	79146.6	82746.4	106152	93493.6	85450	102880	96230.6	81857.3	69758.8	89275.7	79417.4	71666.3	128532	109216	89458.9	114055	94242.3	x	x	x	x	CSID139688	Antazoline Phosphate	2M-H	C17H22N3O4P	30.6	0	8.20181	61.9072	http://nonlinear.com/redirect/outbound?p=chemspider&param=139688	0.00251798	2.92476
	3.35_723.2712m/z		723.271	1	3.3479	2.6747	12	0.260682	1.18746	ZIKV	Ctrl	100 - 86.3	103357	4.18	81316.1	88262.6	90590.5	85840.8	89191.9	115148	99335	94168.5	104903	103229	87915.9	74773.4	97500.7	86134.5	77248.7	139425	116040	98586.5	116298	101096	x	x	x	x	HMDB0031366	Gibberellin A93	2M-H	C19H22O7	31.1	0	7.39812	63.6218	http://nonlinear.com/redirect/outbound?p=hmdb&param=HMDB0031366	0.00214511	2.93781
	3.76_705.2809m/z		705.281	1	3.76162	0.300217	2	0.383662	1.17876	ZIKV	Ctrl	100 - 66.7 - 67.6 - 47.5 - 57.9 - 42.5	35768.1	4.82	29431.7	31179.1	30823.9	28308.3	31975.9	39919.6	38216.1	30137.1	35946.5	34621.1	31820.5	26414	33175.1	28405.1	27694.2	48335.7	44642.7	31551	39851	33905.7	x	x	x	x	HMDB0032337	Hydroxypropyl cellulose	M-H2O-H	C20H38O15.[C8H14O6]n	28	42.3	-1.8392		http://nonlinear.com/redirect/outbound?p=hmdb&param=HMDB0032337	0.0162421	1.58519
	3.19_401.2112m/z		401.211	1	3.19065	0.2215	7	0.175732	1.15351	ZIKV	Ctrl	100 - 12.4	14503.4	3.96	12921	13259.4	11677.1	12542.3	12466.7	14939.9	15068.2	14617.8	13648.9	14242.5	13969.7	11233	12567.8	12585.2	10797.4	18089.6	17602.1	15303.6	15131.4	13948.2	x	x	x	x	HMDB0240212	(alpha-keto-dimethyl-delta-N,N-Dimethylguanidynol) valeric acid	2M-H	C8H15N3O3	37.6	2.41	-10.497	97.0062	http://nonlinear.com/redirect/outbound?p=hmdb&param=HMDB0240212	0.000890309	1.03859
	1.04_657.1997m/z		657.2	1	1.04365	0.563417	3	0.332271	1.1526	ZIKV	Ctrl	100 - 77.4 - 55.8	18448.2	6.17	14846.6	17683.8	15552.8	15159	16786.6	17728.3	17870.2	18916.9	20233.9	17491.8	16051.6	14981.2	16739.2	15210.9	14538.8	21466	20875.4	19804.4	22431.7	17130.4	x	x	x	x	HMDB0030542	Neohesperidin dihydrochalcone	M+FA-H	C28H36O15	33.7	16.5	-6.34362	59.2057	http://nonlinear.com/redirect/outbound?p=hmdb&param=HMDB0030542	0.0100115	1.0865
	2.61_372.1524m/z		372.152	1	2.61295	0.3921	8	0.320027	1.14563	ZIKV	Ctrl	100 - 98.8	20922.2	4.24	18791.4	19230.3	18277.8	17364.5	17649.2	19706.3	22960	19541.7	22281.6	20121.6	20316.5	16291.4	19672	17423.9	15285.9	23860.9	26821.1	20458.5	24701.8	19705.8	x	x	x	x	HMDB0032383	N1-(2-Methoxy-4-methylbenzyl)-n2-(2-(pyridin-2-yl) ethyl)oxalamide	M+FA-H	C18H21N3O3	31.1	8.86	-12.6407	59.9476	http://nonlinear.com/redirect/outbound?p=hmdb&param=HMDB0032383	0.00810127	1.13808
	4.23_625.2664m/z		625.266	1	4.23245	0.7207	1	0.459547	1.13975	ZIKV	Ctrl	100 - 87.3	23506.8	6.04	19488.4	21166.9	19802.7	20119	22545.7	27441.1	24317.2	23139.3	20611.6	22024.6	21070.1	17932	21313.3	20187.9	19526.7	33226.4	28406.5	24224.9	22850.4	21569.5	x	x	x	x	CSID30791519	3-{(2Z,3S,4S)-5-[(2Z,5R)-2-[(3-Ethyl-5-formyl-4-methyl-1H-pyrrol-2-yl)methylene]-5-(methoxycarbonyl)-3-methyl-4-oxo-1,2,4,5-tetrahydrocyclopenta[b]pyrrol-6-yl]-3-methyl-2-[(3-methyl-5-oxo-4-vinyl-2,5-dihydro-1H-pyrrol-2-yl)methylene]-3,4-dihydro-2H-pyrrol-4-yl}propanoic acid	M-H	C35H38N4O7	35.5	7.45	-0.576232	70.6024	http://nonlinear.com/redirect/outbound?p=chemspider&param=30791519	0.049543	1.06661
	2.94_665.2566m/z		665.257	1	2.94152	0.7485	88	0.260682	1.13487	ZIKV	Ctrl	100 - 81.2	36012.7	4.81	30618.7	33125	31037.2	30254.8	33628.4	37851.8	33439	35420.6	37302	36049.9	33103.8	28062.5	33404.7	30358.3	29125.4	45832	39062.2	37082.4	41353.7	35305.1	x	x	x	x	HMDB0129700	3,4,5-trihydroxy-6-[3-hydroxy-4-(7-hydroxy-3-{[3-methyl-3-(4-methylpent-3-en-1-yl)oxiran-2-yl]methyl}-8-(3-methylbut-2-en-1-yl)-4-oxo-4H-chromen-2-yl)phenoxy]oxane-2-carboxylic acid	M-H	C36H42O12	34.4	6.21	-5.57445	72.2259	http://nonlinear.com/redirect/outbound?p=hmdb&param=HMDB0129700	0.0032843	1.49804
	2.63_517.1838m/z		517.184	1	2.63437	1.42635	15	0.266761	1.13463	ZIKV	Ctrl	100 - 88.8	76889.3	4.02	64358.3	71498.9	66546.2	67162.6	69265	75261.4	76930.2	70609	82622.1	79023.9	69581.7	60571.7	71622.4	67392.4	59990.2	91128.6	89867.2	73921.6	91596.5	77391.2	x	x	x	x	HMDB0001534	5-Formiminotetrahydrofolic acid	M+FA-H	C20H24N8O6	36.6	27.2	7.81595	64.5848	http://nonlinear.com/redirect/outbound?p=hmdb&param=HMDB0001534	0.00414161	2.16682
	6.07_585.3024m/z		585.302	1	6.06522	0.349467	9	0.320027	1.12386	ZIKV	Ctrl	100 - 48.3	22277.4	4.43	20841.8	20332.9	19301.1	18607.4	20027.7	21413.3	22845	20886.5	21874.1	24368.1	22533.4	17225.4	20773.4	18671.1	17345.9	25927.9	26686.7	21866.4	24250.1	23864.7	x	x	x	x	HMDB0015480	Ciclesonide	M+FA-H	C32H44O7	35.4	0	-8.28192	86.1395	http://nonlinear.com/redirect/outbound?p=hmdb&param=HMDB0015480	0.00875208	1.09306
	2.10_427.1279m/z		427.128	1	2.0993	0.820083	31	0.3919	1.11733	ZIKV	Ctrl	100 - 83.5 - 64.3	42895.2	5.13	37527.9	41012.4	36259.6	35874.3	41280.4	40267	46048.6	41734.3	43921.8	42504.1	40573.7	34744.5	39025.5	35997	35752.8	48756.4	53792.3	43692.3	48692.6	41625.9	x	x	x	x	HMDB0035007	Lucuminic acid	M-H2O-H	C19H26O12	30.3	9.03	7.38894	50.6759	http://nonlinear.com/redirect/outbound?p=hmdb&param=HMDB0035007	0.0180441	1.43877
	1.79_341.0974m/z		341.097	1	1.79285	0.677333	19	0.370785	1.1161	ZIKV	Ctrl	100 - 81 - 83.4 - 55.2	42068.6	4.02	38364.8	40255.4	34430.4	35755	39656.3	41286.7	43884.7	43897	40820.7	40454.1	41478.5	34103.2	37056.8	35877.3	34346.1	49991.1	51264.6	45956.5	45254.6	39618.2	x	x	x	x	CSID139018	3-(beta-D-Glucopyranosyloxy)-2-hydroxy-4-methoxy-1-methyl-6-oxo-1,2,3,6-tetrahydro-3-pyridinecarbonitrile	M-H2O-H	C14H20N2O9	35.4	44.6	-4.43708	37.5305	http://nonlinear.com/redirect/outbound?p=chemspider&param=139018	0.0132465	1.44654
	1.04_342.1047m/z		342.105	1	1.04365	0.277667	12	0.444024	1.11288	ZIKV	Ctrl	51.8 - 88.5 - 100 - 82.5 - 72.6	25445	4.47	21785.5	23364.7	21921.2	23025.3	24223.4	23412	23387.8	25849.4	27986.7	26589.1	23553.7	19793.8	23593.3	23104.1	20979.8	28348	27320.8	27062.1	31026.6	26039.7	x	x	x	x	HMDB0005862	2-Methylguanosine	M+FA-H	C11H15N5O5	28	27.8	-2.62871	15.3286	http://nonlinear.com/redirect/outbound?p=hmdb&param=HMDB0005862	0.0325105	1.04806
	6.43_585.2956m/z		585.296	1	6.42947	1.22722	6	0.45166	1.06781	ZIKV	Ctrl	100 - 66.4	56377.6	1.75	52510.5	53465.7	47925.9	53903.6	56182.1	55929.6	57978.2	55801	56643.1	55535.8	56772.4	45294.5	51581.7	54088	48659.1	67721.1	67728.1	58419	62795.7	54388.3	x	x	x	x	HMDB0005035	Ondansetron	2M-H	C18H19N3O	33.2	0	-4.76065	71.54	http://nonlinear.com/redirect/outbound?p=hmdb&param=HMDB0005035	0.0407179	1.22828
	5.61_393.1934m/z		393.193	1	5.60888	1.36192	50	0.440301	1.13853	Ctrl	ZIKV	100 - 24.5 - 3.5 - 0.75	329740	5.52	350691	345397	313311	310474	328827	291041	309017	316754	246409	284880	379154	292610	337210	311536	284795	352401	360982	331614	273174	278994	x	x	x	x	HMDB0030082	5-(2,3-Dihydroxy-3-methylbutyl)-4-(3,4-epoxy-4-methylpentanoyl)-3,4-dihydroxy-2-isopentanoyl-2-cyclopenten-1-one	M-H2O-H	C21H32O8	38.8	0	3.72021	98.4372	http://nonlinear.com/redirect/outbound?p=hmdb&param=HMDB0030082	0.0303573	4.20639
	5.35_407.1729m/z		407.173	1	5.34527	0.264317	51	0.459547	1.19697	Ctrl	ZIKV	100 - 19.6	66849.2	11.79	72112.3	72718.6	69875.7	53565.8	65973.4	52223.8	66812.7	53527.7	48979.2	57699.1	77965.1	61605	75205.8	53749	57139.3	63234	78048.3	56039	54299.3	56506.9	x	x	x	x	HMDB0039084	3-O-Methylniveusin A	M-H	C21H28O8	41.4	18.8	4.22048	93.3278	http://nonlinear.com/redirect/outbound?p=hmdb&param=HMDB0039084	0.0494374	2.11386
	1.04_379.1021m/z		379.102	1	1.04365	0.156333	37	0.45166	1.2365	Ctrl	ZIKV	100 - 23.2 - 27.8 - 19.1	14445.8	13.18	12638.3	13180.2	13477.5	16984.7	15948.4	10867.8	9244.75	13657.2	12204.7	12439.9	13664	11165.9	14505.5	17042.8	13812.9	13159	10799.4	14297.9	13530.3	12182.9	x	x	x	x	HMDB0029404	(S)-a-Amino-2,5-dihydro-5-oxo-4-isoxazolepropanoic acid N2-glucoside	M+FA-H	C12H18N2O9	36.3	21.4	8.09616	69	http://nonlinear.com/redirect/outbound?p=hmdb&param=HMDB0029404	0.0418304	1.06961
	2.04_239.0557m/z		239.056	1	2.0422	0.32095	48	0.347078	1.25164	Ctrl	ZIKV	100 - 26.2	11108.5	9.77	10923.9	12338.2	9545.08	10827.4	11907.9	8621.01	7895.69	10579.7	9228.84	8050.47	11810.5	10452.5	10273.2	10864.5	10313.4	10438.6	9223.46	11076.1	10231.3	7884.13	x	x	x	x	HMDB0132101	2-benzyl-2,3-dihydroxybutanedioic acid	M-H	C11H12O6	38.3	6.08	-1.73823	87.5005	http://nonlinear.com/redirect/outbound?p=hmdb&param=HMDB0132101	0.0114145	1.03469
	4.19_187.0938m/z		187.094	1	4.18962	0.149917	54	0.260682	1.30082	Ctrl	ZIKV	100 - 10 - 0.916	24633.7	9.18	26790.8	20788.9	26444.9	23421.3	25722.4	20177	20448.4	19537.9	16193.5	18328.6	28965.2	17611.7	28462.1	23501.4	22278.1	24430.9	23887.1	20454.5	17952.5	17949.9	x	x	x	x	CSID1664	4-Aminopyridine	2M-H	C5H6N2	38.7	22.5	-27.1953	95.8613	http://nonlinear.com/redirect/outbound?p=chemspider&param=1664	0.00341837	1.73037
	2.33_249.0784m/z		249.078	1	2.32793	0.4494	27	0.320027	1.31753	Ctrl	ZIKV	100 - 52.6 - 62 - 25.2 - 32.5	8963.21	8.79	9568.76	9654.49	8245.4	7981.52	9365.85	6756.71	6781.25	8653.4	6067.25	5756.5	10345.4	8178.99	8874.36	8008.83	8111.72	8181.21	7921.62	9059.37	6726.28	5637.56	x	x	x	x	HMDB0015302	Moclobemide	M-H2O-H	C13H17ClN2O2	30.2	1.02	-5.85345	56.5179	http://nonlinear.com/redirect/outbound?p=hmdb&param=HMDB0015302	0.00807366	1.03421
	3.11_144.0416m/z		144.042	1	3.105	0.0928	14	0.373784	1.32451	Ctrl	ZIKV	100 - 10.1	8713.05	8.62	9221.63	8523.5	9554.82	7593.19	8672.1	7986.99	6234.62	7661.32	5983.6	5025.11	9970.07	7220.85	10283.7	7619.17	7510.87	9670.87	7283.06	8020.76	6633.54	4921.28	x	x	x	x	HMDB0062406	4-Oxo-1-(3-pyridyl)-1-butanone	M-H2O-H	C9H9NO2	42.6	36.2	-23.588	99.0062	http://nonlinear.com/redirect/outbound?p=hmdb&param=HMDB0062406	0.014209	1.01576
	6.81_328.2209n	328.221	327.215	1	6.80752	0.3502	4	0.320027	1.33262	Ctrl	ZIKV	100 - 16.6	22536.1	8.32	21744.7	21250.3	28723.4	22091.9	18870.4	18501.4	16815.3	17263.4	17319.9	14655.5	23509.6	18002.6	30914.4	22167.4	16343.6	22402	19643	18073.3	19201.2	14352.7	x	x	x	x	CSID7827805	2,3-dinor-8-epi-prostaglandin F1alpha	M-H2O-H, M-H	C18H32O5	41.7	27.2	-12.531	94.6122	http://nonlinear.com/redirect/outbound?p=chemspider&param=7827805	0.00750789	1.63561
	8.68_340.2228n	340.223	321.205	1	8.67657	0.128733	1	0.383662	1.34077	Ctrl	ZIKV	100 - 21.8 - 3.31 - 0.0174	25525.9	11.26	23306.9	27875	26489.5	28225.2	21732.7	19830.4	17085.7	18153.9	25116.5	15004.8	25198.6	23614.9	28510.1	28321.7	18822.6	24011.2	19958.9	19005.6	27844.7	14694.8	x	x	x	x	CSID392004	terguride	M-H2O-H, M-H	C20H28N4O	37.4	0	-10.1981	98.1546	http://nonlinear.com/redirect/outbound?p=chemspider&param=392004	0.0164793	1.73643
	3.56_401.1254m/z		401.125	1	3.56133	0.08495	72	0.339638	1.37039	Ctrl	ZIKV	100 - 15.9	10173.1	12.13	11329	10688.4	9912.6	7531.16	11404.4	8267.2	6914.24	8459.31	7100.37	6376.4	12248.5	9054.88	10668.7	7556.93	9877.32	10010.2	8076.98	8856.18	7871.61	6244.65	x	x	x	x	HMDB0135762	3,4,5-trihydroxy-6-{3-[2-(2-hydroxyphenyl)ethyl]-5-methoxyphenoxy}oxane-2-carboxylic acid	M-H2O-H	C21H24O9	39.6	11	2.9424	90.2354	http://nonlinear.com/redirect/outbound?p=hmdb&param=HMDB0135762	0.0108296	1.15601
	13.30_475.3428m/z		475.343	1	13.3041	0.179033	13	0.427802	1.40753	Ctrl	ZIKV	100 - 20.2 - 5.18	10944.1	16.7	9752.7	14528.7	9097.62	8776.65	12564.8	6141.7	7180.27	8180.19	7714.09	9660.71	10544.3	12308.2	9791.58	8806.68	10882.4	7436.54	8387.74	8563.97	8551.99	9461.1	x	x	x	x	HMDB0035513	Schleicherastatin 6	M+FA-H	C28H46O3	53.6	76.5	-0.188384	91.6754	http://nonlinear.com/redirect/outbound?p=hmdb&param=HMDB0035513	0.0271238	1.15672
	5.54_285.1104m/z		285.11	1	5.5382	0.142267	62	0.45166	1.42705	Ctrl	ZIKV	100 - 19.2 - 3.96	10008	17.72	11757.9	10041	9399.56	7364.87	11476.5	6921.32	4414.13	9759.45	7453.73	6516.76	12712.2	8506.47	10116.6	7390.07	9939.78	8380.53	5156.43	10217.3	8263.35	6382.11	x	x	x	x	HMDB0130120	5-hydroxy-8-(2-hydroxypropan-2-yl)-4-propyl-2H,8H,9H-furo[2,3-h]chromen-2-one	M-H2O-H	C17H20O5	43.5	29.4	-9.39295	98.3927	http://nonlinear.com/redirect/outbound?p=hmdb&param=HMDB0130120	0.0406682	1.13037
	2.72_467.0652m/z		467.065	1	2.72002	0.0928	8	0.45166	1.43514	Ctrl	ZIKV	100 - 29.4 - 34.9	15583.1	22.4	15552	11902.9	21646	15988.6	12826	8933.76	14520.7	8375.3	11464.1	10997.2	16814.2	10083.8	23297.2	16043.3	11108.5	10817.2	16962.6	8768.23	12709.3	10770	x	x	x	x	HMDB0128870	3,4,5-trihydroxy-6-({11-hydroxy-13-oxo-6,8,20-trioxapentacyclo[10.8.0.0虏,鈦?0鲁,鈦?0鹿鈦?鹿鈦筣icosa-1(12),2(9),4,10,14(19),15,17-heptaen-15-yl}oxy)oxane-2-carboxylic acid	M-H2O-H	C23H18O12	34.4	0	6.52921	79.2984	http://nonlinear.com/redirect/outbound?p=hmdb&param=HMDB0128870	0.0364148	1.38294
	1.05_182.0422m/z		182.042	1	1.05078	0.3921	23	0.45166	1.44179	Ctrl	ZIKV	100 - 12.1	14897	17.62	15516.1	17308.6	12672.2	9908.14	19080	11734.6	8551.85	8495.15	10368.1	12511.9	16775.4	14663.3	13638.9	9942.04	16525.1	14208.5	9989.97	8893.7	11494.3	12253.4	x	x	x	x	HMDB0000017	4-Pyridoxic acid	M-H	C8H9NO4	42.3	34.9	-20.3206	96.4845	http://nonlinear.com/redirect/outbound?p=hmdb&param=HMDB0000017	0.037613	1.38565
	1.04_245.0108m/z		245.011	1	1.03652	0.1135	26	0.383662	1.45432	Ctrl	ZIKV	100 - 7.45	8716.49	10.27	8882.92	9477.02	9134.23	7173.04	8915.24	6406.67	4024.08	6456.55	4887.75	8192.47	9603.88	8028.65	9830.99	7197.58	7721.45	7757.38	4700.79	6759.46	5418.65	8023.2	x	x	x	x	HMDB0130016	2-[4-(sulfooxy)phenyl]propanoic acid	M-H	C9H10O6S	37.4	3.8	-6.89346	91.1527	http://nonlinear.com/redirect/outbound?p=hmdb&param=HMDB0130016	0.0166852	1.14704
	9.93_350.2441n	350.244	349.236	1	9.9266	0.143267	13	0.320027	1.50715	Ctrl	ZIKV	100 - 23.2 - 5.51 - 0.286	15252.8	12.39	13351.3	16269.8	14929.4	17955.4	13758.3	12215.9	6813.2	10404.7	12193.6	8974.23	14434.9	13783.3	16068.2	18016.9	11916	14791.4	7958.94	10892.8	13518	8788.81	x	x	x	x	HMDB0041997	Pregnanetriolone	M-H2O-H, M-H	C21H34O4	40.7	10.4	-4.57738	98.2729	http://nonlinear.com/redirect/outbound?p=hmdb&param=HMDB0041997	0.00816144	1.62216
	1.02_152.0296n	152.03	151.022	1	1.0158	0.127783	6	0.459547	1.57737	Ctrl	ZIKV	100 - 9.17 - 1.01	31211.6	27.39	45028.2	30125.1	32012	22433.5	26459	26185.7	14237	22097.8	11216.8	25198.2	48682.8	25521	34453.9	22510.3	22916	31706.4	16631.2	23134.6	12435.2	24677.6	x	x	x	x	HMDB0001182	6,8-Dihydroxypurine	M-H, M+FA-H	C5H4N4O2	41.2	31.9	-24.8809	97.6718	http://nonlinear.com/redirect/outbound?p=hmdb&param=HMDB0001182	0.0463835	2.15426
	4.79_583.1864m/z		583.186	1	4.78897	0.107283	21	0.405127	1.67499	Ctrl	ZIKV	100 - 48.9	6164.07	18.81	6371.66	5120.35	7304.71	4808.71	7214.92	5061.51	5377.21	3054.58	2290.12	2616.92	6888.8	4337.81	7861.91	4825.17	6248.81	6128.62	6281.47	3197.88	2538.87	2562.85	x	x	x	x	HMDB0015067	Tipranavir	M-H2O-H	C31H33F3N2O5S	36.5	3.51	-3.27806	82.8641	http://nonlinear.com/redirect/outbound?p=hmdb&param=HMDB0015067	0.0200075	1.07256
	10.63_456.3232n	456.323	455.316	1	10.6337	0.213717	1	0.383662	2.06075	Ctrl	ZIKV	100 - 25.5	39784.9	30.54	22872.1	54120.1	43838.6	45430.1	32663.6	20372.2	12029.9	20688.5	32753.8	10686	24728.5	45848.9	47182.6	45585.6	28289.8	24667.2	14052.9	21659.1	36311.5	10465.2	x	x	x	x	CSID4581330	callystatin A	M-H, M+FA-H	C29H44O4	38.3	3.05	-1.59056	90.5813	http://nonlinear.com/redirect/outbound?p=chemspider&param=4581330	0.016796	3.08898
	6.54_299.1836m/z		299.184	1	6.54388	0.13535	19	0.456181	2.34331	Ctrl	ZIKV	100 - 12.8 - 0.949	5869.12	46.91	11884.2	3703.68	2915.59	6350.27	4491.87	3090.62	2216.5	4078.5	910.254	2227.25	12848.7	3137.64	3137.99	6372	3890.39	3742.21	2589.24	4269.84	1009.13	2181.23	x	x	x	x	HMDB0035780	8-Hydroxy-4(6)-lactarene-5,14-diol	M+FA-H	C15H26O3	39.1	11.5	-11.125	95.8473	http://nonlinear.com/redirect/outbound?p=hmdb&param=HMDB0035780	0.0450079	1.10892
	3.62_302.1694n	302.169	301.163	1	3.61845	0.206717	7	0.427802	2.42744	Ctrl	ZIKV	100 - 17.6 - 2.62	114551	27.46	92631.6	77949.4	157395	112914	131863	7739.31	13936.7	154414	40580.4	19280	100150	66036.4	169401	113300	114206	9370.97	16280.4	161658	44988.2	18881.6	x	x	x	x	HMDB0028791	Glutaminylarginine	M-H2O-H, M-H	C11H22N6O4	41.7	15.2	-2.93156	96.5717	http://nonlinear.com/redirect/outbound?p=hmdb&param=HMDB0028791	0.0269396	5.11838
	4.18_544.1419m/z		544.142	1	4.17535	0.0785167	2	0.414306	2.44041	Ctrl	ZIKV	100 - 32.6 - 9.96	11040.2	32.76	12312.5	4602.83	12673.4	12372.9	13239.7	2003.17	2187.51	10064	3477.21	4887.79	13311.8	3899.38	13640.1	12415.2	11466.8	2425.49	2555.37	10536.1	3854.9	4786.8	x	x	x	x	CSID134000	Esorubicin Hydrochloride	M-H2O-H	C27H29ClNO10	33.6	0	6.96999	76.0711	http://nonlinear.com/redirect/outbound?p=chemspider&param=134000	0.022166	1.73208
	0.92_146.0422m/z		146.042	1	0.915867	0.0999333	30	0.330696	2.58257	Ctrl	ZIKV	100 - 3.43	3861.5	25.29	6756.63	2467.5	4121.92	4084.59	1876.87	1580.61	838.412	1558.43	1743.79	1754.85	7305.01	2090.39	4436.34	4098.57	1625.55	1913.84	979.403	1631.54	1933.2	1718.59	x	x	x	x	HMDB0002931	N-Acetylserine	M-H	C5H9NO4	38.6	19.8	-25.11	96.6636	http://nonlinear.com/redirect/outbound?p=hmdb&param=HMDB0002931	0.00976337	1.02253
	11.43_453.3006m/z		453.301	1	11.4269	0.150417	8	0.38156	2.6215	Ctrl	ZIKV	100 - 27 - 14.6	21096.6	36.39	9114.08	29870.7	24861.2	21484.3	20152.5	9137.52	3895.88	7921.05	15455.6	3827.56	9853.8	25305.5	26757.6	21557.9	17454	11064	4551.03	8292.67	17134.4	3748.47	x	x	x	x	HMDB0039148	Ganodosterone	M+FA-H	C28H40O2	49.9	60.4	-0.994139	90.3716	http://nonlinear.com/redirect/outbound?p=hmdb&param=HMDB0039148	0.0150875	2.49727
	3.55_493.0791m/z		493.079	1	3.5542	0.0706833	9	0.373507	2.75754	Ctrl	ZIKV	100 - 23.6 - 13.7	6014.55	41.09	7107.99	2973.2	8282.92	3758.2	7950.43	2229.97	795.24	3533.74	1593.71	2752.99	7684.88	2518.81	8914.74	3771.06	6885.83	2700.11	928.971	3699.53	1766.81	2696.11	x	x	x	x	HMDB0127812	3,4,5-trihydroxy-6-{[3-hydroxy-2-(3-methoxyphenyl)-5-sulfino-3,4-dihydro-2H-1-benzopyran-7-yl]oxy}oxane-2-carboxylate	M-H2O-H	C22H24O12S	38.1	0.332	-3.81478	94.4987	http://nonlinear.com/redirect/outbound?p=hmdb&param=HMDB0127812	0.0137008	1.35021
	2.81_1170.9191m/z		1170.92	1	2.80568	0.150117	1	0.370393	19.1725	Ctrl	ZIKV	100 - 70.4 - 12.3 - 0.496	18521.5	96.01	6445.69	17821.5	14403.4	48863.8	5072.98	0	0	2289.92	2530.63	9.66261	6968.83	15097.8	15502.1	49031	4393.69	0	0	2397.35	2805.51	9.46296	x	x	x	x	CSID13134960	Macitentan	2M-H	C19H20Br2N6O4S	24	0	-0.192512	20.2064	http://nonlinear.com/redirect/outbound?p=chemspider&param=13134960	0.013158	2.61765
	2.13_221.0089m/z		221.009	1	2.12787	0.128683	7	0.443381	28.3859	Ctrl	ZIKV	100 - 9.8 - 6.95	5139.33	88.27	869.763	22915.5	562.008	844.277	505.073	37.3545	183.315	5.35305	326.476	352.762	940.355	19413.3	604.878	847.166	437.442	45.2299	214.142	5.6042	361.938	345.473	x	x	x	x	HMDB0000192	L-Cystine	M-H2O-H	C6H12N2O4S2	36.5	0	12.2475	95.7475	http://nonlinear.com/redirect/outbound?p=hmdb&param=HMDB0000192	0.0313435	1.07513
pos	2.49_1090.0160m/z		1090.02	1	2.49098	0.163467	4	0.00591773	Infinity	ZIKV	Ctrl	100 - 73.7 - 7.14	10339.9	116.79	0	0	0	0	0	7624.55	8938.77	196.04	31060.4	3879.68	0	0	0	0	0	10207.5	13865.1	210.083	35657.2	3945.3	x	x	x	x	HMDB0002181	Phytoene	2M+H	C40H64	34.9	0	6.54798	81.8779	http://nonlinear.com/redirect/outbound?p=hmdb&param=HMDB0002181	5.00888e-06	2.86079
	2.51_1039.9919m/z		1039.99	1	2.50527	0.08495	3	0.349682	Infinity	ZIKV	Ctrl	100 - 15	1280.81	115.37	0	0	0	0	0	1057.04	1160.12	0	3782.78	404.12	0	0	0	0	0	1415.13	1799.49	0	4342.61	410.955	x	x	x	x	HMDB0046982	TG(22:0/o-18:0/24:0)	M+Na	C67H132O5	29.8	0	-4.72251	54.4287	http://nonlinear.com/redirect/outbound?p=hmdb&param=HMDB0046982	0.00454875	1.16889
	2.65_989.9787m/z		989.979	1	2.64732	0.135633	5	0.0274219	2310.86	ZIKV	Ctrl	100 - 16.8	2827.21	117.17	0	6.11723	0	0	0	977.833	1702.57	106.107	8466.3	2883.25	0	5.44372	0	0	0	1309.1	2640.9	113.707	9719.26	2932.01	x	x	x	x	HMDB0046233	TG(20:0/o-18:0/24:0)	M+H	C65H128O5	30.2	0	-4.7909	56.5024	http://nonlinear.com/redirect/outbound?p=hmdb&param=HMDB0046233	3.16505e-05	1.56966
	2.71_1041.6033m/z		1041.6	1	2.71157	0.0999333	1	0.349682	802.727	ZIKV	Ctrl	100 - 56 - 19.2 - 4.77	4664.03	111.46	8.46521	2.86485	0	15.9197	1.80145	13218	113.686	51.2429	264.808	9672.46	12.645	2.54943	0	15.8461	1.72405	17695.9	176.34	54.9136	303.998	9836.05	x	x	x	x	HMDB0116817	CL(8:0/8:0/8:0/18:2(9Z,11Z))	M+H	C51H94O17P2	39.6	0	-0.617404	98.6904	http://nonlinear.com/redirect/outbound?p=hmdb&param=HMDB0116817	0.00322985	1.46076
	2.57_919.5394m/z		919.539	1	2.5688	0.0706667	4	0.349682	206.202	ZIKV	Ctrl	100 - 51.1 - 6.06	2836.19	89.97	16.6067	1.80431	19.4241	30.0214	0.915653	4217.98	191.675	139.368	181.516	9450.43	24.8064	1.60565	19.6818	29.8828	0.876312	5646.92	297.311	149.351	208.379	9610.26	x	x	x	x	CSID4444064	Macrocin	M+NH4	C45H75NO17	41.8	20.6	2.34828	91.2016	http://nonlinear.com/redirect/outbound?p=chemspider&param=4444064	0.00341606	1.1628
	2.51_1039.4755m/z		1039.48	1	2.50527	0.0920833	1	0.348378	8.89872	ZIKV	Ctrl	100 - 50.1	2576.88	49.28	211.746	373.975	181.933	179.504	500.738	2601.37	2612.27	549.401	5375.9	1745.49	316.297	332.8	184.348	178.675	479.224	3482.64	4051.96	588.756	6171.5	1775.01	x	x	x	x	HMDB0040654	Mabioside E	M+H	C48H78O22S	37.4	9.66	-2.26764	79.9319	http://nonlinear.com/redirect/outbound?p=hmdb&param=HMDB0040654	0.00141979	1.36331
	3.30_614.8153m/z		614.815	1	3.3037	0.257133	1	0.359036	8.32875	ZIKV	Ctrl	100 - 79.2 - 94.9 - 99.8 - 93.2 - 27.9 - 16.4 - 4.83 - 3.23	7344.21	28.06	804.708	482.385	999.542	1086.34	1035.98	14730.7	1585.41	1876.46	2965.2	15563.3	1202.04	429.274	1012.81	1081.32	991.473	19721	2459.17	2010.88	3404.03	15826.5	x	x	x	x	CSID25724	2347	M+H	C12H13I3N2O3	23.7	0	3.29365	22.2561	http://nonlinear.com/redirect/outbound?p=chemspider&param=25724	0.011834	1.47428
	2.66_557.7880m/z		557.788	1	2.6616	0.3205	1	0.352635	5.29853	ZIKV	Ctrl	100 - 95.3 - 21.4	4881.97	31.64	1016.85	452.182	1133.24	1164.75	839.885	8131.5	1365.49	2180.02	2602.09	10130.7	1518.93	402.396	1148.28	1159.37	803.8	10886.2	2118.04	2336.18	2987.18	10302.1	x	x	x	x	CSID6366	Tetrabromobisphenol A	M+NH4	C15H12Br4O2	20.5	0	-5.47564	8.55162	http://nonlinear.com/redirect/outbound?p=chemspider&param=6366	0.0101703	1.17982
	2.65_989.4651m/z		989.465	1	2.64732	0.114217	2	0.349682	4.00918	ZIKV	Ctrl	100 - 41.2 - 24.8 - 16.7	6645.49	23.92	2216.35	1882.01	1511.28	1193.84	1484.37	5348.27	4862.36	2758.76	13009.3	7248.79	3310.7	1674.79	1531.34	1188.32	1420.6	7160.11	7542.12	2956.38	14934.6	7371.39	x	x	x	x	CSID30791181	(1'R,3S,3'R,3aS,4S,4aR,7'R,7aR,8R,9'R,9aR,10'R)-4-Hydroxy-4a,8,9'-trimethyl-4'-methylene-4,4a,7a,8,9,9a-hexahydro-5'H,14'H-spiro[azuleno[6,5-b]furan-3,13'-[6]oxatetracyclo[9.2.2.0~1,10~.0~3,7~]pentadecane]-2,5,5',14'(3aH)-tetrone	2M+H	C29H34O7	38	17.5	-3.04565	76.2306	http://nonlinear.com/redirect/outbound?p=chemspider&param=30791181	0.00164421	2.00595
	3.03_1057.4717m/z		1057.47	1	3.03298	0.213433	2	0.349682	4.02443	ZIKV	Ctrl	100 - 95.1	2888.84	45.84	1338.2	703.506	456.139	320.38	770.9	3932.69	1848.1	1512.85	4576.57	2573.96	1998.95	626.049	462.193	318.901	737.778	5264.98	2866.64	1621.22	5253.88	2617.5	x	x	x	x	CSID30790890	(1'E,2S,6'R,11'R,13'R,15'S,16'R,19'E,21'E,23'S,27'R)-27'-Hydroxy-23'-[(1S)-1-hydroxyethyl]-9',15'-dimethyl-3'H,18'H-spiro[oxirane-2,14'-[4,12,17,24]tetraoxapentacyclo[21.3.1.1~13,16~.0~6,11~.0~6,15~]octacosa[1,9,19,21]tetraene]-3',18'-dione	2M+H	C29H36O9	41.6	51	-7.0739	65.0401	http://nonlinear.com/redirect/outbound?p=chemspider&param=30790890	0.00226404	1.26456
	6.75_243.1393m/z		243.139	1	6.74885	0.135617	31	0.399064	3.58258	ZIKV	Ctrl	100 - 33.4	2300.47	45.27	670.646	516.759	189.18	1465.92	368.123	2257.69	3220.86	579.411	2430.11	3014.26	1001.78	459.863	191.69	1459.15	352.307	3022.54	4995.96	620.916	2789.75	3065.24	x	x	x	x	CSID390822	Glutinosone	M+Na	C14H20O2	45.8	60.8	16.928	85.5022	http://nonlinear.com/redirect/outbound?p=chemspider&param=390822	0.0188949	1.20416
	4.67_1016.5020m/z		1016.5	1	4.66575	0.5277	3	0.394962	3.78265	ZIKV	Ctrl	100 - 66	10959.1	49.64	4919.35	2092.48	1760.06	1798.93	3915.18	15624.4	5542.47	3601.93	6798.98	23227.6	7348.32	1862.09	1783.42	1790.62	3746.96	20917.6	8597.06	3859.95	7805.19	23620.4	x	x	x	x	HMDB0127652	(4-{2-[(1R,16Z,24E,26E,28Z)-1,18-dihydroxy-19,30-dimethoxy-15,17,21,23,29,35-hexamethyl-2,3,10,14,20-pentaoxo-11,36-dioxa-4-azatricyclo[30.3.1.0鈦?鈦筣hexatriaconta-16,24,26,28-tetraen-12-yl]propyl}-2-methoxycyclohexyl)oxidanesulfonic acid	M+Na	C51H79NO16S	52.2	83.1	0.809726	78.9099	http://nonlinear.com/redirect/outbound?p=hmdb&param=HMDB0127652	0.0183767	2.04719
	2.49_494.7563m/z		494.756	1	2.49098	1.40487	1	0.349682	3.31916	ZIKV	Ctrl	56.2 - 100 - 76 - 49.9 - 32.7	26097.8	30.56	6660.64	5626.31	10025.9	10861.8	6139.09	39114.2	10830.9	12912.3	23024.4	44606.9	9949.39	5006.84	10159	10811.6	5875.32	52365	16800.1	13837.2	26431.9	45361.3	x	x	x	x	HMDB0034898	3,3-Dichloro-4-(dichloromethylene)-2,5-pyrrolidinedione	2M+H	C5HCl4NO2	27.5	0	-6.5845	44.8536	http://nonlinear.com/redirect/outbound?p=hmdb&param=HMDB0034898	0.00876113	3.03696
	4.17_1033.4837m/z		1033.48	1	4.16657	1.4907	1	0.349682	3.1954	ZIKV	Ctrl	100 - 90.3 - 83.4	35549.1	43.03	19370.6	8817.49	7482.83	8869.67	11084.8	59506.8	23541.5	15501.8	28418.8	50776.6	28935	7846.67	7582.14	8828.7	10608.6	79666	36515.7	16612.3	32624.6	51635.4	x	x	x	x	HMDB0030005	Austalide A	2M+H	C28H36O9	29	0	4.43032	50.0284	http://nonlinear.com/redirect/outbound?p=hmdb&param=HMDB0030005	0.00606423	3.46916
	2.62_1027.4423m/z		1027.44	1	2.61877	0.427733	1	0.343991	3.04259	ZIKV	Ctrl	5.4 - 5.6 - 88.8 - 100 - 58.1	8813.98	32.27	4586.05	2905.68	2119.37	1897.37	2975.88	11585.6	7821.74	4933.9	11658.1	8070.59	6850.45	2585.76	2147.5	1888.61	2848.03	15510.5	12132.5	5287.33	13383.4	8207.08	x	x	x	x	CSID391743	(5R)-5'-O-(5-Amino-5-deoxy-2-O-sulfo-beta-D-ribofuranosyl)-5'-C-[5-carboxy-6-({3-[(4-carboxy-3-methylbutanoyl)oxy]-12-methyltridecanoyl}oxy)-1,4-dimethyl-3-oxo-1,4-diazepan-2-yl]uridine	M+NH4	C42H67N5O21S	21.4	1	3.50459	10.0131	http://nonlinear.com/redirect/outbound?p=chemspider&param=391743	0.000995424	2.06689
	2.89_814.3764m/z		814.376	1	2.89023	0.1501	2	0.349682	2.88749	ZIKV	Ctrl	100 - 36.2	10377.9	8.35	3960.11	3840.19	3329.31	3287.05	3553.87	11335.7	6674.62	4548.15	20472	8859.2	5915.44	3417.38	3373.5	3271.87	3401.17	15176	10353.2	4873.94	23501.7	9009.03	x	x	x	x	HMDB0127539	2-amino-4-({1-[(carboxymethyl)-C-hydroxycarbonimidoyl]-2-{[(4S)-4,10,14,16-tetrahydroxy-5,9,11,13,13-pentamethyl-2-[1-(2-methyl-1,3-thiazol-4-yl)prop-1-en-2-yl]-12-oxo-1-azacyclohexadec-1(16)-en-5-yl]sulfanyl}ethyl}-C-hydroxycarbonimidoyl)butanoic acid	M+H	C37H59N5O11S2	40.4	29	4.80322	78.3422	http://nonlinear.com/redirect/outbound?p=hmdb&param=HMDB0127539	0.00659681	2.31217
	4.99_1103.5198m/z		1103.52	1	4.98715	0.477767	3	0.452638	2.96414	ZIKV	Ctrl	59.9 - 84.9 - 100 - 76.2	8391.66	52.62	5150.18	2384.51	1794.7	1444.71	3381.22	14207.6	5683.92	2284.16	4952.35	14830.2	7693.13	2121.97	1818.51	1438.03	3235.95	19020.8	8816.46	2447.78	5685.27	15081	x	x	x	x	HMDB0029769	Isoeruboside B	M+Na	C51H84O24	32	25.4	-4.3187	39.5936	http://nonlinear.com/redirect/outbound?p=hmdb&param=HMDB0029769	0.0494976	2.06788
	2.31_1029.4811m/z		1029.48	1	2.30523	0.135617	2	0.245727	2.49866	ZIKV	Ctrl	100 - 64.5 - 10.9	2080.11	15.85	843.715	1001.55	721.426	475.208	1120.57	1525.15	2166.99	2306.99	2340.12	2061.32	1260.31	891.275	731	473.013	1072.42	2041.83	3361.27	2472.25	2686.44	2096.18	x	x	x	x	HMDB0015101	Telmisartan	2M+H	C33H30N4O2	38.9	12.3	0.0834337	82.1545	http://nonlinear.com/redirect/outbound?p=hmdb&param=HMDB0015101	0.000510516	1.18557
	4.43_1018.4871m/z		1018.49	1	4.4309	0.634983	1	0.446089	2.70898	ZIKV	Ctrl	100 - 90.7	9797.68	54.37	7353.52	2149.75	1835.35	2576.33	4168.74	16316.3	7420.82	3347.24	7705.14	14198.9	10984.4	1913.06	1859.71	2564.44	3989.63	21843.8	11510.6	3587.01	8845.45	14439.1	x	x	x	x	CSID8571686	2-[(2-{[(1S,3R,4aR,5aS,6aR,7Z,9aS,10aR,11aS,12aR,13R,14aS,15aR,16aS,20aR,21aS,22aR,23aS,25aR,26aS,27aR,28aS,29aR,30aS)-1-Hydroxy-9a,13,20,21a,25a,26a,30a-heptamethyl-18-oxo-2,3,4a,5,5a,6a,9,9a,10a,11,11a,12a,13,14,14a,15a,16,16a,18,20a,21a,22,22a,23a,24,25,25a,26a,27,27a,28a,29,29a,30a-tetratriacontahydro-1H-pyrano[2'',3'':5',6']pyrano[2',3':5,6]pyrano[3,2-b]pyrano[2'''''',3'''''':5''''',6''''']p…	M+H	C52H75NO17S	39.4	31.8	4.17939	70.2708	http://nonlinear.com/redirect/outbound?p=chemspider&param=8571686	0.030558	1.28805
	2.63_996.4048n	996.405	1014.44	1	2.63303	0.663517	1	0.343991	2.37366	ZIKV	Ctrl	79.8 - 100 - 11.5 - 3.52	20715.5	24.07	10980.1	11988	6217.29	6420.99	8029.81	24638.3	16711.6	15436.1	26985	19806.6	16401.6	10668.1	6299.8	6391.33	7684.81	32985	25921.8	16541.8	30978.6	20141.6	x	x	x	x	CSID30791854	1-Ethyl-6-fluoro-4-oxo-7-(1-piperazinyl)-1,4-dihydro-1,8-naphthyridine-3-carboxylic acid hydrate (3:2)	M+NH4, M+Na	C45H55F3N12O11	33	0	-1.79465	67.3258	http://nonlinear.com/redirect/outbound?p=chemspider&param=30791854	0.000942944	3.34264
	2.70_967.4318m/z		967.432	1	2.70442	0.413317	3	0.343991	2.26391	ZIKV	Ctrl	71.9 - 100 - 94.1	16766.6	12.24	8257.65	8345.68	6423.29	6563.55	7440.13	18145.2	11616.4	12388.8	26389.2	15293.6	12334.9	7426.81	6508.54	6533.24	7120.47	24292.3	18018.5	13276.3	30294.7	15552.2	x	x	x	x	HMDB0010034	PIP2(16:0/16:2(9Z,12Z))	M+H	C41H77O19P3	29.8	8.12	-2.8026	44.3191	http://nonlinear.com/redirect/outbound?p=hmdb&param=HMDB0010034	0.00114748	2.68801
	4.69_985.4718m/z		985.472	1	4.69432	0.563617	3	0.380049	2.30957	ZIKV	Ctrl	98.6 - 100	10673.1	42.88	7852.48	3624.37	2602.99	4220.07	4806.29	17161.6	8773.8	5804.97	7665.18	13959.8	11729.7	3225.32	2637.53	4200.58	4599.79	22975.5	13609.3	6220.8	8799.58	14195.9	x	x	x	x	HMDB0061688	4-Hydroxyretinoic acid glucuronide	2M+H	C26H36O9	31.9	6.16	-7.45468	61.6036	http://nonlinear.com/redirect/outbound?p=hmdb&param=HMDB0061688	0.0151906	1.3434
	6.75_307.2409m/z		307.241	1	6.74885	0.135633	19	0.448579	2.15234	ZIKV	Ctrl	100 - 17.4	7174.7	37.8	4049.27	2525.71	2042.29	5162.06	2887.88	7083.31	9977.59	2710.27	7843.41	8258.94	6048.63	2247.63	2069.4	5138.22	2763.8	9482.94	15476.5	2904.42	9004.19	8398.62	x	x	x	x	HMDB0031183	N-(2-Hydroxyisobutyl)-2,4,8,10,12-tetradecapentaenamide	M+NH4	C18H27NO2	46	45.5	10.0095	95.6129	http://nonlinear.com/redirect/outbound?p=hmdb&param=HMDB0031183	0.0313009	1.81712
	4.69_987.4812m/z		987.481	1	4.69432	0.734933	1	0.452254	2.25302	ZIKV	Ctrl	95 - 100	15963.2	41.33	11426.3	5384.91	4119.25	5883.79	8611.91	26452.3	12724.5	7607.39	10103.5	22928.1	17068.2	4792.02	4173.91	5856.62	8241.91	35413.7	19737.3	8152.33	11598.8	23315.9	x	x	x	x	HMDB0039113	28-Glucosyl-30-methyl-3b,23-dihydroxy-12-oleanene-28,30-dioate 3-[arabinosyl-(1->3)-glucuronide]	M+H	C48H74O21	33.1	1.2	1.71238	66.2211	http://nonlinear.com/redirect/outbound?p=hmdb&param=HMDB0039113	0.0332509	1.85964
	4.40_172.0763n	172.076	345.204	1	4.40235	0.107083	6	0.392777	1.96591	ZIKV	Ctrl	100 - 11.5	8369.52	19.95	3647.27	4955.22	3269.49	5275.56	4139.1	7059.37	13463.6	10364.6	4575.45	6384.53	5448.14	4409.64	3312.88	5251.2	3961.26	9450.9	20883.7	11107.1	5252.59	6492.51	x	x	x	x	HMDB0032352	3-Isopropenylpentanedioic acid	M+H, 2M+H	C8H12O4	37.1	4.98	15.9896	96.7281	http://nonlinear.com/redirect/outbound?p=hmdb&param=HMDB0032352	0.0179311	1.70771
	4.89_913.4371m/z		913.437	1	4.88722	0.663717	2	0.452638	1.81273	ZIKV	Ctrl	91.7 - 100 - 4.72	14626.1	33.67	12072.4	7927.28	5346.48	5853.65	9142.94	23042.8	12561.8	7818.02	11625.6	18082.2	18033.3	7054.47	5417.43	5826.61	8750.12	30849	19484.9	8378.05	13346.1	18388	x	x	x	x	CSID23332653	kurarinol	2M+H	C26H32O7	32.1	0	0.255026	60.6862	http://nonlinear.com/redirect/outbound?p=chemspider&param=23332653	0.043556	1.93739
	2.63_925.4190m/z		925.419	1	2.63303	2.083	4	0.349682	1.73087	ZIKV	Ctrl	74.1 - 93.5 - 93.9 - 100 - 3.17 - 2.61	107946	13.93	74890.8	65218.6	54215.2	54052.5	63448.6	144628	85048.1	77969	107578	124509	111869	58037.9	54934.7	53802.8	60722.6	193623	131920	83554.1	123498	126615	x	x	x	x	CSID4937091	OXAMARIN HYDROCHLORIDE	2M+H	C22H34Cl2N2O4	29	0	1.41296	46.8897	http://nonlinear.com/redirect/outbound?p=chemspider&param=4937091	0.00363591	5.62814
	2.87_245.1853m/z		245.185	1	2.8686	0.157267	94	0.420616	1.7548	ZIKV	Ctrl	100 - 13.2	9246.35	27.74	7796.6	4154.66	4724.26	4484.92	5185.51	11702.1	10111.5	10348.6	4734.63	9335	11646.2	3697.22	4786.96	4464.2	4962.72	15666.4	15684.2	11089.9	5435.33	9492.89	x	x	x	x	HMDB0028910	Isoleucyl-Isoleucine	M+H	C12H24N2O3	39.6	3.59	-2.74621	97.813	http://nonlinear.com/redirect/outbound?p=hmdb&param=HMDB0028910	0.0234043	1.37663
	6.21_347.2198m/z		347.22	1	6.2138	0.1715	42	0.354828	1.63959	ZIKV	Ctrl	100 - 50.5	6836	15.4	4152.05	4822.88	3392.4	4790.78	3688.57	8488.83	8826.32	6338.35	4406.12	6120.39	6202.16	4291.87	3437.42	4768.66	3530.09	11364.6	13690.7	6792.39	5058.2	6223.9	x	x	x	x	HMDB0031007	1-Acetoxy-2-hydroxy-16-heptadecyn-4-one	M+Na	C19H32O4	37.1	8.8	1.72114	78.7566	http://nonlinear.com/redirect/outbound?p=hmdb&param=HMDB0031007	0.0111359	1.27061
	3.44_900.4206m/z		900.421	1	3.43932	2.3748	1	0.352635	1.68847	ZIKV	Ctrl	95.1 - 100 - 93.2	124590	11.56	87516.4	72114.6	66669.4	67029.9	75614.8	167826	94640	85564.6	111782	163140	130728	64174.6	67554.2	66720.3	72366	224681	146798	91693.9	128325	165899	x	x	x	x	HMDB0040695	Lyciumin D	M+H	C45H57N9O11	33	15.5	-4.87414	55.2051	http://nonlinear.com/redirect/outbound?p=hmdb&param=HMDB0040695	0.0102787	5.28926
	4.58_329.2081m/z		329.208	1	4.5801	0.291967	29	0.349682	1.57089	ZIKV	Ctrl	100 - 34	17235.2	15.19	8930.74	12869.7	9642.8	11213.4	12201.6	15236.8	23227.1	16363.1	14161.7	17187.5	13340.4	11452.8	9770.77	11161.6	11677.3	20398.6	36028.1	17535.3	16257.5	17478.2	x	x	x	x	CSID10128496	dihydromonacolin L	M+Na	C19H30O3	45.8	43	-2.06014	88.3686	http://nonlinear.com/redirect/outbound?p=chemspider&param=10128496	0.00358684	2.39078
	5.70_929.4511m/z		929.451	1	5.70015	0.52075	7	0.440648	1.6563	ZIKV	Ctrl	100 - 82	8978.7	28.25	7612.3	5673.18	3799.88	3856.06	6163.35	12239.8	9992.99	5569.65	7527.07	9564.03	11370.9	5048.56	3850.31	3838.25	5898.55	16386.3	15500.4	5968.63	8641.03	9725.78	x	x	x	x	HMDB0029989	Dulciol B	2M+H	C28H32O6	36.9	20.4	4.37071	69.3858	http://nonlinear.com/redirect/outbound?p=hmdb&param=HMDB0029989	0.0295666	1.32292
	7.43_406.2709n	406.271	429.262	1	7.4267	0.178667	10	0.452638	1.56568	ZIKV	Ctrl	100 - 18.1	31943.8	13.41	21754.5	19388.7	17913.9	24526.8	18428.4	35015.7	35689.3	16760.3	32239.3	40014.4	32495.9	17253.9	18151.7	24413.5	17636.7	46878	55358.6	17960.9	37010.5	40691.2	x	x	x	x	HMDB0033399	Annocherin A	M+NH4, M+Na, 2M+H	C24H38O5	40.3	14.5	-2.40932	89.8031	http://nonlinear.com/redirect/outbound?p=hmdb&param=HMDB0033399	0.0368052	3.37172
	3.80_829.3906m/z		829.391	1	3.80288	1.42645	1	0.354069	1.59354	ZIKV	Ctrl	99 - 100	71610.6	8.69	51079.2	45669	41378.6	41770.4	44793	95684.3	54745.3	51535.8	65335.1	90752.6	76300.1	40640.7	41927.8	41577.5	42868.5	128099	84916.7	55227.5	75004.3	92287.4	x	x	x	x	CSID4593753	naltrindole	2M+H	C26H26N2O3	31.2	1.07	-6.50545	62.4881	http://nonlinear.com/redirect/outbound?p=chemspider&param=4593753	0.0110613	4.17471
	3.92_821.3790m/z		821.379	1	3.91743	1.8763	10	0.349682	1.5831	ZIKV	Ctrl	98.5 - 100	87159.1	7.01	59924.1	57188.1	52195.3	50284.6	55688.3	112242	68646.6	64835.8	86017.4	104054	89512.2	50891.6	52888.1	50052.3	53295.7	150266	106479	69480.2	98747.5	105814	x	x	x	x	HMDB0014368	Diflorasone	2M+H	C22H28F2O5	35.5	29.5	-11.2042	60.0926	http://nonlinear.com/redirect/outbound?p=hmdb&param=HMDB0014368	0.00479959	4.96221
	2.25_231.1691m/z		231.169	1	2.24813	0.128483	15	0.352635	1.60603	ZIKV	Ctrl	100 - 13.1	13252.9	19.47	10260.7	6017.53	9022.61	7454.43	8504.49	16001.8	11045.8	13724.5	9338.24	16154.1	15327.1	5354.99	9142.35	7420	8139.1	21422.7	17133.4	14707.6	10720.2	16427.3	x	x	x	x	HMDB0029130	Valyl-Isoleucine	M+H	C11H22N2O3	41.2	13.5	-5.47732	98.6015	http://nonlinear.com/redirect/outbound?p=hmdb&param=HMDB0029130	0.0103814	1.82523
	2.48_703.3312m/z		703.331	1	2.48385	0.527717	5	0.349682	1.5477	ZIKV	Ctrl	100 - 84.8 - 26.2	52721.1	8.23	37064.3	36630.5	31721.9	30845.2	34058.8	71125.7	43803.5	38357.8	51469.9	58848.6	55365	32597.4	32142.9	30702.8	32595.5	95221.1	67944.7	41105.5	59087.1	59843.9	x	x	x	x	HMDB0035433	Canarigenin 3-[glucosyl-(1->4)-6-deoxy-alloside]	M+Na	C35H52O13	40.8	36.4	1.7292	69.8797	http://nonlinear.com/redirect/outbound?p=hmdb&param=HMDB0035433	0.00667156	3.70243
	2.15_417.2072m/z		417.207	1	2.1482	0.199367	13	0.384376	1.49722	ZIKV	Ctrl	100 - 11.6 - 10.2	23419.1	18.99	13913	20838.7	15378.8	13808.8	14268.9	19276.7	24827.1	17291.4	31325.8	24374.3	20782.7	18544.3	15582.9	13745	13655.9	25807.1	38510	18530.1	35961.8	24786.5	x	x	x	x	HMDB0036340	Ethyl 7-epi-12-hydroxyjasmonate glucoside	M+H	C20H32O9	42.2	36	-11.4199	86.9818	http://nonlinear.com/redirect/outbound?p=hmdb&param=HMDB0036340	0.0160248	2.85843
	3.08_880.3938m/z		880.394	1	3.07512	2.54573	1	0.349682	1.53804	ZIKV	Ctrl	100 - 99.9 - 94.4	118134	11.22	87358.3	82895.2	69328.4	67196.4	77260.7	152594	93550.8	88326.3	117675	138523	130492	73768.3	70248.5	66886	73941.2	204289	145109	94653.4	135090	140865	x	x	x	x	CSID391915	Urdamycin F	M+NH4	C43H58O18	33.1	14	-2.70405	54.5172	http://nonlinear.com/redirect/outbound?p=chemspider&param=391915	0.00804162	5.26435
	3.20_842.3932m/z		842.393	1	3.19647	2.36053	2	0.349682	1.52409	ZIKV	Ctrl	97.5 - 100	96734.7	7.76	70143.9	65743.7	59281.9	58047.6	64135.1	121815	76272.9	77439.1	93280.6	114866	104778	58505.2	60068.7	57779.5	61379.5	163082	118309	82986.3	107086	116809	x	x	x	x	HMDB0116157	CDP-DG(i-12:0/i-12:0)	M+H	C36H65N3O15P2	36.8	23.5	-3.71878	64.8179	http://nonlinear.com/redirect/outbound?p=hmdb&param=HMDB0116157	0.00434372	4.87581
	4.45_867.4042m/z		867.404	1	4.45232	2.1612	2	0.352635	1.51701	ZIKV	Ctrl	100 - 93.5	79812.6	9.21	58598.7	54576	47346.3	47892	54645.5	104152	64302.6	60432	72507.1	97669.3	87532.4	48567.1	47974.6	47670.8	52297.7	139435	99741.3	64761	83237.7	99321.2	x	x	x	x	HMDB0036339	25-Acetyl-6,7-didehydrofevicordin F 3-[glucosyl-(1->6)-glucoside]	M+H	C43H62O18	33	0	3.78688	69.525	http://nonlinear.com/redirect/outbound?p=hmdb&param=HMDB0036339	0.00982306	3.74873
	4.54_801.3913m/z		801.391	1	4.53797	0.6412	6	0.384376	1.48775	ZIKV	Ctrl	92 - 100 - 12.7	23596	6.14	17034.1	16003.6	14934.3	14808.7	16520.5	32051.8	18809.5	16494.1	24358.4	26266.3	25444.8	14241.6	15132.5	14740.3	15810.7	42910	29175.9	17675.6	27963.2	26710.6	x	x	x	x	CSID4470744	Enprostil	2M+H	C23H28O6	36.1	32.8	8.5669	57.0779	http://nonlinear.com/redirect/outbound?p=chemspider&param=4470744	0.0160037	2.07071
	2.73_775.3700m/z		775.37	1	2.72583	2.06057	1	0.378644	1.49827	ZIKV	Ctrl	100 - 97	105760	7.8	77222.9	72304.4	64670.6	65105.7	73635.4	137768	83135.8	80788.3	91901.8	135204	115352	64343.6	65528.9	64805	70471.7	184441	128954	86575.4	105503	137491	x	x	x	x	CSID64562	D-Epifrin	2M+H	C19H29ClNO5	30	0	0.262126	50.4762	http://nonlinear.com/redirect/outbound?p=chemspider&param=64562	0.0149757	4.59019
	2.19_259.1722m/z		259.172	1	2.19103	0.0785167	32	0.349682	1.44297	ZIKV	Ctrl	100 - 71.8	7537.13	10.81	4461.68	5573.52	5759.17	5533.84	4788.49	8805.36	7394.8	5771.78	8450.58	7263.16	6664.68	4959.87	5835.61	5508.28	4582.76	11788.4	11470.2	6185.23	9701.21	7386	x	x	x	x	CSID12874	Terbutryn	M+NH4	C10H19N5S	33.1	11.8	9.37413	63.9261	http://nonlinear.com/redirect/outbound?p=chemspider&param=12874	0.00369497	1.45295
	3.33_815.3911m/z		815.391	1	3.32512	2.30363	1	0.420792	1.48772	ZIKV	Ctrl	100 - 99.9	92784.8	9.8	69763.6	64263.3	55402.3	56736	65670.6	126544	73817.3	69441.4	77561.9	116559	104210	57187.8	56137.5	56474	62849.1	169414	114500	74415.8	89040.5	118530	x	x	x	x	CSID30791885	Potassium (2S,3R,4S)-4-{(2S,5R,7S,8R,9S)-9-hydroxy-2-[(2S,2'R,3'S,5R,5'R)-5'-{(2S,3S,5R,6R)-6-hydroxy-3,5-dimethyl-6-[(propionyloxy)methyl]tetrahydro-2H-pyran-2-yl}-2,3'-dimethyloctahydro-2,2'-bifuran-5-yl]-2,8-dimethyl-1,6-dioxaspiro[4.5]dec-7-yl}-2-methyl-3-(propionyloxy)pentanoate	M+Na	C40H65KO13	31.5	0	-5.56226	63.7243	http://nonlinear.com/redirect/outbound?p=chemspider&param=30791885	0.0236041	3.91352
	4.35_801.3770m/z		801.377	1	4.35238	2.39642	7	0.357918	1.47988	ZIKV	Ctrl	97 - 100 - 77.6	159777	7.77	116278	115220	100025	98346.2	109958	200196	126609	121737	148886	201454	173692	102534	101353	97891.9	105234	268017	196386	130457	170921	204861	x	x	x	x	CSID4470744	Enprostil	2M+H	C23H28O6	30.6	17.5	-9.39042	45.5684	http://nonlinear.com/redirect/outbound?p=chemspider&param=4470744	0.0115982	5.95391
	2.96_738.3511m/z		738.351	1	2.9616	1.49798	2	0.42576	1.47139	ZIKV	Ctrl	100 - 87.7	93256.4	5.96	66604.7	66340.5	60441.2	58296.2	65216.2	125541	70300	70036.9	82315.3	118089	99491.3	59036.3	61243.3	58027	62414.2	168071	109044	75053.9	94497.5	120086	x	x	x	x	HMDB0014646	Ritonavir	M+NH4	C37H48N6O5S2	32	0	6.3188	67.2298	http://nonlinear.com/redirect/outbound?p=hmdb&param=HMDB0014646	0.0245173	3.45063
	2.83_777.3591m/z		777.359	1	2.8329	0.542	6	0.349682	1.47152	ZIKV	Ctrl	100 - 93	30012.6	6.73	22349.9	21063.9	19929.3	18717.4	19918	36898	23908.3	23923.1	30731.8	34601.9	33385.4	18744.8	20193.8	18630.9	19062.2	49398	37084.8	25636.8	35280	35187.2	x	x	x	x	HMDB0040706	7-Epi-12-hydroxyjasmonic acid glucoside	2M+H	C18H28O9	36.3	28.3	6.60231	60.891	http://nonlinear.com/redirect/outbound?p=hmdb&param=HMDB0040706	0.00464185	2.82681
	2.44_689.3182m/z		689.318	1	2.44102	0.541933	1	0.349682	1.45357	ZIKV	Ctrl	100 - 87.8 - 43.1	55307.9	6.7	40260	40990.8	36753.1	34829.8	37414.4	69959	44293.3	42333.1	56527.9	63426.2	60138.8	36477.6	37240.9	34668.9	35806.9	93659.2	68704.4	45365.6	64893.7	64498.9	x	x	x	x	CSID62038	piketoprofen	2M+H	C22H20N2O2	29.7	2.85	8.65131	55.4581	http://nonlinear.com/redirect/outbound?p=chemspider&param=62038	0.00845404	3.54745
	2.41_719.3346m/z		719.335	1	2.4123	1.59755	8	0.349682	1.42381	ZIKV	Ctrl	100 - 99.7	101277	6.66	74219.7	76054.6	68645.7	64215.8	72519.2	119222	81324.5	80980.7	105869	118989	110866	67680.9	69556.8	63919.2	69403.5	159612	126144	86781.7	121537	121001	x	x	x	x	CSID20178	Thalicarpine	M+Na	C41H48N2O8	34.3	10.5	6.13035	68.1008	http://nonlinear.com/redirect/outbound?p=chemspider&param=20178	0.00612144	5.373
	6.69_317.2189m/z		317.219	1	6.69175	0.2572	3	0.452638	1.39264	ZIKV	Ctrl	100 - 19.9	12204.2	19.01	9053.48	9650.99	5953.25	10549	8610.3	10904.9	14026.1	8903.85	14533.6	12652.7	13523.7	8588.4	6032.26	10500.3	8240.36	14599.2	21756.3	9541.66	16684.5	12866.7	x	x	x	x	HMDB0144301	1-(dimethylamino)-2-methyl-3,4-diphenylbutane-1,3-diol	M+NH4	C19H25NO2	37.9	4.91	-11.484	96.6737	http://nonlinear.com/redirect/outbound?p=hmdb&param=HMDB0144301	0.03673	1.67758
	2.88_749.3524m/z		749.352	1	2.88308	1.59063	13	0.35789	1.42127	ZIKV	Ctrl	100 - 99.2	88506.2	7.35	68068.5	65195.7	58737.1	56872.8	62488.2	111586	70506.8	71079.4	83072.7	106286	101678	58017.5	59516.7	56610.1	59803.4	149389	109365	76171.1	95367	108084	x	x	x	x	HMDB0041139	Sonchifolin	2M+H	C21H26O6	35.2	16.5	-0.997824	60.5718	http://nonlinear.com/redirect/outbound?p=hmdb&param=HMDB0041139	0.0115344	4.30104
	2.23_815.3449m/z		815.345	1	2.22672	0.7772	3	0.384376	1.40443	ZIKV	Ctrl	99.3 - 100	21114.6	14.73	15158.2	17981.6	14782.9	11771.5	15477.3	21265.7	18397.4	16264.6	23009.4	26635.9	22642.7	16001.8	14979.1	11717.1	14812.4	28470	28536.6	17429.6	26414.7	27086.4	x	x	x	x	HMDB0014969	Trifluoperazine	2M+H	C21H24F3N3S	30.4	4.43	11.0474	59.4445	http://nonlinear.com/redirect/outbound?p=hmdb&param=HMDB0014969	0.0158579	2.57748
	3.03_555.2621m/z		555.262	1	3.02585	0.199167	2	0.352635	1.36139	ZIKV	Ctrl	100 - 87 - 58.3	28310.6	10.32	19243.2	23350.9	18459.8	20205.8	22717.2	34781.2	25194.4	23284	25976.6	32317	28744.7	20779.9	18704.7	20112.5	21741.2	46564.1	39079.6	24952	29821	32863.6	x	x	x	x	HMDB0041328	3'-Deaminofusarochromanone	2M+H	C15H19NO4	27.7	4.91	-14.3829	48.5272	http://nonlinear.com/redirect/outbound?p=hmdb&param=HMDB0041328	0.00998316	2.58404
	2.53_616.3026m/z		616.303	1	2.52667	0.12065	4	0.452638	1.39192	ZIKV	Ctrl	100 - 61.8 - 46.4	15271	12.69	12737.5	10935.8	10165.3	9174.89	11842.6	19196.9	12743.4	10927.9	13831.6	19655.3	19026.8	9731.79	10300.2	9132.52	11333.8	25700.3	19766.6	11710.7	15878.6	19987.7	x	x	x	x	HMDB0015490	Paromomycin	M+H	C23H45N5O14	38.8	31.8	-1.65925	64.1259	http://nonlinear.com/redirect/outbound?p=hmdb&param=HMDB0015490	0.0426724	1.65275
	6.27_361.2847m/z		361.285	1	6.2709	0.264283	9	0.42576	1.37123	ZIKV	Ctrl	100 - 27.4 - 6.25 - 1.27	121213	13.69	104148	112142	63499.2	81727.3	80469.8	100407	139749	135390	120447	110070	155572	99794.9	64341.9	81349.8	77012.5	134422	216768	145088	138273	111932	x	x	x	x	CSID391283	Paravallarine	M+NH4	C22H33NO2	48	45.8	-0.785747	95.0481	http://nonlinear.com/redirect/outbound?p=chemspider&param=391283	0.0246403	5.96502
	4.47_717.3538m/z		717.354	1	4.47373	2.2827	10	0.384376	1.37963	ZIKV	Ctrl	100 - 93	139761	4.2	106669	103649	100339	95258.3	100600	174259	109852	109815	138544	166334	159338	92236.8	101671	94818.3	96278.2	233293	170394	117682	159047	169148	x	x	x	x	HMDB0005798	Malabaricone C	2M+H	C21H26O5	29.7	0	-13.3294	62.5206	http://nonlinear.com/redirect/outbound?p=hmdb&param=HMDB0005798	0.0163119	4.81022
	2.88_603.2864m/z		603.286	1	2.87595	1.53372	9	0.349682	1.35864	ZIKV	Ctrl	96.5 - 100 - 53.8	160045	6.6	115276	131034	116767	110499	115415	170374	136300	127223	188561	177767	172195	116607	118317	109989	110456	228092	211419	136336	216467	180774	x	x	x	x	CSID16736543	bluensomycin	M+NH4	C21H39N5O14	38.1	46.6	5.51241	50.1977	http://nonlinear.com/redirect/outbound?p=chemspider&param=16736543	0.00703312	6.87336
	3.33_705.3345m/z		705.335	1	3.32512	0.720633	3	0.374452	1.35368	ZIKV	Ctrl	100 - 93.8	51330.7	8.08	38357.9	42380.8	36142.5	34182.6	38532.6	62408	41645.9	40865.5	53770.9	57963.4	57297.5	37714.6	36622.1	34024.7	36877.1	83550.2	64598	43792.8	61728.6	58943.7	x	x	x	x	CSID390350	[(1alpha,6beta,14alpha,16beta)-20-Ethyl-7,8-dihydroxy-1,6,14,16-tetramethoxyaconitan-4-yl]methyl 2-(3-methyl-2,5-dioxo-1-pyrrolidinyl)benzoate	M+Na	C37H50N2O10	41	38.8	-1.856	68.6019	http://nonlinear.com/redirect/outbound?p=chemspider&param=390350	0.0146023	3.12817
	3.61_378.2321m/z		378.232	1	3.60993	0.08565	14	0.349682	1.3357	ZIKV	Ctrl	100 - 17	7077.71	11.33	6097.91	5413.22	4615.7	4798.58	5568.94	8004.97	7502.2	6495.58	7638.22	5747.6	9108.8	4817.21	4676.96	4776.41	5329.67	10716.8	11636.8	6960.88	8768.63	5844.81	x	x	x	x	CSID4444880	CINERIN II	M+NH4	C21H28O5	38.4	13.7	12.8708	91.9514	http://nonlinear.com/redirect/outbound?p=chemspider&param=4444880	0.00681349	1.11781
	3.48_697.3203m/z		697.32	1	3.48215	1.69698	26	0.349682	1.33443	ZIKV	Ctrl	100 - 94.3 - 88.7 - 82.9	189518	5.93	146829	151551	138422	129611	143698	219717	159937	157499	201306	209134	219327	134865	140259	129012	137524	294150	248083	168781	231098	212671	x	x	x	x	HMDB0037773	8-Angeloylegelolide	2M+H	C19H24O6	30.2	19.5	-2.16343	34.0939	http://nonlinear.com/redirect/outbound?p=hmdb&param=HMDB0037773	0.00569277	6.55774
	2.63_578.2771m/z		578.277	1	2.63303	0.128483	2	0.349682	1.32761	ZIKV	Ctrl	100 - 73.4 - 81.8	21428.9	7.81	17460.6	17515.8	15006	15030.4	15691.9	21978.3	20594	16833.5	24000.7	23737.8	26081.9	15587.3	15205.1	14961	15017.7	29424	31943.8	18039.4	27552.7	24139.3	x	x	x	x	CSID391613	Chloramphenicol palmitate	M+NH4	C27H42Cl2N2O6	33.1	0.314	2.33592	68.1528	http://nonlinear.com/redirect/outbound?p=chemspider&param=391613	0.00532058	2.71029
	4.06_651.3211m/z		651.321	1	4.0595	0.613733	6	0.349682	1.31809	ZIKV	Ctrl	100 - 81.5	46764.9	7.33	36333.8	38822.3	33744.7	32112.3	36384	51748	43023.7	36622.7	53878.8	48551.4	54273.9	34547.9	34192.5	31964	34820.8	69278.8	66735.1	39246.2	61852.6	49372.6	x	x	x	x	CSID17275597	Golvatinib	M+NH4	C33H37F2N7O4	34.4	0	-0.406007	72.6928	http://nonlinear.com/redirect/outbound?p=chemspider&param=17275597	0.00838158	3.24609
	6.26_379.2955m/z		379.295	1	6.26377	0.2643	3	0.452638	1.32275	ZIKV	Ctrl	100 - 24.6	509517	12.34	437532	504187	279820	355628	348805	434724	537446	598221	507104	470090	653567	448675	283533	353986	333818	581997	833645	641074	582152	478041	x	x	x	x	HMDB0005096	N-Arachidonoyl glycine	M+NH4	C22H35NO3	52.1	63.8	-0.161196	96.8778	http://nonlinear.com/redirect/outbound?p=hmdb&param=HMDB0005096	0.0339417	12.243
	2.64_712.3284m/z		712.328	1	2.64018	2.18938	1	0.353723	1.31876	ZIKV	Ctrl	94.6 - 100	119726	6.69	94236.5	97911	86486.7	82820.8	92480.7	140614	99357.2	99660	122014	136987	140767	87130.8	87634.6	82438.2	88507.3	188250	154115	106799	140071	139304	x	x	x	x	CSID390354	Nepaline	M+Na	C36H51NO12	38.1	30.4	-2.89335	63.425	http://nonlinear.com/redirect/outbound?p=chemspider&param=390354	0.0106692	5.09558
	3.65_687.3203m/z		687.32	1	3.65277	1.34045	4	0.365788	1.32219	ZIKV	Ctrl	100 - 90.8	100380	7.75	83959.9	79230.5	70946.8	69751.3	75708.5	122514	85653	83100.4	95571.4	115062	125416	70507.1	71888.3	69429.1	72455.7	164018	132858	89053.2	109715	117008	x	x	x	x	HMDB0032224	N1-(2,4-Dimethoxybenzyl)-n2-(2-(pyridin-2-yl) ethyl)oxalamide	2M+H	C18H21N3O4	30.4	0	9.62715	62.3546	http://nonlinear.com/redirect/outbound?p=hmdb&param=HMDB0032224	0.0132006	4.69741
	3.30_599.3006m/z		599.301	1	3.2964	0.756317	11	0.452638	1.31811	ZIKV	Ctrl	98.6 - 100	65738.4	5.02	52951.1	51787.4	48012.1	46973.3	49642.5	82230.5	54836	50381	60985.7	80258.8	79096.1	46085.5	48649.3	46756.3	47509.6	110088	85057.4	53989.9	70011.2	81616.2	x	x	x	x	HMDB0015214	Streptomycin	M+NH4	C21H39N7O12	45	67.1	1.84891	60.3253	http://nonlinear.com/redirect/outbound?p=hmdb&param=HMDB0015214	0.0353642	3.397
	2.66_666.3125m/z		666.313	1	2.6616	1.75408	4	0.352635	1.30861	ZIKV	Ctrl	96.8 - 100	117742	6.67	91153.6	97496.3	86611.9	81812.4	92799.8	133626	95715.5	100831	128973	129566	136161	86761.8	87761.4	81434.6	88812.7	178894	148467	108054	148061	131757	x	x	x	x	HMDB0014964	Natamycin	M+H	C33H47NO13	51.2	93.5	0.789619	63.3286	http://nonlinear.com/redirect/outbound?p=hmdb&param=HMDB0014964	0.00938625	5.23454
	3.06_621.3003m/z		621.3	1	3.06083	1.34758	10	0.349682	1.30868	ZIKV	Ctrl	100 - 88.6	106956	4.02	83064	86124.9	79898.5	77412.9	82141.7	124909	88730.2	91724.1	104419	124999	124078	76642.4	80958.9	77055.4	78612.5	167224	137631	98294.6	119872	127113	x	x	x	x	HMDB0061690	1-Arachidonoylglycerophosphoinositol	M+H	C29H49O12P	35.8	18.1	-5.12553	66.9717	http://nonlinear.com/redirect/outbound?p=hmdb&param=HMDB0061690	0.00882661	4.4345
	3.89_673.3180m/z		673.318	1	3.8887	1.54083	4	0.452254	1.29593	ZIKV	Ctrl	100 - 90.1 - 87	173147	9.25	126456	149813	124292	123483	143997	222095	133171	162064	158664	189742	188894	133318	125942	122913	137810	297334	206565	173673	182145	192951	x	x	x	x	CSID393753	Thapsigargin	M+Na	C34H50O12	32.8	13.6	-2.19737	52.7539	http://nonlinear.com/redirect/outbound?p=chemspider&param=393753	0.0323453	6.14483
	2.57_245.1850m/z		245.185	1	2.5688	0.0920833	94	0.452638	1.36371	ZIKV	Ctrl	100 - 26.7 - 0.721	9323.3	13.81	9801.62	5410.86	6333.67	5253.95	7383.39	9876.22	8249.32	10582.2	7667.73	10241	14641.3	4815.11	6417.73	5229.69	7066.16	13222	12795.7	11340.3	8802.51	10414.2	x	x	x	x	CSID871	6-[(6-Aminohexanoyl)amino]hexanoic acid	M+H	C12H24N2O3	38.6	8.03	-3.86927	89.4245	http://nonlinear.com/redirect/outbound?p=chemspider&param=871	0.0359839	1.42433
	2.83_636.2996m/z		636.3	1	2.82577	1.78978	3	0.36089	1.28918	ZIKV	Ctrl	98.5 - 100 - 89.6	195192	6.15	151077	163862	146220	139559	156322	223840	158098	171040	196321	226660	225673	145820	148161	138914	149606	299671	245229	183292	225375	230494	x	x	x	x	HMDB0060661	APC	M+NH4	C33H38N4O8	40.9	60.6	-5.21656	49.8158	http://nonlinear.com/redirect/outbound?p=hmdb&param=HMDB0060661	0.0126128	6.49037
	5.73_377.2786m/z		377.279	1	5.7287	0.19295	9	0.437425	1.28465	ZIKV	Ctrl	100 - 27.3	33899.9	12.04	29768.2	32181.4	20411.5	25025.8	24555.4	29646.9	36095.3	36451.4	37962.4	29343.4	44466.5	28638.2	20682.4	24910.3	23500.4	39690.5	55988.3	39062.5	43580.6	29839.7	x	x	x	x	CSID10202364	Ajaconine	M+NH4	C22H33NO3	42	19.2	-3.64086	95.0379	http://nonlinear.com/redirect/outbound?p=chemspider&param=10202364	0.0290944	2.97502
	2.83_647.3071m/z		647.307	1	2.8329	1.53333	10	0.37448	1.28635	ZIKV	Ctrl	100 - 92 - 26.9	128227	5.56	101378	108150	96688.2	93488.5	98710.4	146218	105226	108724	129914	151053	151434	96242.1	97971.4	93056.7	94469.4	195753	163218	116512	149141	153608	x	x	x	x	HMDB0034104	Neferine	M+Na	C38H44N2O6	39	29.6	-3.223	69.0878	http://nonlinear.com/redirect/outbound?p=hmdb&param=HMDB0034104	0.0146705	4.87129
	2.75_460.2481m/z		460.248	1	2.75438	0.748467	2	0.349682	1.28155	ZIKV	Ctrl	100 - 94.9	98706.7	4.43	77103.7	81669.1	73254.5	74263.9	78816.4	115110	83128.6	88110.2	93992.5	113193	115174	72677.2	74226.7	73920.9	75430.1	154106	128943	94421.9	107903	115107	x	x	x	x	CSID30790761	(2S,3R,3aR,4aS,4bR,6aS,12bS,12cS,14aS)-2-(2-Hydroxy-2-propanyl)-12b,12c-dimethyl-3,3a,5,6,6a,7,12,12b,12c,13,14,14a-dodecahydro-2H,4bH-oxireno[4',4a']chromeno[5',6':6,7]indeno[1,2-b]indol-3-ol	M+Na	C27H35NO4	33.7	9.87	5.17123	64.8183	http://nonlinear.com/redirect/outbound?p=chemspider&param=30790761	0.00818107	4.58604
	0.96_491.2388m/z		491.239	1	0.956333	0.256483	15	0.452638	1.25762	ZIKV	Ctrl	100 - 45.9	15975.7	14.7	10505.7	14278	11738.9	14987.2	12005.7	19199.2	13331.8	14343.2	14902.5	18101.8	15692.9	12706	11894.7	14918	11489.9	25703.4	20679.3	15370.6	17107.9	18407.9	x	x	x	x	HMDB0129664	2-(2,4-dihydroxyphenyl)-3-[5-(3,3-dimethyloxiran-2-yl)-3-methylpent-2-en-1-yl]-7-hydroxy-8-(3-methylbut-2-en-1-yl)-4H-chromen-4-one	M+H	C30H34O6	39.7	20.6	-8.08935	86.6713	http://nonlinear.com/redirect/outbound?p=hmdb&param=HMDB0129664	0.0448875	2.18899
	3.69_679.3291m/z		679.329	1	3.68845	1.17697	1	0.42576	1.28309	ZIKV	Ctrl	100 - 89.4	81333.2	5.52	65536.8	66766.8	60204.2	59045.2	65389.4	101815	65412.5	70342.7	76911.1	92184.3	97896.2	59415.6	61003.2	58772.5	62580	136307	101463	75381.6	88293.5	93743.4	x	x	x	x	CSID56609	DEFEROXAMINE MESILATE	M+Na	C26H52N6O11S	32.3	0	-2.48144	64.6488	http://nonlinear.com/redirect/outbound?p=chemspider&param=56609	0.0254661	3.73156
	2.49_609.2899m/z		609.29	1	2.49098	0.52075	3	0.446624	1.29032	ZIKV	Ctrl	100 - 80.7	45061.3	6.91	36520.4	37168.7	32637.9	31987.4	36298.8	52260.7	35992.5	37367.4	44056.7	55629.2	54552.6	33076.4	33071.1	31839.7	34739.2	69965.2	55828.9	40044.2	50576.8	56570.1	x	x	x	x	CSID390247	Nopaline	2M+H	C11H20N4O6	33.3	15.3	9.96305	62.1891	http://nonlinear.com/redirect/outbound?p=chemspider&param=390247	0.0309005	3.06492
	4.64_641.3107m/z		641.311	1	4.6372	2.6605	6	0.349682	1.27053	ZIKV	Ctrl	100 - 92	196495	8.96	161288	164222	140532	138935	168306	234574	186693	171109	185038	205062	240925	146141	142397	138293	161075	314041	289583	183366	212423	208531	x	x	x	x	CSID405779	BILA 2185BS	M+Na	C35H46N4O4S	48.1	78	-4.11695	67.2873	http://nonlinear.com/redirect/outbound?p=chemspider&param=405779	0.00807866	6.96163
	3.15_520.2581m/z		520.258	1	3.1465	0.81985	7	0.452638	1.27754	ZIKV	Ctrl	88.3 - 100 - 58.9	126487	4.48	99325.2	105057	98022.2	92676.1	99963.5	160589	97674.9	106544	119320	148310	148368	93490.4	99323.1	92248	95668.6	214993	151506	114176	136978	150818	x	x	x	x	CSID8181850	Nisterime acetate	M+NH4	C27H35ClN2O5	44.1	64.7	1.5436	57.5684	http://nonlinear.com/redirect/outbound?p=chemspider&param=8181850	0.0470344	3.91458
	6.30_383.3263m/z		383.326	1	6.29945	0.221283	7	0.452638	1.24273	ZIKV	Ctrl	100 - 25.3 - 3.69	57097.4	13.91	42443.6	54610.1	37689.1	48728.5	46254.8	45875.2	66644.7	53189.2	65081.9	54696.1	63400.4	48597.4	38189.3	48503.4	44267.5	61416.4	103374	56999.4	74713.7	55621.2	x	x	x	x	HMDB0062334	N-Linoleoyl GABA	M+NH4	C22H39NO3	49.4	49.3	-1.34721	99.1241	http://nonlinear.com/redirect/outbound?p=hmdb&param=HMDB0062334	0.0494681	2.29072
	2.26_466.2070m/z		466.207	1	2.25527	0.135633	2	0.349682	1.26232	ZIKV	Ctrl	81.1 - 100	19560.3	7.35	14309.8	17368.7	14989.5	15402.2	15407.1	20604.2	17057.9	19448	19181.6	21509.7	21375.4	15456.4	15188.4	15331.1	14745.1	27584.3	26458.8	20841.1	22020.4	21873.5	x	x	x	x	CSID8000665	Sergliflozin etabonate	M+NH4	C23H28O9	34.3	20.4	-0.412861	51.8264	http://nonlinear.com/redirect/outbound?p=chemspider&param=8000665	0.00180505	2.82795
	2.47_624.2983m/z		624.298	1	2.46957	1.26902	2	0.393803	1.2607	ZIKV	Ctrl	100 - 98	101413	5.72	81309.9	86220.6	80943.1	73348.2	80387	118882	85699.3	85809.8	100279	116394	121457	76727.6	82017.3	73009.5	76933.2	159156	132930	91956.7	115119	118363	x	x	x	x	CSID390572	Clerodendrin A	M+NH4	C31H42O12	37.7	29.8	-5.26918	64.6833	http://nonlinear.com/redirect/outbound?p=chemspider&param=390572	0.0181751	4.47809
	2.70_416.2179m/z		416.218	1	2.70442	0.655517	4	0.42576	1.2529	ZIKV	Ctrl	98.9 - 100	81860.1	6.96	65328.1	72532.7	64319.1	59910.3	64591.6	95391.6	69518.9	67801.5	81883.4	94705	97584.5	64546.7	65172.7	59633.6	61816.4	127708	107832	72658.4	94001.7	96306.7	x	x	x	x	CSID225836	4-Ethyl-3-(4-methoxyphenyl)-2,2-dimethyl-8-(1-pyrrolidinylmethyl)-2H-chromen-7-ol	M+Na	C25H31NO3	37.5	30.6	-4.433	61.888	http://nonlinear.com/redirect/outbound?p=chemspider&param=225836	0.0253986	3.52492
	2.63_506.2388m/z		506.239	1	2.6259	0.0999333	9	0.384376	1.24632	ZIKV	Ctrl	99.8 - 100 - 95.8 - 95.2 - 87.4	31850	6.38	25344.2	27747.6	24337.8	23756.5	26590.1	38180.1	27879.2	27523.4	30492.1	35175.2	37858.1	24692.5	24660.8	23646.8	25447.7	51114.5	43244.1	29495	35004.8	35770.1	x	x	x	x	CSID388449	Bekanamycin	M+Na	C18H37N5O10	34.2	54.5	-9.12289	26.5229	http://nonlinear.com/redirect/outbound?p=chemspider&param=388449	0.0163996	2.44256
	2.11_231.1691m/z		231.169	1	2.10517	0.156533	15	0.452638	1.2925	ZIKV	Ctrl	100 - 19.5	12735.7	11.51	11715.5	8894.75	9786.15	8985.69	9885.43	13390	9775.85	13221.4	11259.9	16031.2	17500.1	7915.42	9916.03	8944.19	9460.71	17926.2	15163.5	14168.5	12926.3	16302.4	x	x	x	x	HMDB0094807	2-nonenoylglycine	M+NH4	C11H19NO3	40.4	15.7	-5.8162	93.0979	http://nonlinear.com/redirect/outbound?p=hmdb&param=HMDB0094807	0.0346501	1.34508
	1.05_692.2565m/z		692.257	1	1.04842	0.577833	3	0.452638	1.24375	ZIKV	Ctrl	100	5587.85	10.73	4414.97	5606.2	3488.59	4348.51	4605.44	5020.83	5107.49	6036.93	6389.07	5384.93	6594.9	4988.95	3534.89	4328.42	4407.57	6721.75	7922.34	6469.38	7334.61	5476	x	x	x	x	CSID30791088	Premithramycin A2'	M+NH4	C33H38O15	39.4	32.6	2.42722	67.3321	http://nonlinear.com/redirect/outbound?p=chemspider&param=30791088	0.0356554	1.23636
	3.77_709.3418m/z		709.342	1	3.76718	1.81138	7	0.452638	1.25021	ZIKV	Ctrl	100 - 87.8 - 82.1	164607	8.68	134571	136808	126713	114974	145251	193765	134233	136549	172965	185524	201017	121745	128395	114442	139010	259408	208212	146331	198563	188661	x	x	x	x	HMDB0036946	Scillipheosidin 3-[glucosyl-(1->2)-rhamnoside]	M+H	C36H52O14	33.8	15.6	-1.59936	55.3466	http://nonlinear.com/redirect/outbound?p=hmdb&param=HMDB0036946	0.0384638	5.54326
	1.91_199.1211n	199.121	200.128	1	1.9058	0.349467	10	0.450026	1.24212	ZIKV	Ctrl	100 - 90.3	14763.1	7.42	11162.9	12741.6	11200.1	11376.1	12946.2	17003.6	11598.9	17161	13627.4	14424.4	16674.6	11338.7	11348.7	11323.6	12389.9	22764	17991.4	18390.3	15644.2	14668.4	x	x	x	x	HMDB0094801	2-octenoylglycine	M+H, M+NH4	C10H17NO3	37.3	29.9	1.26049	58.2031	http://nonlinear.com/redirect/outbound?p=hmdb&param=HMDB0094801	0.0316848	1.96471
	2.62_552.2672m/z		552.267	1	2.61877	1.01273	2	0.426195	1.24694	ZIKV	Ctrl	48.4 - 100 - 90.8	128530	6.29	104408	111916	96955.2	96430.9	105674	146828	105379	113725	123349	153369	155960	99593.4	98242	95985.5	101134	196569	163456	121871	141604	155963	x	x	x	x	CSID47814	Haloperidol decanoate	M+Na	C31H41ClFNO3	31.4	22.1	3.90177	39.7383	http://nonlinear.com/redirect/outbound?p=chemspider&param=47814	0.0257765	5.13062
	2.87_599.2777m/z		599.278	1	2.8686	1.6044	4	0.423773	1.23397	ZIKV	Ctrl	95.2 - 100	114584	7.34	89218.8	103010	92615.4	84734	94711.8	129149	94690.1	99298.7	121885	127896	133271	91668.3	93844.6	84342.6	90642.5	172901	146876	106412	139924	130059	x	x	x	x	HMDB0029368	Saxitoxin	2M+H	C10H17N7O4	35.8	29.3	3.41331	53.9528	http://nonlinear.com/redirect/outbound?p=hmdb&param=HMDB0029368	0.0240648	5.01701
	4.24_621.3189m/z		621.319	1	4.23795	0.4278	7	0.353723	1.22204	ZIKV	Ctrl	100 - 81.8	30108.3	5.92	25239.7	26259.2	24469.2	22308.8	24912.2	34842.3	30087.8	25052.5	29447.5	31111.5	37702	23368	24793.9	22205.7	23841.8	46645.8	46669.9	26847.1	33805.5	31637.7	x	x	x	x	HMDB0144281	3-methyl-4-oxo-1,2-diphenylbutan-2-yl propanoate	2M+H	C20H22O3	35.8	17	-3.51108	65.9477	http://nonlinear.com/redirect/outbound?p=hmdb&param=HMDB0144281	0.0109961	2.10511
	2.64_488.2568m/z		488.257	1	2.64018	0.256967	1	0.36089	1.24753	ZIKV	Ctrl	100 - 73.1	37301.7	4.57	31495.7	31059.1	28510.6	28620.9	29816.3	41118.3	30269	34354.5	37531.5	43235.1	47047	27639.5	28889	28488.7	28535.3	55048.1	46951	36815.4	43085.9	43966.3	x	x	x	x	CSID16737073	PICOTRIN DIOLAMINE	M+NH4	C29H30N2O4	33.5	0	5.18472	73.7139	http://nonlinear.com/redirect/outbound?p=chemspider&param=16737073	0.0127184	2.41353
	2.58_502.2455m/z		502.246	1	2.57593	1.55513	3	0.42576	1.23103	ZIKV	Ctrl	100 - 89.4 - 59	195310	7.04	153874	174639	155798	145066	163902	221144	160572	172702	199348	222783	229851	155411	157865	144396	156860	296061	249068	185073	228850	226550	x	x	x	x	CSID16736172	Sedecamycin	M+H	C27H35NO8	34.4	21.8	3.9547	54.6583	http://nonlinear.com/redirect/outbound?p=chemspider&param=16736172	0.0244022	6.01532
	2.64_668.3038m/z		668.304	1	2.64018	0.107067	4	0.42836	1.22843	ZIKV	Ctrl	100 - 25.6	6640.82	11.05	5632.62	6221.22	5138.74	4605.83	5431.24	7249.47	5779.19	6035.69	6350.86	7788.89	8413.77	5536.25	5206.94	4584.56	5197.89	9705.38	8964.24	6468.05	7290.75	7920.62	x	x	x	x	HMDB0129666	6-{4-[3-(3,7-dimethylocta-2,6-dien-1-yl)-7-hydroxy-8-(3-methylbut-2-en-1-yl)-4-oxo-4H-chromen-2-yl]-3-hydroxyphenoxy}-3,4,5-trihydroxyoxane-2-carboxylic acid	M+NH4	C36H42O11	39	17.4	-4.18649	82.6376	http://nonlinear.com/redirect/outbound?p=hmdb&param=HMDB0129666	0.0262969	1.19883
	1.88_513.2683m/z		513.268	1	1.8844	1.14145	10	0.452638	1.22307	ZIKV	Ctrl	93 - 100	134809	6.99	108088	120366	109362	99452.4	113841	137207	110554	120529	134077	171676	161458	107113	110814	98993	108950	183688	171483	129163	153920	174580	x	x	x	x	HMDB0060118	12-Hydroxy-13-O-D-glucuronoside-octadec-9Z-enoate	M+Na	C24H42O10	31	0	2.54564	58.0395	http://nonlinear.com/redirect/outbound?p=hmdb&param=HMDB0060118	0.0442803	4.90896
	2.64_528.2610m/z		528.261	1	2.64018	1.4905	1	0.350106	1.2112	ZIKV	Ctrl	98.7 - 100	155380	5.41	130702	137782	124505	119262	129175	177788	137032	140202	156314	165563	195237	122612	126158	118711	123625	238018	212554	150245	179448	168363	x	x	x	x	HMDB0000579	Deuteroporphyrin IX	M+NH4	C30H30N4O4	32.6	0	0.961476	64.16	http://nonlinear.com/redirect/outbound?p=hmdb&param=HMDB0000579	0.00899783	5.68299
	3.30_546.2464n	546.246	564.28	1	3.2964	1.2126	1	0.349682	1.20947	ZIKV	Ctrl	100 - 82.1	116868	5.76	97969	103679	93343.3	89141.7	99004.2	131590	103431	105399	118157	125763	146342	92263.9	94582.1	88730	94750.5	176168	160434	112950	135644	127890	x	x	x	x	CSID140322	Atrasentan hydrochloride	M+NH4, M+Na	C29H38ClN2O6	30	0	-5.97025	56.6527	http://nonlinear.com/redirect/outbound?p=chemspider&param=140322	0.00858885	4.71109
	2.62_515.2637m/z		515.264	1	2.61877	0.770583	5	0.374452	1.2103	ZIKV	Ctrl	93.2 - 100	95038.1	4.69	80262.2	83896.3	76339.9	74404.1	77720.5	108295	80550.1	85793.8	96832.5	103720	119892	74659.2	77353.1	74060.4	74381.3	144982	124943	91939.5	111163	105474	x	x	x	x	HMDB0037036	Glycinoeclepin C	M+H	C29H38O8	37.3	26.9	-0.435062	60.2993	http://nonlinear.com/redirect/outbound?p=hmdb&param=HMDB0037036	0.0145227	4.09179
	3.43_705.3447m/z		705.345	1	3.42505	0.1499	7	0.452638	1.1939	ZIKV	Ctrl	100 - 48 - 9.36	13156.7	8.78	10862.9	10713.2	10985.9	9945.71	12591.7	15070.1	12013	10996.8	13235.8	14467.8	16226.6	9533.67	11131.7	9899.78	12050.7	20175.5	18633.7	11784.5	15194.6	14712.5	x	x	x	x	HMDB0033039	Corchorusoside C	M+Na	C35H54O13	46.4	41.4	-1.38051	92.5283	http://nonlinear.com/redirect/outbound?p=hmdb&param=HMDB0033039	0.0374148	1.54417
	3.16_502.2702m/z		502.27	1	3.16077	0.66975	4	0.388844	1.18875	ZIKV	Ctrl	38.7 - 100 - 87.6	70025.8	6.32	60551	63224.9	55089.3	54902.6	60767.7	81508.8	62797.1	62724.3	70651.5	72447.5	90448.6	56263.7	55820.4	54649.1	58156.9	109122	97406	67217.5	81107.5	73672.8	x	x	x	x	CSID28529469	derquantel	M+Na	C28H37N3O4	30	29.8	5.38516	26.5058	http://nonlinear.com/redirect/outbound?p=chemspider&param=28529469	0.0173024	3.35661
	2.88_611.2948m/z		611.295	1	2.88308	0.948317	3	0.42836	1.18719	ZIKV	Ctrl	100 - 90.8 - 69.7	115963	9.31	97393.8	105386	89562.6	87897.9	108153	124329	108138	101491	113851	132009	145483	93782.9	90751.2	87491.9	103507	166448	167735	108761	130700	134242	x	x	x	x	CSID154046	cilengitide	M+Na	C27H40N8O7	43.5	71.3	6.12485	53.3086	http://nonlinear.com/redirect/outbound?p=chemspider&param=154046	0.0266776	4.26981
	2.75_524.2621m/z		524.262	1	2.74725	1.21995	11	0.353723	1.18776	ZIKV	Ctrl	82.2 - 100 - 90.7	162520	6.51	137533	149279	131388	125827	140115	178591	143134	150083	167675	173116	205442	132843	133132	125246	134095	239093	222019	160834	192490	176044	x	x	x	x	HMDB0129711	2-(2,4-dihydroxyphenyl)-3-(3,7-dimethylocta-2,6-dien-1-yl)-5,7-dihydroxy-6-(4-hydroxy-3-methylbut-2-en-1-yl)-4H-chromen-4-one	M+NH4	C30H34O7	27.4	0	-4.2445	41.8262	http://nonlinear.com/redirect/outbound?p=hmdb&param=HMDB0129711	0.0108154	5.68559
	9.95_371.2578m/z		371.258	1	9.9528	0.128483	15	0.452638	1.21227	ZIKV	Ctrl	100 - 7.78	6153.97	7.74	6831.26	4712.83	4882.2	4652.18	4303.54	6661.2	6519.94	5708.16	6277.1	5603.45	10204.3	4193.94	4947	4630.69	4118.64	8917.83	10113.2	6117.06	7206.08	5698.22	x	x	x	x	CSID214244	17beta-Hydroxy-2alpha-(methoxymethyl)-17-methyl-5alpha-androstan-3-one	M+Na	C22H36O3	41.6	30.8	6.25879	84.1209	http://nonlinear.com/redirect/outbound?p=chemspider&param=214244	0.0484406	1.44483
	2.24_511.2611m/z		511.261	1	2.241	1.08395	5	0.353723	1.18139	ZIKV	Ctrl	100 - 98.3	123160	6.07	103205	114227	103324	96597.3	103897	137567	111906	110720	127847	127761	154163	101650	104695	96151.2	99433	184171	173580	118651	146768	129921	x	x	x	x	CSID207512	1-Methyl-6-(1,2,3,4-tetrahydro-6-hydroxy-2-naphthyl)-2(1H)-pyridone	2M+H	C16H17NO2	33.6	13.7	3.77938	58.8668	http://nonlinear.com/redirect/outbound?p=chemspider&param=207512	0.0108704	5.16194
	2.40_491.2366m/z		491.237	1	2.39803	0.427733	7	0.412794	1.18218	ZIKV	Ctrl	65.2 - 90.1 - 100 - 30.7	73807.8	6.56	61292.6	68370.7	62349.6	56956.8	63199.6	82456.5	65298	65170.2	76746.2	79368.1	91556.3	60843	63177.1	56693.8	60484.2	110391	101285	69838.6	88104.2	80710.4	x	x	x	x	CSID388681	Gentamycin A	M+Na	C18H36N4O10	30.7	34.8	9.06177	28.612	http://nonlinear.com/redirect/outbound?p=chemspider&param=388681	0.0216524	3.60183
	3.98_564.2890m/z		564.289	1	3.98168	1.45503	2	0.412794	1.17731	ZIKV	Ctrl	95 - 100 - 2.45	103149	7.03	89071.3	93786	81866.8	80477.3	92868.1	121474	95443	97464	94831.1	106531	133051	83460	82953.3	80105.6	88878.1	162626	148044	104446	108866	108332	x	x	x	x	CSID30791215	(1S,3S,4S,5S,7S,9S,12R,13S,15R,16S,17R)-3,4,7-Trihydroxy-9,11-dimethyl-19-methylene-11-azahexacyclo[12.3.2.0~1,13~.0~4,9~.0~5,12~.0~5,17~]nonadecane-15,16-diyl (2E,2'E)bis(2-methyl-2-butenoate)	M+Na	C31H43NO7	35.1	20.9	-7.69224	63.3332	http://nonlinear.com/redirect/outbound?p=chemspider&param=30791215	0.0218475	4.1143
	3.52_515.2247n	515.225	533.259	1	3.51783	2.88868	1	0.394962	1.18056	ZIKV	Ctrl	97.9 - 100	363539	6.44	308276	335216	298178	282049	315975	411211	318653	332135	369409	386287	460489	298308	302135	280747	302399	550518	494271	355927	424080	392821	x	x	x	x	HMDB0006595	Alpha-Trisaccharide	M+NH4, M+Na	C20H37NO14	36.4	30.5	6.40802	58.5619	http://nonlinear.com/redirect/outbound?p=hmdb&param=HMDB0006595	0.0183867	8.20194
	2.41_400.2055m/z		400.205	1	2.40517	0.848583	3	0.414034	1.16113	ZIKV	Ctrl	97.9 - 100 - 75.3	153449	7.61	123328	153778	127411	123611	132646	165692	139750	143104	163294	155407	184222	136847	129102	123040	126947	221824	216770	153355	187460	158036	x	x	x	x	HMDB0014361	Eletriptan	M+NH4	C22H26N2O2S	29.4	0	0.451393	47.5598	http://nonlinear.com/redirect/outbound?p=hmdb&param=HMDB0014361	0.0225241	6.19362
	6.36_898.4794m/z		898.479	1	6.35657	0.4135	2	0.412551	1.155	ZIKV	Ctrl	100 - 94.8 - 50.5	11429.3	7.49	10516.9	9644.76	9121.62	9208.03	10986.1	12332.1	11881.6	11352	10051.3	11529.5	15709.7	8582.85	9242.68	9165.5	10514.1	16509.9	18429.9	12165.2	11538.9	11724.5	x	x	x	x	CSID16735908	MOM	M+H	C45H71NO17	44.7	57.2	-0.131352	66.6132	http://nonlinear.com/redirect/outbound?p=chemspider&param=16735908	0.0210744	1.68021
	2.23_285.1682m/z		285.168	1	2.22672	0.29995	11	0.444805	1.1442	ZIKV	Ctrl	100 - 96.5 - 47 - 41.1	53470.8	7.89	47651.8	52162	44449.6	42399.1	46997.7	60216.9	53089.7	49196	55240.5	49611.1	71180.3	46418.9	45039.5	42203.3	44978.4	80616.7	82348.6	52720.1	63415.8	50450.1	x	x	x	x	CSID392046	Voglibose	M+NH4	C10H21NO7	31.3	27	9.60527	40.0422	http://nonlinear.com/redirect/outbound?p=chemspider&param=392046	0.0301626	3.36551
	2.34_343.1874m/z		343.187	1	2.34093	0.171467	22	0.384765	1.15038	ZIKV	Ctrl	86.5 - 100	24969.7	6.03	21380.1	24987.4	20391.3	20237.3	21532	26069.5	22697.6	24303.2	26420.6	25357.7	31936.7	22236.2	20661.9	20143.8	20606.9	34901.1	35206.7	26044.1	30330.7	25786.6	x	x	x	x	HMDB0034363	Monocrotaline	M+NH4	C16H23NO6	35.6	30.5	3.27656	51.5541	http://nonlinear.com/redirect/outbound?p=hmdb&param=HMDB0034363	0.0165941	2.45874
	2.95_400.2130m/z		400.213	1	2.94733	0.2786	4	0.452638	1.14896	ZIKV	Ctrl	100 - 92.6	30479	6.64	26175.8	29336.4	25288.8	24891.2	26944.9	34228.8	27093.2	28183	29265.3	33624.6	39100.4	26106.4	25624.5	24776.3	25787.2	45824.6	42024.8	30201.9	33596.4	34193.3	x	x	x	x	HMDB0033237	1,2,10-Trihydroxydihydro-trans-linalyl oxide 7-O-beta-D-glucopyranoside	M+NH4	C16H30O10	32.9	17.8	-12.459	60.0101	http://nonlinear.com/redirect/outbound?p=hmdb&param=HMDB0033237	0.039737	2.18678
	2.76_466.2396m/z		466.24	1	2.76153	0.834117	14	0.42576	1.14792	ZIKV	Ctrl	97.3 - 100	93883.6	7.31	80557.9	91141.9	79061.8	75093.8	83075.2	99028.1	83573.3	87264.6	99129.2	100423	120334	81107	80111.1	74747	79505.9	132576	129633	93515.7	113800	102121	x	x	x	x	HMDB0010317	17-beta-Estradiol glucuronide	M+NH4	C24H32O8	34.1	20.2	-8.8636	60.2303	http://nonlinear.com/redirect/outbound?p=hmdb&param=HMDB0010317	0.0251027	3.96071
	2.17_375.1913m/z		375.191	1	2.16962	0.698683	10	0.452638	1.1463	ZIKV	Ctrl	100 - 91.7	86822.5	8.15	74940	85504.1	73250.4	68688.4	76325.6	90461.6	75870.9	81632.3	94483.7	91663.9	111942	76089.9	74222.5	68371.2	73046.3	121107	117685	87479.9	108467	93214.2	x	x	x	x	HMDB0135470	N-[2-(3,4-dimethoxyphenyl)ethyl]-3-(3-hydroxy-4-methoxyphenyl)prop-2-enimidic acid	M+NH4	C20H23NO5	37.4	25.3	-0.53879	62.6179	http://nonlinear.com/redirect/outbound?p=hmdb&param=HMDB0135470	0.0371855	4.15892
	4.16_444.2259n	444.226	445.233	1	4.15943	2.24007	1	0.452638	1.10938	ZIKV	Ctrl	100 - 76.9 - 1.07	254019	5.59	220100	248651	233354	216156	226613	268117	267802	226368	261687	246124	328776	221274	236451	215158	216877	358948	415393	242583	300415	250286	x	x	x	x	CSID85084	Dimetacrine bitartrate	M+H, M+Na	C24H32N2O6	34	0	-0.327995	70.3802	http://nonlinear.com/redirect/outbound?p=chemspider&param=85084	0.0349513	1.6231
	3.04_488.2712m/z		488.271	1	3.04013	0.23485	3	0.452638	1.12238	ZIKV	Ctrl	100 - 48.9	31107.2	4.3	28196.4	28414.6	25641.8	27809.5	28515.2	33811.7	27623.2	29016	34094.6	30990.7	42118.6	25286.1	25982.1	27681.1	27290	45266.2	42847	31094.5	39140.4	31514.9	x	x	x	x	HMDB0032799	(R)-1-O-[b-D-Glucopyranosyl-(1->6)-b-D-glucopyranoside]-1,3-octanediol	M+NH4	C20H38O12	41.6	31.3	2.13392	79.3191	http://nonlinear.com/redirect/outbound?p=hmdb&param=HMDB0032799	0.0393143	1.86169
	11.37_427.3565m/z		427.357	1	11.3731	0.186	14	0.349682	1.30365	Ctrl	ZIKV	100 - 28.3 - 38	27493.5	8.34	28385.1	28496.9	24311.4	30168.1	26106	25765.4	18131.3	19441	21574.4	20536	42400.4	25359.3	24634.1	30028.7	24984.3	34494.1	28124	20833.6	24767.3	20883.3	x	x	x	x	HMDB0031080	Momordenol	M+H	C29H46O2	44.7	46.5	-1.24017	78.3595	http://nonlinear.com/redirect/outbound?p=hmdb&param=HMDB0031080	0.00503926	1.29137
	6.77_309.2060m/z		309.206	1	6.77027	0.107083	28	0.361298	1.39117	Ctrl	ZIKV	100 - 8.35	3784.63	5.79	4424.67	4041.2	4376.18	3412.02	2669.11	2650.89	2966.34	2689.71	2753.56	2541.88	6609.39	3596.25	4434.26	3396.26	2554.43	3548.94	4601.16	2882.38	3161.07	2584.88	x	x	x	x	CSID30792014	Soraphen O	M+H	C18H28O4	39.9	11.3	0.013014	88.1481	http://nonlinear.com/redirect/outbound?p=chemspider&param=30792014	0.0127884	1.37336
	10.19_439.3205m/z		439.321	1	10.1877	0.164383	41	0.452638	1.39405	Ctrl	ZIKV	100 - 25.2	18541.2	17.61	19844.2	17896.4	23401.7	14863.8	16699.9	18380.6	9868.51	15572.3	11840.3	10839.4	29642.4	15926	23712.3	14795.1	15982.4	24607.5	15307.3	16687.8	13592.6	11022.8	x	x	x	x	HMDB0012453	3 beta-Hydroxy-5-cholestenoate	M+Na	C27H44O3	45.3	40.4	5.41503	92.5117	http://nonlinear.com/redirect/outbound?p=hmdb&param=HMDB0012453	0.0373727	1.20835
	4.74_364.2946m/z		364.295	1	4.74428	0.121533	1	0.437425	1.40998	Ctrl	ZIKV	100 - 26.9	10748.1	8.5	10090.5	11569.7	9475.87	11330.6	11273.9	8061.23	5134.39	10853	8351.15	5714.8	15072.8	10295.8	9601.63	11278.3	10789.6	10792.1	7964.08	11630.4	9587.07	5811.45	x	x	x	x	CSID30791523	Istamycin C0	M+NH4	C16H34N4O4	36.6	0	7.91396	91.9718	http://nonlinear.com/redirect/outbound?p=chemspider&param=30791523	0.0283591	1.21277
	3.10_146.0599m/z		146.06	1	3.10367	0.0856667	25	0.36089	1.43709	Ctrl	ZIKV	100 - 11	15571.2	12.9	17192.2	16336.3	16648.5	12140.3	15538.7	13592.1	9224.13	13146.7	9984.35	8228.85	25681	14537.6	16869.4	12084.2	14871.1	18196.8	14307.8	14088.4	11462	8368.03	x	x	x	x	CSID62357	VC4070000	M+H	C9H7NO	46.5	34.9	-0.852866	98.6828	http://nonlinear.com/redirect/outbound?p=chemspider&param=62357	0.0125141	1.26459
	6.78_269.2072m/z		269.207	1	6.7774	0.164183	1	0.380049	1.50175	Ctrl	ZIKV	100 - 5.49	2772.01	9.14	2948.14	3138.46	3586.87	2345.19	1841.41	1597.61	1851.85	1827.67	2070.6	1881.58	4403.81	2792.91	3634.47	2334.36	1762.3	2138.83	2872.44	1958.59	2377.04	1913.4	x	x	x	x	HMDB0034557	8,8-Diethoxy-2,6-dimethyl-2-octanol	M+Na	C14H30O3	36.5	0	-6.20386	89.7745	http://nonlinear.com/redirect/outbound?p=hmdb&param=HMDB0034557	0.0153237	1.17589
	3.10_191.0580n	191.058	192.065	1	3.10367	0.0927833	10	0.349682	1.56534	Ctrl	ZIKV	100 - 13.1 - 0.537	17262.6	11.51	16395	18441.8	19328.2	14263	17885	12598.3	8997.15	14316.6	10479.8	8748.14	24490.2	16411.3	19584.7	14197.1	17116.6	16866.2	13955.7	15342.1	12030.7	8896.09	x	x	x	x	HMDB0060400	5-Phenyl-1,3-oxazinane-2,4-dione	M+H, M+Na	C10H9NO3	41.7	12	-1.16544	97.9606	http://nonlinear.com/redirect/outbound?p=hmdb&param=HMDB0060400	0.00293477	1.4928
	10.62_439.3211m/z		439.321	1	10.6232	0.213633	41	0.36089	1.62124	Ctrl	ZIKV	100 - 8.56	6399.13	17.26	5108.29	8126.13	6411.85	6429.11	5920.29	4360.47	3070.68	4312.59	5496.92	2494.64	7630.56	7231.43	6496.95	6399.42	5665.93	5837.68	4763.01	4621.52	6310.42	2536.83	x	x	x	x	CSID13085538	2,22,25-trideoxyecdysone	M+Na	C27H44O3	40.8	31.7	6.92273	80.2301	http://nonlinear.com/redirect/outbound?p=chemspider&param=13085538	0.0125783	1.05916
	6.54_323.1850m/z		323.185	1	6.53518	0.185067	18	0.374541	1.77224	Ctrl	ZIKV	100 - 14.1	6102.3	20.21	9468.5	5513.32	3738.78	6521.35	5269.55	3181.68	3481.88	4548.22	2643.18	3361.41	14143.7	4906.29	3788.4	6491.23	5043.15	4259.54	5400.82	4874.03	3034.35	3418.26	x	x	x	x	HMDB0028967	Methionyl-Arginine	M+NH4	C11H23N5O3S	39.4	7.29	-3.16717	93.6105	http://nonlinear.com/redirect/outbound?p=hmdb&param=HMDB0028967	0.0147558	1.50618
	1.93_315.0957m/z		315.096	1	1.92722	0.200067	14	0.452638	2.26455	Ctrl	ZIKV	100 - 17.1 - 7.12	20366.9	43.36	8015.08	19533.7	32920.7	20034.8	21330.3	6398.63	2850	8320.6	10335	17064.9	11972.6	17383	33357.6	19942.3	20413.8	8566.32	4420.7	8916.63	11864.5	17353.5	x	x	x	x	HMDB0041309	(2S,4S)-Monatin	M+Na	C14H16N2O5	41.8	16.3	1.89657	95.1995	http://nonlinear.com/redirect/outbound?p=hmdb&param=HMDB0041309	0.0464215	4.23137
	7.87_403.2929n	403.293	421.306	1	7.86877	0.135833	1	0.356229	2.68358	Ctrl	ZIKV	100 - 25.3	29214.3	39.99	36466.5	12355.7	21287.2	37556.8	38405.7	12338.1	14565.2	15030	6250.88	6247.6	54472.1	10995.3	21569.7	37383.3	36755.6	16517.9	22592.4	16106.6	7175.97	6353.27	x	x	x	x	CSID28419934	Spergualin	M+H, M+NH4	C17H37N7O4	38.9	5.97	5.31803	94.4304	http://nonlinear.com/redirect/outbound?p=chemspider&param=28419934	0.0114303	4.78895
	3.29_506.1513m/z		506.151	1	3.28925	0.03585	1	0.384376	3.13902	Ctrl	ZIKV	72.4 - 100 - 13	2603.22	58.66	2188.74	2290.6	5710.52	1508.34	1317.9	316.765	767.2	546.309	1598.96	917.317	3269.44	2038.4	5786.31	1501.38	1261.27	424.076	1190.02	585.443	1835.59	932.831	x	x	x	x	CSID140122	tipifarnib	M+NH4	C27H22Cl2N4O	27.4	0	0.811607	37.9585	http://nonlinear.com/redirect/outbound?p=chemspider&param=140122	0.0157158	1.27203
	4.28_655.1942m/z		655.194	1	4.28078	0.0713833	3	0.452638	9.38063	Ctrl	ZIKV	100 - 31.9 - 9.94	5816.8	140.36	232.183	3436.98	20127.7	4197.1	1090.05	33.3682	159.111	88.5969	2589.7	229.653	346.826	3058.56	20394.8	4177.71	1043.21	44.6724	246.801	94.9434	2972.96	233.537	x	x	x	x	HMDB0010316	Acetaminophen glucuronide	2M+H	C14H17NO8	35.6	1.34	-6.02691	83.6097	http://nonlinear.com/redirect/outbound?p=hmdb&param=HMDB0010316	0.0428393	1.38591
	2.80_1173.4387m/z		1173.44	1	2.80435	0.135833	2	0.349682	9.63528	Ctrl	ZIKV	100 - 31.9 - 2.56	6104.29	82.75	2822.31	6774.65	4121.04	14580.5	2222.99	240.644	152.998	1086.05	1637.49	50.5002	4215.86	6028.75	4175.74	14513.1	2127.48	322.168	237.319	1163.84	1879.83	51.3543	x	x	x	x	HMDB0126235	2-{2,6-dihydroxy-4-[6-hydroxy-7-(3-methylbut-2-en-1-yl)-1-benzofuran-2-yl]phenyl}-6-(2,4-dihydroxy-5-methoxyphenyl)-4-methylcyclohex-3-ene-1-carboxylic acid	2M+H	C34H34O9	38.8	11.8	-7.79132	90.9394	http://nonlinear.com/redirect/outbound?p=hmdb&param=HMDB0126235	0.00560692	2.62432
	2.80_1172.9356m/z		1172.94	1	2.80435	0.121567	1	0.349682	25.4766	Ctrl	ZIKV	100 - 67.9 - 8.28	6785.46	90.51	2647.58	7263.86	4937.62	17120.3	1957.89	0	0	612.858	718.845	0	3954.84	6464.09	5003.15	17041.3	1873.77	0	0	656.759	825.23	0	x	x	x	x	CSID13134960	Macitentan	2M+H	C19H20Br2N6O4S	23.6	0.73	1.4494	19.1009	http://nonlinear.com/redirect/outbound?p=chemspider&param=13134960	0.00789926	2.8566
[truncated: 1 more columns]

## Sheet: ZIKV_Brain
															Normalised abundance										Raw abundance
															Ctrl					ZIKV					Ctrl					ZIKV					Tags
	Compound	Neutral mass (Da)	m/z	Charge	Retention time (min)	Chromatographic peak width (min)	Identifications	q Value	Max Fold Change	Highest Mean	Lowest Mean	Isotope Distribution	Maximum Abundance	Minimum CV%	Ctrl-1_neg	Ctrl-2_neg	Ctrl-3_neg	Ctrl-4_neg	Ctrl-5_neg	ZIKV-1_neg	ZIKV-2_neg	ZIKV-3_neg	ZIKV-4_neg	ZIKV-5_neg	Ctrl-1_neg	Ctrl-2_neg	Ctrl-3_neg	Ctrl-4_neg	Ctrl-5_neg	ZIKV-1_neg	ZIKV-2_neg	ZIKV-3_neg	ZIKV-4_neg	ZIKV-5_neg	ZIKV vs Ctrl VIP>1	Minimum CV <= 30	ZIKV vs Ctrl Anova p-value <= 0.05	ZIKV vs Ctrl	Accepted Compound ID	Accepted Description	Adducts	Formula	Score	Fragmentation Score	Mass Error (ppm)	Isotope Similarity	Compound Link	Anova (p)	VIP
neg	0.92_598.9704m/z		598.97	1	0.916	0.107467	1	1	1.11675	ZIKV	Ctrl	100 - 85.3 - 85.5 - 67.5	1598.73	4.58	1441.51	1528.17	1362.69	1378.9	1446.69	1809.96	1658.43	1553.81	1541.08	1430.38	1398.35	1885.19	2060.06	1572.02	934.998	1754.76	1634.88	1457.79	1564.54	1758.31	x	x	x	x	CSID17342538	Selumetinib sulfate	M+FA-H	C17H17BrClFN4O7S	28	0	8.66524	49.6661	http://nonlinear.com/redirect/outbound?p=chemspider&param=17342538	0.0410209	1.00634
	5.09_369.2270m/z		369.227	1	5.08622	0.12065	12	1	1.26063	Ctrl	ZIKV	100 - 20.8 - 0.633	1180.97	12.07	1113.3	1078.45	1080.75	1217.05	1415.27	987.101	741.99	1152.46	911.84	890.635	1079.96	1330.4	1633.85	1387.5	914.695	956.993	731.456	1081.24	925.716	1094.82	x	x	x	x	HMDB0031007	1-Acetoxy-2-hydroxy-16-heptadecyn-4-one	M+FA-H	C19H32O4	38.6	0	-4.04286	97.7179	http://nonlinear.com/redirect/outbound?p=hmdb&param=HMDB0031007	0.0280353	1.25287
	4.77_893.4710m/z		893.471	1	4.7726	0.0858833	4	1	1.73085	Ctrl	ZIKV	100 - 42.2	396.263	16.94	389.247	405.045	376.735	498.32	311.968	80.0656	201.216	211.045	441.678	210.701	377.592	499.676	569.534	568.11	201.625	77.6235	198.359	198.003	448.4	259.006	x	x	x	x	CSID391396	S-Decyl GSH	2M-H	C20H37N3O6S	37.9	11.2	-2.58653	81.4017	http://nonlinear.com/redirect/outbound?p=chemspider&param=391396	0.0433357	1.02619
	6.12_329.2318m/z		329.232	1	6.12193	0.107083	31	1	1.93326	Ctrl	ZIKV	100 - 11.1	442.025	24.49	482.074	198.932	455.599	668.577	404.946	302.157	163.9	269.675	206.67	200.809	467.64	245.408	688.758	762.212	261.718	292.941	161.573	253.01	209.815	246.846	x	x	x	x	HMDB0038685	Muricatacin	M+FA-H	C17H32O3	37	0	-5.55513	91.5591	http://nonlinear.com/redirect/outbound?p=hmdb&param=HMDB0038685	0.0277095	1.17676
	2.32_785.4574m/z		785.457	1	2.3241	0.0858667	4	1	2.1221	Ctrl	ZIKV	100 - 39.6 - 6.38	922.449	26.71	923.699	842.946	985.906	1270.68	589.011	80.2371	438.639	362.92	968.421	323.216	896.041	1039.88	1490.46	1448.64	380.679	77.7897	432.411	340.493	983.158	397.315	x	x	x	x	CSID225836	4-Ethyl-3-(4-methoxyphenyl)-2,2-dimethyl-8-(1-pyrrolidinylmethyl)-2H-chromen-7-ol	2M-H	C25H31NO3	47.2	51.3	4.90324	90.269	http://nonlinear.com/redirect/outbound?p=chemspider&param=225836	0.0463425	1.77495
	6.67_499.2976n	499.298	498.29	1	6.6717	0.21345	5	1	2.45859	Ctrl	ZIKV	100 - 28.6	562.584	23.98	590.43	640.929	729.484	445.569	406.509	438.684	26.1199	198.549	217.357	263.408	572.751	790.669	1102.81	507.971	262.728	425.303	25.7491	186.28	220.665	323.796	x	x	x	x	HMDB0000896	Taurodeoxycholic acid	M-H, 2M-H	C26H45NO6S	37.9	1.32	1.75698	90.2151	http://nonlinear.com/redirect/outbound?p=hmdb&param=HMDB0000896	0.043302	1.5829
	5.51_515.2926n	515.293	514.285	1	5.50828	0.414283	10	1	3.12312	Ctrl	ZIKV	100 - 40.6 - 15.4 - 3.46 - 0.309 - 0.0289	15543.2	40.63	18721.6	20471.3	20163.5	12558.3	5801.17	7269.23	790.548	4176.3	3143.59	9504.34	18161	25254	30482.4	14317.1	3749.31	7047.51	779.324	3918.22	3191.43	11683.3	x	x	x	x	CSID10128490	taurohyocholic acid	M-H, 2M-H	C26H45NO7S	38.5	5.38	1.68347	89.3773	http://nonlinear.com/redirect/outbound?p=chemspider&param=10128490	0.0275677	8.6863
	5.51_599.2638m/z		599.264	1	5.50828	0.2425	13	1	3.26415	Ctrl	ZIKV	100 - 25.4 - 7.6 - 1.5	284.91	28.52	375.99	250.178	218.122	211.4	368.86	75.4125	5.4348	41.6911	231.65	82.2346	364.732	308.627	329.75	241.007	238.395	73.1123	5.35764	39.1148	235.175	101.087	x	x	x	x	HMDB0030755	Myrigalone E	2M-H	C18H20O4	37.8	0	-2.07726	91.3356	http://nonlinear.com/redirect/outbound?p=hmdb&param=HMDB0030755	0.0277241	1.21796
	4.54_515.2921n	515.292	514.285	1	4.53703	0.2137	10	1	3.32505	Ctrl	ZIKV	100 - 31.2 - 9.81 - 2.13 - 0.165	3185.17	44.17	3864.51	4224.87	4282.15	2553.41	1000.91	1072.36	109.07	840.247	486.916	2281.07	3748.8	5211.92	6473.61	2911.02	646.893	1039.65	107.522	788.324	494.325	2804.01	x	x	x	x	CSID10128490	taurohyocholic acid	M-H, 2M-H	C26H45NO7S	39.7	0.555	0.758102	98.6964	http://nonlinear.com/redirect/outbound?p=chemspider&param=10128490	0.0336048	3.92388
	4.70_599.2629m/z		599.263	1	4.70102	0.2648	13	1	4.9295	Ctrl	ZIKV	100 - 25.4 - 8.51 - 0.688	158.893	34.21	206.143	173.762	206.351	127.667	80.5414	23.9649	0.24815	13.8178	56.2163	66.9183	199.971	214.357	311.954	145.547	52.0541	23.2339	0.244627	12.9639	57.0717	82.2597	x	x	x	x	HMDB0030755	Myrigalone E	2M-H	C18H20O4	37.4	0	-3.60839	91.24	http://nonlinear.com/redirect/outbound?p=hmdb&param=HMDB0030755	0.0285737	1.00888
	5.05_512.2694m/z		512.269	1	5.05123	0.1492	4	1	6.95298	Ctrl	ZIKV	100 - 28.8	591.076	45.56	713.386	645.995	936.664	419.026	240.309	80.6524	0	103.52	73.0578	167.822	692.026	796.919	1416.01	477.711	155.312	78.1924	0	97.1233	74.1696	206.296	x	x	x	x	HMDB0062801	Sulfoglycolithocholate(2-)	M-H	C26H43NO7S	54.5	84	1.17515	90.1033	http://nonlinear.com/redirect/outbound?p=hmdb&param=HMDB0062801	0.0375389	1.98116
	4.88_512.2694m/z		512.269	1	4.8799	0.5142	4	1	12.5181	Ctrl	ZIKV	100 - 29.7	282.864	64.65	261.087	455.459	473.532	178.693	45.551	9.25813	0	0	11.5616	92.1627	253.269	561.868	715.869	203.719	29.4397	8.97574	0	0	11.7376	113.292	x	x	x	x	HMDB0002639	Sulfolithocholylglycine	M-H	C26H43NO7S	37.8	0	1.36805	90.8008	http://nonlinear.com/redirect/outbound?p=hmdb&param=HMDB0002639	0.00823433	1.34705
pos	12.12_340.3552m/z		340.355	1	12.1188	0.399283	1	0.866232	2.70253	ZIKV	Ctrl	100 - 5.83	3439.43	13.32	1185.13	1284.75	1123.33	1212.58	1557.56	5524.75	2571.77	1901.07	1388.29	5811.27	1250.73	2553.57	2059.32	1608.72	1456.4	6781.25	2095.11	2645.88	1733.85	9975.91	x	x	x	x	HMDB0000583	Docosanamide	M+H	C22H45NO	36.4	6.91	-6.43917	82.6055	http://nonlinear.com/redirect/outbound?p=hmdb&param=HMDB0000583	0.0201455	2.51534
	12.48_311.2543m/z		311.254	1	12.4839	0.18735	2	0.866232	1.92475	ZIKV	Ctrl	100 - 3.8	1148.92	20.5	462.952	589.352	516.571	781.328	634.396	2090.31	1015.9	847.768	1059.56	731.059	488.581	1171.4	946.992	1036.58	593.193	2565.71	827.611	1179.91	1323.3	1254.97	x	x	x	x	HMDB0031060	(R)-2-Hydroxysterculic acid	M+H	C19H34O3	34.5	1.59	-12.1625	83.6801	http://nonlinear.com/redirect/outbound?p=hmdb&param=HMDB0031060	0.0177798	1.25228
	2.72_246.1696m/z		246.17	1	2.71563	0.0859167	6	0.866232	1.65985	ZIKV	Ctrl	100 - 12 - 0.144	1558.34	27.72	824.562	874.522	656.16	963.547	1375.43	2221.75	1126.13	1711.12	1472.08	1260.64	870.209	1738.2	1202.89	1278.33	1286.1	2727.05	917.406	2381.5	1838.5	2164.08	x	x	x	x	HMDB0030994	5-Heptyltetrahydro-2-oxo-3-furancarboxylic acid	M+NH4	C12H20O4	40.1	5.2	-1.80075	97.4103	http://nonlinear.com/redirect/outbound?p=hmdb&param=HMDB0030994	0.0172792	1.40624
	3.96_856.4163m/z		856.416	1	3.96483	0.0713833	4	0.866232	1.45907	Ctrl	ZIKV	100	1254.23	16.38	1050.26	1147.5	1121.91	1467.65	1483.83	681.689	773.345	1091.28	1070.68	681.027	1108.4	2280.77	2056.71	1947.12	1387.46	836.726	630.01	1518.83	1337.19	1169.09	x	x	x	x	HMDB0116068	CDP-DG(a-13:0/i-12:0)	M+H	C37H67N3O15P2	33.7	10.7	4.97373	63.5906	http://nonlinear.com/redirect/outbound?p=hmdb&param=HMDB0116068	0.0157663	1.15268
	2.26_208.0457m/z		208.046	1	2.2592	0.0999333	5	0.866232	1.61532	Ctrl	ZIKV	100 - 7.13 - 7.64	1096.56	23.37	1068.84	933.911	857.328	1104.12	1518.61	496.286	493.751	939.161	902.693	562.356	1128.01	1856.24	1571.68	1464.83	1419.98	609.156	402.237	1307.11	1127.39	965.368	x	x	x	x	HMDB0033136	2-Amino-4-hydroxy-6-pteridinecarboxylic acid	M+H	C7H5N5O3	39.1	7.86	-4.1601	92.281	http://nonlinear.com/redirect/outbound?p=hmdb&param=HMDB0033136	0.020285	1.15752
	2.32_393.2286n	393.229	787.455	1	2.32345	0.06425	4	0.866232	2.20546	Ctrl	ZIKV	100 - 12.1	915.211	16.65	836.858	778.815	859.18	1169.74	931.464	213.003	212.486	463.902	872.178	313.303	883.185	1547.97	1575.07	1551.88	870.967	261.447	173.103	645.65	1089.28	537.831	x	x	x	x	CSID10128127	oxidized Cypridina luciferin	M+H, 2M+H	C21H27N7O	37.4	2.97	2.24707	86.7433	http://nonlinear.com/redirect/outbound?p=chemspider&param=10128127	0.00952317	1.34202
[truncated: 1 more columns]
